# Supplementary material for: Genetic factors and symptom dimensions associated with antidepressant treatment outcomes: clues for new potential therapeutic targets?
Source: Eur Arch Psychiatry Clin Neurosci. 2024 Aug 27;275(6):1637–51. doi: 10.1007/s00406-024-01873-1 (PMC12500787; doi:10.1007/s00406-024-01873-1)
Supplement: Supplementary file 1 — Supplementary file1 (XLSX 459 KB) [file 406_2024_1873_MOESM1_ESM.xlsx]

## Sheet: SupplementaryTable1_SNP
Supplementary table 1: suggestive (5e-8 < p <5e-6) association signals at variant level with the phenotypes of interest, with significant loci (p<5e-8) in bold.
Author, year	PMID	Dimension/outcome	Type of study	Cohort	Sample size	Locus/variant	Gene(s) corresponding to locus/variant
Treatment outcomes
Kang et al., 2023 (pre-print)	38745458	TRD	Meta-analysis of GWAS	MGB	2126	rs56313538	FTO
Kang et al., 2023 (pre-print)	38745458	TRD	Meta-analysis of GWAS	MGB	15305	rs133082	MCHR1
Huang et al., 2023	36658263	% symptom change	GWAS	Taiwanese Han - insomnia (SSRI)	421	rs73121794	ARAP2
Huang et al., 2023	36658263	% symptom change	GWAS	Taiwanese Han - insomnia (SSRI)	421	rs139016962	ARNT2
Huang et al., 2023	36658263	% symptom change	GWAS	Taiwanese Han - anorexia	421	rs11100898	C4orf51
Huang et al., 2023	36658263	% symptom change	GWAS	Taiwanese Han - core (SSRI)	421	rs76455288	CTNNA3
Huang et al., 2023	36658263	% symptom change	GWAS	Taiwanese Han - psychomotor-insight (SSRI)	421	rs150107914	ENSG00000286536, LOC105376197
Huang et al., 2023	36658263	% symptom change	GWAS	Taiwanese Han - anorexia (SSRI)	421	rs3013268	ENSG00000288162
Huang et al., 2023	36658263	% symptom change	GWAS	Taiwanese Han - total (SSRI)	421	rs2182717	ENSR00000803469
Huang et al., 2023	36658263	% symptom change	GWAS	Taiwanese Han - total (SSRI)	421	rs9852609	KCNMB4
Huang et al., 2023	36658263	% symptom change	GWAS	Taiwanese Han - core (SSRI)	421	rs2372232	LINC02388
Huang et al., 2023	36658263	% symptom change	GWAS	Taiwanese Han - insomnia (SSRI)	421	rs150365503	LOC105369788
Huang et al., 2023	36658263	% symptom change	GWAS	Taiwanese Han - somatic anxiety (SSRI)	421	rs73072994	LOC105373890
Huang et al., 2023	36658263	% symptom change	GWAS	Taiwanese Han - insomnia (SSRI)	421	rs72948878	LOC105377152
Huang et al., 2023	36658263	% symptom change	GWAS	Taiwanese Han - core (SSRI)	421	rs9969351	MAGI2
Huang et al., 2023	36658263	% symptom change	GWAS	Taiwanese Han - psychomotor-insight (SSRI)	421	rs1527308	MGAM
Huang et al., 2023	36658263	% symptom change	GWAS	Taiwanese Han - psychomotor-insight (SSRI)	421	rs147377383	PRF1
Huang et al., 2023	36658263	% symptom change	GWAS	Taiwanese Han - anorexia	421	rs3788340	RSPH14, GNAZ
Huang et al., 2023	36658263	% symptom change	GWAS	Taiwanese Han - somatic anxiety (SSRI)	421	rs144205281	TMEM132C
Huang et al., 2023	36658263	% symptom change	GWAS	Taiwanese Han - anorexia	421	rs141312369	UGCG
Huang et al., 2023	36658263	% symptom change	GWAS	Taiwanese Han - psychomotor-insight (SSRI)	421	rs824315	UTP20
Huang et al., 2023	36658263	% symptom change	GWAS	Taiwanese Han - psychomotor-insight (SSRI)	421	rs1272261	ZNF503
Huang et al., 2023	36658263	% symptom change	GWAS	Taiwanese Han - total (SSRI)	421	rs111318924	/
Huang et al., 2023	36658263	% symptom change	GWAS	Taiwanese Han - insomnia (SSRI)	421	rs1240489101	/
Huang et al., 2023	36658263	% symptom change	GWAS	Taiwanese Han - total (SSRI)	421	rs12554900	/
Huang et al., 2023	36658263	% symptom change	GWAS	Taiwanese Han - total (SSRI)	421	rs12582436	/
Huang et al., 2023	36658263	% symptom change	GWAS	Taiwanese Han - anorexia	421	rs12959607	/
Huang et al., 2023	36658263	% symptom change	GWAS	Taiwanese Han - anorexia	421	rs16910234	/
Huang et al., 2023	36658263	% symptom change	GWAS	Taiwanese Han - psychomotor-insight (SSRI)	421	rs17079143	/
Huang et al., 2023	36658263	% symptom change	GWAS	Taiwanese Han - insomnia (SSRI)	421	rs1817145542	/
Huang et al., 2023	36658263	% symptom change	GWAS	Taiwanese Han - insomnia (SSRI)	421	rs1845724693	/
Huang et al., 2023	36658263	% symptom change	GWAS	Taiwanese Han - core (SSRI)	421	rs2182717	/
Huang et al., 2023	36658263	% symptom change	GWAS	Taiwanese Han - psychomotor-insight (SSRI)	421	rs58540698	/
Huang et al., 2023	36658263	% symptom change	GWAS	Taiwanese Han - somatic anxiety (SSRI)	421	rs59704095	/
Huang et al., 2023	36658263	% symptom change	GWAS	Taiwanese Han - core (SSRI)	421	rs79339849	/
Huang et al., 2023	36658263	AD response	GWAS	Taiwanese Han - total (SSRI)	421	rs3814382	ABCB11
Huang et al., 2023	36658263	AD response	GWAS	Taiwanese Han - core (SSRI)	421	rs3091574	ARFGEF2
Huang et al., 2023	36658263	AD response	GWAS	Taiwanese Han - psychomotor-insight (SSRI)	421	rs9661996	C8B
Huang et al., 2023	36658263	AD response	GWAS	Taiwanese Han - somatic anxiety (SSRI)	421	rs11160241	CLMN
Huang et al., 2023	36658263	AD response	GWAS	Taiwanese Han - core (SSRI)	421	rs199859125	DHRS9
Huang et al., 2023	36658263	AD response	GWAS	Taiwanese Han - anorexia (SSRI)	421	rs57713956	DNAH17
Huang et al., 2023	36658263	AD response	GWAS	Taiwanese Han - psychomotor-insight (SSRI)	421	rs2840183	GRM3
Huang et al., 2023	36658263	AD response	GWAS	Taiwanese Han - core (SSRI)	421	rs6919620	LOC105374898
Huang et al., 2023	36658263	AD response	GWAS	Taiwanese Han - total (SSRI)	421	rs9966699	MYO5B
Huang et al., 2023	36658263	AD response	GWAS	Taiwanese Han - somatic anxiety (SSRI)	421	rs9649262	RELN
Huang et al., 2023	36658263	AD response	GWAS	Taiwanese Han - insomnia (SSRI)	421	rs527518382	SNTB1
Huang et al., 2023	36658263	AD response	GWAS	Taiwanese Han - anorexia (SSRI)	421	rs10219715	/
Huang et al., 2023	36658263	AD response	GWAS	Taiwanese Han - insomnia (SSRI)	421	rs11759993	/
Huang et al., 2023	36658263	AD response	GWAS	Taiwanese Han - anorexia (SSRI)	421	rs12534619	/
Huang et al., 2023	36658263	AD response	GWAS	Taiwanese Han - insomnia (SSRI)	421	rs1450035	/
Huang et al., 2023	36658263	AD response	GWAS	Taiwanese Han - psychomotor-insight (SSRI)	421	rs181485495	/
Huang et al., 2023	36658263	AD response	GWAS	Taiwanese Han - total (SSRI)	421	rs78807474	/
Pain et al., 2022	35712048	AD remission	GWAS	GSRD, STAR*D, GENDEP, 7 others	5151	rs1807204	ARL4D(-38.5),MIR2117HG(0.0),MIR2117(0.0),DHX8(0.0),ETV4(0.0)
Pain et al., 2022	35712048	AD remission	GWAS	GSRD, STAR*D, GENDEP, 7 others	5151	rs11302946	B4GALNT3(0.0)
Pain et al., 2022	35712048	AD remission	GWAS	GSRD, STAR*D, GENDEP, 7 others	5151	rs3976883	CBWD2(0.0),FOXD4L1(0.0),PGM5P3-AS1(11.0),PGM5P4-AS1(12.1),PGM5P4(23.0)
Pain et al., 2022	35712048	AD remission	GWAS	GSRD, STAR*D, GENDEP, 7 others	5151	rs141235407	DTX1(-37.4),RASAL1(0.0),CFAP73(0.0),DDX54(0.0),MIR7106(0.0),RITA1(0.0),IQCD(0.0),TPCN1(0.0)
Pain et al., 2022	35712048	AD remission	GWAS	GSRD, STAR*D, GENDEP, 7 others	5151	rs10968196	LINGO2(0.0)
Pain et al., 2022	35712048	AD remission	GWAS	GSRD, STAR*D, GENDEP, 7 others	5151	rs545208792	MYT1L(0.0)
Pain et al., 2022	35712048	AD remission	GWAS	GSRD, STAR*D, GENDEP, 7 others	5151	rs7567724	RPS7(0.0),COLEC11(0.0),ALLC(0.0)
Pain et al., 2022	35712048	AD remission	GWAS	GSRD, STAR*D, GENDEP, 7 others	5151	rs34170867	SAMD12(0.0)
Pain et al., 2022	35712048	AD remission	GWAS	GSRD, STAR*D, GENDEP, 7 others	5151	rs3900596	TMEM56(0.0),TMEM56-RWDD3(0.0),LOC101928118(0.0),RWDD3(30.2),LINC01760(106.9)
Pain et al., 2022	35712048	AD remission	GWAS	3 asian cohorts	427	-	-
Fabbri et al., 2021	33753889	TRD vs non-TRD	GWAS	UKB	16372	rs76617142	SATB1-AS1
Fabbri et al., 2021	33753889	TRD vs non-TRD	GWAS	UKB	16372	rs61904805	AP001891,1
Fabbri et al., 2021	33753889	TRD vs non-TRD	GWAS	UKB	16372	rs78339301	ARL14EP
Fabbri et al., 2021	33753889	TRD vs non-TRD	GWAS	UKB	16372	rs79834175	ATP6V0E1
Fabbri et al., 2021	33753889	TRD vs non-TRD	GWAS	UKB	16372	rs6565595	C17orf70
Fabbri et al., 2021	33753889	TRD vs non-TRD	GWAS	UKB	16372	rs7207933	C17orf70
Fabbri et al., 2021	33753889	TRD vs non-TRD	GWAS	UKB	16372	rs7213717	C17orf70
Fabbri et al., 2021	33753889	TRD vs non-TRD	GWAS	UKB	16372	rs74530133	C17orf70
Fabbri et al., 2021	33753889	TRD vs non-TRD	GWAS	UKB	16372	rs56093609	CDKAL1
Fabbri et al., 2021	33753889	TRD vs non-TRD	GWAS	UKB	16372	rs1769181	CHRM3
Fabbri et al., 2021	33753889	TRD vs non-TRD	GWAS	UKB	16372	rs1934349	CHRM3
Fabbri et al., 2021	33753889	TRD vs non-TRD	GWAS	UKB	16372	rs4463655	CHRM3
Fabbri et al., 2021	33753889	TRD vs non-TRD	GWAS	UKB	16372	rs6429160	CHRM3
Fabbri et al., 2021	33753889	TRD vs non-TRD	GWAS	UKB	16372	rs1147165	CTC-458G6,2
Fabbri et al., 2021	33753889	TRD vs non-TRD	GWAS	UKB	16372	rs187057	CTC-458G6,2
Fabbri et al., 2021	33753889	TRD vs non-TRD	GWAS	UKB	16372	rs350800	CTC-458G6,2
Fabbri et al., 2021	33753889	TRD vs non-TRD	GWAS	UKB	16372	rs350801	CTC-458G6,2
Fabbri et al., 2021	33753889	TRD vs non-TRD	GWAS	UKB	16372	rs350802	CTC-458G6,2
Fabbri et al., 2021	33753889	TRD vs non-TRD	GWAS	UKB	16372	rs350803	CTC-458G6,2
Fabbri et al., 2021	33753889	TRD vs non-TRD	GWAS	UKB	16372	rs74815160	CTD-2349P21,1
Fabbri et al., 2021	33753889	TRD vs non-TRD	GWAS	UKB	16372	rs55985402	CTD-2532D12,5
Fabbri et al., 2021	33753889	TRD vs non-TRD	GWAS	UKB	16372	rs4960705	DPP6
Fabbri et al., 2021	33753889	TRD vs non-TRD	GWAS	UKB	16372	rs144495474	FSHB
Fabbri et al., 2021	33753889	TRD vs non-TRD	GWAS	UKB	16372	rs1493489	GRIP1
Fabbri et al., 2021	33753889	TRD vs non-TRD	GWAS	UKB	16372	rs2131596	GRIP1
Fabbri et al., 2021	33753889	TRD vs non-TRD	GWAS	UKB	16372	rs4362212	GRIP1
Fabbri et al., 2021	33753889	TRD vs non-TRD	GWAS	UKB	16372	rs149457990	IGBP1P5
Fabbri et al., 2021	33753889	TRD vs non-TRD	GWAS	UKB	16372	rs201721436	LOC105375639
Fabbri et al., 2021	33753889	TRD vs non-TRD	GWAS	UKB	16372	4:151699124_CAAA_C	LRBA
Fabbri et al., 2021	33753889	TRD vs non-TRD	GWAS	UKB	16372	rs117497020	MAP3K7
Fabbri et al., 2021	33753889	TRD vs non-TRD	GWAS	UKB	16372	rs113246227	MCM5
Fabbri et al., 2021	33753889	TRD vs non-TRD	GWAS	UKB	16372	rs4519713	NAALADL2
Fabbri et al., 2021	33753889	TRD vs non-TRD	GWAS	UKB	16372	20:342643_TA_T	NRSN2
Fabbri et al., 2021	33753889	TRD vs non-TRD	GWAS	UKB	16372	rs147081653	NRSN2
Fabbri et al., 2021	33753889	TRD vs non-TRD	GWAS	UKB	16372	rs147270579	NRSN2
Fabbri et al., 2021	33753889	TRD vs non-TRD	GWAS	UKB	16372	rs76686854	NRSN2
Fabbri et al., 2021	33753889	TRD vs non-TRD	GWAS	UKB	16372	rs78298378	NRSN2
Fabbri et al., 2021	33753889	TRD vs non-TRD	GWAS	UKB	16372	rs55821194	PDXK
Fabbri et al., 2021	33753889	TRD vs non-TRD	GWAS	UKB	16372	rs116979514	PRDM11
Fabbri et al., 2021	33753889	TRD vs non-TRD	GWAS	UKB	16372	rs148016647	PRG3
Fabbri et al., 2021	33753889	TRD vs non-TRD	GWAS	UKB	16372	rs78546238	PWRN4
Fabbri et al., 2021	33753889	TRD vs non-TRD	GWAS	UKB	16372	rs565448776	RN7SKP182
Fabbri et al., 2021	33753889	TRD vs non-TRD	GWAS	UKB	16372	3:137147143_TA_T	RNA5SP142
Fabbri et al., 2021	33753889	TRD vs non-TRD	GWAS	UKB	16372	rs115633075	RNA5SP142
Fabbri et al., 2021	33753889	TRD vs non-TRD	GWAS	UKB	16372	rs12485887	RNA5SP142
Fabbri et al., 2021	33753889	TRD vs non-TRD	GWAS	UKB	16372	rs12489530	RNA5SP142
Fabbri et al., 2021	33753889	TRD vs non-TRD	GWAS	UKB	16372	rs12490164	RNA5SP142
Fabbri et al., 2021	33753889	TRD vs non-TRD	GWAS	UKB	16372	rs12490219	RNA5SP142
Fabbri et al., 2021	33753889	TRD vs non-TRD	GWAS	UKB	16372	rs199707301	RNA5SP142
Fabbri et al., 2021	33753889	TRD vs non-TRD	GWAS	UKB	16372	rs370542060	RNA5SP142
Fabbri et al., 2021	33753889	TRD vs non-TRD	GWAS	UKB	16372	rs4342059	RNA5SP142
Fabbri et al., 2021	33753889	TRD vs non-TRD	GWAS	UKB	16372	rs4396827	RNA5SP142
Fabbri et al., 2021	33753889	TRD vs non-TRD	GWAS	UKB	16372	rs4476458	RNA5SP142
Fabbri et al., 2021	33753889	TRD vs non-TRD	GWAS	UKB	16372	rs4536769	RNA5SP142
Fabbri et al., 2021	33753889	TRD vs non-TRD	GWAS	UKB	16372	rs58350491	RNA5SP142
Fabbri et al., 2021	33753889	TRD vs non-TRD	GWAS	UKB	16372	rs59120530	RNA5SP142
Fabbri et al., 2021	33753889	TRD vs non-TRD	GWAS	UKB	16372	rs73863961	RNA5SP142
Fabbri et al., 2021	33753889	TRD vs non-TRD	GWAS	UKB	16372	rs7431514	RNA5SP142
Fabbri et al., 2021	33753889	TRD vs non-TRD	GWAS	UKB	16372	rs752299813	RNA5SP142
Fabbri et al., 2021	33753889	TRD vs non-TRD	GWAS	UKB	16372	rs755232584	RNA5SP142
Fabbri et al., 2021	33753889	TRD vs non-TRD	GWAS	UKB	16372	rs7633165	RNA5SP142
Fabbri et al., 2021	33753889	TRD vs non-TRD	GWAS	UKB	16372	rs776682966	RNA5SP142
Fabbri et al., 2021	33753889	TRD vs non-TRD	GWAS	UKB	16372	rs564958966	RNA5SP99
Fabbri et al., 2021	33753889	TRD vs non-TRD	GWAS	UKB	16372	rs571956382	RNA5SP99
Fabbri et al., 2021	33753889	TRD vs non-TRD	GWAS	UKB	16372	rs62153281	RNA5SP99
Fabbri et al., 2021	33753889	TRD vs non-TRD	GWAS	UKB	16372	rs569128897	RNU7-147P
Fabbri et al., 2021	33753889	TRD vs non-TRD	GWAS	UKB	16372	rs140192346	RNY4P16
Fabbri et al., 2021	33753889	TRD vs non-TRD	GWAS	UKB	16372	rs116949009	RP11-324F11,1
Fabbri et al., 2021	33753889	TRD vs non-TRD	GWAS	UKB	16372	rs782174599	RP11-421E17,4
Fabbri et al., 2021	33753889	TRD vs non-TRD	GWAS	UKB	16372	rs11117364	RP11-863P13,4
Fabbri et al., 2021	33753889	TRD vs non-TRD	GWAS	UKB	16372	rs13078081	RPL21P41
Fabbri et al., 2021	33753889	TRD vs non-TRD	GWAS	UKB	16372	rs8010048	SCFD1
Fabbri et al., 2021	33753889	TRD vs non-TRD	GWAS	UKB	16372	rs575490301	snoU13
Fabbri et al., 2021	33753889	TRD vs non-TRD	GWAS	UKB	16372	rs56691960	SPSB1
Fabbri et al., 2021	33753889	TRD vs non-TRD	GWAS	UKB	16372	rs117136231	SS18L1
Fabbri et al., 2021	33753889	TRD vs non-TRD	GWAS	UKB	16372	rs140030682	TBX19
Fabbri et al., 2021	33753889	TRD vs non-TRD	GWAS	UKB	16372	2:137053739_CT_C	UBBP1
Fabbri et al., 2021	33753889	TRD vs non-TRD	GWAS	UKB	16372	rs11683082	TBX19
Fabbri et al., 2021	33753889	TRD vs non-TRD	GWAS	UKB	16372	rs11685088	UBBP1
Fabbri et al., 2021	33753889	TRD vs non-TRD	GWAS	UKB	16372	rs1476777073	UBBP1
Fabbri et al., 2021	33753889	TRD vs non-TRD	GWAS	UKB	16372	rs186910289	UBBP1
Fabbri et al., 2021	33753889	TRD vs non-TRD	GWAS	UKB	16372	rs76262309	UBBP1
Fabbri et al., 2021	33753889	TRD vs non-TRD	GWAS	UKB	16372	rs77346794	UBBP1
Li et al., 2020	33106475	SSRI response	GWAS	23andMe AES	12477	rs4884091	RNF219-AS1
Li et al., 2020	33106475	SSRI response	Meta-analysis of GWAS	23andMe AES, AESES	19740	rs4884091	RNF219-AS1; eQTL
Li et al., 2020	33106475	SNRI response	Meta-analysis of GWAS	23andMe AES, AESES	7079	rs4955665	MECOM
Li et al., 2020	33106475	TRD	Meta-analysis of GWAS	23andMe AES, AESES	25506	rs150245813	ENSG00000226113
Wigmore et al., 2020	30700811	AD response (stage of resistance)	GWAS	GS:SFHS	3452	rs182041872	(ACADSB–HMX3)
Wigmore et al., 2020	30700811	AD response (stage of resistance)	GWAS	GS:SFHS	3452	rs188352979	(ACADSB–HMX3)
Wigmore et al., 2020	30700811	AD response (stage of resistance)	GWAS	GS:SFHS	3452	rs116902282	(C10orf35–COL13A1)
Wigmore et al., 2020	30700811	AD response (stage of resistance)	GWAS	GS:SFHS	3452	rs4400118	(DNAH5–TRIO)
Wigmore et al., 2020	30700811	TRD	Meta-analysis of GWAS	GS:SFHS, GENDEP	4213	rs188352979	(ACADSB–HMX3)
Wigmore et al., 2020	30700811	TRD	Meta-analysis of GWAS	GS:SFHS, GENDEP	4213	rs138583130	(CNTN1)
Wigmore et al., 2020	30700811	TRD	Meta-analysis of GWAS	GS:SFHS, GENDEP	4213	rs145842949	(MON1B)
Wigmore et al., 2020	30700811	TRD	Meta-analysis of GWAS	GS:SFHS, GENDEP	4213	rs111968111	(SRPK1–SLC26A8)
Fabbri et al., 2019	30468137	TRD vs response	GWAS	GSRD	759	rs12643347	CCSER1
Fabbri et al., 2019	30468137	TRD vs response	GWAS	GSRD	759	rs4133271	CCSER1
Fabbri et al., 2019	30468137	TRD vs response	GWAS	GSRD	759	rs60032550	CCSER1
Fabbri et al., 2019	30468137	TRD vs response	GWAS	GSRD	759	rs6532337	CCSER1
Fabbri et al., 2019	30468137	TRD vs response	GWAS	GSRD	759	rs6817841	CCSER1
Fabbri et al., 2019	30468137	TRD vs response	GWAS	GSRD	759	rs73837955	CCSER1
Fabbri et al., 2019	30468137	TRD vs response	GWAS	GSRD	759	rs73837957	CCSER1
Fabbri et al., 2019	30468137	TRD vs response	GWAS	GSRD	759	rs74475140	CCSER1
Fabbri et al., 2019	30468137	TRD vs response	GWAS	GSRD	759	rs7679930	CCSER1
Fabbri et al., 2019	30468137	TRD vs response	GWAS	GSRD	759	rs9895559	CTC-281F24.2
Fabbri et al., 2019	30468137	TRD vs response	Meta-analysis of GWAS	GSRD, STAR*D, GENDEP	2214	rs75528495	EPHB1
Fabbri et al., 2019	30468137	TRD vs response	GWAS	GSRD	759	rs12745534	HIVEP3
Fabbri et al., 2019	30468137	TRD vs response	GWAS	GSRD	759	rs7523641	HIVEP3
Fabbri et al., 2019	30468137	TRD vs response	GWAS	GSRD	759	rs242999	LL22NC03-86D4.1
Fabbri et al., 2019	30468137	TRD vs response	GWAS	GSRD	759	rs80080484	RP11-41O4.3
Fabbri et al., 2019	30468137	TRD vs response	Meta-analysis of GWAS	GSRD, STAR*D, GENDEP	2214	rs10918445	RP11-479J7.1
Fabbri et al., 2019	30468137	TRD vs response	Meta-analysis of GWAS	GSRD, STAR*D, GENDEP	2214	rs56305552	SOX13
Fabbri et al., 2019	30468137	TRD vs response	GWAS	GSRD	759	rs12564480	WDR64
Fabbri et al., 2019	30468137	TRD vs response	GWAS	GSRD	759	rs10460951	ZNF385D-AS1
Fabbri et al., 2019	30468137	TRD vs response	GWAS	GSRD	759	rs11919873	ZNF385D-AS1
Fabbri et al., 2019	30468137	TRD vs response	GWAS	GSRD	759	rs13072036	ZNF385D-AS1
Fabbri et al., 2019	30468137	TRD vs response	GWAS	GSRD	759	rs1457582	ZNF385D-AS1
Fabbri et al., 2019	30468137	TRD vs response	GWAS	GSRD	759	rs1478067	ZNF385D-AS1
Fabbri et al., 2019	30468137	TRD vs response	GWAS	GSRD	759	rs1841915	ZNF385D-AS1
Fabbri et al., 2019	30468137	TRD vs response	GWAS	GSRD	759	rs1871106	ZNF385D-AS1
Fabbri et al., 2019	30468137	TRD vs response	GWAS	GSRD	759	rs1960582	ZNF385D-AS1
Fabbri et al., 2019	30468137	TRD vs response	GWAS	GSRD	759	rs3860581	ZNF385D-AS1
Fabbri et al., 2019	30468137	TRD vs response	GWAS	GSRD	759	rs3911494	ZNF385D-AS1
Fabbri et al., 2019	30468137	TRD vs response	GWAS	GSRD	759	rs3965331	ZNF385D-AS1
Fabbri et al., 2019	30468137	TRD vs response	GWAS	GSRD	759	rs4858331	ZNF385D-AS1
Fabbri et al., 2019	30468137	TRD vs response	GWAS	GSRD	759	rs4858332	ZNF385D-AS1
Fabbri et al., 2019	30468137	TRD vs response	GWAS	GSRD	759	rs4858333	ZNF385D-AS1
Fabbri et al., 2019	30468137	TRD vs response	GWAS	GSRD	759	rs7613175	ZNF385D-AS1
Fabbri et al., 2019	30468137	TRD vs response	GWAS	GSRD	759	rs7616732	ZNF385D-AS1
Fabbri et al., 2019	30468137	TRD vs response	GWAS	GSRD	759	rs7620851	ZNF385D-AS1
Fabbri et al., 2019	30468137	TRD vs response	GWAS	GSRD	759	rs7626779	ZNF385D-AS1
Fabbri et al., 2019	30468137	TRD vs response	GWAS	GSRD	759	rs7636804	ZNF385D-AS1
Fabbri et al., 2019	30468137	TRD vs response	GWAS	GSRD	759	rs7637584	ZNF385D-AS1
Fabbri et al., 2019	30468137	TRD vs response	GWAS	GSRD	759	rs7650823	ZNF385D-AS1
Fabbri et al., 2019	30468137	TRD vs response	Meta-analysis of GWAS	GSRD, STAR*D, GENDEP	2214	rs886266	ZNF530
Fabbri et al., 2019	30468137	TRD vs response	Meta-analysis of GWAS	GSRD, STAR*D, GENDEP	2214	rs12460048	ZNF549
Fabbri et al., 2019	30468137	TRD vs response	Meta-analysis of GWAS	GSRD, STAR*D, GENDEP	2214	rs1859070	ZNF549
Fabbri et al., 2019	30468137	TRD vs response (improvement)	GWAS	GSRD	759	rs144150047	AL645819.1
Fabbri et al., 2019	30468137	TRD vs response (improvement)	Meta-analysis of GWAS	GSRD, STAR*D, GENDEP	2214	rs148880478	ANKRD31
Fabbri et al., 2019	30468137	TRD vs response (improvement)	GWAS	GSRD	759	rs10514108	ARSB
Fabbri et al., 2019	30468137	TRD vs response (improvement)	GWAS	GSRD	759	rs67145712	ARSB
Fabbri et al., 2019	30468137	TRD vs response (improvement)	Meta-analysis of GWAS	GSRD, STAR*D, GENDEP	2214	rs2239037	CACNA1C
Fabbri et al., 2019	30468137	TRD vs response (improvement)	Meta-analysis of GWAS	GSRD, STAR*D, GENDEP	2214	rs149233695	CAMKMT
Fabbri et al., 2019	30468137	TRD vs response (improvement)	GWAS	GSRD	759	rs12643347	CCSER1
Fabbri et al., 2019	30468137	TRD vs response (improvement)	GWAS	GSRD	759	rs148050386	CCSER1
Fabbri et al., 2019	30468137	TRD vs response (improvement)	GWAS	GSRD	759	rs2176310	CCSER1
Fabbri et al., 2019	30468137	TRD vs response (improvement)	GWAS	GSRD	759	rs4133271	CCSER1
Fabbri et al., 2019	30468137	TRD vs response (improvement)	GWAS	GSRD	759	rs60032550	CCSER1
Fabbri et al., 2019	30468137	TRD vs response (improvement)	GWAS	GSRD	759	rs6532337	CCSER1
Fabbri et al., 2019	30468137	TRD vs response (improvement)	GWAS	GSRD	759	rs6817841	CCSER1
Fabbri et al., 2019	30468137	TRD vs response (improvement)	GWAS	GSRD	759	rs73837955	CCSER1
Fabbri et al., 2019	30468137	TRD vs response (improvement)	GWAS	GSRD	759	rs73837957	CCSER1
Fabbri et al., 2019	30468137	TRD vs response (improvement)	GWAS	GSRD	759	rs74475140	CCSER1
Fabbri et al., 2019	30468137	TRD vs response (improvement)	GWAS	GSRD	759	rs7679930	CCSER1
Fabbri et al., 2019	30468137	TRD vs response (improvement)	Meta-analysis of GWAS	GSRD, STAR*D, GENDEP	2214	rs117330006	CDK14
Fabbri et al., 2019	30468137	TRD vs response (improvement)	Meta-analysis of GWAS	GSRD, STAR*D, GENDEP	2214	rs12160621	CTA-796E4.3
Fabbri et al., 2019	30468137	TRD vs response (improvement)	Meta-analysis of GWAS	GSRD, STAR*D, GENDEP	2214	rs12160925	CTA-796E4.3
Fabbri et al., 2019	30468137	TRD vs response (improvement)	Meta-analysis of GWAS	GSRD, STAR*D, GENDEP	2214	rs6004948	CTA-796E4.3
Fabbri et al., 2019	30468137	TRD vs response (improvement)	GWAS	GSRD	759	rs188509130	DPY19L1P1
Fabbri et al., 2019	30468137	TRD vs response (improvement)	Meta-analysis of GWAS	GSRD, STAR*D, GENDEP	2214	rs112093877	EGLN3
Fabbri et al., 2019	30468137	TRD vs response (improvement)	GWAS	GSRD	759	rs72865845	EVPL
Fabbri et al., 2019	30468137	TRD vs response (improvement)	Meta-analysis of GWAS	GSRD, STAR*D, GENDEP	2214	rs141641934	GALNT18
Fabbri et al., 2019	30468137	TRD vs response (improvement)	Meta-analysis of GWAS	GSRD, STAR*D, GENDEP	2214	rs13064922	KCNMB2: RP11-385J1.2
Fabbri et al., 2019	30468137	TRD vs response (improvement)	Meta-analysis of GWAS	GSRD, STAR*D, GENDEP	2214	rs13077058	KCNMB2: RP11-385J1.2
Fabbri et al., 2019	30468137	TRD vs response (improvement)	Meta-analysis of GWAS	GSRD, STAR*D, GENDEP	2214	rs1382043	KCNMB2: RP11-385J1.2
Fabbri et al., 2019	30468137	TRD vs response (improvement)	Meta-analysis of GWAS	GSRD, STAR*D, GENDEP	2214	rs1382044	KCNMB2: RP11-385J1.2
Fabbri et al., 2019	30468137	TRD vs response (improvement)	Meta-analysis of GWAS	GSRD, STAR*D, GENDEP	2214	rs1382045	KCNMB2: RP11-385J1.2
Fabbri et al., 2019	30468137	TRD vs response (improvement)	Meta-analysis of GWAS	GSRD, STAR*D, GENDEP	2214	rs1477768	KCNMB2: RP11-385J1.2
Fabbri et al., 2019	30468137	TRD vs response (improvement)	Meta-analysis of GWAS	GSRD, STAR*D, GENDEP	2214	rs1477786	KCNMB2: RP11-385J1.2
Fabbri et al., 2019	30468137	TRD vs response (improvement)	Meta-analysis of GWAS	GSRD, STAR*D, GENDEP	2214	rs2035177	KCNMB2: RP11-385J1.2
Fabbri et al., 2019	30468137	TRD vs response (improvement)	Meta-analysis of GWAS	GSRD, STAR*D, GENDEP	2214	rs2054399	KCNMB2: RP11-385J1.2
Fabbri et al., 2019	30468137	TRD vs response (improvement)	Meta-analysis of GWAS	GSRD, STAR*D, GENDEP	2214	rs2126687	KCNMB2: RP11-385J1.2
Fabbri et al., 2019	30468137	TRD vs response (improvement)	Meta-analysis of GWAS	GSRD, STAR*D, GENDEP	2214	rs2902434	KCNMB2: RP11-385J1.2
Fabbri et al., 2019	30468137	TRD vs response (improvement)	Meta-analysis of GWAS	GSRD, STAR*D, GENDEP	2214	rs6443554	KCNMB2: RP11-385J1.2
Fabbri et al., 2019	30468137	TRD vs response (improvement)	Meta-analysis of GWAS	GSRD, STAR*D, GENDEP	2214	rs7613009	KCNMB2: RP11-385J1.2
Fabbri et al., 2019	30468137	TRD vs response (improvement)	Meta-analysis of GWAS	GSRD, STAR*D, GENDEP	2214	rs7619083	KCNMB2: RP11-385J1.2
Fabbri et al., 2019	30468137	TRD vs response (improvement)	Meta-analysis of GWAS	GSRD, STAR*D, GENDEP	2214	rs9874283	KCNMB2: RP11-385J1.2
Fabbri et al., 2019	30468137	TRD vs response (improvement)	GWAS	GSRD	759	rs8086741	LDLRAD4
Fabbri et al., 2019	30468137	TRD vs response (improvement)	Meta-analysis of GWAS	GSRD, STAR*D, GENDEP	2214	rs8086741	LDLRAD4
Fabbri et al., 2019	30468137	TRD vs response (improvement)	GWAS	GSRD	759	rs8099805	LDLRAD4
Fabbri et al., 2019	30468137	TRD vs response (improvement)	Meta-analysis of GWAS	GSRD, STAR*D, GENDEP	2214	rs8099805	LDLRAD4
Fabbri et al., 2019	30468137	TRD vs response (improvement)	Meta-analysis of GWAS	GSRD, STAR*D, GENDEP	2214	rs77472828	LINC00371
Fabbri et al., 2019	30468137	TRD vs response (improvement)	GWAS	GSRD	759	rs952614	LINC00676
Fabbri et al., 2019	30468137	TRD vs response (improvement)	GWAS	GSRD	759	rs1541314	MUC5B
Fabbri et al., 2019	30468137	TRD vs response (improvement)	GWAS	GSRD	759	rs2075855	MUC5B
Fabbri et al., 2019	30468137	TRD vs response (improvement)	GWAS	GSRD	759	rs2735711	MUC5B
Fabbri et al., 2019	30468137	TRD vs response (improvement)	GWAS	GSRD	759	rs2735721	MUC5B
Fabbri et al., 2019	30468137	TRD vs response (improvement)	GWAS	GSRD	759	rs2943513	MUC5B
Fabbri et al., 2019	30468137	TRD vs response (improvement)	GWAS	GSRD	759	rs3021155	MUC5B
Fabbri et al., 2019	30468137	TRD vs response (improvement)	GWAS	GSRD	759	rs3021156	MUC5B
Fabbri et al., 2019	30468137	TRD vs response (improvement)	Meta-analysis of GWAS	GSRD, STAR*D, GENDEP	2214	rs55991223	PLCH1
Fabbri et al., 2019	30468137	TRD vs response (improvement)	Meta-analysis of GWAS	GSRD, STAR*D, GENDEP	2214	rs144693124	RBCK1
Fabbri et al., 2019	30468137	TRD vs response (improvement)	GWAS	GSRD	759	rs112534819	RN7SL383P
Fabbri et al., 2019	30468137	TRD vs response (improvement)	Meta-analysis of GWAS	GSRD, STAR*D, GENDEP	2214	rs10872660	RNU4-7P
Fabbri et al., 2019	30468137	TRD vs response (improvement)	Meta-analysis of GWAS	GSRD, STAR*D, GENDEP	2214	rs10506787	RP11-171L9.1
Fabbri et al., 2019	30468137	TRD vs response (improvement)	GWAS	GSRD	759	rs10860592	RP11-171L9.1
Fabbri et al., 2019	30468137	TRD vs response (improvement)	Meta-analysis of GWAS	GSRD, STAR*D, GENDEP	2214	rs10860592	RP11-171L9.1
Fabbri et al., 2019	30468137	TRD vs response (improvement)	Meta-analysis of GWAS	GSRD, STAR*D, GENDEP	2214	rs10860616	RP11-171L9.1
Fabbri et al., 2019	30468137	TRD vs response (improvement)	Meta-analysis of GWAS	GSRD, STAR*D, GENDEP	2214	rs11110343	RP11-171L9.1
Fabbri et al., 2019	30468137	TRD vs response (improvement)	Meta-analysis of GWAS	GSRD, STAR*D, GENDEP	2214	rs11110435	RP11-171L9.1
Fabbri et al., 2019	30468137	TRD vs response (improvement)	Meta-analysis of GWAS	GSRD, STAR*D, GENDEP	2214	rs11110452	RP11-171L9.1
Fabbri et al., 2019	30468137	TRD vs response (improvement)	Meta-analysis of GWAS	GSRD, STAR*D, GENDEP	2214	rs11110503	RP11-171L9.1
Fabbri et al., 2019	30468137	TRD vs response (improvement)	Meta-analysis of GWAS	GSRD, STAR*D, GENDEP	2214	rs11834414	RP11-171L9.1
Fabbri et al., 2019	30468137	TRD vs response (improvement)	Meta-analysis of GWAS	GSRD, STAR*D, GENDEP	2214	rs12371969	RP11-171L9.1
Fabbri et al., 2019	30468137	TRD vs response (improvement)	Meta-analysis of GWAS	GSRD, STAR*D, GENDEP	2214	rs1357096	RP11-171L9.1
Fabbri et al., 2019	30468137	TRD vs response (improvement)	Meta-analysis of GWAS	GSRD, STAR*D, GENDEP	2214	rs1717332	RP11-171L9.1
Fabbri et al., 2019	30468137	TRD vs response (improvement)	Meta-analysis of GWAS	GSRD, STAR*D, GENDEP	2214	rs17175418	RP11-171L9.1
Fabbri et al., 2019	30468137	TRD vs response (improvement)	Meta-analysis of GWAS	GSRD, STAR*D, GENDEP	2214	rs17254690	RP11-171L9.1
Fabbri et al., 2019	30468137	TRD vs response (improvement)	Meta-analysis of GWAS	GSRD, STAR*D, GENDEP	2214	rs17254816	RP11-171L9.1
Fabbri et al., 2019	30468137	TRD vs response (improvement)	Meta-analysis of GWAS	GSRD, STAR*D, GENDEP	2214	rs1796128	RP11-171L9.1
Fabbri et al., 2019	30468137	TRD vs response (improvement)	Meta-analysis of GWAS	GSRD, STAR*D, GENDEP	2214	rs55656413	RP11-171L9.1
Fabbri et al., 2019	30468137	TRD vs response (improvement)	Meta-analysis of GWAS	GSRD, STAR*D, GENDEP	2214	rs73140530	RP11-171L9.1
Fabbri et al., 2019	30468137	TRD vs response (improvement)	Meta-analysis of GWAS	GSRD, STAR*D, GENDEP	2214	rs80182957	RP11-344L13.2
Fabbri et al., 2019	30468137	TRD vs response (improvement)	Meta-analysis of GWAS	GSRD, STAR*D, GENDEP	2214	rs76858354	RP11-418J17.3
Fabbri et al., 2019	30468137	TRD vs response (improvement)	Meta-analysis of GWAS	GSRD, STAR*D, GENDEP	2214	rs2881026	RP11-476K15.1
Fabbri et al., 2019	30468137	TRD vs response (improvement)	Meta-analysis of GWAS	GSRD, STAR*D, GENDEP	2214	rs7243011	RP11-476K15.1
Fabbri et al., 2019	30468137	TRD vs response (improvement)	Meta-analysis of GWAS	GSRD, STAR*D, GENDEP	2214	rs8091192	RP11-476K15.1
Fabbri et al., 2019	30468137	TRD vs response (improvement)	GWAS	GSRD	759	rs10814395	RP11-509J21.1
Fabbri et al., 2019	30468137	TRD vs response (improvement)	GWAS	GSRD	759	rs1334063	RP11-509J21.1
Fabbri et al., 2019	30468137	TRD vs response (improvement)	Meta-analysis of GWAS	GSRD, STAR*D, GENDEP	2214	rs11034800	RP11-63D14.1
Fabbri et al., 2019	30468137	TRD vs response (improvement)	Meta-analysis of GWAS	GSRD, STAR*D, GENDEP	2214	rs11034801	RP11-63D14.1
Fabbri et al., 2019	30468137	TRD vs response (improvement)	Meta-analysis of GWAS	GSRD, STAR*D, GENDEP	2214	rs12271898	RP11-63D14.1
Fabbri et al., 2019	30468137	TRD vs response (improvement)	Meta-analysis of GWAS	GSRD, STAR*D, GENDEP	2214	rs112944669	RP11-735G4.1
Fabbri et al., 2019	30468137	TRD vs response (improvement)	Meta-analysis of GWAS	GSRD, STAR*D, GENDEP	2214	rs11963130	RP11-735G4.1
Fabbri et al., 2019	30468137	TRD vs response (improvement)	Meta-analysis of GWAS	GSRD, STAR*D, GENDEP	2214	rs17053096	RP11-735G4.1
Fabbri et al., 2019	30468137	TRD vs response (improvement)	Meta-analysis of GWAS	GSRD, STAR*D, GENDEP	2214	rs56226457	RP11-735G4.1
Fabbri et al., 2019	30468137	TRD vs response (improvement)	Meta-analysis of GWAS	GSRD, STAR*D, GENDEP	2214	rs58919908	RP11-735G4.1
Fabbri et al., 2019	30468137	TRD vs response (improvement)	Meta-analysis of GWAS	GSRD, STAR*D, GENDEP	2214	rs59050393	RP11-735G4.1
Fabbri et al., 2019	30468137	TRD vs response (improvement)	Meta-analysis of GWAS	GSRD, STAR*D, GENDEP	2214	rs60028154	RP11-735G4.1
Fabbri et al., 2019	30468137	TRD vs response (improvement)	Meta-analysis of GWAS	GSRD, STAR*D, GENDEP	2214	rs61611660	RP11-735G4.1
Fabbri et al., 2019	30468137	TRD vs response (improvement)	Meta-analysis of GWAS	GSRD, STAR*D, GENDEP	2214	rs6569421	RP11-735G4.1
Fabbri et al., 2019	30468137	TRD vs response (improvement)	Meta-analysis of GWAS	GSRD, STAR*D, GENDEP	2214	rs6569422	RP11-735G4.1
Fabbri et al., 2019	30468137	TRD vs response (improvement)	Meta-analysis of GWAS	GSRD, STAR*D, GENDEP	2214	rs6569423	RP11-735G4.1
Fabbri et al., 2019	30468137	TRD vs response (improvement)	Meta-analysis of GWAS	GSRD, STAR*D, GENDEP	2214	rs6902753	RP11-735G4.1
Fabbri et al., 2019	30468137	TRD vs response (improvement)	Meta-analysis of GWAS	GSRD, STAR*D, GENDEP	2214	rs6902926	RP11-735G4.1
Fabbri et al., 2019	30468137	TRD vs response (improvement)	Meta-analysis of GWAS	GSRD, STAR*D, GENDEP	2214	rs6910343	RP11-735G4.1
Fabbri et al., 2019	30468137	TRD vs response (improvement)	Meta-analysis of GWAS	GSRD, STAR*D, GENDEP	2214	rs6928592	RP11-735G4.1
Fabbri et al., 2019	30468137	TRD vs response (improvement)	Meta-analysis of GWAS	GSRD, STAR*D, GENDEP	2214	rs6933853	RP11-735G4.1
Fabbri et al., 2019	30468137	TRD vs response (improvement)	Meta-analysis of GWAS	GSRD, STAR*D, GENDEP	2214	rs73585946	RP11-735G4.1
Fabbri et al., 2019	30468137	TRD vs response (improvement)	Meta-analysis of GWAS	GSRD, STAR*D, GENDEP	2214	rs73585947	RP11-735G4.1
Fabbri et al., 2019	30468137	TRD vs response (improvement)	Meta-analysis of GWAS	GSRD, STAR*D, GENDEP	2214	rs73585949	RP11-735G4.1
Fabbri et al., 2019	30468137	TRD vs response (improvement)	Meta-analysis of GWAS	GSRD, STAR*D, GENDEP	2214	rs73585950	RP11-735G4.1
Fabbri et al., 2019	30468137	TRD vs response (improvement)	Meta-analysis of GWAS	GSRD, STAR*D, GENDEP	2214	rs76135203	RP11-735G4.1
Fabbri et al., 2019	30468137	TRD vs response (improvement)	Meta-analysis of GWAS	GSRD, STAR*D, GENDEP	2214	rs7775321	RP11-735G4.1
Fabbri et al., 2019	30468137	TRD vs response (improvement)	Meta-analysis of GWAS	GSRD, STAR*D, GENDEP	2214	rs77808977	RP11-735G4.1
Fabbri et al., 2019	30468137	TRD vs response (improvement)	Meta-analysis of GWAS	GSRD, STAR*D, GENDEP	2214	rs79043534	RP11-735G4.1
Fabbri et al., 2019	30468137	TRD vs response (improvement)	Meta-analysis of GWAS	GSRD, STAR*D, GENDEP	2214	rs6036731	RP4-564O4.1
Fabbri et al., 2019	30468137	TRD vs response (improvement)	GWAS	GSRD	759	rs10109318	SGCZ
Fabbri et al., 2019	30468137	TRD vs response (improvement)	GWAS	GSRD	759	rs1991346	SGCZ
Fabbri et al., 2019	30468137	TRD vs response (improvement)	GWAS	GSRD	759	rs151126591	STK3
Fabbri et al., 2019	30468137	TRD vs response (improvement)	GWAS	GSRD	759	rs138362018	TGM4
Fabbri et al., 2019	30468137	TRD vs response (improvement)	GWAS	GSRD	759	rs139388513	TGM4
Fabbri et al., 2019	30468137	TRD vs response (improvement)	GWAS	GSRD	759	rs17077022	TGM4
Fabbri et al., 2019	30468137	TRD vs response (improvement)	GWAS	GSRD	759	rs2036618	TGM4
Fabbri et al., 2019	30468137	TRD vs response (improvement)	GWAS	GSRD	759	rs11021818	TOLLIP-AS1
Fabbri et al., 2019	30468137	TRD vs response (improvement)	GWAS	GSRD	759	rs11022147	TOLLIP-AS1
Fabbri et al., 2019	30468137	TRD vs response (improvement)	GWAS	GSRD	759	rs2090193	TOLLIP-AS1
Fabbri et al., 2019	30468137	TRD vs response (improvement)	GWAS	GSRD	759	rs56118874	TOLLIP-AS1
Fabbri et al., 2019	30468137	TRD vs response (improvement)	GWAS	GSRD	759	rs56146392	TOLLIP-AS1
Fabbri et al., 2019	30468137	TRD vs response (improvement)	GWAS	GSRD	759	rs56249299	TOLLIP-AS1
Fabbri et al., 2019	30468137	TRD vs response (improvement)	GWAS	GSRD	759	rs12564480	WDR64
Fabbri et al., 2019	30468137	TRD vs response (improvement)	GWAS	GSRD	759	rs112928874	ZDHHC3
Fabbri et al., 2019	30468137	TRD vs response (improvement)	GWAS	GSRD	759	rs114031764	ZDHHC3
Fabbri et al., 2019	30468137	TRD vs response (improvement)	GWAS	GSRD	759	rs115094000	ZDHHC3
Fabbri et al., 2019	30468137	TRD vs response (improvement)	GWAS	GSRD	759	rs115151310	ZDHHC3
Fabbri et al., 2019	30468137	TRD vs response (improvement)	GWAS	GSRD	759	rs115379228	ZDHHC3
Fabbri et al., 2019	30468137	TRD vs response (improvement)	GWAS	GSRD	759	rs117678886	ZDHHC3
Fabbri et al., 2019	30468137	TRD vs response (improvement)	GWAS	GSRD	759	rs142626062	ZDHHC3
Fabbri et al., 2019	30468137	TRD vs response (improvement)	GWAS	GSRD	759	rs143146499	ZDHHC3
Fabbri et al., 2019	30468137	TRD vs response (improvement)	GWAS	GSRD	759	rs147477512	ZDHHC3
Fabbri et al., 2019	30468137	TRD vs response (improvement)	GWAS	GSRD	759	rs147965604	ZDHHC3
Fabbri et al., 2019	30468137	TRD vs response (improvement)	GWAS	GSRD	759	rs148279811	ZDHHC3
Fabbri et al., 2019	30468137	TRD vs response (improvement)	GWAS	GSRD	759	rs148559652	ZDHHC3
Fabbri et al., 2019	30468137	TRD vs response (improvement)	GWAS	GSRD	759	rs148939033	ZDHHC3
Fabbri et al., 2019	30468137	TRD vs response (improvement)	GWAS	GSRD	759	rs151145793	ZDHHC3
Fabbri et al., 2019	30468137	TRD vs response (improvement)	GWAS	GSRD	759	rs17077079	ZDHHC3
Fabbri et al., 2019	30468137	TRD vs response (improvement)	GWAS	GSRD	759	rs17077091	ZDHHC3
Fabbri et al., 2019	30468137	TRD vs response (improvement)	GWAS	GSRD	759	rs75154391	ZDHHC3
Fabbri et al., 2019	30468137	TRD vs response (improvement)	GWAS	GSRD	759	rs75637987	ZDHHC3
Fabbri et al., 2019	30468137	TRD vs response (improvement)	GWAS	GSRD	759	rs79025902	ZDHHC3
Fabbri et al., 2019	30468137	TRD vs response (improvement)	GWAS	GSRD	759	rs79035215	ZDHHC3
Fabbri et al., 2019	30468137	TRD vs response (improvement)	GWAS	GSRD	759	rs80343359	ZDHHC3
Fabbri et al., 2019	30468137	TRD vs response or non responsers to a first AD	Meta-analysis of GWAS	GSRD, STAR*D, GENDEP	3225	rs295690	CTC-419K13.1
Fabbri et al., 2019	30468137	TRD vs response or non responsers to a first AD	Meta-analysis of GWAS	GSRD, STAR*D, GENDEP	3225	rs295691	CTC-419K13.1
Fabbri et al., 2019	30468137	TRD vs response or non responsers to a first AD	Meta-analysis of GWAS	GSRD, STAR*D, GENDEP	3225	rs464676	CTC-419K13.1
Fabbri et al., 2019	30468137	TRD vs response or non responsers to a first AD	Meta-analysis of GWAS	GSRD, STAR*D, GENDEP	3225	rs10918445	ENSG00000225325
Fabbri et al., 2019	30468137	TRD vs response or non responsers to a first AD	GWAS	GSRD	1148	rs11931985	ENSG00000251326
Fabbri et al., 2019	30468137	TRD vs response or non responsers to a first AD	GWAS	GSRD	1148	rs62309565	ENSG00000251326
Fabbri et al., 2019	30468137	TRD vs response or non responsers to a first AD	GWAS	GSRD	1148	rs6829967	ENSG00000251326
Fabbri et al., 2019	30468137	TRD vs response or non responsers to a first AD	GWAS	GSRD	1148	rs6850785	ENSG00000251326
Fabbri et al., 2019	30468137	TRD vs response or non responsers to a first AD	GWAS	GSRD	1148	rs75453127	ENSG00000251326
Fabbri et al., 2019	30468137	TRD vs response or non responsers to a first AD	Meta-analysis of GWAS	GSRD, STAR*D, GENDEP	3225	rs75453127	ENSG00000251326
Fabbri et al., 2019	30468137	TRD vs response or non responsers to a first AD	GWAS	GSRD	1148	rs77920885	ENSG00000251326
Fabbri et al., 2019	30468137	TRD vs response or non responsers to a first AD	Meta-analysis of GWAS	GSRD, STAR*D, GENDEP	3225	rs77920885	ENSG00000251326
Fabbri et al., 2019	30468137	TRD vs response or non responsers to a first AD	GWAS	GSRD	1148	rs78326053	ENSG00000251326
Fabbri et al., 2019	30468137	TRD vs response or non responsers to a first AD	Meta-analysis of GWAS	GSRD, STAR*D, GENDEP	3225	rs78326053	ENSG00000251326
Fabbri et al., 2019	30468137	TRD vs response or non responsers to a first AD	GWAS	GSRD	1148	rs78990592	ENSG00000251326
Fabbri et al., 2019	30468137	TRD vs response or non responsers to a first AD	Meta-analysis of GWAS	GSRD, STAR*D, GENDEP	3225	rs78990592	ENSG00000251326
Fabbri et al., 2019	30468137	TRD vs response or non responsers to a first AD	GWAS	GSRD	1148	rs11933237	GAPDHP56
Fabbri et al., 2019	30468137	TRD vs response or non responsers to a first AD	GWAS	GSRD	1148	rs13134354	GAPDHP56
Fabbri et al., 2019	30468137	TRD vs response or non responsers to a first AD	Meta-analysis of GWAS	GSRD, STAR*D, GENDEP	3225	rs13134354	GAPDHP56
Fabbri et al., 2019	30468137	TRD vs response or non responsers to a first AD	GWAS	GSRD	1148	rs13146727	GAPDHP56
Fabbri et al., 2019	30468137	TRD vs response or non responsers to a first AD	Meta-analysis of GWAS	GSRD, STAR*D, GENDEP	3225	rs13146727	GAPDHP56
Fabbri et al., 2019	30468137	TRD vs response or non responsers to a first AD	GWAS	GSRD	1148	rs2311861	GAPDHP56
Fabbri et al., 2019	30468137	TRD vs response or non responsers to a first AD	GWAS	GSRD	1148	rs34265768	GAPDHP56
Fabbri et al., 2019	30468137	TRD vs response or non responsers to a first AD	Meta-analysis of GWAS	GSRD, STAR*D, GENDEP	3225	rs34265768	GAPDHP56
Fabbri et al., 2019	30468137	TRD vs response or non responsers to a first AD	GWAS	GSRD	1148	rs6852702	GAPDHP56
Fabbri et al., 2019	30468137	TRD vs response or non responsers to a first AD	GWAS	GSRD	1148	rs7672101	GAPDHP56
Fabbri et al., 2019	30468137	TRD vs response or non responsers to a first AD	GWAS	GSRD	1148	rs13049764	KRTAP13-1
Fabbri et al., 2019	30468137	TRD vs response or non responsers to a first AD	GWAS	GSRD	1148	rs2832854	KRTAP13-1
Fabbri et al., 2019	30468137	TRD vs response or non responsers to a first AD	GWAS	GSRD	1148	rs2898168	KRTAP13-1
Fabbri et al., 2019	30468137	TRD vs response or non responsers to a first AD	GWAS	GSRD	1148	rs9978257	KRTAP13-3
Fabbri et al., 2019	30468137	TRD vs response or non responsers to a first AD	Meta-analysis of GWAS	GSRD, STAR*D, GENDEP	3225	rs7232709	LOXHD1
Fabbri et al., 2019	30468137	TRD vs response or non responsers to a first AD	Meta-analysis of GWAS	GSRD, STAR*D, GENDEP	3225	rs72803246	MCC
Fabbri et al., 2019	30468137	TRD vs response or non responsers to a first AD	GWAS	GSRD	1148	nsv831124	METTL2B
Fabbri et al., 2019	30468137	TRD vs response or non responsers to a first AD	Meta-analysis of GWAS	GSRD, STAR*D, GENDEP	3225	rs11071225	NEDD4
Fabbri et al., 2019	30468137	TRD vs response or non responsers to a first AD	GWAS	GSRD	1148	nsv527355	PCNT
Fabbri et al., 2019	30468137	TRD vs response or non responsers to a first AD	GWAS	GSRD	1148	rs4863995	PGBD4P4
Fabbri et al., 2019	30468137	TRD vs response or non responsers to a first AD	GWAS	GSRD	1148	rs72926967	PGBD4P4
Fabbri et al., 2019	30468137	TRD vs response or non responsers to a first AD	Meta-analysis of GWAS	GSRD, STAR*D, GENDEP	3225	rs72926967	PGBD4P4
Fabbri et al., 2019	30468137	TRD vs response or non responsers to a first AD	GWAS	GSRD	1148	rs7665833	PGBD4P4
Fabbri et al., 2019	30468137	TRD vs response or non responsers to a first AD	Meta-analysis of GWAS	GSRD, STAR*D, GENDEP	3225	rs7665833	PGBD4P4
Fabbri et al., 2019	30468137	TRD vs response or non responsers to a first AD	GWAS	GSRD	1148	rs77478074	PGBD4P4
Fabbri et al., 2019	30468137	TRD vs response or non responsers to a first AD	Meta-analysis of GWAS	GSRD, STAR*D, GENDEP	3225	rs77478074	PGBD4P4
Fabbri et al., 2019	30468137	TRD vs response or non responsers to a first AD	Meta-analysis of GWAS	GSRD, STAR*D, GENDEP	3225	rs4715277	PKHD1
Fabbri et al., 2019	30468137	TRD vs response or non responsers to a first AD	GWAS	GSRD	1148	rs12006913	PTCHD1
Fabbri et al., 2019	30468137	TRD vs response or non responsers to a first AD	Meta-analysis of GWAS	GSRD, STAR*D, GENDEP	3225	rs3875145	RAB4B: MIA-RAB4B:RAB4B-EGLN2
Fabbri et al., 2019	30468137	TRD vs response or non responsers to a first AD	Meta-analysis of GWAS	GSRD, STAR*D, GENDEP	3225	rs11128273	RYBP
Fabbri et al., 2019	30468137	TRD vs response or non responsers to a first AD	Meta-analysis of GWAS	GSRD, STAR*D, GENDEP	3225	rs11128274	RYBP
Fabbri et al., 2019	30468137	TRD vs response or non responsers to a first AD	Meta-analysis of GWAS	GSRD, STAR*D, GENDEP	3225	rs11128275	RYBP
Fabbri et al., 2019	30468137	TRD vs response or non responsers to a first AD	GWAS	GSRD	1148	rs7735612	SLIT3
Fabbri et al., 2019	30468137	TRD vs response or non responsers to a first AD	Meta-analysis of GWAS	GSRD, STAR*D, GENDEP	3225	rs736625	SNRPA
Fabbri et al., 2018	29160301	AD remission	Meta-analysis of GWAS	escGENDEP, STAR*D	1828	rs79645820	ARHGAP15(-42.39kb)|KYNU(+44.62kb)
Fabbri et al., 2018	29160301	AD remission	Meta-analysis of GWAS	escGENDEP, STAR*D	1828	rs3935545	DDX51(+37.24kb)|GALNT9(-14.79kb)|NOC4L(+29.14kb)
Fabbri et al., 2018	29160301	AD remission	Meta-analysis of GWAS	GENDEP, STAR*D	2145	rs10784781	FRS2(-36.09kb)|YEATS4(+43.46kb)
Fabbri et al., 2018	29160301	AD remission	Meta-analysis of GWAS	GENDEP, STAR*D	2145	rs11036744	HBE1(+40.27kb)|OR51B2(-12.88kb)|OR51B4(+8.468kb)|OR51B5(-30.47kb)|OR51B6(-41.09kb)
Fabbri et al., 2018	29160301	AD remission	Meta-analysis of GWAS	escGENDEP, STAR*D	1828	rs11036744	HBE1(+40.27kb)|OR51B2(-12.88kb)|OR51B4(+8.468kb)|OR51B5(-30.47kb)|OR51B6(-41.09kb)
Fabbri et al., 2018	29160301	AD remission	Meta-analysis of GWAS	GENDEP, STAR*D	2145	rs4910744	HBE1(+42.58kb)|OR51B2(-10.57kb)|OR51B4(+10.78kb)|OR51B5(-28.16kb)|OR51B6(-38.78kb)
Fabbri et al., 2018	29160301	AD remission	Meta-analysis of GWAS	escGENDEP, STAR*D	1828	rs4910744	HBE1(+42.58kb)|OR51B2(-10.57kb)|OR51B4(+10.78kb)|OR51B5(-28.16kb)|OR51B6(-38.78kb)
Fabbri et al., 2018	29160301	AD remission	Meta-analysis of GWAS	escGENDEP, STAR*D	1828	rs453954	KCTD15(+30.58kb)
Fabbri et al., 2018	29160301	AD remission	Meta-analysis of GWAS	escGENDEP, STAR*D	1828	rs1102158	KCTD15(+30.69kb)
Fabbri et al., 2018	29160301	AD remission	Meta-analysis of GWAS	GENDEP, STAR*D	2145	rs1102156	KCTD15(+32.12kb)
Fabbri et al., 2018	29160301	AD remission	Meta-analysis of GWAS	escGENDEP, STAR*D	1828	rs1102156	KCTD15(+32.12kb)
Fabbri et al., 2018	29160301	AD remission	Meta-analysis of GWAS	GENDEP, STAR*D	2145	rs3849106	MYO10(0)
Fabbri et al., 2018	29160301	AD remission	Meta-analysis of GWAS	GENDEP, STAR*D	2145	rs4910749	OR51B2(-0.994kb)|OR51B4(+20.36kb)|OR51B5(-18.58kb)|OR51B6(-29.2kb)
Fabbri et al., 2018	29160301	AD remission	Meta-analysis of GWAS	escGENDEP, STAR*D	1828	rs4910749	OR51B2(-0.994kb)|OR51B4(+20.36kb)|OR51B5(-18.58kb)|OR51B6(-29.2kb)
Fabbri et al., 2018	29160301	AD remission	Meta-analysis of GWAS	GENDEP, STAR*D	2145	rs7482428	OR51B2(-2.101kb)|OR51B4(+19.25kb)|OR51B5(-19.69kb)|OR51B6(-30.31kb)
Fabbri et al., 2018	29160301	AD remission	Meta-analysis of GWAS	escGENDEP, STAR*D	1828	rs7482428	OR51B2(-2.101kb)|OR51B4(+19.25kb)|OR51B5(-19.69kb)|OR51B6(-30.31kb)
Fabbri et al., 2018	29160301	AD remission	Meta-analysis of GWAS	GENDEP, STAR*D	2145	rs2723382	OR51B2(+1.868kb)|OR51B4(+24.27kb)|OR51B5(-14.66kb)|OR51B6(-25.29kb)
Fabbri et al., 2018	29160301	AD remission	Meta-analysis of GWAS	escGENDEP, STAR*D	1828	rs2723382	OR51B2(+1.868kb)|OR51B4(+24.27kb)|OR51B5(-14.66kb)|OR51B6(-25.29kb)
Fabbri et al., 2018	29160301	AD remission	Meta-analysis of GWAS	GENDEP, STAR*D	2145	rs2723381	OR51B2(+2.293kb)|OR51B4(+24.7kb)|OR51B5(-14.24kb)|OR51B6(-24.86kb)
Fabbri et al., 2018	29160301	AD remission	Meta-analysis of GWAS	escGENDEP, STAR*D	1828	rs2723381	OR51B2(+2.293kb)|OR51B4(+24.7kb)|OR51B5(-14.24kb)|OR51B6(-24.86kb)
Fabbri et al., 2018	29160301	AD remission	Meta-analysis of GWAS	GENDEP, STAR*D	2145	rs10160507	OR51B2(+3.55kb)|OR51B4(+25.96kb)|OR51B5(-12.98kb)|OR51B6(-23.6kb)
Fabbri et al., 2018	29160301	AD remission	Meta-analysis of GWAS	escGENDEP, STAR*D	1828	rs10160507	OR51B2(+3.55kb)|OR51B4(+25.96kb)|OR51B5(-12.98kb)|OR51B6(-23.6kb)
Fabbri et al., 2018	29160301	AD remission	Meta-analysis of GWAS	GENDEP, STAR*D	2145	rs4134043	OR51B2(+4.622kb)|OR51B4(+27.03kb)|OR51B5(-11.91kb)|OR51B6(-22.53kb)
Fabbri et al., 2018	29160301	AD remission	Meta-analysis of GWAS	escGENDEP, STAR*D	1828	rs4134043	OR51B2(+4.622kb)|OR51B4(+27.03kb)|OR51B5(-11.91kb)|OR51B6(-22.53kb)
Fabbri et al., 2018	29160301	AD remission	Meta-analysis of GWAS	GENDEP, STAR*D	2145	rs2723386	OR51B2(+5.167kb)|OR51B4(+27.57kb)|OR51B5(-11.36kb)|OR51B6(-21.99kb)
Fabbri et al., 2018	29160301	AD remission	Meta-analysis of GWAS	escGENDEP, STAR*D	1828	rs2723386	OR51B2(+5.167kb)|OR51B4(+27.57kb)|OR51B5(-11.36kb)|OR51B6(-21.99kb)
Fabbri et al., 2018	29160301	AD remission	Meta-analysis of GWAS	GENDEP, STAR*D	2145	rs10837814	OR51B2(0)|OR51B4(+21.95kb)|OR51B5(-16.98kb)|OR51B6(-27.61kb)
Fabbri et al., 2018	29160301	AD remission	Meta-analysis of GWAS	escGENDEP, STAR*D	1828	rs10837814	OR51B2(0)|OR51B4(+21.95kb)|OR51B5(-16.98kb)|OR51B6(-27.61kb)
Fabbri et al., 2018	29160301	AD remission	Meta-analysis of GWAS	GENDEP, STAR*D	2145	rs4352485	PTTG2(+14.56kb)|TBC1D1(0)
Fabbri et al., 2018	29160301	AD remission	Meta-analysis of GWAS	escGENDEP, STAR*D	1828	rs4352485	PTTG2(+14.56kb)|TBC1D1(0)
Fabbri et al., 2018	29160301	AD remission	Meta-analysis of GWAS	GENDEP, STAR*D	2145	rs17768250	ZFAT(0)|ZFAT-AS1(-39.64kb)
Fabbri et al., 2018	29160301	AD remission	Meta-analysis of GWAS	escGENDEP, STAR*D	1828	rs17768250	ZFAT(0)|ZFAT-AS1(-39.64kb)
Fabbri et al., 2018	29160301	AD remission	Meta-analysis of GWAS	GENDEP, STAR*D	2145	rs76510996	ZFAT(0)|ZFAT-AS1(+24.18kb)
Fabbri et al., 2018	29160301	AD remission	Meta-analysis of GWAS	GENDEP, STAR*D	2145	rs10857054	/
Fabbri et al., 2018	29160301	AD remission	Meta-analysis of GWAS	GENDEP, STAR*D	2145	rs1113660	/
Fabbri et al., 2018	29160301	AD remission	Meta-analysis of GWAS	GENDEP, STAR*D	2145	rs11562892	/
Fabbri et al., 2018	29160301	AD remission	Meta-analysis of GWAS	escGENDEP, STAR*D	1828	rs11562892	/
Fabbri et al., 2018	29160301	AD remission	Meta-analysis of GWAS	GENDEP, STAR*D	2145	rs11562909	/
Fabbri et al., 2018	29160301	AD remission	Meta-analysis of GWAS	GENDEP, STAR*D	2145	rs11562910	/
Fabbri et al., 2018	29160301	AD remission	Meta-analysis of GWAS	GENDEP, STAR*D	2145	rs11725189	/
Fabbri et al., 2018	29160301	AD remission	Meta-analysis of GWAS	GENDEP, STAR*D	2145	rs11729090	/
Fabbri et al., 2018	29160301	AD remission	Meta-analysis of GWAS	GENDEP, STAR*D	2145	rs11733276	/
Fabbri et al., 2018	29160301	AD remission	Meta-analysis of GWAS	escGENDEP, STAR*D	1828	rs12044299	/
Fabbri et al., 2018	29160301	AD remission	Meta-analysis of GWAS	GENDEP, STAR*D	2145	rs12644500	/
Fabbri et al., 2018	29160301	AD remission	Meta-analysis of GWAS	escGENDEP, STAR*D	1828	rs12644500	/
Fabbri et al., 2018	29160301	AD remission	Meta-analysis of GWAS	GENDEP, STAR*D	2145	rs13125431	/
Fabbri et al., 2018	29160301	AD remission	Meta-analysis of GWAS	GENDEP, STAR*D	2145	rs13135373	/
Fabbri et al., 2018	29160301	AD remission	Meta-analysis of GWAS	GENDEP, STAR*D	2145	rs13146885	/
Fabbri et al., 2018	29160301	AD remission	Meta-analysis of GWAS	GENDEP, STAR*D	2145	rs17862040	/
Fabbri et al., 2018	29160301	AD remission	Meta-analysis of GWAS	escGENDEP, STAR*D	1828	rs17862040	/
Fabbri et al., 2018	29160301	AD remission	Meta-analysis of GWAS	GENDEP, STAR*D	2145	rs17863861	/
Fabbri et al., 2018	29160301	AD remission	Meta-analysis of GWAS	GENDEP, STAR*D	2145	rs17863866	/
Fabbri et al., 2018	29160301	AD remission	Meta-analysis of GWAS	GENDEP, STAR*D	2145	rs17865843	/
Fabbri et al., 2018	29160301	AD remission	Meta-analysis of GWAS	GENDEP, STAR*D	2145	rs17866159	/
Fabbri et al., 2018	29160301	AD remission	Meta-analysis of GWAS	GENDEP, STAR*D	2145	rs17867500	/
Fabbri et al., 2018	29160301	AD remission	Meta-analysis of GWAS	escGENDEP, STAR*D	1828	rs17867500	/
Fabbri et al., 2018	29160301	AD remission	Meta-analysis of GWAS	GENDEP, STAR*D	2145	rs17867501	/
Fabbri et al., 2018	29160301	AD remission	Meta-analysis of GWAS	escGENDEP, STAR*D	1828	rs17867501	/
Fabbri et al., 2018	29160301	AD remission	Meta-analysis of GWAS	GENDEP, STAR*D	2145	rs1948232	/
Fabbri et al., 2018	29160301	AD remission	Meta-analysis of GWAS	GENDEP, STAR*D	2145	rs1948233	/
Fabbri et al., 2018	29160301	AD remission	Meta-analysis of GWAS	GENDEP, STAR*D	2145	rs1961053	/
Fabbri et al., 2018	29160301	AD remission	Meta-analysis of GWAS	GENDEP, STAR*D	2145	rs2245104	/
Fabbri et al., 2018	29160301	AD remission	Meta-analysis of GWAS	GENDEP, STAR*D	2145	rs2245110	/
Fabbri et al., 2018	29160301	AD remission	Meta-analysis of GWAS	GENDEP, STAR*D	2145	rs2245112	/
Fabbri et al., 2018	29160301	AD remission	Meta-analysis of GWAS	GENDEP, STAR*D	2145	rs2245138	/
Fabbri et al., 2018	29160301	AD remission	Meta-analysis of GWAS	GENDEP, STAR*D	2145	rs2245142	/
Fabbri et al., 2018	29160301	AD remission	Meta-analysis of GWAS	GENDEP, STAR*D	2145	rs2245255	/
Fabbri et al., 2018	29160301	AD remission	Meta-analysis of GWAS	GENDEP, STAR*D	2145	rs2245313	/
Fabbri et al., 2018	29160301	AD remission	Meta-analysis of GWAS	GENDEP, STAR*D	2145	rs2245321	/
Fabbri et al., 2018	29160301	AD remission	Meta-analysis of GWAS	GENDEP, STAR*D	2145	rs2245354	/
Fabbri et al., 2018	29160301	AD remission	Meta-analysis of GWAS	GENDEP, STAR*D	2145	rs2389377	/
Fabbri et al., 2018	29160301	AD remission	Meta-analysis of GWAS	GENDEP, STAR*D	2145	rs2389378	/
Fabbri et al., 2018	29160301	AD remission	Meta-analysis of GWAS	GENDEP, STAR*D	2145	rs2389379	/
Fabbri et al., 2018	29160301	AD remission	Meta-analysis of GWAS	GENDEP, STAR*D	2145	rs2635249	/
Fabbri et al., 2018	29160301	AD remission	Meta-analysis of GWAS	GENDEP, STAR*D	2145	rs2635363	/
Fabbri et al., 2018	29160301	AD remission	Meta-analysis of GWAS	GENDEP, STAR*D	2145	rs2635364	/
Fabbri et al., 2018	29160301	AD remission	Meta-analysis of GWAS	GENDEP, STAR*D	2145	rs2635366	/
Fabbri et al., 2018	29160301	AD remission	Meta-analysis of GWAS	GENDEP, STAR*D	2145	rs34966936	/
Fabbri et al., 2018	29160301	AD remission	Meta-analysis of GWAS	GENDEP, STAR*D	2145	rs35551581	/
Fabbri et al., 2018	29160301	AD remission	Meta-analysis of GWAS	GENDEP, STAR*D	2145	rs3811752	/
Fabbri et al., 2018	29160301	AD remission	Meta-analysis of GWAS	escGENDEP, STAR*D	1828	rs3811752	/
Fabbri et al., 2018	29160301	AD remission	Meta-analysis of GWAS	GENDEP, STAR*D	2145	rs3811753	/
Fabbri et al., 2018	29160301	AD remission	Meta-analysis of GWAS	escGENDEP, STAR*D	1828	rs3811753	/
Fabbri et al., 2018	29160301	AD remission	Meta-analysis of GWAS	GENDEP, STAR*D	2145	rs3811754	/
Fabbri et al., 2018	29160301	AD remission	Meta-analysis of GWAS	GENDEP, STAR*D	2145	rs3811756	/
Fabbri et al., 2018	29160301	AD remission	Meta-analysis of GWAS	GENDEP, STAR*D	2145	rs3811757	/
Fabbri et al., 2018	29160301	AD remission	Meta-analysis of GWAS	GENDEP, STAR*D	2145	rs7420310	/
Fabbri et al., 2018	29160301	AD remission	Meta-analysis of GWAS	GENDEP, STAR*D	2145	rs74442120	/
Fabbri et al., 2018	29160301	AD remission	Meta-analysis of GWAS	GENDEP, STAR*D	2145	rs76756809	/
Fabbri et al., 2018	29160301	AD remission	Meta-analysis of GWAS	GENDEP, STAR*D	2145	rs923442	/
Fabbri et al., 2018	29160301	AD remission	Meta-analysis of GWAS	GENDEP, STAR*D	2145	rs923443	/
Fabbri et al., 2018	29160301	% symptom change	Meta-analysis of GWAS	escGENDEP, STAR*D	1828	rs78698580	ADPGK(+35.39kb)|ADPGK-AS1(+20.97kb)
Fabbri et al., 2018	29160301	% symptom change	Meta-analysis of GWAS	GENDEP, STAR*D	2145	rs17382228	AFAP1(-17.3kb)|AFAP1-AS1(-12.68kb)|SORCS2(0)
Fabbri et al., 2018	29160301	% symptom change	Meta-analysis of GWAS	GENDEP, STAR*D	2145	rs58843488	CALHM3(+34.16kb)|NEURL1(0)
Fabbri et al., 2018	29160301	% symptom change	Meta-analysis of GWAS	GENDEP, STAR*D	2145	rs11813481	CALHM3(+36.75kb)|NEURL1(0)
Fabbri et al., 2018	29160301	% symptom change	Meta-analysis of GWAS	GENDEP, STAR*D	2145	rs60012792	CALHM3(+36.92kb)|NEURL1(0)
Fabbri et al., 2018	29160301	% symptom change	Meta-analysis of GWAS	GENDEP, STAR*D	2145	rs72848950	CALHM3(+37.55kb)|NEURL1(0)
Fabbri et al., 2018	29160301	% symptom change	Meta-analysis of GWAS	escGENDEP, STAR*D	1828	rs9910424	CCDC182(-21.85kb)|MSI2(+42.69kb)
Fabbri et al., 2018	29160301	% symptom change	Meta-analysis of GWAS	escGENDEP, STAR*D	1828	rs10775394	CCDC182(-26.38kb)|MSI2(+38.16kb)
Fabbri et al., 2018	29160301	% symptom change	Meta-analysis of GWAS	GENDEP, STAR*D	2145	rs112687359	CLEC17A(+36.66kb)|EMR3(0)|ZNF333(-42.26kb)
Fabbri et al., 2018	29160301	% symptom change	Meta-analysis of GWAS	GENDEP, STAR*D	2145	rs59689479	CSGALNACT1(0)
Fabbri et al., 2018	29160301	% symptom change	Meta-analysis of GWAS	GENDEP, STAR*D	2145	rs61751813	CTNND2(0)
Fabbri et al., 2018	29160301	% symptom change	Meta-analysis of GWAS	GENDEP, STAR*D	2145	rs6878462	CTNND2(0)
Fabbri et al., 2018	29160301	% symptom change	Meta-analysis of GWAS	escGENDEP, STAR*D	1828	rs11246968	DDX51(+34.5kb)|GALNT9(-17.54kb)|NOC4L(+26.39kb)
Fabbri et al., 2018	29160301	% symptom change	Meta-analysis of GWAS	escGENDEP, STAR*D	1828	rs66712530	DDX51(+35.4kb)|GALNT9(-16.63kb)|NOC4L(+27.3kb)
Fabbri et al., 2018	29160301	% symptom change	Meta-analysis of GWAS	escGENDEP, STAR*D	1828	rs11246969	DDX51(+35.79kb)|GALNT9(-16.24kb)|NOC4L(+27.68kb)
Fabbri et al., 2018	29160301	% symptom change	Meta-analysis of GWAS	escGENDEP, STAR*D	1828	rs11246970	DDX51(+36.36kb)|GALNT9(-15.68kb)|NOC4L(+28.25kb)
Fabbri et al., 2018	29160301	% symptom change	Meta-analysis of GWAS	escGENDEP, STAR*D	1828	rs4072338	DDX51(+36.81kb)|GALNT9(-15.22kb)|NOC4L(+28.71kb)
Fabbri et al., 2018	29160301	% symptom change	Meta-analysis of GWAS	escGENDEP, STAR*D	1828	rs73164990	DDX51(+37.01kb)|GALNT9(-15.03kb)|NOC4L(+28.9kb)
Fabbri et al., 2018	29160301	% symptom change	Meta-analysis of GWAS	GENDEP, STAR*D	2145	rs3935545	DDX51(+37.24kb)|GALNT9(-14.79kb)|NOC4L(+29.14kb)
Fabbri et al., 2018	29160301	% symptom change	Meta-analysis of GWAS	escGENDEP, STAR*D	1828	rs3935545	DDX51(+37.24kb)|GALNT9(-14.79kb)|NOC4L(+29.14kb)
Fabbri et al., 2018	29160301	% symptom change	Meta-analysis of GWAS	GENDEP, STAR*D	2145	rs4658888	DISC1(0)|TSNAX-DISC1(0)
Fabbri et al., 2018	29160301	% symptom change	Meta-analysis of GWAS	GENDEP, STAR*D	2145	rs116503642	FEM1C(+31.07kb)|LOC101927100(-26.19kb)|TICAM2(-2.532kb)|TMED7(-37.24kb)|TMED7-TICAM2(-2.532kb)
Fabbri et al., 2018	29160301	% symptom change	Meta-analysis of GWAS	escGENDEP, STAR*D	1828	rs1654670	GRIN2D(0)|GRWD1(-34.85kb)|KCNJ14(-44.78kb)|KDELR1(+19.37kb)|SYNGR4(+34.54kb)|TMEM143(+46.99kb)
Fabbri et al., 2018	29160301	% symptom change	Meta-analysis of GWAS	GENDEP, STAR*D	2145	rs116692768	ITGA9(0)
Fabbri et al., 2018	29160301	% symptom change	Meta-analysis of GWAS	escGENDEP, STAR*D	1828	rs74678274	ITGA9(0)
Fabbri et al., 2018	29160301	% symptom change	Meta-analysis of GWAS	escGENDEP, STAR*D	1828	rs116749904	LOC101927100(-2.486kb)|LOC102467217(-42.46kb)|TICAM2(0)|TMED7(-13.54kb)|TMED7-TICAM2(0)
Fabbri et al., 2018	29160301	% symptom change	Meta-analysis of GWAS	escGENDEP, STAR*D	1828	rs1923240	LOC101927295(-0.507kb)
Fabbri et al., 2018	29160301	% symptom change	Meta-analysis of GWAS	escGENDEP, STAR*D	1828	rs35641559	LOC101927295(-11.75kb)
Fabbri et al., 2018	29160301	% symptom change	Meta-analysis of GWAS	escGENDEP, STAR*D	1828	rs10890030	LOC101927295(-16.07kb)
Fabbri et al., 2018	29160301	% symptom change	Meta-analysis of GWAS	escGENDEP, STAR*D	1828	rs7549372	LOC101927295(-16.32kb)
Fabbri et al., 2018	29160301	% symptom change	Meta-analysis of GWAS	escGENDEP, STAR*D	1828	rs12142515	LOC101927295(-19.84kb)
Fabbri et al., 2018	29160301	% symptom change	Meta-analysis of GWAS	escGENDEP, STAR*D	1828	rs10890029	LOC101927295(-20.15kb)
Fabbri et al., 2018	29160301	% symptom change	Meta-analysis of GWAS	escGENDEP, STAR*D	1828	rs11210196	LOC101927295(-21.28kb)
Fabbri et al., 2018	29160301	% symptom change	Meta-analysis of GWAS	escGENDEP, STAR*D	1828	rs12044218	LOC101927295(-21.43kb)
Fabbri et al., 2018	29160301	% symptom change	Meta-analysis of GWAS	escGENDEP, STAR*D	1828	rs11210195	LOC101927295(-22.57kb)
Fabbri et al., 2018	29160301	% symptom change	Meta-analysis of GWAS	escGENDEP, STAR*D	1828	rs7513593	LOC101927295(-24.62kb)
Fabbri et al., 2018	29160301	% symptom change	Meta-analysis of GWAS	escGENDEP, STAR*D	1828	rs6684341	LOC101927295(-27.01kb)
Fabbri et al., 2018	29160301	% symptom change	Meta-analysis of GWAS	escGENDEP, STAR*D	1828	rs11210193	LOC101927295(-27.98kb)
Fabbri et al., 2018	29160301	% symptom change	Meta-analysis of GWAS	escGENDEP, STAR*D	1828	rs11210191	LOC101927295(-29.23kb)
Fabbri et al., 2018	29160301	% symptom change	Meta-analysis of GWAS	escGENDEP, STAR*D	1828	rs12077046	LOC101927295(-32.21kb)
Fabbri et al., 2018	29160301	% symptom change	Meta-analysis of GWAS	escGENDEP, STAR*D	1828	rs10890025	LOC101927295(-33.69kb)
Fabbri et al., 2018	29160301	% symptom change	Meta-analysis of GWAS	escGENDEP, STAR*D	1828	rs12759031	LOC101927295(-34.96kb)
Fabbri et al., 2018	29160301	% symptom change	Meta-analysis of GWAS	escGENDEP, STAR*D	1828	rs61765637	LOC101927295(-36.45kb)
Fabbri et al., 2018	29160301	% symptom change	Meta-analysis of GWAS	escGENDEP, STAR*D	1828	rs7532462	LOC101927295(-5.69kb)
Fabbri et al., 2018	29160301	% symptom change	Meta-analysis of GWAS	escGENDEP, STAR*D	1828	rs7522217	LOC101927295(-5.732kb)
Fabbri et al., 2018	29160301	% symptom change	Meta-analysis of GWAS	escGENDEP, STAR*D	1828	rs7555507	LOC101927295(-5.815kb)
Fabbri et al., 2018	29160301	% symptom change	Meta-analysis of GWAS	escGENDEP, STAR*D	1828	rs12049376	LOC101927295(-7.14kb)
Fabbri et al., 2018	29160301	% symptom change	Meta-analysis of GWAS	escGENDEP, STAR*D	1828	rs1120980	LOC101927295(+0.544kb)
Fabbri et al., 2018	29160301	% symptom change	Meta-analysis of GWAS	escGENDEP, STAR*D	1828	rs10493515	LOC101927295(+11.07kb)
Fabbri et al., 2018	29160301	% symptom change	Meta-analysis of GWAS	escGENDEP, STAR*D	1828	rs1923217	LOC101927295(+24.66kb)
Fabbri et al., 2018	29160301	% symptom change	Meta-analysis of GWAS	escGENDEP, STAR*D	1828	rs1923225	LOC101927295(+38.91kb)
Fabbri et al., 2018	29160301	% symptom change	Meta-analysis of GWAS	GENDEP, STAR*D	2145	rs12718437	LOC101927295(+46.65kb)
Fabbri et al., 2018	29160301	% symptom change	Meta-analysis of GWAS	escGENDEP, STAR*D	1828	rs12718437	LOC101927295(+46.65kb)
Fabbri et al., 2018	29160301	% symptom change	Meta-analysis of GWAS	escGENDEP, STAR*D	1828	rs10789368	LOC101927295(+9.599kb)
Fabbri et al., 2018	29160301	% symptom change	Meta-analysis of GWAS	escGENDEP, STAR*D	1828	rs10890031	LOC101927295(0)
Fabbri et al., 2018	29160301	% symptom change	Meta-analysis of GWAS	escGENDEP, STAR*D	1828	rs12036558	LOC101927295(0)
Fabbri et al., 2018	29160301	% symptom change	Meta-analysis of GWAS	escGENDEP, STAR*D	1828	rs12564425	LOC101927295(0)
Fabbri et al., 2018	29160301	% symptom change	Meta-analysis of GWAS	escGENDEP, STAR*D	1828	rs12737087	LOC101927295(0)
Fabbri et al., 2018	29160301	% symptom change	Meta-analysis of GWAS	escGENDEP, STAR*D	1828	rs1923204	LOC101927295(0)
Fabbri et al., 2018	29160301	% symptom change	Meta-analysis of GWAS	escGENDEP, STAR*D	1828	rs2180945	LOC101927295(0)
Fabbri et al., 2018	29160301	% symptom change	Meta-analysis of GWAS	escGENDEP, STAR*D	1828	rs2224494	LOC101927295(0)
Fabbri et al., 2018	29160301	% symptom change	Meta-analysis of GWAS	escGENDEP, STAR*D	1828	rs35851404	LOC101927295(0)
Fabbri et al., 2018	29160301	% symptom change	Meta-analysis of GWAS	escGENDEP, STAR*D	1828	rs3845343	LOC101927295(0)
Fabbri et al., 2018	29160301	% symptom change	Meta-analysis of GWAS	GENDEP, STAR*D	2145	rs78940746	MFN1(-25.75kb)|ZNF639(-1.819kb)
Fabbri et al., 2018	29160301	% symptom change	Meta-analysis of GWAS	GENDEP, STAR*D	2145	rs298207	MIR124-2(-9.108kb)|MIR124-2HG(-3.177kb)
Fabbri et al., 2018	29160301	% symptom change	Meta-analysis of GWAS	escGENDEP, STAR*D	1828	rs72616135	MIR4274(-45.77kb)|PSAPL1(-16.04kb)|SORCS2(0)
Fabbri et al., 2018	29160301	% symptom change	Meta-analysis of GWAS	GENDEP, STAR*D	2145	rs11167062	MROH5(0)|PTP4A3(+16.48kb)
Fabbri et al., 2018	29160301	% symptom change	Meta-analysis of GWAS	GENDEP, STAR*D	2145	rs11986561	MROH5(0)|PTP4A3(+16.5kb)
Fabbri et al., 2018	29160301	% symptom change	Meta-analysis of GWAS	GENDEP, STAR*D	2145	rs11781250	MROH5(0)|PTP4A3(+17.94kb)
Fabbri et al., 2018	29160301	% symptom change	Meta-analysis of GWAS	GENDEP, STAR*D	2145	rs76191705	NRXN3(0)
Fabbri et al., 2018	29160301	% symptom change	Meta-analysis of GWAS	escGENDEP, STAR*D	1828	rs76250440	NRXN3(0)
Fabbri et al., 2018	29160301	% symptom change	Meta-analysis of GWAS	escGENDEP, STAR*D	1828	rs77384930	NRXN3(0)
Fabbri et al., 2018	29160301	% symptom change	Meta-analysis of GWAS	GENDEP, STAR*D	2145	rs79302561	NRXN3(0)
Fabbri et al., 2018	29160301	% symptom change	Meta-analysis of GWAS	escGENDEP, STAR*D	1828	rs79302561	NRXN3(0)
Fabbri et al., 2018	29160301	% symptom change	Meta-analysis of GWAS	GENDEP, STAR*D	2145	rs117379618	OVGP1(-43.18kb)|PGCP1(-13.39kb)|PIFO(+18.12kb)
Fabbri et al., 2018	29160301	% symptom change	Meta-analysis of GWAS	GENDEP, STAR*D	2145	rs10465868	/
Fabbri et al., 2018	29160301	% symptom change	Meta-analysis of GWAS	escGENDEP, STAR*D	1828	rs10465868	/
Fabbri et al., 2018	29160301	% symptom change	Meta-analysis of GWAS	GENDEP, STAR*D	2145	rs10465869	/
Fabbri et al., 2018	29160301	% symptom change	Meta-analysis of GWAS	escGENDEP, STAR*D	1828	rs10465869	/
Fabbri et al., 2018	29160301	% symptom change	Meta-analysis of GWAS	GENDEP, STAR*D	2145	rs10493517	/
Fabbri et al., 2018	29160301	% symptom change	Meta-analysis of GWAS	escGENDEP, STAR*D	1828	rs10493517	/
Fabbri et al., 2018	29160301	% symptom change	Meta-analysis of GWAS	GENDEP, STAR*D	2145	rs10493518	/
Fabbri et al., 2018	29160301	% symptom change	Meta-analysis of GWAS	escGENDEP, STAR*D	1828	rs10493518	/
Fabbri et al., 2018	29160301	% symptom change	Meta-analysis of GWAS	escGENDEP, STAR*D	1828	rs11149178	/
Fabbri et al., 2018	29160301	% symptom change	Meta-analysis of GWAS	escGENDEP, STAR*D	1828	rs11210177	/
Fabbri et al., 2018	29160301	% symptom change	Meta-analysis of GWAS	GENDEP, STAR*D	2145	rs11210184	/
Fabbri et al., 2018	29160301	% symptom change	Meta-analysis of GWAS	escGENDEP, STAR*D	1828	rs11210184	/
Fabbri et al., 2018	29160301	% symptom change	Meta-analysis of GWAS	GENDEP, STAR*D	2145	rs11210232	/
Fabbri et al., 2018	29160301	% symptom change	Meta-analysis of GWAS	escGENDEP, STAR*D	1828	rs11210232	/
Fabbri et al., 2018	29160301	% symptom change	Meta-analysis of GWAS	GENDEP, STAR*D	2145	rs11210235	/
Fabbri et al., 2018	29160301	% symptom change	Meta-analysis of GWAS	escGENDEP, STAR*D	1828	rs11210235	/
Fabbri et al., 2018	29160301	% symptom change	Meta-analysis of GWAS	GENDEP, STAR*D	2145	rs11210236	/
Fabbri et al., 2018	29160301	% symptom change	Meta-analysis of GWAS	escGENDEP, STAR*D	1828	rs11210236	/
Fabbri et al., 2018	29160301	% symptom change	Meta-analysis of GWAS	GENDEP, STAR*D	2145	rs11210237	/
Fabbri et al., 2018	29160301	% symptom change	Meta-analysis of GWAS	escGENDEP, STAR*D	1828	rs11210237	/
Fabbri et al., 2018	29160301	% symptom change	Meta-analysis of GWAS	GENDEP, STAR*D	2145	rs11210242	/
Fabbri et al., 2018	29160301	% symptom change	Meta-analysis of GWAS	escGENDEP, STAR*D	1828	rs11210242	/
Fabbri et al., 2018	29160301	% symptom change	Meta-analysis of GWAS	GENDEP, STAR*D	2145	rs11210243	/
Fabbri et al., 2018	29160301	% symptom change	Meta-analysis of GWAS	escGENDEP, STAR*D	1828	rs11210243	/
Fabbri et al., 2018	29160301	% symptom change	Meta-analysis of GWAS	GENDEP, STAR*D	2145	rs11210244	/
Fabbri et al., 2018	29160301	% symptom change	Meta-analysis of GWAS	escGENDEP, STAR*D	1828	rs11210244	/
Fabbri et al., 2018	29160301	% symptom change	Meta-analysis of GWAS	escGENDEP, STAR*D	1828	rs11210247	/
Fabbri et al., 2018	29160301	% symptom change	Meta-analysis of GWAS	escGENDEP, STAR*D	1828	rs11210251	/
Fabbri et al., 2018	29160301	% symptom change	Meta-analysis of GWAS	escGENDEP, STAR*D	1828	rs11210257	/
Fabbri et al., 2018	29160301	% symptom change	Meta-analysis of GWAS	escGENDEP, STAR*D	1828	rs11210259	/
Fabbri et al., 2018	29160301	% symptom change	Meta-analysis of GWAS	escGENDEP, STAR*D	1828	rs115149158	/
Fabbri et al., 2018	29160301	% symptom change	Meta-analysis of GWAS	escGENDEP, STAR*D	1828	rs12033505	/
Fabbri et al., 2018	29160301	% symptom change	Meta-analysis of GWAS	GENDEP, STAR*D	2145	rs12034885	/
Fabbri et al., 2018	29160301	% symptom change	Meta-analysis of GWAS	escGENDEP, STAR*D	1828	rs12034885	/
Fabbri et al., 2018	29160301	% symptom change	Meta-analysis of GWAS	escGENDEP, STAR*D	1828	rs12037168	/
Fabbri et al., 2018	29160301	% symptom change	Meta-analysis of GWAS	GENDEP, STAR*D	2145	rs12044316	/
Fabbri et al., 2018	29160301	% symptom change	Meta-analysis of GWAS	escGENDEP, STAR*D	1828	rs12044316	/
Fabbri et al., 2018	29160301	% symptom change	Meta-analysis of GWAS	GENDEP, STAR*D	2145	rs12044445	/
Fabbri et al., 2018	29160301	% symptom change	Meta-analysis of GWAS	escGENDEP, STAR*D	1828	rs12044445	/
Fabbri et al., 2018	29160301	% symptom change	Meta-analysis of GWAS	GENDEP, STAR*D	2145	rs12404978	/
Fabbri et al., 2018	29160301	% symptom change	Meta-analysis of GWAS	escGENDEP, STAR*D	1828	rs12404978	/
Fabbri et al., 2018	29160301	% symptom change	Meta-analysis of GWAS	escGENDEP, STAR*D	1828	rs12562533	/
Fabbri et al., 2018	29160301	% symptom change	Meta-analysis of GWAS	GENDEP, STAR*D	2145	rs12565386	/
Fabbri et al., 2018	29160301	% symptom change	Meta-analysis of GWAS	escGENDEP, STAR*D	1828	rs12565386	/
Fabbri et al., 2018	29160301	% symptom change	Meta-analysis of GWAS	escGENDEP, STAR*D	1828	rs12569115	/
Fabbri et al., 2018	29160301	% symptom change	Meta-analysis of GWAS	escGENDEP, STAR*D	1828	rs12747728	/
Fabbri et al., 2018	29160301	% symptom change	Meta-analysis of GWAS	GENDEP, STAR*D	2145	rs1316718	/
Fabbri et al., 2018	29160301	% symptom change	Meta-analysis of GWAS	escGENDEP, STAR*D	1828	rs1316718	/
Fabbri et al., 2018	29160301	% symptom change	Meta-analysis of GWAS	GENDEP, STAR*D	2145	rs1338647	/
Fabbri et al., 2018	29160301	% symptom change	Meta-analysis of GWAS	escGENDEP, STAR*D	1828	rs1338647	/
Fabbri et al., 2018	29160301	% symptom change	Meta-analysis of GWAS	GENDEP, STAR*D	2145	rs1338648	/
Fabbri et al., 2018	29160301	% symptom change	Meta-analysis of GWAS	escGENDEP, STAR*D	1828	rs1338648	/
Fabbri et al., 2018	29160301	% symptom change	Meta-analysis of GWAS	GENDEP, STAR*D	2145	rs1338649	/
Fabbri et al., 2018	29160301	% symptom change	Meta-analysis of GWAS	escGENDEP, STAR*D	1828	rs1338649	/
Fabbri et al., 2018	29160301	% symptom change	Meta-analysis of GWAS	GENDEP, STAR*D	2145	rs1338650	/
Fabbri et al., 2018	29160301	% symptom change	Meta-analysis of GWAS	escGENDEP, STAR*D	1828	rs1338650	/
Fabbri et al., 2018	29160301	% symptom change	Meta-analysis of GWAS	GENDEP, STAR*D	2145	rs1338656	/
Fabbri et al., 2018	29160301	% symptom change	Meta-analysis of GWAS	escGENDEP, STAR*D	1828	rs1338656	/
Fabbri et al., 2018	29160301	% symptom change	Meta-analysis of GWAS	GENDEP, STAR*D	2145	rs1361244	/
Fabbri et al., 2018	29160301	% symptom change	Meta-analysis of GWAS	escGENDEP, STAR*D	1828	rs1361244	/
Fabbri et al., 2018	29160301	% symptom change	Meta-analysis of GWAS	escGENDEP, STAR*D	1828	rs1407546	/
Fabbri et al., 2018	29160301	% symptom change	Meta-analysis of GWAS	escGENDEP, STAR*D	1828	rs1407547	/
Fabbri et al., 2018	29160301	% symptom change	Meta-analysis of GWAS	escGENDEP, STAR*D	1828	rs1416266	/
Fabbri et al., 2018	29160301	% symptom change	Meta-analysis of GWAS	GENDEP, STAR*D	2145	rs1416274	/
Fabbri et al., 2018	29160301	% symptom change	Meta-analysis of GWAS	escGENDEP, STAR*D	1828	rs1416274	/
Fabbri et al., 2018	29160301	% symptom change	Meta-analysis of GWAS	escGENDEP, STAR*D	1828	rs141662690	/
Fabbri et al., 2018	29160301	% symptom change	Meta-analysis of GWAS	escGENDEP, STAR*D	1828	rs1538375	/
Fabbri et al., 2018	29160301	% symptom change	Meta-analysis of GWAS	escGENDEP, STAR*D	1828	rs1538376	/
Fabbri et al., 2018	29160301	% symptom change	Meta-analysis of GWAS	GENDEP, STAR*D	2145	rs1572668	/
Fabbri et al., 2018	29160301	% symptom change	Meta-analysis of GWAS	escGENDEP, STAR*D	1828	rs1572668	/
Fabbri et al., 2018	29160301	% symptom change	Meta-analysis of GWAS	GENDEP, STAR*D	2145	rs1885250	/
Fabbri et al., 2018	29160301	% symptom change	Meta-analysis of GWAS	escGENDEP, STAR*D	1828	rs1885250	/
Fabbri et al., 2018	29160301	% symptom change	Meta-analysis of GWAS	GENDEP, STAR*D	2145	rs1885251	/
Fabbri et al., 2018	29160301	% symptom change	Meta-analysis of GWAS	escGENDEP, STAR*D	1828	rs1885251	/
Fabbri et al., 2018	29160301	% symptom change	Meta-analysis of GWAS	GENDEP, STAR*D	2145	rs1923243	/
Fabbri et al., 2018	29160301	% symptom change	Meta-analysis of GWAS	escGENDEP, STAR*D	1828	rs1923243	/
Fabbri et al., 2018	29160301	% symptom change	Meta-analysis of GWAS	escGENDEP, STAR*D	1828	rs2095794	/
Fabbri et al., 2018	29160301	% symptom change	Meta-analysis of GWAS	GENDEP, STAR*D	2145	rs28585577	/
Fabbri et al., 2018	29160301	% symptom change	Meta-analysis of GWAS	escGENDEP, STAR*D	1828	rs28585577	/
Fabbri et al., 2018	29160301	% symptom change	Meta-analysis of GWAS	escGENDEP, STAR*D	1828	rs4113049	/
Fabbri et al., 2018	29160301	% symptom change	Meta-analysis of GWAS	escGENDEP, STAR*D	1828	rs4113050	/
Fabbri et al., 2018	29160301	% symptom change	Meta-analysis of GWAS	GENDEP, STAR*D	2145	rs4129350	/
Fabbri et al., 2018	29160301	% symptom change	Meta-analysis of GWAS	escGENDEP, STAR*D	1828	rs4129350	/
Fabbri et al., 2018	29160301	% symptom change	Meta-analysis of GWAS	GENDEP, STAR*D	2145	rs4274014	/
Fabbri et al., 2018	29160301	% symptom change	Meta-analysis of GWAS	escGENDEP, STAR*D	1828	rs4274014	/
Fabbri et al., 2018	29160301	% symptom change	Meta-analysis of GWAS	escGENDEP, STAR*D	1828	rs4287126	/
Fabbri et al., 2018	29160301	% symptom change	Meta-analysis of GWAS	GENDEP, STAR*D	2145	rs4288548	/
Fabbri et al., 2018	29160301	% symptom change	Meta-analysis of GWAS	escGENDEP, STAR*D	1828	rs4288548	/
Fabbri et al., 2018	29160301	% symptom change	Meta-analysis of GWAS	GENDEP, STAR*D	2145	rs4354497	/
Fabbri et al., 2018	29160301	% symptom change	Meta-analysis of GWAS	escGENDEP, STAR*D	1828	rs4354497	/
Fabbri et al., 2018	29160301	% symptom change	Meta-analysis of GWAS	escGENDEP, STAR*D	1828	rs4369181	/
Fabbri et al., 2018	29160301	% symptom change	Meta-analysis of GWAS	escGENDEP, STAR*D	1828	rs4406595	/
Fabbri et al., 2018	29160301	% symptom change	Meta-analysis of GWAS	escGENDEP, STAR*D	1828	rs4415138	/
Fabbri et al., 2018	29160301	% symptom change	Meta-analysis of GWAS	GENDEP, STAR*D	2145	rs4475699	/
Fabbri et al., 2018	29160301	% symptom change	Meta-analysis of GWAS	escGENDEP, STAR*D	1828	rs4475699	/
Fabbri et al., 2018	29160301	% symptom change	Meta-analysis of GWAS	GENDEP, STAR*D	2145	rs4557913	/
Fabbri et al., 2018	29160301	% symptom change	Meta-analysis of GWAS	escGENDEP, STAR*D	1828	rs4557913	/
Fabbri et al., 2018	29160301	% symptom change	Meta-analysis of GWAS	escGENDEP, STAR*D	1828	rs4636406	/
Fabbri et al., 2018	29160301	% symptom change	Meta-analysis of GWAS	GENDEP, STAR*D	2145	rs4650199	/
Fabbri et al., 2018	29160301	% symptom change	Meta-analysis of GWAS	escGENDEP, STAR*D	1828	rs4650199	/
Fabbri et al., 2018	29160301	% symptom change	Meta-analysis of GWAS	escGENDEP, STAR*D	1828	rs4998957	/
Fabbri et al., 2018	29160301	% symptom change	Meta-analysis of GWAS	GENDEP, STAR*D	2145	rs56060088	/
Fabbri et al., 2018	29160301	% symptom change	Meta-analysis of GWAS	escGENDEP, STAR*D	1828	rs56060088	/
Fabbri et al., 2018	29160301	% symptom change	Meta-analysis of GWAS	GENDEP, STAR*D	2145	rs57578100	/
Fabbri et al., 2018	29160301	% symptom change	Meta-analysis of GWAS	escGENDEP, STAR*D	1828	rs57578100	/
Fabbri et al., 2018	29160301	% symptom change	Meta-analysis of GWAS	GENDEP, STAR*D	2145	rs61765511	/
Fabbri et al., 2018	29160301	% symptom change	Meta-analysis of GWAS	escGENDEP, STAR*D	1828	rs61765511	/
Fabbri et al., 2018	29160301	% symptom change	Meta-analysis of GWAS	GENDEP, STAR*D	2145	rs61765512	/
Fabbri et al., 2018	29160301	% symptom change	Meta-analysis of GWAS	escGENDEP, STAR*D	1828	rs61765512	/
Fabbri et al., 2018	29160301	% symptom change	Meta-analysis of GWAS	GENDEP, STAR*D	2145	rs61765513	/
Fabbri et al., 2018	29160301	% symptom change	Meta-analysis of GWAS	escGENDEP, STAR*D	1828	rs61765513	/
Fabbri et al., 2018	29160301	% symptom change	Meta-analysis of GWAS	GENDEP, STAR*D	2145	rs61924265	/
Fabbri et al., 2018	29160301	% symptom change	Meta-analysis of GWAS	GENDEP, STAR*D	2145	rs61924266	/
Fabbri et al., 2018	29160301	% symptom change	Meta-analysis of GWAS	GENDEP, STAR*D	2145	rs61924290	/
Fabbri et al., 2018	29160301	% symptom change	Meta-analysis of GWAS	escGENDEP, STAR*D	1828	rs62203882	/
Fabbri et al., 2018	29160301	% symptom change	Meta-analysis of GWAS	GENDEP, STAR*D	2145	rs6669843	/
Fabbri et al., 2018	29160301	% symptom change	Meta-analysis of GWAS	escGENDEP, STAR*D	1828	rs6669843	/
Fabbri et al., 2018	29160301	% symptom change	Meta-analysis of GWAS	GENDEP, STAR*D	2145	rs6672225	/
Fabbri et al., 2018	29160301	% symptom change	Meta-analysis of GWAS	escGENDEP, STAR*D	1828	rs6672225	/
Fabbri et al., 2018	29160301	% symptom change	Meta-analysis of GWAS	escGENDEP, STAR*D	1828	rs6679389	/
Fabbri et al., 2018	29160301	% symptom change	Meta-analysis of GWAS	GENDEP, STAR*D	2145	rs6682579	/
Fabbri et al., 2018	29160301	% symptom change	Meta-analysis of GWAS	escGENDEP, STAR*D	1828	rs6682579	/
Fabbri et al., 2018	29160301	% symptom change	Meta-analysis of GWAS	GENDEP, STAR*D	2145	rs6684841	/
Fabbri et al., 2018	29160301	% symptom change	Meta-analysis of GWAS	escGENDEP, STAR*D	1828	rs6684841	/
Fabbri et al., 2018	29160301	% symptom change	Meta-analysis of GWAS	GENDEP, STAR*D	2145	rs6692884	/
Fabbri et al., 2018	29160301	% symptom change	Meta-analysis of GWAS	escGENDEP, STAR*D	1828	rs6692884	/
Fabbri et al., 2018	29160301	% symptom change	Meta-analysis of GWAS	GENDEP, STAR*D	2145	rs72819863	/
Fabbri et al., 2018	29160301	% symptom change	Meta-analysis of GWAS	GENDEP, STAR*D	2145	rs72819868	/
Fabbri et al., 2018	29160301	% symptom change	Meta-analysis of GWAS	GENDEP, STAR*D	2145	rs72819870	/
Fabbri et al., 2018	29160301	% symptom change	Meta-analysis of GWAS	GENDEP, STAR*D	2145	rs7518008	/
Fabbri et al., 2018	29160301	% symptom change	Meta-analysis of GWAS	escGENDEP, STAR*D	1828	rs7518008	/
Fabbri et al., 2018	29160301	% symptom change	Meta-analysis of GWAS	GENDEP, STAR*D	2145	rs7519030	/
Fabbri et al., 2018	29160301	% symptom change	Meta-analysis of GWAS	escGENDEP, STAR*D	1828	rs7519030	/
Fabbri et al., 2018	29160301	% symptom change	Meta-analysis of GWAS	GENDEP, STAR*D	2145	rs7521446	/
Fabbri et al., 2018	29160301	% symptom change	Meta-analysis of GWAS	escGENDEP, STAR*D	1828	rs7521446	/
Fabbri et al., 2018	29160301	% symptom change	Meta-analysis of GWAS	GENDEP, STAR*D	2145	rs7553998	/
Fabbri et al., 2018	29160301	% symptom change	Meta-analysis of GWAS	escGENDEP, STAR*D	1828	rs7553998	/
Fabbri et al., 2018	29160301	% symptom change	Meta-analysis of GWAS	escGENDEP, STAR*D	1828	rs7998402	/
Fabbri et al., 2018	29160301	% symptom change	Meta-analysis of GWAS	GENDEP, STAR*D	2145	rs8179409	/
Fabbri et al., 2018	29160301	% symptom change	Meta-analysis of GWAS	escGENDEP, STAR*D	1828	rs8179409	/
Fabbri et al., 2018	29160301	% symptom change	Meta-analysis of GWAS	escGENDEP, STAR*D	1828	rs116692768	ITGA9(0)
Fabbri et al., 2018	29160301	% symptom change	Meta-analysis of GWAS	escGENDEP, STAR*D	1828	rs76191705	NRXN3(0)
Li et al., 2016	27622933	AD response	GWAS	23andMe AESES - NDRI	4536	rs75995702	[]-API5
Li et al., 2016	27622933	AD response	GWAS	23andMe AESES - citalopram or escitalopram	4968	rs34177316	[APBB2]
Li et al., 2016	27622933	AD response	GWAS	23andMe AESES - NDRI	4536	rs77945277	[BAZ1A]
Li et al., 2016	27622933	AD response	GWAS	23andMe AESES AESES - SSRI	9688	rs80164876	[EGFLAM]
Li et al., 2016	27622933	AD response	GWAS	23andMe AESES - SSRI	9688	rs138472420	[GLTSCR1]
Li et al., 2016	27622933	AD response	GWAS	23andMe AESES - SSRI	9688	rs35863382	[SMEK1]
Li et al., 2016	27622933	AD response	GWAS	23andMe AESES - citalopram or escitalopram	4968	rs142484554	[SPSB4]
Li et al., 2016	27622933	AD response	GWAS	23andMe AESES - citalopram or escitalopram	4968	rs80278479	[TFAP2D]
Li et al., 2016	27622933	AD response	GWAS	23andMe AESES - citalopram or escitalopram	4968	rs188843168	[USMG5]
Li et al., 2016	27622933	AD response	GWAS	23andMe AESES AESES - NDRI	4536	rs34102224	CSMD1
Li et al., 2016	27622933	AD response	GWAS	23andMe AESES - citalopram or escitalopram	4968	rs6546604	FAM136A-TGFA
Li et al., 2016	27622933	AD response	GWAS	23andMe AESES - SSRI	9688	rs117198528	LIPG-ACAA2
Li et al., 2016	27622933	AD response	GWAS	23andMe AESES - citalopram or escitalopram	4968	rs111365677	LPPR4-PALMD
Li et al., 2016	27622933	AD response	GWAS	23andMe AESES - NDRI	4536	rs4839421	PROK1-KCNA10
Li et al., 2016	27622933	AD response	GWAS	23andMe AESES - citalopram or escitalopram	4968	rs201921722	SCN3B-ZNF202
Li et al., 2016	27622933	AD response	GWAS	23andMe AESES - SSRI	9688	rs114465512	TOP3B-VPREB1
Li et al., 2016	27622933	AD response	GWAS	23andMe AESES - NDRI	4536	rs1908557	GPRIN3-SNCA
Li et al., 2016	27622933	TRD	GWAS	23andMe AESES	9106	rs10847303	/
Li et al., 2016	27622933	TRD	GWAS	23andMe AESES	9106	rs190662943	[DPP10]
Li et al., 2016	27622933	TRD	GWAS	23andMe AESES	9106	rs73086581	[RNF24]
Li et al., 2016	27622933	TRD	GWAS	23andMe AESES	9106	rs1375194	FAM98A-MYADML
Li et al., 2016	27622933	TRD	GWAS	23andMe AESES	9106	rs75507262	RHOU-RAB4A
Li et al., 2016	27622933	NDRI response	GWAS	23andMe AES	3684	-	-
Li et al., 2016	27622933	SNRI response	Meta-analysis of GWAS	23andMe AES, AESES	7079	rs4955665	MECOM
Li et al., 2016	27622933	SNRI response	GWAS	23andMe AES	4005	-	-
Li et al., 2016	27622933	SNRI response	GWAS	23andMe AESES	4114	-	-
Li et al., 2016	27622933	SSRI response	GWAS	23andMe AES	12477	rs4884091	RNF219-AS1; eQTL variant of RNF219 and RPL31P54
Li et al., 2016	27622933	SSRI response	Meta-analysis of GWAS	23andMe AES, AESES	19740	rs4884091	RNF219-AS1; eQTL variant of RNF219 and RPL31P54
Li et al., 2016	27622933	TRD	Meta-analysis of GWAS	23andMe AES, AESES	25506	rs150245813	ENSG00000226113
Li et al., 2016	27622933	TRD	GWAS	23andMe AES	20382	-	-
Uher et al., 2013	23377640	AD early improvement (2w)	Meta-analysis of GWAS	GENDEP, STAR*D, MARS	2256	rs166040	(PCDH1)
Uher et al., 2013	23377640	AD early improvement (2w)	Meta-analysis of GWAS	GENDEP, STAR*D, MARS (SSRI)	1354	rs10065906	MIR548D2
Uher et al., 2013	23377640	AD early improvement (2w)	Meta-analysis of GWAS	GENDEP, STAR*D, MARS (SSRI)	1354	rs6799788	SCHIP1,IL12A
Uher et al., 2013	23377640	AD early improvement (2w)	Meta-analysis of GWAS	GENDEP, STAR*D, MARS	2256	rs10065906	/
Uher et al., 2013	23377640	AD early improvement (2w)	Meta-analysis of GWAS	GENDEP, STAR*D, MARS	2256	rs10174573	/
Uher et al., 2013	23377640	AD improvement (12w)	Meta-analysis of GWAS	GENDEP, STAR*D, MARS	2256	rs2546057	(KCTD15)
Uher et al., 2013	23377640	AD improvement (12w)	Meta-analysis of GWAS	GENDEP, STAR*D, MARS	2256	rs9601248	(NDFIP2)
Uher et al., 2013	23377640	AD improvement (12w)	Meta-analysis of GWAS	GENDEP, STAR*D, MARS (SSRI)	1354	rs398426	CHST8,KCTD15
Uher et al., 2013	23377640	AD improvement (12w)	Meta-analysis of GWAS	GENDEP, STAR*D, MARS (SSRI)	1354	rs1034394	DMD
Uher et al., 2013	23377640	AD improvement (12w)	Meta-analysis of GWAS	GENDEP, STAR*D, MARS (SSRI)	1354	rs17538444	ENOX1
Uher et al., 2013	23377640	AD improvement (12w)	Meta-analysis of GWAS	GENDEP, STAR*D, MARS	2256	rs264272	FAM38B
Uher et al., 2013	23377640	AD improvement (12w)	Meta-analysis of GWAS	GENDEP, STAR*D, MARS (SSRI)	1354	rs264272	FAM38B
Uher et al., 2013	23377640	AD improvement (12w)	Meta-analysis of GWAS	GENDEP, STAR*D, MARS (SSRI)	1354	rs6598266	LYSMD4,C15orf51
Uher et al., 2013	23377640	AD improvement (12w)	Meta-analysis of GWAS	GENDEP, STAR*D, MARS	2256	rs17634917	RFPL4A
Uher et al., 2013	23377640	AD improvement (12w)	Meta-analysis of GWAS	GENDEP, STAR*D, MARS	2256	rs12410462	/
Uher et al., 2013	23377640	AD improvement (12w)	Meta-analysis of GWAS	GENDEP, STAR*D, MARS	2256	rs17651119	MYO10
Uher et al., 2013	23377640	AD improvement (2w)	Meta-analysis of GWAS	GENDEP, STAR*D, MARS	2256	rs10065906	(MIR548D2)
Uher et al., 2013	23377640	AD improvement (2w)	Meta-analysis of GWAS	GENDEP, STAR*D, MARS (SSRI)	1354	rs4585146	FGF12
Uher et al., 2013	23377640	AD improvement (2w)	Meta-analysis of GWAS	GENDEP, STAR*D, MARS	2256	rs7174755	ITGA11
Uher et al., 2013	23377640	AD improvement (2w)	Meta-analysis of GWAS	GENDEP, STAR*D, MARS (SSRI)	1354	rs10484358	MYLIP,GMPR,ATXN1
Uher et al., 2013	23377640	AD improvement (2w)	Meta-analysis of GWAS	GENDEP, STAR*D, MARS (SSRI)	1354	rs17692896	PDCD5,ANKRD27,RGS9BP,NUDT19
Uher et al., 2013	23377640	AD improvement (2w)	Meta-analysis of GWAS	GENDEP, STAR*D, MARS (SSRI)	1354	rs7174755	PIAS1,CALML4,CLN6,FEM1B,ITGA11
Uher et al., 2013	23377640	AD improvement (2w)	Meta-analysis of GWAS	GENDEP, STAR*D, MARS (SSRI)	1354	rs1673101	RASA1,CCNH
Uher et al., 2013	23377640	AD improvement (2w)	Meta-analysis of GWAS	GENDEP, STAR*D, MARS	2256	rs12513663	/
Uher et al., 2013	23377640	AD improvement (2w)	Meta-analysis of GWAS	GENDEP, STAR*D, MARS (SSRI)	1354	rs12054895	/
Uher et al., 2013	23377640	AD remission (12w)	Meta-analysis of GWAS	GENDEP, STAR*D, MARS	2256	rs17710780	(FLJ41603)
Uher et al., 2013	23377640	AD remission (12w)	Meta-analysis of GWAS	GENDEP, STAR*D, MARS (SSRI)	1354	rs364477	DMRT1,DMRT3
Uher et al., 2013	23377640	AD remission (12w)	Meta-analysis of GWAS	GENDEP, STAR*D, MARS (SSRI)	1354	rs8012941	KCNH5
Uher et al., 2013	23377640	AD remission (12w)	Meta-analysis of GWAS	GENDEP, STAR*D, MARS (SSRI)	1354	rs1525293	WBSCR17
Uher et al., 2013	23377640	AD remission (12w)	Meta-analysis of GWAS	GENDEP, STAR*D, MARS	2256	rs2125000	/
Uher et al., 2013	23377640	AD remission (12w)	Meta-analysis of GWAS	GENDEP, STAR*D, MARS	2256	rs9466930	/
Hunter et al., 2013	23726668	Sustained AD response	GWAS	STAR*D citalopram - sustained vs unsustaind response	1116	rs10492002	ACSS3
Tansey et al., 2012	23091423	% change in symptom severity	GWAS	GENDEP, GENDOP, GODS - SRI (escitalopram, citalopram)	1222	rs1493451	ADAMTS6
Tansey et al., 2012	23091423	% change in symptom severity	GWAS	GENDEP, GENDOP, GODS - SRI (escitalopram, citalopram)	1222	rs7708972	ADAMTS6
Tansey et al., 2012	23091423	% change in symptom severity	GWAS	GENDEP, GENDOP, GODS - SRI (escitalopram, citalopram)	1222	rs10783282	ADCY6
Tansey et al., 2012	23091423	% change in symptom severity	Meta-analysis of GWAS	GENDEP, GENDOP, GODS, STAR*D	2897	rs10426076	FCGBP
Tansey et al., 2012	23091423	% change in symptom severity	Meta-analysis of GWAS	GENDEP, GENDOP, GODS, STAR*D	2897	rs10426624	FCGBP
Tansey et al., 2012	23091423	% change in symptom severity	GWAS	GENDEP, GENDOP, GODS - NRI (nortriptyline, reboxetine)	568	rs12534474	HIBADH
Tansey et al., 2012	23091423	% change in symptom severity	GWAS	GENDEP, GENDOP, GODS - NRI (nortriptyline, reboxetine)	568	rs13237776	HIBADH
Tansey et al., 2012	23091423	% change in symptom severity	GWAS	GENDEP, GENDOP, GODS	1790	rs11624702	MDGA2
Tansey et al., 2012	23091423	% change in symptom severity	GWAS	GENDEP, GENDOP, GODS	1790	rs10818702	OR1J2
Tansey et al., 2012	23091423	% change in symptom severity	GWAS	GENDEP, GENDOP, GODS - SRI vs NRI	949	rs1409414	RXRG
Tansey et al., 2012	23091423	% change in symptom severity	GWAS	GENDEP, GENDOP, GODS - SRI vs NRI	949	rs7549782	RXRG
Tansey et al., 2012	23091423	% change in symptom severity	GWAS	GENDEP, GENDOP, GODS - SRI vs NRI	949	rs1455773	ST8SIA2, C15orf32
Tansey et al., 2012	23091423	% change in symptom severity	GWAS	GENDEP, GENDOP, GODS - SRI vs NRI	949	rs2279447	ST8SIA2, C15orf32
Tansey et al., 2012	23091423	% change in symptom severity	Meta-analysis of GWAS	GENDEP, GENDOP, GODS, STAR*D - SRI	2329	rs7859751	ZNF782
Tansey et al., 2012	23091423	% change in symptom severity	Meta-analysis of GWAS	GENDEP, GENDOP, GODS, STAR*D - SRI	2329	rs7870795	ZNF782
Tansey et al., 2012	23091423	% change in symptom severity	GWAS	GENDEP, GENDOP, GODS - SRI (escitalopram, citalopram)	1222	rs10515893	/
Tansey et al., 2012	23091423	% change in symptom severity	Meta-analysis of GWAS	GENDEP, GENDOP, GODS, STAR*D	2897	rs1426651	/
Tansey et al., 2012	23091423	% change in symptom severity	Meta-analysis of GWAS	GENDEP, GENDOP, GODS, STAR*D - SRI	2329	rs1426651	/
Tansey et al., 2012	23091423	% change in symptom severity	GWAS	GENDEP, GENDOP, GODS - SRI vs NRI	949	rs280060	/
Tansey et al., 2012	23091423	% change in symptom severity	GWAS	GENDEP, GENDOP, GODS - SRI vs NRI	949	rs4424090	/
Tansey et al., 2012	23091423	% change in symptom severity	Meta-analysis of GWAS	GENDEP, GENDOP, GODS, STAR*D	2897	rs6040194	/
Tansey et al., 2012	23091423	% change in symptom severity	Meta-analysis of GWAS	GENDEP, GENDOP, GODS, STAR*D	2897	rs6598518	/
Uher et al., 2010	20360315	% change in symptom severity	GWAS	GENDEP - escitalopram	394	rs1126757	IL11
Uher et al., 2010	20360315	% change in symptom severity	GWAS	GENDEP - nortriptyline	312	rs4651156	RGL1
Uher et al., 2010	20360315	% change in symptom severity	GWAS	GENDEP - nortriptyline	312	rs9425322	RGL1
Uher et al., 2010	20360315	% change in symptom severity	GWAS	GENDEP - escitalopram vs nortriptiline	394	rs11666579	SLC27A1
Uher et al., 2010	20360315	% change in symptom severity	GWAS	GENDEP - escitalopram vs nortriptiline	394	rs1013696	/
Uher et al., 2010	20360315	% change in symptom severity	GWAS	GENDEP	706	rs11598854	/
Uher et al., 2010	20360315	% change in symptom severity	GWAS	GENDEP	706	rs16920624	/
Uher et al., 2010	20360315	% change in symptom severity	GWAS	GENDEP	706	rs2136093	/
Uher et al., 2010	20360315	% change in symptom severity	GWAS	GENDEP	706	rs2136094	/
Uher et al., 2010	20360315	% change in symptom severity	GWAS	GENDEP	706	rs6701608	/
Uher et al., 2010	20360315	% change in symptom severity	GWAS	GENDEP	706	rs7081156	/
Uher et al., 2010	20360315	% change in symptom severity	GWAS	GENDEP - nortriptyline	312	rs2500535	UST
Clinical dimensions
Goodman et al., 2024	38352337	Sleep (SHS-ADD)	GWAS	UKB	413904	rs75607302	PPID/FNIP2
Goodman et al., 2024	38352337	Sleep (SHS-ADD)	GWAS	UKB	413904	rs10808575	AC068570.1/LINC009
Goodman et al., 2024	38352337	Sleep (SHS-ADD)	GWAS	UKB	413904	rs12257317	UBE2V2P1/MALRD1
Goodman et al., 2024	38352337	Sleep (SHS-ADD)	GWAS	UKB	413904	rs7924036	JMJD1C
Goodman et al., 2024	38352337	Sleep (SHS-ADD)	GWAS	UKB	413904	rs72896891	SETBP1
Goodman et al., 2024	38352337	Sleep (SHS-ADD)	GWAS	UKB	413904	rs59699209	AC128653.1/NIPA2P2
Goodman et al., 2024	38352337	Sleep (SHS-ADD)	GWAS	UKB	413904	7:42269697_CGGGGG_C	GLI3
Goodman et al., 2024	38352337	Sleep (SHS-ADD)	GWAS	UKB	413904	rs78232475	DDI2
Goodman et al., 2024	38352337	Sleep (SHS-ADD)	GWAS	UKB	413904	rs1284365	S100PBP
Goodman et al., 2024	38352337	Sleep (SHS-ADD)	GWAS	UKB	413904	rs7547493	AK5
Goodman et al., 2024	38352337	Sleep (SHS-ADD)	GWAS	UKB	413904	rs12089815	BARHL2/RP4-665J23.1
Goodman et al., 2024	38352337	Sleep (SHS-ADD)	GWAS	UKB	413904	1:182548483_GC_G	RNASEL
Goodman et al., 2024	38352337	Sleep (SHS-ADD)	GWAS	UKB	413904	rs2644135	IPO9/SHISA4
Goodman et al., 2024	38352337	Sleep (SHS-ADD)	GWAS	UKB	413904	rs112156038	STON1-GTF2A1L
Goodman et al., 2024	38352337	Sleep (SHS-ADD)	GWAS	UKB	413904	rs113851554	MEIS1
Goodman et al., 2024	38352337	Sleep (SHS-ADD)	GWAS	UKB	413904	rs12464452	AC103881.1/AC062032.1
Goodman et al., 2024	38352337	Sleep (SHS-ADD)	GWAS	UKB	413904	rs1404481	RP4-672N11.1/RP4-555D20.3
Goodman et al., 2024	38352337	Sleep (SHS-ADD)	GWAS	UKB	413904	rs151321348	UQCRC1/TMEM89
Goodman et al., 2024	38352337	Sleep (SHS-ADD)	GWAS	UKB	413904	rs1046953	SEMA3F
Goodman et al., 2024	38352337	Sleep (SHS-ADD)	GWAS	UKB	413904	rs11924337	ROBO2
Goodman et al., 2024	38352337	Sleep (SHS-ADD)	GWAS	UKB	413904	rs73173738	RP11-384F7.1
Goodman et al., 2024	38352337	Sleep (SHS-ADD)	GWAS	UKB	413904	rs34545682	RP11-362A9.3
Goodman et al., 2024	38352337	Sleep (SHS-ADD)	GWAS	UKB	413904	rs548522421	SMAD5-AS1/SMAD5
Goodman et al., 2024	38352337	Sleep (SHS-ADD)	GWAS	UKB	413904	rs4467770	HIVEP1
Goodman et al., 2024	38352337	Sleep (SHS-ADD)	GWAS	UKB	413904	rs9395520	PHACTR1
Goodman et al., 2024	38352337	Sleep (SHS-ADD)	GWAS	UKB	413904	rs10947690	MDGA1
Goodman et al., 2024	38352337	Sleep (SHS-ADD)	GWAS	UKB	413904	rs544654494	USP49
Goodman et al., 2024	38352337	Sleep (SHS-ADD)	GWAS	UKB	413904	rs62436127	MTRF1L
Goodman et al., 2024	38352337	Sleep (SHS-ADD)	GWAS	UKB	413904	rs375365692	FBXL13
Goodman et al., 2024	38352337	Sleep (SHS-ADD)	GWAS	UKB	413904	rs7848888	RMI1/RP11-158D2.2
Goodman et al., 2024	38352337	Sleep (SHS-ADD)	GWAS	UKB	413904	rs2799463	DENND1A
Goodman et al., 2024	38352337	Sleep (SHS-ADD)	GWAS	UKB	413904	11:47376098_GTCATCA_G	MYBPC3/SPI1
Goodman et al., 2024	38352337	Sleep (SHS-ADD)	GWAS	UKB	413904	rs1967203	TYR/NOX4
Goodman et al., 2024	38352337	Sleep (SHS-ADD)	GWAS	UKB	413904	rs9668790	RP13-7D7.1/RP11-125N22.4
Goodman et al., 2024	38352337	Sleep (SHS-ADD)	GWAS	UKB	413904	13:53832608_AT_A	RN7SL618P/AL450423.1
Goodman et al., 2024	38352337	Sleep (SHS-ADD)	GWAS	UKB	413904	rs352241	SRSF1P1/KLHL1
Goodman et al., 2024	38352337	Sleep (SHS-ADD)	GWAS	UKB	413904	rs12927162	CASC16
Goodman et al., 2024	38352337	Sleep (SHS-ADD)	GWAS	UKB	413904	rs2587889	GNAO1
Goodman et al., 2024	38352337	Sleep (SHS-ADD)	GWAS	UKB	413904	rs745973361	RP11-354I13.1/GNPATP
Goodman et al., 2024	38352337	Sleep (SHS-ADD)	GWAS	UKB	413904	rs545274236	HSF5
Goodman et al., 2024	38352337	Sleep (SHS-ADD)	GWAS	UKB	413904	rs11083105	WBP2P1/RP11-958F21.3
Goodman et al., 2024	38352337	Sleep (SHS-ADD)	GWAS	UKB	413904	rs1786745	RN7SL97P/RP11-737G21.1
Goodman et al., 2024	38352337	Sleep (SHS-ADD)	GWAS	UKB	413904	rs784258	RP11-397A16.1
Goodman et al., 2024	38352337	Sleep (SHS-ADD)	GWAS	UKB	413904	rs2253763	ADARB1
Goodman et al., 2024	38352337	Sleep (SHS-ADD)	GWAS	UKB	413904	rs71327107	RBX1/Y_RNA
Goodman et al., 2024	38352337	Sleep (SHS-PC1)	GWAS	UKB	413904	rs12759956	RP11-
Goodman et al., 2024	38352337	Sleep (SHS-PC1)	GWAS	UKB	413904	rs12470733	C2orf47/SPATS2L
Goodman et al., 2024	38352337	Sleep (SHS-PC1)	GWAS	UKB	413904	rs1571582	RP11-394D2.1/RP11-
Goodman et al., 2024	38352337	Sleep (SHS-PC1)	GWAS	UKB	413904	rs201449027	KLRG1/RP11-
Goodman et al., 2024	38352337	Sleep (SHS-PC1)	GWAS	UKB	413904	rs4559781	NPM1P4/GSX1
Goodman et al., 2024	38352337	Sleep (SHS-PC1)	GWAS	UKB	413904	rs139221256	ZNF592/ALPK3
Goodman et al., 2024	38352337	Sleep (SHS-PC1)	GWAS	UKB	413904	rs12601771	ANKFY1
Goodman et al., 2024	38352337	Sleep (SHS-PC1)	GWAS	UKB	413904	rs8074498*	ASPSCR1
Goodman et al., 2024	38352337	Sleep (SHS-PC1)	GWAS	UKB	413904	rs9610500	MAPK1
Goodman et al., 2024	38352337	Sleep (SHS-PC1)	GWAS	UKB	413904	rs12731185	RP4-675G8.2/RP4-675G8.3
Goodman et al., 2024	38352337	Sleep (SHS-PC1)	GWAS	UKB	413904	3:143692962_GT_G	C3orf58
Goodman et al., 2024	38352337	Sleep (SHS-PC1)	GWAS	UKB	413904	rs1627982	HCG4B
Goodman et al., 2024	38352337	Sleep (SHS-PC1)	GWAS	UKB	413904	rs11203766	OR7E10P/MIR5692A1
Goodman et al., 2024	38352337	Sleep (SHS-PC1)	GWAS	UKB	413904	rs528641599	RP11-871F6.2/RP11-871F6.3
Goodman et al., 2024	38352337	Sleep (SHS-PC1)	GWAS	UKB	413904	rs570205946	ITM2B/LINC00441
Goodman et al., 2024	38352337	Sleep (SHS-PC1)	GWAS	UKB	413904	rs117930259	RP11-219B17.1/CTD-2501E16.2/RORA
Goodman et al., 2024	38352337	Sleep (SHS-PC1)	GWAS	UKB	413904	rs4778665	EFTUD1
Goodman et al., 2024	38352337	Sleep (SHS-PC1)	GWAS	UKB	413904	rs915947	CYP2D7P
Goodman et al., 2024	38352337	Sleep (SHS-PC1)	GWAS	UKB	413904	rs941530	C1orf222
Goodman et al., 2024	38352337	Sleep (SHS-PC1)	GWAS	UKB	413904	rs915416	C1orf94/RP4-657M3.2
Goodman et al., 2024	38352337	Sleep (SHS-PC1)	GWAS	UKB	413904	rs540431	DAB1
Goodman et al., 2024	38352337	Sleep (SHS-PC1)	GWAS	UKB	413904	rs549871681	PDE4B
Goodman et al., 2024	38352337	Sleep (SHS-PC1)	GWAS	UKB	413904	rs34305371	NEGR1
Goodman et al., 2024	38352337	Sleep (SHS-PC1)	GWAS	UKB	413904	rs2820292	IPO9-AS1/NAV1
Goodman et al., 2024	38352337	Sleep (SHS-PC1)	GWAS	UKB	413904	rs4080622	DNMT3A
Goodman et al., 2024	38352337	Sleep (SHS-PC1)	GWAS	UKB	413904	2:58883856_AT_A	LINC01122
Goodman et al., 2024	38352337	Sleep (SHS-PC1)	GWAS	UKB	413904	rs113851554	MEIS1
Goodman et al., 2024	38352337	Sleep (SHS-PC1)	GWAS	UKB	413904	2:104444894_ATT_A	AC018880.2/AC013727.1
Goodman et al., 2024	38352337	Sleep (SHS-PC1)	GWAS	UKB	413904	rs62158170	PAX8/IGKV1OR2-108
Goodman et al., 2024	38352337	Sleep (SHS-PC1)	GWAS	UKB	413904	rs12464452	AC103881.1/AC062032.1
Goodman et al., 2024	38352337	Sleep (SHS-PC1)	GWAS	UKB	413904	rs4577309	MFSD6
Goodman et al., 2024	38352337	Sleep (SHS-PC1)	GWAS	UKB	413904	rs883212	RP4-672N11.1/RP4-555D20.3
Goodman et al., 2024	38352337	Sleep (SHS-PC1)	GWAS	UKB	413904	rs6808104	IP6K2
Goodman et al., 2024	38352337	Sleep (SHS-PC1)	GWAS	UKB	413904	rs4688760	RBM6
Goodman et al., 2024	38352337	Sleep (SHS-PC1)	GWAS	UKB	413904	rs76368477	RP11-231I13.2/COX6CP6
Goodman et al., 2024	38352337	Sleep (SHS-PC1)	GWAS	UKB	413904	rs574975354	AC108696.1/AC107025.1
Goodman et al., 2024	38352337	Sleep (SHS-PC1)	GWAS	UKB	413904	3:158434375_CT_C	RARRES1
Goodman et al., 2024	38352337	Sleep (SHS-PC1)	GWAS	UKB	413904	rs142530346	RNU5A-2P/RASGEF1B
Goodman et al., 2024	38352337	Sleep (SHS-PC1)	GWAS	UKB	413904	rs13109404	BANK1
Goodman et al., 2024	38352337	Sleep (SHS-PC1)	GWAS	UKB	413904	rs9999238	RP11-729M20.1/CXXC4
Goodman et al., 2024	38352337	Sleep (SHS-PC1)	GWAS	UKB	413904	rs2270914	SLC6A3
Goodman et al., 2024	38352337	Sleep (SHS-PC1)	GWAS	UKB	413904	rs11422559	RP11-35O7.1/CTD-2029E14.1
Goodman et al., 2024	38352337	Sleep (SHS-PC1)	GWAS	UKB	413904	rs10942657	RP11-348J24.2
Goodman et al., 2024	38352337	Sleep (SHS-PC1)	GWAS	UKB	413904	rs71755870	GIN1
Goodman et al., 2024	38352337	Sleep (SHS-PC1)	GWAS	UKB	413904	rs13164158	RP11-6N13.1
Goodman et al., 2024	38352337	Sleep (SHS-PC1)	GWAS	UKB	413904	rs7711696	SMAD5
Goodman et al., 2024	38352337	Sleep (SHS-PC1)	GWAS	UKB	413904	rs13180072	PCDH1/AC005740.3
Goodman et al., 2024	38352337	Sleep (SHS-PC1)	GWAS	UKB	413904	rs74837937	MIR548A1/RP11-254A17.1
Goodman et al., 2024	38352337	Sleep (SHS-PC1)	GWAS	UKB	413904	rs2428500	HCP5/MICB
Goodman et al., 2024	38352337	Sleep (SHS-PC1)	GWAS	UKB	413904	rs1547668	MLN/LINC01016
Goodman et al., 2024	38352337	Sleep (SHS-PC1)	GWAS	UKB	413904	rs762048894	CUL9
Goodman et al., 2024	38352337	Sleep (SHS-PC1)	GWAS	UKB	413904	rs9475036	RNU6-1023P/RP11-524H19.2
Goodman et al., 2024	38352337	Sleep (SHS-PC1)	GWAS	UKB	413904	6:101246872_CAA_C	ASCC3
Goodman et al., 2024	38352337	Sleep (SHS-PC1)	GWAS	UKB	413904	rs364663	LIN28B
Goodman et al., 2024	38352337	Sleep (SHS-PC1)	GWAS	UKB	413904	rs9374560	RP11-282C5.1/FRK
Goodman et al., 2024	38352337	Sleep (SHS-PC1)	GWAS	UKB	413904	rs6954783	CYP2W1/C7orf50
Goodman et al., 2024	38352337	Sleep (SHS-PC1)	GWAS	UKB	413904	rs766398643	MAD1L1
Goodman et al., 2024	38352337	Sleep (SHS-PC1)	GWAS	UKB	413904	rs8180817	FOXP2
Goodman et al., 2024	38352337	Sleep (SHS-PC1)	GWAS	UKB	413904	rs370416527	CHCHD3
Goodman et al., 2024	38352337	Sleep (SHS-PC1)	GWAS	UKB	413904	rs907183	MFHAS1
Goodman et al., 2024	38352337	Sleep (SHS-PC1)	GWAS	UKB	413904	rs73219289	SGCZ
Goodman et al., 2024	38352337	Sleep (SHS-PC1)	GWAS	UKB	413904	rs17286447	RP1-84O15.2/RP11-431M3.2
Goodman et al., 2024	38352337	Sleep (SHS-PC1)	GWAS	UKB	413904	rs4588900	RP11-531A24.3/TERF1
Goodman et al., 2024	38352337	Sleep (SHS-PC1)	GWAS	UKB	413904	rs147527781	ELAVL2
Goodman et al., 2024	38352337	Sleep (SHS-PC1)	GWAS	UKB	413904	10:21920861_GT_G	MLLT10
Goodman et al., 2024	38352337	Sleep (SHS-PC1)	GWAS	UKB	413904	rs58989795	ALDH7A1P4/RP11-436D10.3
Goodman et al., 2024	38352337	Sleep (SHS-PC1)	GWAS	UKB	413904	rs71016384	TMEM180
Goodman et al., 2024	38352337	Sleep (SHS-PC1)	GWAS	UKB	413904	rs11039216	RP11-750H9.5
Goodman et al., 2024	38352337	Sleep (SHS-PC1)	GWAS	UKB	413904	rs75878449	RP11-755E23.3
Goodman et al., 2024	38352337	Sleep (SHS-PC1)	GWAS	UKB	413904	rs180322	BUD13
Goodman et al., 2024	38352337	Sleep (SHS-PC1)	GWAS	UKB	413904	rs324017	NAB2
Goodman et al., 2024	38352337	Sleep (SHS-PC1)	GWAS	UKB	413904	12:109883169_TTTCC_T	MYO1H
Goodman et al., 2024	38352337	Sleep (SHS-PC1)	GWAS	UKB	413904	rs67128127	RN7SL618P/AL450423.1
Goodman et al., 2024	38352337	Sleep (SHS-PC1)	GWAS	UKB	413904	rs9516693	HS6ST3
Goodman et al., 2024	38352337	Sleep (SHS-PC1)	GWAS	UKB	413904	rs61955661	AL136302.1/SNORD44
Goodman et al., 2024	38352337	Sleep (SHS-PC1)	GWAS	UKB	413904	rs11621908	ADCK1/FRDAP
Goodman et al., 2024	38352337	Sleep (SHS-PC1)	GWAS	UKB	413904	rs11434404	SEMA6D
Goodman et al., 2024	38352337	Sleep (SHS-PC1)	GWAS	UKB	413904	rs8024150	PML/DNM1P33
Goodman et al., 2024	38352337	Sleep (SHS-PC1)	GWAS	UKB	413904	rs17507216	RP11-379H8.1/CPEB1
Goodman et al., 2024	38352337	Sleep (SHS-PC1)	GWAS	UKB	413904	rs11077041	RP11-420N3.2/RBFOX1
Goodman et al., 2024	38352337	Sleep (SHS-PC1)	GWAS	UKB	413904	rs11643772	PDILT
Goodman et al., 2024	38352337	Sleep (SHS-PC1)	GWAS	UKB	413904	rs8047587	FTO
Goodman et al., 2024	38352337	Sleep (SHS-PC1)	GWAS	UKB	413904	rs59779556	CTD-2050B12.2/GNAO1
Goodman et al., 2024	38352337	Sleep (SHS-PC1)	GWAS	UKB	413904	rs61124172	RP11-51O6.1/CDH8
Goodman et al., 2024	38352337	Sleep (SHS-PC1)	GWAS	UKB	413904	rs60261761	DNAH2
Goodman et al., 2024	38352337	Sleep (SHS-PC1)	GWAS	UKB	413904	rs4589616	PDLIM1P2/RP11-728E14.3
Goodman et al., 2024	38352337	Sleep (SHS-PC1)	GWAS	UKB	413904	17:43226477_TC_T	HEXIM1
Goodman et al., 2024	38352337	Sleep (SHS-PC1)	GWAS	UKB	413904	rs9911944	EFCAB13/CTD-2026D20.2
Goodman et al., 2024	38352337	Sleep (SHS-PC1)	GWAS	UKB	413904	rs3794891	TCF4
Goodman et al., 2024	38352337	Sleep (SHS-PC1)	GWAS	UKB	413904	rs33442	ZNF536
Goodman et al., 2024	38352337	Sleep (SHS-PC1)	GWAS	UKB	413904	22:41805389_GAA_G	TEF/CTA-223H9.9
Goodman et al., 2024	38352337	Sleep (SHS-PC2)	GWAS	UKB	413904	rs2821226	OPTC/ATP2B4
Goodman et al., 2024	38352337	Sleep (SHS-PC2)	GWAS	UKB	413904	rs17559978	SEMA3D
Goodman et al., 2024	38352337	Sleep (SHS-PC2)	GWAS	UKB	413904	rs11111069	DRAM1
Goodman et al., 2024	38352337	Sleep (SHS-PC2)	GWAS	UKB	413904	rs113851179	LA16c-431H6.6/HN1L
Goodman et al., 2024	38352337	Sleep (SHS-PC2)	GWAS	UKB	413904	rs12979056	FCHO1
Goodman et al., 2024	38352337	Sleep (SHS-PC2)	GWAS	UKB	413904	rs3788337	RTDR1
Goodman et al., 2024	38352337	Sleep (SHS-PC2)	GWAS	UKB	413904	rs1610263	COL8A1
Goodman et al., 2024	38352337	Sleep (SHS-PC2)	GWAS	UKB	413904	rs185448318	ATRNL1
Goodman et al., 2024	38352337	Sleep (SHS-PC2)	GWAS	UKB	413904	rs806292	DLEU1
Goodman et al., 2024	38352337	Sleep (SHS-PC2)	GWAS	UKB	413904	rs62016897	CTD-2576F9.2/RP11-255M2.1
Goodman et al., 2024	38352337	Sleep (SHS-PC2)	GWAS	UKB	413904	rs78465403	PIEZO1
Goodman et al., 2024	38352337	Sleep (SHS-PC2)	GWAS	UKB	413904	rs1337906	RP5-1097P24.1/RP5-828K20.1
Goodman et al., 2024	38352337	Sleep (SHS-PC2)	GWAS	UKB	413904	rs778494849	ASCC2/MTMR3
Goodman et al., 2024	38352337	Sleep (SHS-PC2)	GWAS	UKB	413904	rs12140153	INADL
Goodman et al., 2024	38352337	Sleep (SHS-PC2)	GWAS	UKB	413904	rs61839878	C1orf65/CAPN8
Goodman et al., 2024	38352337	Sleep (SHS-PC2)	GWAS	UKB	413904	rs113696815	AC018880.2/AC013727.1
Goodman et al., 2024	38352337	Sleep (SHS-PC2)	GWAS	UKB	413904	rs62158213	PAX8/IGKV1OR2-108
Goodman et al., 2024	38352337	Sleep (SHS-PC2)	GWAS	UKB	413904	rs72902175	AC073551.1/NR4A2
Goodman et al., 2024	38352337	Sleep (SHS-PC2)	GWAS	UKB	413904	rs74712018	CADM2
Goodman et al., 2024	38352337	Sleep (SHS-PC2)	GWAS	UKB	413904	rs2168716	HSPE1P19/RNU6-488P
Goodman et al., 2024	38352337	Sleep (SHS-PC2)	GWAS	UKB	413904	rs34811474	ANAPC4
Goodman et al., 2024	38352337	Sleep (SHS-PC2)	GWAS	UKB	413904	rs13117122	RP11-422J15.1/RP11-521E5.1
Goodman et al., 2024	38352337	Sleep (SHS-PC2)	GWAS	UKB	413904	rs11948444	C5orf66
Goodman et al., 2024	38352337	Sleep (SHS-PC2)	GWAS	UKB	413904	rs4311433	NSD1
Goodman et al., 2024	38352337	Sleep (SHS-PC2)	GWAS	UKB	413904	rs9396089	GFRAL/HMGCLL1
Goodman et al., 2024	38352337	Sleep (SHS-PC2)	GWAS	UKB	413904	rs151152284	AL356131.1/MTRNR2L9
Goodman et al., 2024	38352337	Sleep (SHS-PC2)	GWAS	UKB	413904	rs2207944	SNAP91
Goodman et al., 2024	38352337	Sleep (SHS-PC2)	GWAS	UKB	413904	rs9397587	RGS17
Goodman et al., 2024	38352337	Sleep (SHS-PC2)	GWAS	UKB	413904	rs79520962	SND1/LRRC4
Goodman et al., 2024	38352337	Sleep (SHS-PC2)	GWAS	UKB	413904	rs6951416	EXOC4
Goodman et al., 2024	38352337	Sleep (SHS-PC2)	GWAS	UKB	413904	8:71482998_TA_T	RP11-333A23.2/TRAM1
Goodman et al., 2024	38352337	Sleep (SHS-PC2)	GWAS	UKB	413904	rs285815	RP11-127H5.1
Goodman et al., 2024	38352337	Sleep (SHS-PC2)	GWAS	UKB	413904	rs34507484	RP11-184B22.2/MAPKAP1
Goodman et al., 2024	38352337	Sleep (SHS-PC2)	GWAS	UKB	413904	rs527746492	BTRC
Goodman et al., 2024	38352337	Sleep (SHS-PC2)	GWAS	UKB	413904	rs35523291	NOLC1/ELOVL3
Goodman et al., 2024	38352337	Sleep (SHS-PC2)	GWAS	UKB	413904	rs12414708	CTBP2
Goodman et al., 2024	38352337	Sleep (SHS-PC2)	GWAS	UKB	413904	rs11030084	BDNF-AS/LINC00678
Goodman et al., 2024	38352337	Sleep (SHS-PC2)	GWAS	UKB	413904	rs662094	CTSF/CCDC87
Goodman et al., 2024	38352337	Sleep (SHS-PC2)	GWAS	UKB	413904	12:24007994_GA_G	SOX5
Goodman et al., 2024	38352337	Sleep (SHS-PC2)	GWAS	UKB	413904	rs10784447	MSRB3
Goodman et al., 2024	38352337	Sleep (SHS-PC2)	GWAS	UKB	413904	rs1599767	KSR2
Goodman et al., 2024	38352337	Sleep (SHS-PC2)	GWAS	UKB	413904	rs592333	DLEU7
Goodman et al., 2024	38352337	Sleep (SHS-PC2)	GWAS	UKB	413904	rs73245954	RP11-148E17.1/RP11-562L8.1
Goodman et al., 2024	38352337	Sleep (SHS-PC2)	GWAS	UKB	413904	rs31406	NRXN3
Goodman et al., 2024	38352337	Sleep (SHS-PC2)	GWAS	UKB	413904	rs2411440	NPIPB8
Goodman et al., 2024	38352337	Sleep (SHS-PC2)	GWAS	UKB	413904	rs8073466	SKAP1
Goodman et al., 2024	38352337	Sleep (SHS-PC2)	GWAS	UKB	413904	rs4815915	CASC20/RP5-859D4.3
Goodman et al., 2024	38352337	Sleep (SHS-PC2)	GWAS	UKB	413904	rs2836950	BRWD1
Goodman et al., 2024	38352337	Sleep (SHS-PC3)	GWAS	UKB	413904	rs56049037	AVL9
Goodman et al., 2024	38352337	Sleep (SHS-PC3)	GWAS	UKB	413904	8:11053467_	8:11053467
Goodman et al., 2024	38352337	Sleep (SHS-PC3)	GWAS	UKB	413904	rs11494758	KLRG1
Goodman et al., 2024	38352337	Sleep (SHS-PC3)	GWAS	UKB	413904	rs71272625	LINGO1/CSPG4P13
Goodman et al., 2024	38352337	Sleep (SHS-PC3)	GWAS	UKB	413904	rs11373181	TCF20
Goodman et al., 2024	38352337	Sleep (SHS-PC3)	GWAS	UKB	413904	rs6658041	ELTD1
Goodman et al., 2024	38352337	Sleep (SHS-PC3)	GWAS	UKB	413904	rs2102506	SSR3/TIPARP-AS1
Goodman et al., 2024	38352337	Sleep (SHS-PC3)	GWAS	UKB	413904	4:118318590_CAT_C	AC113617.1/RPSAP35
Goodman et al., 2024	38352337	Sleep (SHS-PC3)	GWAS	UKB	413904	5:26026790_ACAT_A	RNU4-43P/RP11-351N6.1
Goodman et al., 2024	38352337	Sleep (SHS-PC3)	GWAS	UKB	413904	rs4278149	RP1-84O15.2/RP11-258J10.1
Goodman et al., 2024	38352337	Sleep (SHS-PC3)	GWAS	UKB	413904	rs12798330*	ZDHHC13
Goodman et al., 2024	38352337	Sleep (SHS-PC3)	GWAS	UKB	413904	rs10149448	RNU6ATAC28P/RP11-22K10.1
Goodman et al., 2024	38352337	Sleep (SHS-PC3)	GWAS	UKB	413904	rs2701524	MEIS2
Goodman et al., 2024	38352337	Sleep (SHS-PC3)	GWAS	UKB	413904	rs8030025	EIF2AK4
Goodman et al., 2024	38352337	Sleep (SHS-PC3)	GWAS	UKB	413904	18:59688193_CA_C	RPIAP1/PIGN
Goodman et al., 2024	38352337	Sleep (SHS-PC3)	GWAS	UKB	413904	rs61773390	PER3/RP3-467L1.4
Goodman et al., 2024	38352337	Sleep (SHS-PC3)	GWAS	UKB	413904	rs17448682	DDI2
Goodman et al., 2024	38352337	Sleep (SHS-PC3)	GWAS	UKB	413904	rs4912144	TMCO4
Goodman et al., 2024	38352337	Sleep (SHS-PC3)	GWAS	UKB	413904	1:21227005_TA_T	EIF4G3
Goodman et al., 2024	38352337	Sleep (SHS-PC3)	GWAS	UKB	413904	rs12140153	INADL
Goodman et al., 2024	38352337	Sleep (SHS-PC3)	GWAS	UKB	413904	rs7547493	AK5
Goodman et al., 2024	38352337	Sleep (SHS-PC3)	GWAS	UKB	413904	rs528116116	RP4-726F1.1/ADH5P2
Goodman et al., 2024	38352337	Sleep (SHS-PC3)	GWAS	UKB	413904	rs72720396	BARHL2/RP4-665J23.1
Goodman et al., 2024	38352337	Sleep (SHS-PC3)	GWAS	UKB	413904	rs59956124	AC093577.1/RNU6-210P
Goodman et al., 2024	38352337	Sleep (SHS-PC3)	GWAS	UKB	413904	rs11165654	EEF1A1P11/RN7SL831P
Goodman et al., 2024	38352337	Sleep (SHS-PC3)	GWAS	UKB	413904	rs796131812	SYPL2
Goodman et al., 2024	38352337	Sleep (SHS-PC3)	GWAS	UKB	413904	1:150459376_GC_G	RPRD2/TARS2
Goodman et al., 2024	38352337	Sleep (SHS-PC3)	GWAS	UKB	413904	rs116141661	RABGAP1L
Goodman et al., 2024	38352337	Sleep (SHS-PC3)	GWAS	UKB	413904	rs975025	AXDND1
Goodman et al., 2024	38352337	Sleep (SHS-PC3)	GWAS	UKB	413904	rs1144566	RGS16
Goodman et al., 2024	38352337	Sleep (SHS-PC3)	GWAS	UKB	413904	rs13011556	NPM1P48/AC022311.1
Goodman et al., 2024	38352337	Sleep (SHS-PC3)	GWAS	UKB	413904	2:12823325_AAAG_A	AC096559.2/RP11-333O1.1
Goodman et al., 2024	38352337	Sleep (SHS-PC3)	GWAS	UKB	413904	rs2712056	KLHL29/ATAD2B
Goodman et al., 2024	38352337	Sleep (SHS-PC3)	GWAS	UKB	413904	rs6543657	BIRC6
Goodman et al., 2024	38352337	Sleep (SHS-PC3)	GWAS	UKB	413904	rs848552	CRIM1
Goodman et al., 2024	38352337	Sleep (SHS-PC3)	GWAS	UKB	413904	rs13403127	CAMKMT
Goodman et al., 2024	38352337	Sleep (SHS-PC3)	GWAS	UKB	413904	rs12713014	STON1-GTF2A1L
Goodman et al., 2024	38352337	Sleep (SHS-PC3)	GWAS	UKB	413904	2:50456754_ACTT_A	NRXN1
Goodman et al., 2024	38352337	Sleep (SHS-PC3)	GWAS	UKB	413904	rs4672458	AC069157.1/GPR75-ASB3
Goodman et al., 2024	38352337	Sleep (SHS-PC3)	GWAS	UKB	413904	rs35400273	XPO1
Goodman et al., 2024	38352337	Sleep (SHS-PC3)	GWAS	UKB	413904	rs113851554	MEIS1
Goodman et al., 2024	38352337	Sleep (SHS-PC3)	GWAS	UKB	413904	rs10520176	AC079117.1/LRRTM4
Goodman et al., 2024	38352337	Sleep (SHS-PC3)	GWAS	UKB	413904	rs12464382	AC084149.1/AC105399.2
Goodman et al., 2024	38352337	Sleep (SHS-PC3)	GWAS	UKB	413904	rs62172064	AC096558.1/RP11-570L15.2/ARHGAP15
Goodman et al., 2024	38352337	Sleep (SHS-PC3)	GWAS	UKB	413904	rs1947198	AC017080.1/EPC2
Goodman et al., 2024	38352337	Sleep (SHS-PC3)	GWAS	UKB	413904	2:198915255_TA_T	PLCL1
Goodman et al., 2024	38352337	Sleep (SHS-PC3)	GWAS	UKB	413904	rs183235241	INO80D
Goodman et al., 2024	38352337	Sleep (SHS-PC3)	GWAS	UKB	413904	rs57435966	TRAF3IP1/RNU6-234P
Goodman et al., 2024	38352337	Sleep (SHS-PC3)	GWAS	UKB	413904	rs62182135	HDAC4
Goodman et al., 2024	38352337	Sleep (SHS-PC3)	GWAS	UKB	413904	rs149611468	CAV3/RAD18
Goodman et al., 2024	38352337	Sleep (SHS-PC3)	GWAS	UKB	413904	rs6442446	RP11-536I6.1/RNA5SP124
Goodman et al., 2024	38352337	Sleep (SHS-PC3)	GWAS	UKB	413904	3:18243276_CT_C	TBC1D5
Goodman et al., 2024	38352337	Sleep (SHS-PC3)	GWAS	UKB	413904	rs13059636	AC133680.1
Goodman et al., 2024	38352337	Sleep (SHS-PC3)	GWAS	UKB	413904	rs148259784	SEMA3F
Goodman et al., 2024	38352337	Sleep (SHS-PC3)	GWAS	UKB	413904	rs60194061	ROBO2
Goodman et al., 2024	38352337	Sleep (SHS-PC3)	GWAS	UKB	413904	rs9831488	PPM1L
Goodman et al., 2024	38352337	Sleep (SHS-PC3)	GWAS	UKB	413904	rs3850174	NCEH1
Goodman et al., 2024	38352337	Sleep (SHS-PC3)	GWAS	UKB	413904	3:182275036_CTT_C	RP11-139K4.2/RPL7L1P8
Goodman et al., 2024	38352337	Sleep (SHS-PC3)	GWAS	UKB	413904	rs2239626	DGKG
Goodman et al., 2024	38352337	Sleep (SHS-PC3)	GWAS	UKB	413904	rs231398	SH3BP2
Goodman et al., 2024	38352337	Sleep (SHS-PC3)	GWAS	UKB	413904	rs200918018	BIN2P1/RP11-127B20.2
Goodman et al., 2024	38352337	Sleep (SHS-PC3)	GWAS	UKB	413904	rs1296328	RP11-775H9.2
Goodman et al., 2024	38352337	Sleep (SHS-PC3)	GWAS	UKB	413904	rs10058356	PRLR
Goodman et al., 2024	38352337	Sleep (SHS-PC3)	GWAS	UKB	413904	rs5869396	RASA1
Goodman et al., 2024	38352337	Sleep (SHS-PC3)	GWAS	UKB	413904	5:87700985_GA_G	TMEM161B-AS1
Goodman et al., 2024	38352337	Sleep (SHS-PC3)	GWAS	UKB	413904	rs1976423	RP11-6N13.1
Goodman et al., 2024	38352337	Sleep (SHS-PC3)	GWAS	UKB	413904	rs4246036	AC091969.1
Goodman et al., 2024	38352337	Sleep (SHS-PC3)	GWAS	UKB	413904	rs7735794	RP11-91H12.4
Goodman et al., 2024	38352337	Sleep (SHS-PC3)	GWAS	UKB	413904	5:176878781_AG_A	PRR7
Goodman et al., 2024	38352337	Sleep (SHS-PC3)	GWAS	UKB	413904	rs9395520	PHACTR1
Goodman et al., 2024	38352337	Sleep (SHS-PC3)	GWAS	UKB	413904	rs1983891	FOXP4
Goodman et al., 2024	38352337	Sleep (SHS-PC3)	GWAS	UKB	413904	rs62405420	TFAP2B
Goodman et al., 2024	38352337	Sleep (SHS-PC3)	GWAS	UKB	413904	rs76899638	HCRTR2/GFRAL
Goodman et al., 2024	38352337	Sleep (SHS-PC3)	GWAS	UKB	413904	rs71552589	KHDRBS2
Goodman et al., 2024	38352337	Sleep (SHS-PC3)	GWAS	UKB	413904	rs852960	RP1-288M22.2/AL035467.1
Goodman et al., 2024	38352337	Sleep (SHS-PC3)	GWAS	UKB	413904	rs60616179	RP1-249I4.2/GPR6
Goodman et al., 2024	38352337	Sleep (SHS-PC3)	GWAS	UKB	413904	rs12206116	PHACTR2
Goodman et al., 2024	38352337	Sleep (SHS-PC3)	GWAS	UKB	413904	rs2050185	SAMD5
Goodman et al., 2024	38352337	Sleep (SHS-PC3)	GWAS	UKB	413904	rs112457916	RP1-200K18.1
Goodman et al., 2024	38352337	Sleep (SHS-PC3)	GWAS	UKB	413904	rs12525312	RP11-347L18.1/RP11-300M24.1
Goodman et al., 2024	38352337	Sleep (SHS-PC3)	GWAS	UKB	413904	rs9348050	PDE10A
Goodman et al., 2024	38352337	Sleep (SHS-PC3)	GWAS	UKB	413904	rs10267141	AC009508.1/RNA5SP228
Goodman et al., 2024	38352337	Sleep (SHS-PC3)	GWAS	UKB	413904	rs17161045	PDE1C
Goodman et al., 2024	38352337	Sleep (SHS-PC3)	GWAS	UKB	413904	rs4245555	GRB10
Goodman et al., 2024	38352337	Sleep (SHS-PC3)	GWAS	UKB	413904	rs2968511	CALN1
Goodman et al., 2024	38352337	Sleep (SHS-PC3)	GWAS	UKB	413904	rs796729830	SHFM1/MARK2P10
Goodman et al., 2024	38352337	Sleep (SHS-PC3)	GWAS	UKB	413904	rs4729854	RASA4DP/FAM185A
Goodman et al., 2024	38352337	Sleep (SHS-PC3)	GWAS	UKB	413904	rs62479736	CSMD1
Goodman et al., 2024	38352337	Sleep (SHS-PC3)	GWAS	UKB	413904	rs35524253	CSMD1
Goodman et al., 2024	38352337	Sleep (SHS-PC3)	GWAS	UKB	413904	rs2945870	SGK223/CTA-398F10.1
Goodman et al., 2024	38352337	Sleep (SHS-PC3)	GWAS	UKB	413904	rs34566719	NRG1
Goodman et al., 2024	38352337	Sleep (SHS-PC3)	GWAS	UKB	413904	8:33590947_CCCTT_C	RP11-317N12.1
Goodman et al., 2024	38352337	Sleep (SHS-PC3)	GWAS	UKB	413904	rs7009244	HNF4G/AC016194.1
Goodman et al., 2024	38352337	Sleep (SHS-PC3)	GWAS	UKB	413904	rs1470764	YWHAZ
Goodman et al., 2024	38352337	Sleep (SHS-PC3)	GWAS	UKB	413904	rs17716502	TRPS1
Goodman et al., 2024	38352337	Sleep (SHS-PC3)	GWAS	UKB	413904	rs140190288	PTPRD
Goodman et al., 2024	38352337	Sleep (SHS-PC3)	GWAS	UKB	413904	rs2291589	RP11-220I1.5
Goodman et al., 2024	38352337	Sleep (SHS-PC3)	GWAS	UKB	413904	rs62553781	RP11-401G5.1/RP11-171A24.2
Goodman et al., 2024	38352337	Sleep (SHS-PC3)	GWAS	UKB	413904	rs10818834	DENND1A
Goodman et al., 2024	38352337	Sleep (SHS-PC3)	GWAS	UKB	413904	rs10988239	RP11-247A12.2
Goodman et al., 2024	38352337	Sleep (SHS-PC3)	GWAS	UKB	413904	9:139320900_GT_G	PMPCA/INPP5E
Goodman et al., 2024	38352337	Sleep (SHS-PC3)	GWAS	UKB	413904	9:140257189_C_T	EXD3
Goodman et al., 2024	38352337	Sleep (SHS-PC3)	GWAS	UKB	413904	rs3740451	BICC1
Goodman et al., 2024	38352337	Sleep (SHS-PC3)	GWAS	UKB	413904	rs55646633	PDZD8
Goodman et al., 2024	38352337	Sleep (SHS-PC3)	GWAS	UKB	413904	rs3808964	GPR26
Goodman et al., 2024	38352337	Sleep (SHS-PC3)	GWAS	UKB	413904	rs72632980	SOX6/C11orf58
Goodman et al., 2024	38352337	Sleep (SHS-PC3)	GWAS	UKB	413904	rs640245	RP4-710M3.1/MPPED2
Goodman et al., 2024	38352337	Sleep (SHS-PC3)	GWAS	UKB	413904	rs11032362	CD59/FBXO3
Goodman et al., 2024	38352337	Sleep (SHS-PC3)	GWAS	UKB	413904	rs7928842	CELF1
Goodman et al., 2024	38352337	Sleep (SHS-PC3)	GWAS	UKB	413904	rs6591444	OR5BD1P/CYCSP26
Goodman et al., 2024	38352337	Sleep (SHS-PC3)	GWAS	UKB	413904	11:58363045_CT_C	ZFP91/ZFP91-CNTF
Goodman et al., 2024	38352337	Sleep (SHS-PC3)	GWAS	UKB	413904	rs1949885	RNU6-544P/ARL6IP1P3
Goodman et al., 2024	38352337	Sleep (SHS-PC3)	GWAS	UKB	413904	rs113887439	MTNR1B
Goodman et al., 2024	38352337	Sleep (SHS-PC3)	GWAS	UKB	413904	rs1630468	ZBTB16
Goodman et al., 2024	38352337	Sleep (SHS-PC3)	GWAS	UKB	413904	rs577924	RP11-820L6.1
Goodman et al., 2024	38352337	Sleep (SHS-PC3)	GWAS	UKB	413904	rs74357745	C11orf63
Goodman et al., 2024	38352337	Sleep (SHS-PC3)	GWAS	UKB	413904	rs10772978	RP11-239A17.1/RP11-1018J11.1
Goodman et al., 2024	38352337	Sleep (SHS-PC3)	GWAS	UKB	413904	rs12811046	SOX5
Goodman et al., 2024	38352337	Sleep (SHS-PC3)	GWAS	UKB	413904	rs13377754	RP13-359K18.1/RNU6-472P
Goodman et al., 2024	38352337	Sleep (SHS-PC3)	GWAS	UKB	413904	rs12427164	AC087897.1/RP11-804F13.2
Goodman et al., 2024	38352337	Sleep (SHS-PC3)	GWAS	UKB	413904	rs11183201	ARID2
Goodman et al., 2024	38352337	Sleep (SHS-PC3)	GWAS	UKB	413904	12:49328801_CAA_C	RP11-302B13.5/AC073610.5
Goodman et al., 2024	38352337	Sleep (SHS-PC3)	GWAS	UKB	413904	rs7299922	RP11-968A15.8/COPZ1
Goodman et al., 2024	38352337	Sleep (SHS-PC3)	GWAS	UKB	413904	rs11174782	RSL24D1P5/AVPR1A
Goodman et al., 2024	38352337	Sleep (SHS-PC3)	GWAS	UKB	413904	rs7959983	RP11-654D12.2/RP11-567C2.1
Goodman et al., 2024	38352337	Sleep (SHS-PC3)	GWAS	UKB	413904	rs7304278	RP11-144F15.1/RFX4
Goodman et al., 2024	38352337	Sleep (SHS-PC3)	GWAS	UKB	413904	13:56274766_AT_A	MIR5007/HNF4GP1
Goodman et al., 2024	38352337	Sleep (SHS-PC3)	GWAS	UKB	413904	rs2593487	LINC00401/SRSF1P1
Goodman et al., 2024	38352337	Sleep (SHS-PC3)	GWAS	UKB	413904	13:77597260_TTCATTCATTCATTCCGTTCAC_T	FBXL3
Goodman et al., 2024	38352337	Sleep (SHS-PC3)	GWAS	UKB	413904	13:94116249_TCA_T	GPC6
Goodman et al., 2024	38352337	Sleep (SHS-PC3)	GWAS	UKB	413904	rs12431576	OTX2-AS1/RP11-1085N6.5
Goodman et al., 2024	38352337	Sleep (SHS-PC3)	GWAS	UKB	413904	rs775809675	RP11-61O1.1
Goodman et al., 2024	38352337	Sleep (SHS-PC3)	GWAS	UKB	413904	rs59986227	SEMA6D
Goodman et al., 2024	38352337	Sleep (SHS-PC3)	GWAS	UKB	413904	rs11642481	RBBP6/CTD-2540M10.1
Goodman et al., 2024	38352337	Sleep (SHS-PC3)	GWAS	UKB	413904	rs12927162	CASC16
Goodman et al., 2024	38352337	Sleep (SHS-PC3)	GWAS	UKB	413904	rs1421085	FTO
Goodman et al., 2024	38352337	Sleep (SHS-PC3)	GWAS	UKB	413904	rs2398144	GNAO1
Goodman et al., 2024	38352337	Sleep (SHS-PC3)	GWAS	UKB	413904	rs8063159	RP11-354I13.1/GNPATP
Goodman et al., 2024	38352337	Sleep (SHS-PC3)	GWAS	UKB	413904	rs112439757	PMFBP1
Goodman et al., 2024	38352337	Sleep (SHS-PC3)	GWAS	UKB	413904	rs2518022	PER1/RP11-599B13.6
Goodman et al., 2024	38352337	Sleep (SHS-PC3)	GWAS	UKB	413904	rs3760185	RASD1/PEMT
Goodman et al., 2024	38352337	Sleep (SHS-PC3)	GWAS	UKB	413904	rs113790186	AP2B1
Goodman et al., 2024	38352337	Sleep (SHS-PC3)	GWAS	UKB	413904	rs398030969	SNX11/SKAP1
Goodman et al., 2024	38352337	Sleep (SHS-PC3)	GWAS	UKB	413904	rs488223	CALCOCO2
Goodman et al., 2024	38352337	Sleep (SHS-PC3)	GWAS	UKB	413904	rs56402915	CA10
Goodman et al., 2024	38352337	Sleep (SHS-PC3)	GWAS	UKB	413904	rs72829713	AC011073.1/ANKFN1
Goodman et al., 2024	38352337	Sleep (SHS-PC3)	GWAS	UKB	413904	rs72841385	TANC2
Goodman et al., 2024	38352337	Sleep (SHS-PC3)	GWAS	UKB	413904	rs2949919	PITPNC1
Goodman et al., 2024	38352337	Sleep (SHS-PC3)	GWAS	UKB	413904	rs11659500	C18orf42
Goodman et al., 2024	38352337	Sleep (SHS-PC3)	GWAS	UKB	413904	rs11083105	WBP2P1/RP11-958F21.3
Goodman et al., 2024	38352337	Sleep (SHS-PC3)	GWAS	UKB	413904	rs138547299	NOL4
Goodman et al., 2024	38352337	Sleep (SHS-PC3)	GWAS	UKB	413904	rs12969848	RNU7-145P/RP11-142I20.1
Goodman et al., 2024	38352337	Sleep (SHS-PC3)	GWAS	UKB	413904	rs9962650	RP11-214L13.1/CTD-2008L17.1
Goodman et al., 2024	38352337	Sleep (SHS-PC3)	GWAS	UKB	413904	rs9964420	SEC11C
Goodman et al., 2024	38352337	Sleep (SHS-PC3)	GWAS	UKB	413904	rs11152350	ZCCHC2
Goodman et al., 2024	38352337	Sleep (SHS-PC3)	GWAS	UKB	413904	rs10402849	GNG7
Goodman et al., 2024	38352337	Sleep (SHS-PC3)	GWAS	UKB	413904	rs141700858	DUS3L/AC011499.1
Goodman et al., 2024	38352337	Sleep (SHS-PC3)	GWAS	UKB	413904	rs9636202	RN7SL513P/PGPEP1
Goodman et al., 2024	38352337	Sleep (SHS-PC3)	GWAS	UKB	413904	rs58876439	POU2F2
Goodman et al., 2024	38352337	Sleep (SHS-PC3)	GWAS	UKB	413904	19:46988685_AAATAAT_A	PPP5D1
Goodman et al., 2024	38352337	Sleep (SHS-PC3)	GWAS	UKB	413904	rs2144898	PPIAP17/KIF16B
Goodman et al., 2024	38352337	Sleep (SHS-PC3)	GWAS	UKB	413904	rs6131942	PCSK2
Goodman et al., 2024	38352337	Sleep (SHS-PC3)	GWAS	UKB	413904	rs2072727	PABPC1L
Goodman et al., 2024	38352337	Sleep (SHS-PC3)	GWAS	UKB	413904	rs117143374	PSMG1
Goodman et al., 2024	38352337	Sleep (SHS-PC3)	GWAS	UKB	413904	rs139911	TNRC6B
Goodman et al., 2024	38352337	Sleep (SHS-PC3)	GWAS	UKB	413904	rs6007580	UPK3A/FAM118A
Goodman et al., 2024	38352337	Sleep (SHS-PC4)	GWAS	UKB	413904	13:58551593_	13:58551593
Goodman et al., 2024	38352337	Sleep (SHS-PC4)	GWAS	UKB	413904	rs73959083	ONECUT2/FECH
Goodman et al., 2024	38352337	Sleep (SHS-PC4)	GWAS	UKB	413904	rs12128472	RP5-898J17.1
Goodman et al., 2024	38352337	Sleep (SHS-PC4)	GWAS	UKB	413904	rs680767	MYBPHL
Goodman et al., 2024	38352337	Sleep (SHS-PC4)	GWAS	UKB	413904	rs11688767	CTD-2026C7.1
Goodman et al., 2024	38352337	Sleep (SHS-PC4)	GWAS	UKB	413904	rs13409790	AC104777.4
Goodman et al., 2024	38352337	Sleep (SHS-PC4)	GWAS	UKB	413904	rs113707721	AC073551.1/NR4A2
Goodman et al., 2024	38352337	Sleep (SHS-PC4)	GWAS	UKB	413904	rs11473353	ERBB4/AC079610.1
Goodman et al., 2024	38352337	Sleep (SHS-PC4)	GWAS	UKB	413904	rs73082341	RP13-131K19.2
Goodman et al., 2024	38352337	Sleep (SHS-PC4)	GWAS	UKB	413904	rs73080990	SEMA3F
Goodman et al., 2024	38352337	Sleep (SHS-PC4)	GWAS	UKB	413904	rs75036237	RP11-78E6.1/RP11-71G7.1
Goodman et al., 2024	38352337	Sleep (SHS-PC4)	GWAS	UKB	413904	rs775727687	CTD-2029E14.1/LINC01019
Goodman et al., 2024	38352337	Sleep (SHS-PC4)	GWAS	UKB	413904	rs258494	POC5/SLC25A5P9
Goodman et al., 2024	38352337	Sleep (SHS-PC4)	GWAS	UKB	413904	rs7731574	SIL1
Goodman et al., 2024	38352337	Sleep (SHS-PC4)	GWAS	UKB	413904	6:155048793_CT_C	RP11-15G8.1/SCAF8
Goodman et al., 2024	38352337	Sleep (SHS-PC4)	GWAS	UKB	413904	rs12554512	AL391117.1/SUMO2P2
Goodman et al., 2024	38352337	Sleep (SHS-PC4)	GWAS	UKB	413904	rs10878269	MSRB3
Goodman et al., 2024	38352337	Sleep (SHS-PC4)	GWAS	UKB	413904	rs7295391	RP11-554D14.1/WSCD2
Goodman et al., 2024	38352337	Sleep (SHS-PC4)	GWAS	UKB	413904	rs1846644	KSR2
Goodman et al., 2024	38352337	Sleep (SHS-PC4)	GWAS	UKB	413904	rs592333	DLEU7
Goodman et al., 2024	38352337	Sleep (SHS-PC4)	GWAS	UKB	413904	rs60270996	RN7SL618P/AL450423.1
Goodman et al., 2024	38352337	Sleep (SHS-PC4)	GWAS	UKB	413904	rs1540840	BCL11B
Goodman et al., 2024	38352337	Sleep (SHS-PC4)	GWAS	UKB	413904	rs796856741	FTO
Goodman et al., 2024	38352337	Sleep (SHS-PC4)	GWAS	UKB	413904	rs8069947	SMG6
Goodman et al., 2024	38352337	Sleep (SHS-PC4)	GWAS	UKB	413904	rs6587147	KCNJ12
Goodman et al., 2024	38352337	Sleep (SHS-PC4)	GWAS	UKB	413904	rs1706722	RP11-707O23.5/RPS26P8
Goodman et al., 2024	38352337	Sleep (SHS-PC5)	GWAS	UKB	413904	rs138572890	16:50264953
Goodman et al., 2024	38352337	Sleep (SHS-PC5)	GWAS	UKB	413904	19:59007970_	19:59007970
Goodman et al., 2024	38352337	Sleep (SHS-PC5)	GWAS	UKB	413904	16:1255040_GC_G	CACNA1H
Goodman et al., 2024	38352337	Sleep (SHS-PC5)	GWAS	UKB	413904	rs66863998	CHRNE/GP1BA
Goodman et al., 2024	38352337	Sleep (SHS-PC5)	GWAS	UKB	413904	rs11682175	CTD-2026C7.1
Goodman et al., 2024	38352337	Sleep (SHS-PC5)	GWAS	UKB	413904	rs113851554	MEIS1
Goodman et al., 2024	38352337	Sleep (SHS-PC5)	GWAS	UKB	413904	rs1823125	PAX8/IGKV1OR2-108
Goodman et al., 2024	38352337	Sleep (SHS-PC5)	GWAS	UKB	413904	rs5026242	STAG1
Goodman et al., 2024	38352337	Sleep (SHS-PC5)	GWAS	UKB	413904	rs139708773	ST8SIA4/RN7SL802P
Goodman et al., 2024	38352337	Sleep (SHS-PC5)	GWAS	UKB	413904	rs4713075	RP11-209A2.1/PRSS16
Goodman et al., 2024	38352337	Sleep (SHS-PC5)	GWAS	UKB	413904	rs17185536	PRDX2P4/RP3-344J20.1
Goodman et al., 2024	38352337	Sleep (SHS-PC5)	GWAS	UKB	413904	rs11783091	MSRA
Goodman et al., 2024	38352337	Sleep (SHS-PC5)	GWAS	UKB	413904	rs1814140	SGCZ
Goodman et al., 2024	38352337	Sleep (SHS-PC5)	GWAS	UKB	413904	rs10973207	RP11-220I1.1/RP11-220I1.2
Goodman et al., 2024	38352337	Sleep (SHS-PC5)	GWAS	UKB	413904	rs527746492	BTRC
Goodman et al., 2024	38352337	Sleep (SHS-PC5)	GWAS	UKB	413904	rs2297787	CNNM2
Goodman et al., 2024	38352337	Sleep (SHS-PC5)	GWAS	UKB	413904	rs4587762	DRD2
Goodman et al., 2024	38352337	Sleep (SHS-PC5)	GWAS	UKB	413904	11:122827905_ATTAAC_A	C11orf63
Goodman et al., 2024	38352337	Sleep (SHS-PC5)	GWAS	UKB	413904	rs7332332	AL450423.1/LINC00558
Goodman et al., 2024	38352337	Sleep (SHS-PC5)	GWAS	UKB	413904	rs61988066	NOVA1/NOVA1-AS1
Goodman et al., 2024	38352337	Sleep (SHS-PC5)	GWAS	UKB	413904	rs11631200	MAP2K5
Goodman et al., 2024	38352337	Sleep (SHS-PC5)	GWAS	UKB	413904	rs9901941	RP13-890H12.2/CTD-2020K17.1
Goodman et al., 2024	38352337	Sleep (SHS-PC5)	GWAS	UKB	413904	rs149190423	OLFM2
Goodman et al., 2024	38352337	Sleep (SHS-PC5)	GWAS	UKB	413904	rs429358	APOE
Friligkou et al., 2024	38405718	Anxiety	GWAS	AoU, FinnGen, iPSYCH, MVP, PGC, UKB - (EUR only)	1096458	rs10078721	/
Friligkou et al., 2024	38405718	Anxiety	GWAS	AoU, FinnGen, iPSYCH, MVP, PGC, UKB - (EUR only)	1096458	rs10138360	YLPM1
Friligkou et al., 2024	38405718	Anxiety	GWAS	AoU, FinnGen, iPSYCH, MVP, PGC, UKB - (EUR only)	1096458	rs10171148	AC068490.2
Friligkou et al., 2024	38405718	Anxiety	GWAS	AoU, FinnGen, iPSYCH, MVP, PGC, UKB - (EUR only)	1096458	rs11128896	AC144521.1
Friligkou et al., 2024	38405718	Anxiety	GWAS	AoU, FinnGen, iPSYCH, MVP, PGC, UKB - (EUR only)	1096458	rs11629241	/
Friligkou et al., 2024	38405718	Anxiety	GWAS	AoU, FinnGen, iPSYCH, MVP, PGC, UKB - (EUR only)	1096458	rs11867537	BPTF
Friligkou et al., 2024	38405718	Anxiety	GWAS	AoU, FinnGen, iPSYCH, MVP, PGC, UKB - (EUR only)	1096458	rs12457101	RAB27B
Friligkou et al., 2024	38405718	Anxiety	GWAS	AoU, FinnGen, iPSYCH, MVP, PGC, UKB - (EUR only)	1096458	rs12607755	CELF4
Friligkou et al., 2024	38405718	Anxiety	GWAS	AoU, FinnGen, iPSYCH, MVP, PGC, UKB - (EUR only)	1096458	rs13064780	CCDC36
Friligkou et al., 2024	38405718	Anxiety	GWAS	AoU, FinnGen, iPSYCH, MVP, PGC, UKB - (EUR only)	1096458	rs13409451	ARHGAP15
Friligkou et al., 2024	38405718	Anxiety	GWAS	AoU, FinnGen, iPSYCH, MVP, PGC, UKB - (EUR only)	1096458	rs13409451	RP11-570L15.2
Friligkou et al., 2024	38405718	Anxiety	GWAS	AoU, FinnGen, iPSYCH, MVP, PGC, UKB - (EUR only)	1096458	rs1565418	SORCS3
Friligkou et al., 2024	38405718	Anxiety	GWAS	AoU, FinnGen, iPSYCH, MVP, PGC, UKB - (EUR only)	1096458	rs16839724	AC007879.5
Friligkou et al., 2024	38405718	Anxiety	GWAS	AoU, FinnGen, iPSYCH, MVP, PGC, UKB - (EUR only)	1096458	rs17408393	DCC
Friligkou et al., 2024	38405718	Anxiety	GWAS	AoU, FinnGen, iPSYCH, MVP, PGC, UKB - (EUR only)	1096458	rs2271961	TRAIP
Friligkou et al., 2024	38405718	Anxiety	GWAS	AoU, FinnGen, iPSYCH, MVP, PGC, UKB - (EUR only)	1096458	rs2284351	ITIH1
Friligkou et al., 2024	38405718	Anxiety	GWAS	AoU, FinnGen, iPSYCH, MVP, PGC, UKB - (EUR only)	1096458	rs2298527	NCAM1
Friligkou et al., 2024	38405718	Anxiety	GWAS	AoU, FinnGen, iPSYCH, MVP, PGC, UKB - (EUR only)	1096458	rs2425752	NCOA5
Friligkou et al., 2024	38405718	Anxiety	GWAS	AoU, FinnGen, iPSYCH, MVP, PGC, UKB - (EUR only)	1096458	rs2734849	ANKK1
Friligkou et al., 2024	38405718	Anxiety	GWAS	AoU, FinnGen, iPSYCH, MVP, PGC, UKB - (EUR only)	1096458	rs28381344	CLIC1
Friligkou et al., 2024	38405718	Anxiety	GWAS	AoU, FinnGen, iPSYCH, MVP, PGC, UKB - (EUR only)	1096458	rs35704262	RABEPK
Friligkou et al., 2024	38405718	Anxiety	GWAS	AoU, FinnGen, iPSYCH, MVP, PGC, UKB - (EUR only)	1096458	rs36092177	ZSCAN12
Friligkou et al., 2024	38405718	Anxiety	GWAS	AoU, FinnGen, iPSYCH, MVP, PGC, UKB - (EUR only)	1096458	rs3889573	MAD1L1
Friligkou et al., 2024	38405718	Anxiety	GWAS	AoU, FinnGen, iPSYCH, MVP, PGC, UKB - (EUR only)	1096458	rs3889573	AC110781.3
Friligkou et al., 2024	38405718	Anxiety	GWAS	AoU, FinnGen, iPSYCH, MVP, PGC, UKB - (EUR only)	1096458	rs4476748	/
Friligkou et al., 2024	38405718	Anxiety	GWAS	AoU, FinnGen, iPSYCH, MVP, PGC, UKB - (EUR only)	1096458	rs4582964	/
Friligkou et al., 2024	38405718	Anxiety	GWAS	AoU, FinnGen, iPSYCH, MVP, PGC, UKB - (EUR only)	1096458	rs4702	FURIN
Friligkou et al., 2024	38405718	Anxiety	GWAS	AoU, FinnGen, iPSYCH, MVP, PGC, UKB - (EUR only)	1096458	rs4772087	STK24
Friligkou et al., 2024	38405718	Anxiety	GWAS	AoU, FinnGen, iPSYCH, MVP, PGC, UKB - (EUR only)	1096458	rs4870060	ESR1
Friligkou et al., 2024	38405718	Anxiety	GWAS	AoU, FinnGen, iPSYCH, MVP, PGC, UKB - (EUR only)	1096458	rs55893771	MAD1L1
Friligkou et al., 2024	38405718	Anxiety	GWAS	AoU, FinnGen, iPSYCH, MVP, PGC, UKB - (EUR only)	1096458	rs56294784	STK24
Friligkou et al., 2024	38405718	Anxiety	GWAS	AoU, FinnGen, iPSYCH, MVP, PGC, UKB - (EUR only)	1096458	rs56321769	LRFN5
Friligkou et al., 2024	38405718	Anxiety	GWAS	AoU, FinnGen, iPSYCH, MVP, PGC, UKB - (EUR only)	1096458	rs6689226	RP4-598G3.1
Friligkou et al., 2024	38405718	Anxiety	GWAS	AoU, FinnGen, iPSYCH, MVP, PGC, UKB - (EUR only)	1096458	rs6760444	AC007879.5
Friligkou et al., 2024	38405718	Anxiety	GWAS	AoU, FinnGen, iPSYCH, MVP, PGC, UKB - (EUR only)	1096458	rs7129727	TMX2
Friligkou et al., 2024	38405718	Anxiety	GWAS	AoU, FinnGen, iPSYCH, MVP, PGC, UKB - (EUR only)	1096458	rs7129727	TMX2-CTNND1
Friligkou et al., 2024	38405718	Anxiety	GWAS	AoU, FinnGen, iPSYCH, MVP, PGC, UKB - (EUR only)	1096458	rs7187913	ZFHX3
Friligkou et al., 2024	38405718	Anxiety	GWAS	AoU, FinnGen, iPSYCH, MVP, PGC, UKB - (EUR only)	1096458	rs75059851	IGSF9B
Friligkou et al., 2024	38405718	Anxiety	GWAS	AoU, FinnGen, iPSYCH, MVP, PGC, UKB - (EUR only)	1096458	rs7552924	PDE4B
Friligkou et al., 2024	38405718	Anxiety	GWAS	AoU, FinnGen, iPSYCH, MVP, PGC, UKB - (EUR only)	1096458	rs7625233	PLCL2
Friligkou et al., 2024	38405718	Anxiety	GWAS	AoU, FinnGen, iPSYCH, MVP, PGC, UKB - (EUR only)	1096458	rs77363699	CCDC178
Friligkou et al., 2024	38405718	Anxiety	GWAS	AoU, FinnGen, iPSYCH, MVP, PGC, UKB - (EUR only)	1096458	rs7928017	/
Friligkou et al., 2024	38405718	Anxiety	GWAS	AoU, FinnGen, iPSYCH, MVP, PGC, UKB - (EUR only)	1096458	rs8180817	FOXP2
Docherty et al., 2023	37777856	Suicide attempt	Meta-analysis of GWAS	UKB, PGC, iPSYCH, MVP, other (EUR)	518612	rs12798900;rs17601612	DRD2
Docherty et al., 2023	37777856	Suicide attempt	Meta-analysis of GWAS	UKB, PGC, iPSYCH, MVP, other (EUR)	518612	rs12798900	RP11-159N11.3
Docherty et al., 2023	37777856	Suicide attempt	Meta-analysis of GWAS	UKB, PGC, iPSYCH, MVP, other (EUR)	518612	rs6224	FURIN
Docherty et al., 2023	37777856	Suicide attempt	Meta-analysis of GWAS	UKB, PGC, iPSYCH, MVP, other (EUR)	518612	rs6224	FES
Docherty et al., 2023	37777856	Suicide attempt	Meta-analysis of GWAS	UKB, PGC, iPSYCH, MVP, other (EUR)	518612	rs850261	OTX2-AS1
Docherty et al., 2023	37777856	Suicide attempt	Meta-analysis of GWAS	UKB, PGC, iPSYCH, MVP, other (EUR)	518612	rs850261	RP11-1085N6.5
Docherty et al., 2023	37777856	Suicide attempt	Meta-analysis of GWAS	UKB, PGC, iPSYCH, MVP, other (EUR)	518612	rs2284000	CACNG2
Docherty et al., 2023	37777856	Suicide attempt	Meta-analysis of GWAS	UKB, PGC, iPSYCH, MVP, other (EUR)	518612	rs12798900;rs17601612	MIR4301
Docherty et al., 2023	37777856	Suicide attempt	Meta-analysis of GWAS	UKB, PGC, iPSYCH, MVP, other (EUR)	518612	rs35869525	LINC00240
Docherty et al., 2023	37777856	Suicide attempt	Meta-analysis of GWAS	UKB, PGC, iPSYCH, MVP, other (EUR)	518612	rs35869525	U91328.19
Docherty et al., 2023	37777856	Suicide attempt	Meta-analysis of GWAS	UKB, PGC, iPSYCH, MVP, other (EUR)	518612	rs35869525	HIST1H4C
Docherty et al., 2023	37777856	Suicide attempt	Meta-analysis of GWAS	UKB, PGC, iPSYCH, MVP, other (EUR)	518612	rs35869525	BTN3A2
Docherty et al., 2023	37777856	Suicide attempt	Meta-analysis of GWAS	UKB, PGC, iPSYCH, MVP, other (EUR)	518612	rs35869525	BTN2A2
Docherty et al., 2023	37777856	Suicide attempt	Meta-analysis of GWAS	UKB, PGC, iPSYCH, MVP, other (EUR)	518612	rs35869525	BTN3A3
Docherty et al., 2023	37777856	Suicide attempt	Meta-analysis of GWAS	UKB, PGC, iPSYCH, MVP, other (EUR)	518612	rs35869525	PRSS16
Docherty et al., 2023	37777856	Suicide attempt	Meta-analysis of GWAS	UKB, PGC, iPSYCH, MVP, other (EUR)	518612	rs35869525	ZNF391
Docherty et al., 2023	37777856	Suicide attempt	Meta-analysis of GWAS	UKB, PGC, iPSYCH, MVP, other (EUR)	518612	rs1338443	RP11-686D16.1
Docherty et al., 2023	37777856	Suicide attempt	Meta-analysis of GWAS	UKB, PGC, iPSYCH, MVP, other (EUR)	518612	rs35869525	GUSBP2
Docherty et al., 2023	37777856	Suicide attempt	Meta-analysis of GWAS	UKB, PGC, iPSYCH, MVP, other (EUR)	518612	rs2503185	PDE4B
Docherty et al., 2023	37777856	Suicide attempt	Meta-analysis of GWAS	UKB, PGC, iPSYCH, MVP, other (multi ancestry)	958896	rs3791129	ST3GAL3
Docherty et al., 2023	37777856	Suicide attempt	Meta-analysis of GWAS	UKB, PGC, iPSYCH, MVP, other (multi ancestry)	958896	rs3791129	RP11-7O11.3
Docherty et al., 2023	37777856	Suicide attempt	Meta-analysis of GWAS	UKB, PGC, iPSYCH, MVP, other (multi ancestry)	958896	rs3791129	IPO13
Docherty et al., 2023	37777856	Suicide attempt	Meta-analysis of GWAS	UKB, PGC, iPSYCH, MVP, other (multi ancestry)	958896	rs3791129	CCDC24
Docherty et al., 2023	37777856	Suicide attempt	Meta-analysis of GWAS	UKB, PGC, iPSYCH, MVP, other (multi ancestry)	958896	rs3791129	SLC6A9
Docherty et al., 2023	37777856	Suicide attempt	Meta-analysis of GWAS	UKB, PGC, iPSYCH, MVP, other (multi ancestry)	958896	rs7649709	NLGN1
Docherty et al., 2023	37777856	Suicide attempt	Meta-analysis of GWAS	UKB, PGC, iPSYCH, MVP, other (multi ancestry)	958896	rs10946310;rs62404522	RP11-686D16.1
Docherty et al., 2023	37777856	Suicide attempt	Meta-analysis of GWAS	UKB, PGC, iPSYCH, MVP, other (multi ancestry)	958896	rs7131627;rs10891540;rs1124491	TTC12
Docherty et al., 2023	37777856	Suicide attempt	Meta-analysis of GWAS	UKB, PGC, iPSYCH, MVP, other (multi ancestry)	958896	rs10891540;rs7131627	RP11-159N11.4
Docherty et al., 2023	37777856	Suicide attempt	Meta-analysis of GWAS	UKB, PGC, iPSYCH, MVP, other (multi ancestry)	958896	rs7131627;rs1124491	ANKK1
Docherty et al., 2023	37777856	Suicide attempt	Meta-analysis of GWAS	UKB, PGC, iPSYCH, MVP, other (multi ancestry)	958896	rs7131627;rs1124491	RP11-159N11.3
Docherty et al., 2023	37777856	Suicide attempt	Meta-analysis of GWAS	UKB, PGC, iPSYCH, MVP, other (multi ancestry)	958896	rs1124491;rs7131627;rs17601612	DRD2
Docherty et al., 2023	37777856	Suicide attempt	Meta-analysis of GWAS	UKB, PGC, iPSYCH, MVP, other (multi ancestry)	958896	rs1124491;rs7131627;rs17601612	MIR4301
Docherty et al., 2023	37777856	Suicide attempt	Meta-analysis of GWAS	UKB, PGC, iPSYCH, MVP, other (multi ancestry)	958896	rs9525171	DNAJC3-AS1
Docherty et al., 2023	37777856	Suicide attempt	Meta-analysis of GWAS	UKB, PGC, iPSYCH, MVP, other (multi ancestry)	958896	rs9525171	DNAJC3
Docherty et al., 2023	37777856	Suicide attempt	Meta-analysis of GWAS	UKB, PGC, iPSYCH, MVP, other (multi ancestry)	958896	rs9525171	UGGT2
Docherty et al., 2023	37777856	Suicide attempt	Meta-analysis of GWAS	UKB, PGC, iPSYCH, MVP, other (multi ancestry)	958896	rs9525171	HS6ST3
Docherty et al., 2023	37777856	Suicide attempt	Meta-analysis of GWAS	UKB, PGC, iPSYCH, MVP, other (multi ancestry)	958896	rs17514846;rs2071382	FURIN
Docherty et al., 2023	37777856	Suicide attempt	Meta-analysis of GWAS	UKB, PGC, iPSYCH, MVP, other (multi ancestry)	958896	rs17514846;rs2071382	FES
Hatoum et al., 2023	36150907	Executive functions	GWAS	UKB	427037	rs35542623;rs35284403;rs10262862;rs12707087;rs12707117;rs2971970;rs1345938;rs12707100;rs35531336;rs7800006;rs6955279;rs7792010;rs10279261;rs7785128;rs4596578	EXOC4
Hatoum et al., 2023	36150907	Executive functions	GWAS	UKB	427037	rs2581789;rs6445539;rs2255107;rs2115780;rs77058023	RP11-894J14.5
Hatoum et al., 2023	36150907	Executive functions	GWAS	UKB	427037	rs2075650;rs157582;rs429358;rs10119;rs75627662;rs439401	TOMM40
Hatoum et al., 2023	36150907	Executive functions	GWAS	UKB	427037	rs10119;rs429358;rs75627662;rs2075650;rs439401;rs157592	APOE
Hatoum et al., 2023	36150907	Executive functions	GWAS	UKB	427037	rs429358;rs75627662;rs2075650;rs439401;rs157592	APOC1
Hatoum et al., 2023	36150907	Executive functions	GWAS	UKB	427037	rs2581789;rs6445539;rs35240333;rs2255107	TMEM110-MUSTN1
Hatoum et al., 2023	36150907	Executive functions	GWAS	UKB	427037	rs6445539;rs35240333;rs2581789;rs2255107	TMEM110
Hatoum et al., 2023	36150907	Executive functions	GWAS	UKB	427037	rs2581789;rs6445539;rs2255107;rs2115780;rs77058023	SFMBT1
Hatoum et al., 2023	36150907	Executive functions	GWAS	UKB	427037	rs12486554;rs13094687;rs7636227	STAB1
Hatoum et al., 2023	36150907	Executive functions	GWAS	UKB	427037	rs7636227;rs12486554;rs13094687	NT5DC2
Hatoum et al., 2023	36150907	Executive functions	GWAS	UKB	427037	rs7636227;rs12486554;rs13094687;rs7622851;rs35240333;rs2581789;rs6445539;rs2255107	SMIM4
Hatoum et al., 2023	36150907	Executive functions	GWAS	UKB	427037	rs12486554;rs7636227;rs13094687;rs2581789;rs77058023;rs6445539	ITIH3
Hatoum et al., 2023	36150907	Executive functions	GWAS	UKB	427037	rs7636227;rs12486554;rs2581789;rs77058023;rs6445539;rs35240333;rs2255107;rs13094687;rs2115780;rs7622851	ITIH4
Hatoum et al., 2023	36150907	Executive functions	GWAS	UKB	427037	rs7636227;rs12486554;rs2581789;rs77058023;rs6445539;rs35240333	RP5-966M1.6
Hatoum et al., 2023	36150907	Executive functions	GWAS	UKB	427037	rs2581789;rs6445539;rs35240333	MUSTN1
Hatoum et al., 2023	36150907	Executive functions	GWAS	UKB	427037	rs13262595;rs13282237	TSNARE1
Hatoum et al., 2023	36150907	Executive functions	GWAS	UKB	427037	rs2115780;rs2581789;rs6445539;rs2255107;rs77058023	RFT1
Hatoum et al., 2023	36150907	Executive functions	GWAS	UKB	427037	rs6955279;rs4596578:rs4596578:rs7792010:rs7785128	PLXNA4
Hatoum et al., 2023	36150907	Executive functions	GWAS	UKB	427037	rs6955279;rs4596578:rs4596578:rs7792010:rs7785128	AC009365.3
Hatoum et al., 2023	36150907	Executive functions	GWAS	UKB	427037	rs7636227;rs12486554;rs13094687;rs7622851;rs35240333	PBRM1
Hatoum et al., 2023	36150907	Executive functions	GWAS	UKB	427037	rs12486554;rs13094687;rs7636227;rs7622851;rs2115780;rs2581789;rs6445539;rs2255107	GNL3
Hatoum et al., 2023	36150907	Executive functions	GWAS	UKB	427037	rs12486554;rs7636227;rs13094687	GLT8D1
Hatoum et al., 2023	36150907	Executive functions	GWAS	UKB	427037	rs12486554;rs13094687;rs7636227;rs2115780	SPCS1
Hatoum et al., 2023	36150907	Executive functions	GWAS	UKB	427037	rs3850765;rs2280141;rs7896881;rs10887142;rs10887142:rs2280141:rs3850765:rs2280141;rs3850765:rs932275:rs7896881	PLEKHA1
Hatoum et al., 2023	36150907	Executive functions	GWAS	UKB	427037	rs932275;rs7896881;rs10887142:rs2280141:rs3850765:rs7896881:rs2280141;rs3850765	ARMS2
Hatoum et al., 2023	36150907	Executive functions	GWAS	UKB	427037	rs932275;rs7896881;rs10887142:rs2280141:rs3850765:rs7896881:rs2280141;rs3850765	HTRA1
Hatoum et al., 2023	36150907	Executive functions	GWAS	UKB	427037	rs3850765:rs2280141:rs2280141;rs3850765:rs10887142	OAT
Hatoum et al., 2023	36150907	Executive functions	GWAS	UKB	427037	rs12486554;rs13094687;rs7636227	NEK4
Hatoum et al., 2023	36150907	Executive functions	GWAS	UKB	427037	rs12486554;rs13094687;rs7636227	ITIH1
Hatoum et al., 2023	36150907	Executive functions	GWAS	UKB	427037	rs36120363;rs9368728;rs534042;rs12204597	TMEM170B
Hatoum et al., 2023	36150907	Executive functions	GWAS	UKB	427037	rs36120363;rs9368728:rs534042;rs12204597:rs36120363;rs534042:rs12204597:rs534042:rs36120363	EDN1
Hatoum et al., 2023	36150907	Executive functions	GWAS	UKB	427037	rs13019832;rs2678892:rs2862872:rs7582485:rs57270700	BCL11A
Hatoum et al., 2023	36150907	Executive functions	GWAS	UKB	427037	rs10883440;rs2862954;rs11596211;rs4148398	ERLIN1
Hatoum et al., 2023	36150907	Executive functions	GWAS	UKB	427037	rs754064;rs6095319;rs13044736;rs2145839	PREX1
Hatoum et al., 2023	36150907	Executive functions	GWAS	UKB	427037	rs11808051:rs79536980:rs355377:rs17385037;rs61788584;rs17381287:rs17381287:rs11808051;rs355377:rs978346:rs17385037;rs61788584:rs61788584	RP11-147C23.1
Hatoum et al., 2023	36150907	Executive functions	GWAS	UKB	427037	rs9472022;rs79541366;rs144767533;rs113113059	SRF
Hatoum et al., 2023	36150907	Executive functions	GWAS	UKB	427037	rs144767533;rs79541366;rs9472022;rs113113059;rs6917902;rs111342015;rs2651205	CUL9
Hatoum et al., 2023	36150907	Executive functions	GWAS	UKB	427037	rs74729488;rs72772387;rs117583711;rs12932206;rs12597701;rs1213323;rs720717;rs9934226;rs4780790;rs28550823	GRIN2A
Hatoum et al., 2023	36150907	Executive functions	GWAS	UKB	427037	rs191549504	SYNGAP1
Hatoum et al., 2023	36150907	Executive functions	GWAS	UKB	427037	rs9472022;rs113113059;rs6917902;rs144767533;rs79541366;rs111342015;rs2651205	DNPH1
Hatoum et al., 2023	36150907	Executive functions	GWAS	UKB	427037	rs749694;rs2735421;rs2305192;rs11191203	MGEA5
Hatoum et al., 2023	36150907	Executive functions	GWAS	UKB	427037	rs10883668;rs4919559;rs749694;rs2735421:rs2735421:rs2305192:rs11191203	DPCD
Hatoum et al., 2023	36150907	Executive functions	GWAS	UKB	427037	rs10883668;rs4919559;rs749694;rs2735421:rs2735421:rs2305192:rs11191203	POLL
Hatoum et al., 2023	36150907	Executive functions	GWAS	UKB	427037	rs2305192;rs749694;rs2735421;rs11191203;rs4919559;rs10883668	C10orf76
Hatoum et al., 2023	36150907	Executive functions	GWAS	UKB	427037	rs749694;rs2735421;rs2305192	KCNIP2
Hatoum et al., 2023	36150907	Executive functions	GWAS	UKB	427037	rs7715034;rs11959119;rs1363292:rs201435949:rs6881733	NR2F1
Hatoum et al., 2023	36150907	Executive functions	GWAS	UKB	427037	rs6982765:rs17549128:rs17549128;rs4909564	KHDRBS3
Hatoum et al., 2023	36150907	Executive functions	GWAS	UKB	427037	rs4500960;rs6741949	SLC4A10
Hatoum et al., 2023	36150907	Executive functions	GWAS	UKB	427037	rs11808051;rs79536980;rs11808051:rs79536980:rs59841749	DPYD
Hatoum et al., 2023	36150907	Executive functions	GWAS	UKB	427037	rs4500960;rs6741949	DPP4
Hatoum et al., 2023	36150907	Executive functions	GWAS	UKB	427037	rs35240333;rs12486554;rs13094687;rs7622851;rs7636227;rs6445539;rs2581789;rs2115780	GLYCTK
Hatoum et al., 2023	36150907	Executive functions	GWAS	UKB	427037	rs2075650;rs157582;rs429358	PVRL2
Hatoum et al., 2023	36150907	Executive functions	GWAS	UKB	427037	rs7622851;rs13094687;rs12486554	TLR9
Hatoum et al., 2023	36150907	Executive functions	GWAS	UKB	427037	rs7622851;rs13094687	TLR9
Hatoum et al., 2023	36150907	Executive functions	GWAS	UKB	427037	rs7622851;rs13094687;rs12486554	TWF2
Hatoum et al., 2023	36150907	Executive functions	GWAS	UKB	427037	rs7622851;rs12486554;rs13094687;rs35240333;rs6445539;rs2581789;rs2255107;rs7636227	PPM1M
Hatoum et al., 2023	36150907	Executive functions	GWAS	UKB	427037	rs12486554;rs13094687;rs7622851;rs35240333;rs2581789;rs6445539;rs2255107;rs7636227	WDR82
Hatoum et al., 2023	36150907	Executive functions	GWAS	UKB	427037	rs7641050;rs55662945;rs11707940;rs9883813;rs13086611	USP4
Hatoum et al., 2023	36150907	Executive functions	GWAS	UKB	427037	rs13086611;rs7641050;rs9883813	GPX1
Hatoum et al., 2023	36150907	Executive functions	GWAS	UKB	427037	rs7641050;rs13086611;rs55662945;rs9883813	RHOA
Hatoum et al., 2023	36150907	Executive functions	GWAS	UKB	427037	rs11959119;rs4547912	FAM172A
Hatoum et al., 2023	36150907	Executive functions	GWAS	UKB	427037	rs7641050;rs13086611;rs55662945;rs9883813	DAG1
Hatoum et al., 2023	36150907	Executive functions	GWAS	UKB	427037	rs7641050;rs13086611	TCTA
Hatoum et al., 2023	36150907	Executive functions	GWAS	UKB	427037	rs13086611;rs7641050;rs55662945	NICN1
Hatoum et al., 2023	36150907	Executive functions	GWAS	UKB	427037	rs144767533;rs111342015;rs2651205;rs6930150;rs6916038	TTBK1
Hatoum et al., 2023	36150907	Executive functions	GWAS	UKB	427037	rs7641050;rs13086611;rs55662945;rs9883813	AMT
Hatoum et al., 2023	36150907	Executive functions	GWAS	UKB	427037	rs13094687;rs12486554	NISCH
Hatoum et al., 2023	36150907	Executive functions	GWAS	UKB	427037	rs115775530;rs79586148;rs5745577	BAK1
Hatoum et al., 2023	36150907	Executive functions	GWAS	UKB	427037	rs13094687;rs7622851;rs35240333	PHF7
Hatoum et al., 2023	36150907	Executive functions	GWAS	UKB	427037	rs7622851;rs35240333;rs7636227;rs12486554;rs13094687	SEMA3G
Hatoum et al., 2023	36150907	Executive functions	GWAS	UKB	427037	rs8023459	TLE3
Hatoum et al., 2023	36150907	Executive functions	GWAS	UKB	427037	rs8061968;rs9926479	RBFOX1
Hatoum et al., 2023	36150907	Executive functions	GWAS	UKB	427037	rs749694;rs2735421;rs11191203;rs61874768	HPS6
Hatoum et al., 2023	36150907	Executive functions	GWAS	UKB	427037	rs139507;rs4822002;rs2273085	RANGAP1
Hatoum et al., 2023	36150907	Executive functions	GWAS	UKB	427037	rs2901437;rs6718843;rs62150702;rs12997018	ALMS1
Hatoum et al., 2023	36150907	Executive functions	GWAS	UKB	427037	rs79541366;rs9472022;rs144767533;rs6916038;rs113113059;rs6917902	PTK7
Hatoum et al., 2023	36150907	Executive functions	GWAS	UKB	427037	rs2273085;rs139507;rs4822002	ZC3H7B
Hatoum et al., 2023	36150907	Executive functions	GWAS	UKB	427037	rs2273085;rs139507;rs4822002	CHADL
Hatoum et al., 2023	36150907	Executive functions	GWAS	UKB	427037	rs1885163;rs11908055	CSE1L
Hatoum et al., 2023	36150907	Executive functions	GWAS	UKB	427037	rs309171;rs4954387;rs55691047;rs309171:rs4954387	DARS
Hatoum et al., 2023	36150907	Executive functions	GWAS	UKB	427037	rs4547912	KIAA0825
Hatoum et al., 2023	36150907	Executive functions	GWAS	UKB	427037	rs309171:rs4954387	CXCR4
Hatoum et al., 2023	36150907	Executive functions	GWAS	UKB	427037	rs749694;rs2735421;rs10883668:rs4919559	FGF8
Hatoum et al., 2023	36150907	Executive functions	GWAS	UKB	427037	rs749694;rs2735421;rs10883668:rs4919559	NPM3
Hatoum et al., 2023	36150907	Executive functions	GWAS	UKB	427037	rs11908055;rs1885163	ARFGEF2
Hatoum et al., 2023	36150907	Executive functions	GWAS	UKB	427037	rs2273085;rs139507;rs4822002	L3MBTL2
Hatoum et al., 2023	36150907	Executive functions	GWAS	UKB	427037	rs139507;rs2273085;rs4822002	AL035681.1
Hatoum et al., 2023	36150907	Executive functions	GWAS	UKB	427037	rs2075654;rs7131440	DRD2
Hatoum et al., 2023	36150907	Executive functions	GWAS	UKB	427037	rs2684641;rs2037442;rs71375338;rs1724438;rs199441;rs55938136;rs9899833	ARHGAP27
Hatoum et al., 2023	36150907	Executive functions	GWAS	UKB	427037	rs2037442;rs2684641;rs71375338;rs1724438;rs199441;rs55938136;rs9899833	PLEKHM1
Hatoum et al., 2023	36150907	Executive functions	GWAS	UKB	427037	rs28606370;rs284855	C10orf32-ASMT
Hatoum et al., 2023	36150907	Executive functions	GWAS	UKB	427037	rs28606370;rs284855	AS3MT
Hatoum et al., 2023	36150907	Executive functions	GWAS	UKB	427037	rs28606370	CNNM2
Hatoum et al., 2023	36150907	Executive functions	GWAS	UKB	427037	rs2684641;rs71375338;rs1724438;rs199441;rs17698176	ARL17B
Hatoum et al., 2023	36150907	Executive functions	GWAS	UKB	427037	rs11596211;rs10883440	CPN1
Hatoum et al., 2023	36150907	Executive functions	GWAS	UKB	427037	rs2684641;rs71375338;rs1724438;rs199441;rs55938136;rs2037442;rs9899833;rs17698176	CRHR1
Hatoum et al., 2023	36150907	Executive functions	GWAS	UKB	427037	rs73186008;rs76524064;rs55658584	SRPK2
Hatoum et al., 2023	36150907	Executive functions	GWAS	UKB	427037	rs2862954;rs11596211;rs10883440;rs717620;rs4148398	CWF19L1
Hatoum et al., 2023	36150907	Executive functions	GWAS	UKB	427037	rs2862954;rs11596211;rs10883440	BLOC1S2
Hatoum et al., 2023	36150907	Executive functions	GWAS	UKB	427037	rs3814880;rs3814878;rs55732507;rs2289292	INO80E
Hatoum et al., 2023	36150907	Executive functions	GWAS	UKB	427037	rs3814880;rs3814878	DOC2A
Hatoum et al., 2023	36150907	Executive functions	GWAS	UKB	427037	rs13094687	BAP1
Hatoum et al., 2023	36150907	Executive functions	GWAS	UKB	427037	rs3814880;rs3814878	TAOK2
Hatoum et al., 2023	36150907	Executive functions	GWAS	UKB	427037	rs3814880;rs3814878	HIRIP3
Hatoum et al., 2023	36150907	Executive functions	GWAS	UKB	427037	rs28606370;rs284855	NT5C2
Hatoum et al., 2023	36150907	Executive functions	GWAS	UKB	427037	rs28606370	RPEL1
Hatoum et al., 2023	36150907	Executive functions	GWAS	UKB	427037	rs28606370	INA
Hatoum et al., 2023	36150907	Executive functions	GWAS	UKB	427037	rs3814880;rs55732507;rs3814878	TMEM219
Hatoum et al., 2023	36150907	Executive functions	GWAS	UKB	427037	rs7641050;rs9883813;rs13086611;rs55662945;rs11707940	BSN
Hatoum et al., 2023	36150907	Executive functions	GWAS	UKB	427037	rs28606370;rs284855	C10orf32
Hatoum et al., 2023	36150907	Executive functions	GWAS	UKB	427037	rs309171;rs4954387	MCM6
Hatoum et al., 2023	36150907	Executive functions	GWAS	UKB	427037	rs284855;rs28606370	WBP1L
Hatoum et al., 2023	36150907	Executive functions	GWAS	UKB	427037	rs11672035	NFIC
Hatoum et al., 2023	36150907	Executive functions	GWAS	UKB	427037	rs2273085;rs4822002;rs139507	EP300
Hatoum et al., 2023	36150907	Executive functions	GWAS	UKB	427037	rs11202929;rs6585994;rs4934169;rs9633740;rs4933397;rs873257;rs11202815	TSPAN14
Hatoum et al., 2023	36150907	Executive functions	GWAS	UKB	427037	rs1885163;rs11908055	STAU1
Hatoum et al., 2023	36150907	Executive functions	GWAS	UKB	427037	rs7131440;rs2075654	ANKK1
Hatoum et al., 2023	36150907	Executive functions	GWAS	UKB	427037	rs10883440;rs2862954;rs11596211	CHUK
Hatoum et al., 2023	36150907	Executive functions	GWAS	UKB	427037	rs2693672	VRK1
Hatoum et al., 2023	36150907	Executive functions	GWAS	UKB	427037	rs2693672	BCL11B
Hatoum et al., 2023	36150907	Executive functions	GWAS	UKB	427037	rs62150702;rs12997018	C2orf78
Hatoum et al., 2023	36150907	Executive functions	GWAS	UKB	427037	rs12210880:rs1033956:rs607237:rs664154:rs1207106;rs12210880:rs12528805:rs72828517	ID4
Hatoum et al., 2023	36150907	Executive functions	GWAS	UKB	427037	rs73186008	KMT2E
Hatoum et al., 2023	36150907	Executive functions	GWAS	UKB	427037	rs2684641;rs71375338;rs1724438;rs199441;rs55938136;rs9899833;rs17698176;rs1724438:rs2684641	SPPL2C
Hatoum et al., 2023	36150907	Executive functions	GWAS	UKB	427037	rs1114162;rs59952658	RIMS4
Hatoum et al., 2023	36150907	Executive functions	GWAS	UKB	427037	rs11772435	AUTS2
Hatoum et al., 2023	36150907	Executive functions	GWAS	UKB	427037	rs3814878;rs3814880;rs2289292	PPP4C
Hatoum et al., 2023	36150907	Executive functions	GWAS	UKB	427037	rs3814878;rs3814880;rs2289292;rs55732507	TBX6
Hatoum et al., 2023	36150907	Executive functions	GWAS	UKB	427037	rs3814880;rs3814878;rs2289292;rs55732507	YPEL3
Hatoum et al., 2023	36150907	Executive functions	GWAS	UKB	427037	rs2684641;rs71375338;rs1724438;rs199441;rs9899833;rs17698176;rs55938136;rs35937770	MAPT
Hatoum et al., 2023	36150907	Executive functions	GWAS	UKB	427037	rs1114162;rs59952658:rs59952658:rs1114162	YWHAB
Hatoum et al., 2023	36150907	Executive functions	GWAS	UKB	427037	rs2678892;rs13019832	VRK2
Hatoum et al., 2023	36150907	Executive functions	GWAS	UKB	427037	rs13086611	APEH
Hatoum et al., 2023	36150907	Executive functions	GWAS	UKB	427037	rs13086611;rs55662945	MST1
Hatoum et al., 2023	36150907	Executive functions	GWAS	UKB	427037	rs13086611;rs55662945	RNF123
Hatoum et al., 2023	36150907	Executive functions	GWAS	UKB	427037	rs2862954;rs11596211	PKD2L1
Hatoum et al., 2023	36150907	Executive functions	GWAS	UKB	427037	rs7994762	RFXAP
Hatoum et al., 2023	36150907	Executive functions	GWAS	UKB	427037	rs61738821	BAIAP2
Hatoum et al., 2023	36150907	Executive functions	GWAS	UKB	427037	rs61738821	AATK
Hatoum et al., 2023	36150907	Executive functions	GWAS	UKB	427037	rs2652456	KCNJ3
Hatoum et al., 2023	36150907	Executive functions	GWAS	UKB	427037	rs13064990	TBC1D5
Hatoum et al., 2023	36150907	Executive functions	GWAS	UKB	427037	rs13197257	PTPRK
Hatoum et al., 2023	36150907	Executive functions	GWAS	UKB	427037	rs4547912	POU5F2
Hatoum et al., 2023	36150907	Executive functions	GWAS	UKB	427037	rs3814878;rs3814880	C16orf92
Hatoum et al., 2023	36150907	Executive functions	GWAS	UKB	427037	rs3814880;rs3814878	FAM57B
Hatoum et al., 2023	36150907	Executive functions	GWAS	UKB	427037	rs55691047;rs17654195	THSD7B
Hatoum et al., 2023	36150907	Executive functions	GWAS	UKB	427037	rs10883668;rs2735421	FBXW4
Hatoum et al., 2023	36150907	Executive functions	GWAS	UKB	427037	rs2684641;rs71375338;rs1724438;rs199441;rs17698176;rs55938136;rs9899833;rs35937770;rs2037442	KANSL1
Hatoum et al., 2023	36150907	Executive functions	GWAS	UKB	427037	rs10797119	GADD45G
Hatoum et al., 2023	36150907	Executive functions	GWAS	UKB	427037	rs1388744	ANKS1B
Hatoum et al., 2023	36150907	Executive functions	GWAS	UKB	427037	rs71375338;rs1724438;rs199441;rs2684641;rs17698176;rs55938136;rs9899833;rs35937770	LRRC37A
Hatoum et al., 2023	36150907	Executive functions	GWAS	UKB	427037	rs62150702;rs12997018	DUSP11
Hatoum et al., 2023	36150907	Executive functions	GWAS	UKB	427037	rs2212450;rs2212450:rs2000919	NCAM1
Hatoum et al., 2023	36150907	Executive functions	GWAS	UKB	427037	rs10462335;rs27732;rs27732:rs27732:rs10462335	MEF2C
Hatoum et al., 2023	36150907	Executive functions	GWAS	UKB	427037	rs284855;rs28606370	CYP17A1
Hatoum et al., 2023	36150907	Executive functions	GWAS	UKB	427037	rs3814878;rs3814880	ALDOA
Hatoum et al., 2023	36150907	Executive functions	GWAS	UKB	427037	rs6930150;rs6916038	SLC22A7
Hatoum et al., 2023	36150907	Executive functions	GWAS	UKB	427037	rs2421407;rs60195712	RAB11FIP5
Hatoum et al., 2023	36150907	Executive functions	GWAS	UKB	427037	rs4954387;rs309171	LCT
Hatoum et al., 2023	36150907	Executive functions	GWAS	UKB	427037	rs1956001	NPAS3
Hatoum et al., 2023	36150907	Executive functions	GWAS	UKB	427037	rs2901437;rs62150702;rs12997018;rs6718843	NAT8
Hatoum et al., 2023	36150907	Executive functions	GWAS	UKB	427037	rs27732:rs10462335	CETN3
Hatoum et al., 2023	36150907	Executive functions	GWAS	UKB	427037	rs10462335;rs27732:rs27732	MBLAC2
Hatoum et al., 2023	36150907	Executive functions	GWAS	UKB	427037	rs10462335;rs27732:rs27732	POLR3G
Hatoum et al., 2023	36150907	Executive functions	GWAS	UKB	427037	rs27732:rs10462335;rs27732	LYSMD3
Hatoum et al., 2023	36150907	Executive functions	GWAS	UKB	427037	rs27732:rs10462335;rs27732	GPR98
Hatoum et al., 2023	36150907	Executive functions	GWAS	UKB	427037	rs2684641;rs71375338;rs1724438;rs199441;rs2037442;rs55938136;rs9899833;rs17698176;rs35937770	STH
Hatoum et al., 2023	36150907	Executive functions	GWAS	UKB	427037	rs7622851;rs13094687;rs12486554	DNAH1
Hatoum et al., 2023	36150907	Executive functions	GWAS	UKB	427037	rs12716979	STX1B
Hatoum et al., 2023	36150907	Executive functions	GWAS	UKB	427037	rs4702	FURIN
Hatoum et al., 2023	36150907	Executive functions	GWAS	UKB	427037	rs4702	FES
Hatoum et al., 2023	36150907	Executive functions	GWAS	UKB	427037	rs6585994;rs4934169;rs11202815;rs11202929;rs9633740	FAM213A
Hatoum et al., 2023	36150907	Executive functions	GWAS	UKB	427037	rs1249429;rs13025185	LRP1B
Hatoum et al., 2023	36150907	Executive functions	GWAS	UKB	427037	rs7622851;rs13094687	ALAS1
Hatoum et al., 2023	36150907	Executive functions	GWAS	UKB	427037	rs1959410	TLE1
Hatoum et al., 2023	36150907	Executive functions	GWAS	UKB	427037	rs6705712	GPR75-ASB3
Hatoum et al., 2023	36150907	Executive functions	GWAS	UKB	427037	rs6705712	ASB3
Hatoum et al., 2023	36150907	Executive functions	GWAS	UKB	427037	rs709692	LPHN2
Hatoum et al., 2023	36150907	Executive functions	GWAS	UKB	427037	rs7994762	SERTM1
Hatoum et al., 2023	36150907	Executive functions	GWAS	UKB	427037	rs717620;rs4148398	ABCC2
Hatoum et al., 2023	36150907	Executive functions	GWAS	UKB	427037	rs27732	CCNH
Hatoum et al., 2023	36150907	Executive functions	GWAS	UKB	427037	rs27732;rs27774:rs27732	TMEM161B
Hatoum et al., 2023	36150907	Executive functions	GWAS	UKB	427037	rs17698176;rs199441;rs71375338;rs35937770;rs2684641;rs1724438	NSF
Hatoum et al., 2023	36150907	Executive functions	GWAS	UKB	427037	rs6705712	PSME4
Hatoum et al., 2023	36150907	Executive functions	GWAS	UKB	427037	rs10964203	SLC24A2
Hatoum et al., 2023	36150907	Executive functions	GWAS	UKB	427037	rs7641050;rs55662945;rs13086611	IP6K2
Hatoum et al., 2023	36150907	Executive functions	GWAS	UKB	427037	rs35214871	CAB39L
Hatoum et al., 2023	36150907	Executive functions	GWAS	UKB	427037	rs12172958;rs6804058	OSBPL10
Hatoum et al., 2023	36150907	Executive functions	GWAS	UKB	427037	rs2454202;rs10010325	TET2
Hatoum et al., 2023	36150907	Executive functions	GWAS	UKB	427037	rs233457	KIAA0556
Hatoum et al., 2023	36150907	Executive functions	GWAS	UKB	427037	rs12716979	FBXL19
Hatoum et al., 2023	36150907	Executive functions	GWAS	UKB	427037	rs2413631	XPNPEP3
Hatoum et al., 2023	36150907	Executive functions	GWAS	UKB	427037	rs2413631	RBX1
Hatoum et al., 2023	36150907	Executive functions	GWAS	UKB	427037	rs12716979	ORAI3
Hatoum et al., 2023	36150907	Executive functions	GWAS	UKB	427037	rs62150702;rs12997018;rs2901437;rs6718843	TPRKB
Hatoum et al., 2023	36150907	Executive functions	GWAS	UKB	427037	rs2271763	NAV1
Hatoum et al., 2023	36150907	Executive functions	GWAS	UKB	427037	rs2271763	IPO9
Hatoum et al., 2023	36150907	Executive functions	GWAS	UKB	427037	rs7641050;rs55662945;rs9883813	QRICH1
Hatoum et al., 2023	36150907	Executive functions	GWAS	UKB	427037	rs55662945;rs7641050;rs9883813	QARS
Hatoum et al., 2023	36150907	Executive functions	GWAS	UKB	427037	rs2413631	SLC25A17
Hatoum et al., 2023	36150907	Executive functions	GWAS	UKB	427037	rs2413631	ST13
Hatoum et al., 2023	36150907	Executive functions	GWAS	UKB	427037	rs12716979	ZNF646
Hatoum et al., 2023	36150907	Executive functions	GWAS	UKB	427037	rs12716979	PRSS53
Hatoum et al., 2023	36150907	Executive functions	GWAS	UKB	427037	rs12716979	RP11-196G11.1
Hatoum et al., 2023	36150907	Executive functions	GWAS	UKB	427037	rs12716979	VKORC1
Hatoum et al., 2023	36150907	Executive functions	GWAS	UKB	427037	rs3747973;rs823154	SLC41A1
Hatoum et al., 2023	36150907	Executive functions	GWAS	UKB	427037	rs7641050;rs55662945;rs9883813	WDR6
Hatoum et al., 2023	36150907	Executive functions	GWAS	UKB	427037	rs55662945;rs7641050;rs9883813	DALRD3
Hatoum et al., 2023	36150907	Executive functions	GWAS	UKB	427037	rs7641050;rs55662945	NDUFAF3
Hatoum et al., 2023	36150907	Executive functions	GWAS	UKB	427037	rs7641050;rs55662945	IMPDH2
Hatoum et al., 2023	36150907	Executive functions	GWAS	UKB	427037	rs12716979	BCKDK
Hatoum et al., 2023	36150907	Executive functions	GWAS	UKB	427037	rs6804058;rs12172958	STT3B
Hatoum et al., 2023	36150907	Executive functions	GWAS	UKB	427037	rs5745577	GGNBP1
Hatoum et al., 2023	36150907	Executive functions	GWAS	UKB	427037	rs235924	PROX1
Hatoum et al., 2023	36150907	Executive functions	GWAS	UKB	427037	rs11903228:rs4513295	VSNL1
Hatoum et al., 2023	36150907	Executive functions	GWAS	UKB	427037	rs12716979	ZNF668
Hatoum et al., 2023	36150907	Executive functions	GWAS	UKB	427037	rs12716979	ZNF668
Hatoum et al., 2023	36150907	Executive functions	GWAS	UKB	427037	rs2271763	LMOD1
Hatoum et al., 2023	36150907	Executive functions	GWAS	UKB	427037	rs9883813;rs7641050;rs55662945	NCKIPSD
Hatoum et al., 2023	36150907	Executive functions	GWAS	UKB	427037	rs12716979	PHKG2
Hatoum et al., 2023	36150907	Executive functions	GWAS	UKB	427037	rs12716979	C16orf93
Hatoum et al., 2023	36150907	Executive functions	GWAS	UKB	427037	rs12716979	RNF40
Hatoum et al., 2023	36150907	Executive functions	GWAS	UKB	427037	rs12716979	ZNF629
Hatoum et al., 2023	36150907	Executive functions	GWAS	UKB	427037	rs12716979	CTF1
Hatoum et al., 2023	36150907	Executive functions	GWAS	UKB	427037	rs12716979	STX4
Hatoum et al., 2023	36150907	Executive functions	GWAS	UKB	427037	rs12716979	BCL7C
Hatoum et al., 2023	36150907	Executive functions	GWAS	UKB	427037	rs6067269	SPATA2
Hatoum et al., 2023	36150907	Executive functions	GWAS	UKB	427037	rs55662945;rs7641050;rs9883813	P4HTM
Hatoum et al., 2023	36150907	Executive functions	GWAS	UKB	427037	rs233457	GTF3C1
Hatoum et al., 2023	36150907	Executive functions	GWAS	UKB	427037	rs3814878;rs3814880;rs2289292;rs55732507;rs7404371	GDPD3
Hatoum et al., 2023	36150907	Executive functions	GWAS	UKB	427037	rs3814880;rs3814878;rs2289292;rs55732507;rs7404371	MAPK3
Hatoum et al., 2023	36150907	Executive functions	GWAS	UKB	427037	rs7641050;rs55662945	ARIH2
Hatoum et al., 2023	36150907	Executive functions	GWAS	UKB	427037	rs61874768;rs2305192;rs11191203	LDB1
Hatoum et al., 2023	36150907	Executive functions	GWAS	UKB	427037	rs149479706;rs149479706:rs73395314	HIST1H2BE
Hatoum et al., 2023	36150907	Executive functions	GWAS	UKB	427037	rs149479706;rs149479706:rs73395314	HIST1H4D
Hatoum et al., 2023	36150907	Executive functions	GWAS	UKB	427037	rs149479706;rs149479706:rs73395314	HIST1H3D
Hatoum et al., 2023	36150907	Executive functions	GWAS	UKB	427037	rs149479706;rs149479706:rs73395314	HIST1H2AD
Hatoum et al., 2023	36150907	Executive functions	GWAS	UKB	427037	rs149479706;rs149479706:rs73395314	HIST1H2BF
Hatoum et al., 2023	36150907	Executive functions	GWAS	UKB	427037	rs149479706;rs149479706:rs73395314	HIST1H4E
Hatoum et al., 2023	36150907	Executive functions	GWAS	UKB	427037	rs149479706;rs149479706:rs73395314	HIST1H2BG
Hatoum et al., 2023	36150907	Executive functions	GWAS	UKB	427037	rs149479706;rs149479706:rs73395314	HIST1H2AE
Hatoum et al., 2023	36150907	Executive functions	GWAS	UKB	427037	rs149479706;rs73395314;rs149479706:rs73395314	HIST1H3E
Hatoum et al., 2023	36150907	Executive functions	GWAS	UKB	427037	rs149479706;rs73395314;rs149479706:rs73395314	HIST1H1D
Hatoum et al., 2023	36150907	Executive functions	GWAS	UKB	427037	rs73395314;rs149479706:rs73395314	HIST1H3G
Hatoum et al., 2023	36150907	Executive functions	GWAS	UKB	427037	rs73395314;rs149479706:rs73395314	HIST1H2BI
Hatoum et al., 2023	36150907	Executive functions	GWAS	UKB	427037	rs73395314;rs149479706:rs73395314	HIST1H4H
Hatoum et al., 2023	36150907	Executive functions	GWAS	UKB	427037	rs73395314:rs149479706:rs73395314;rs149479706	HMGN4
Hatoum et al., 2023	36150907	Executive functions	GWAS	UKB	427037	rs149479706:rs73395314	HIST1H2BJ
Hatoum et al., 2023	36150907	Executive functions	GWAS	UKB	427037	rs149479706:rs73395314	HIST1H2AG
Hatoum et al., 2023	36150907	Executive functions	GWAS	UKB	427037	rs149479706:rs73395314	HIST1H2BK
Hatoum et al., 2023	36150907	Executive functions	GWAS	UKB	427037	rs149479706:rs73395314	HIST1H4I
Hatoum et al., 2023	36150907	Executive functions	GWAS	UKB	427037	rs149479706:rs73395314	HIST1H2AH
Hatoum et al., 2023	36150907	Executive functions	GWAS	UKB	427037	rs149479706:rs73395314	HIST1H2BL
Hatoum et al., 2023	36150907	Executive functions	GWAS	UKB	427037	rs149479706:rs73395314	HIST1H2AI
Hatoum et al., 2023	36150907	Executive functions	GWAS	UKB	427037	rs149479706:rs73395314	HIST1H3H
Hatoum et al., 2023	36150907	Executive functions	GWAS	UKB	427037	rs149479706:rs73395314	HIST1H2AJ
Hatoum et al., 2023	36150907	Executive functions	GWAS	UKB	427037	rs149479706:rs73395314	HIST1H2BM
Hatoum et al., 2023	36150907	Executive functions	GWAS	UKB	427037	rs149479706:rs73395314	HIST1H4J
Hatoum et al., 2023	36150907	Executive functions	GWAS	UKB	427037	rs149479706:rs73395314	HIST1H4K
Hatoum et al., 2023	36150907	Executive functions	GWAS	UKB	427037	rs149479706:rs73395314	HIST1H2AK
Hatoum et al., 2023	36150907	Executive functions	GWAS	UKB	427037	rs149479706:rs73395314	HIST1H2BN
Hatoum et al., 2023	36150907	Executive functions	GWAS	UKB	427037	rs149479706:rs73395314	HIST1H2AL
Hatoum et al., 2023	36150907	Executive functions	GWAS	UKB	427037	rs149479706:rs73395314	HIST1H1B
Hatoum et al., 2023	36150907	Executive functions	GWAS	UKB	427037	rs149479706:rs73395314	HIST1H3I
Hatoum et al., 2023	36150907	Executive functions	GWAS	UKB	427037	rs149479706:rs73395314	HIST1H4L
Hatoum et al., 2023	36150907	Executive functions	GWAS	UKB	427037	rs149479706:rs73395314	HIST1H3J
Hatoum et al., 2023	36150907	Executive functions	GWAS	UKB	427037	rs149479706:rs73395314	HIST1H2AM
Hatoum et al., 2023	36150907	Executive functions	GWAS	UKB	427037	rs149479706:rs73395314	HIST1H2BO
Hatoum et al., 2023	36150907	Executive functions	GWAS	UKB	427037	rs149479706:rs73395314	OR2B2
Hatoum et al., 2023	36150907	Executive functions	GWAS	UKB	427037	rs3747973;rs823154	NUCKS1
Hatoum et al., 2023	36150907	Executive functions	GWAS	UKB	427037	rs823154;rs3747973	AC119673.1
Hatoum et al., 2023	36150907	Executive functions	GWAS	UKB	427037	rs34514948	NDST4
Hatoum et al., 2023	36150907	Executive functions	GWAS	UKB	427037	rs34514948	NDST3
Hatoum et al., 2023	36150907	Executive functions	GWAS	UKB	427037	rs2271763	SHISA4
Hatoum et al., 2023	36150907	Executive functions	GWAS	UKB	427037	rs9851068	UBE2E1
Hatoum et al., 2023	36150907	Executive functions	GWAS	UKB	427037	rs55662945;rs7641050	SLC25A20
Hatoum et al., 2023	36150907	Executive functions	GWAS	UKB	427037	rs7641050;rs55662945	ARIH2OS
Hatoum et al., 2023	36150907	Executive functions	GWAS	UKB	427037	rs13107325	DDIT4L
Hatoum et al., 2023	36150907	Executive functions	GWAS	UKB	427037	rs13107325	SLC39A8
Hatoum et al., 2023	36150907	Executive functions	GWAS	UKB	427037	rs73395314	ABT1
Hatoum et al., 2023	36150907	Executive functions	GWAS	UKB	427037	rs3021083	TCF20
Hatoum et al., 2023	36150907	Executive functions	GWAS	UKB	427037	rs34514948	MTRNR2L13
Hatoum et al., 2023	36150907	Executive functions	GWAS	UKB	427037	rs3021083	43711
Hatoum et al., 2023	36150907	Executive functions	GWAS	UKB	427037	rs3021083;rs4822002;rs2273085	WBP2NL
Hatoum et al., 2023	36150907	Executive functions	GWAS	UKB	427037	rs55662945;rs7641050	PRKAR2A
Hatoum et al., 2023	36150907	Executive functions	GWAS	UKB	427037	rs7981260	SUCLA2
Hatoum et al., 2023	36150907	Executive functions	GWAS	UKB	427037	rs12716979	SETD1A
Hatoum et al., 2023	36150907	Executive functions	GWAS	UKB	427037	rs933717	FBXO31
Hatoum et al., 2023	36150907	Executive functions	GWAS	UKB	427037	rs933717	MAP1LC3B
Hatoum et al., 2023	36150907	Executive functions	GWAS	UKB	427037	rs10887142	BTBD16
Hatoum et al., 2023	36150907	Executive functions	GWAS	UKB	427037	rs36061829	SHISA9
Hatoum et al., 2023	36150907	Executive functions	GWAS	UKB	427037	rs6699558	HCRTR1
Hatoum et al., 2023	36150907	Executive functions	GWAS	UKB	427037	rs6699558	PEF1
Hatoum et al., 2023	36150907	Executive functions	GWAS	UKB	427037	rs149479706;rs73395314;rs149479706:rs73395314	HIST1H4G
Hatoum et al., 2023	36150907	Executive functions	GWAS	UKB	427037	rs149479706;rs73395314;rs149479706:rs73395314	HIST1H3F
Hatoum et al., 2023	36150907	Executive functions	GWAS	UKB	427037	rs73395314;rs149479706;rs149479706:rs73395314	HIST1H2BH
Hatoum et al., 2023	36150907	Executive functions	GWAS	UKB	427037	rs11121053	KCNAB2
Hatoum et al., 2023	36150907	Executive functions	GWAS	UKB	427037	rs3747973;rs823154	RAB7L1
Hatoum et al., 2023	36150907	Executive functions	GWAS	UKB	427037	rs27989	MAST4
Hatoum et al., 2023	36150907	Executive functions	GWAS	UKB	427037	rs2289292;rs3814880;rs55732507	KCTD13
Hatoum et al., 2023	36150907	Executive functions	GWAS	UKB	427037	rs199441;rs17698176;rs35937770	WNT3
Hatoum et al., 2023	36150907	Executive functions	GWAS	UKB	427037	rs11121053	AL035406.1
Hatoum et al., 2023	36150907	Executive functions	GWAS	UKB	427037	rs55662945;rs7641050;rs9883813	CCDC36
Hatoum et al., 2023	36150907	Executive functions	GWAS	UKB	427037	rs6916038	CRIP3
Hatoum et al., 2023	36150907	Executive functions	GWAS	UKB	427037	rs12716979	KAT8
Hatoum et al., 2023	36150907	Executive functions	GWAS	UKB	427037	rs12716979	PRSS8
Hatoum et al., 2023	36150907	Executive functions	GWAS	UKB	427037	rs12716979	PRSS36
Hatoum et al., 2023	36150907	Executive functions	GWAS	UKB	427037	rs823154;rs3747973	PM20D1
Hatoum et al., 2023	36150907	Executive functions	GWAS	UKB	427037	rs10495508	SOX11
Hatoum et al., 2023	36150907	Executive functions	GWAS	UKB	427037	rs149479706;rs73395314;rs149479706:rs73395314	HIST1H4F
Hatoum et al., 2023	36150907	Executive functions	GWAS	UKB	427037	rs112096788	SMYD4
Hatoum et al., 2023	36150907	Executive functions	GWAS	UKB	427037	rs112096788	RPA1
Hatoum et al., 2023	36150907	Executive functions	GWAS	UKB	427037	rs11583896	GATAD2B
Hatoum et al., 2023	36150907	Executive functions	GWAS	UKB	427037	rs2050686	TMTC4
Hatoum et al., 2023	36150907	Executive functions	GWAS	UKB	427037	rs159428	C20orf112
Hatoum et al., 2023	36150907	Executive functions	GWAS	UKB	427037	rs11759522	SLC22A23
Hatoum et al., 2023	36150907	Executive functions	GWAS	UKB	427037	rs4934169;rs11202815;rs6585994;rs11202929;rs4933397;rs9633740;rs873257	DYDC2
Hatoum et al., 2023	36150907	Executive functions	GWAS	UKB	427037	rs7981260	NUDT15
Hatoum et al., 2023	36150907	Executive functions	GWAS	UKB	427037	rs159428	TM9SF4
Hatoum et al., 2023	36150907	Executive functions	GWAS	UKB	427037	rs3021083	NFAM1
Hatoum et al., 2023	36150907	Executive functions	GWAS	UKB	427037	rs62150702;rs12997018	STAMBP
Hatoum et al., 2023	36150907	Executive functions	GWAS	UKB	427037	rs6699558	COL16A1
Hatoum et al., 2023	36150907	Executive functions	GWAS	UKB	427037	rs9832922	EPHB1
Hatoum et al., 2023	36150907	Executive functions	GWAS	UKB	427037	rs11202815;rs6585994;rs4934169;rs11202929	DYDC1
Hatoum et al., 2023	36150907	Executive functions	GWAS	UKB	427037	rs2238057	CACNA1C
Hatoum et al., 2023	36150907	Executive functions	GWAS	UKB	427037	rs159428	PLAGL2
Hatoum et al., 2023	36150907	Executive functions	GWAS	UKB	427037	rs159428	POFUT1
Hatoum et al., 2023	36150907	Executive functions	GWAS	UKB	427037	rs55662945	SEMA3F
Hatoum et al., 2023	36150907	Executive functions	GWAS	UKB	427037	rs7725131	SSBP2
Hatoum et al., 2023	36150907	Executive functions	GWAS	UKB	427037	rs159428	ASXL1
Hatoum et al., 2023	36150907	Executive functions	GWAS	UKB	427037	rs55662945;rs13086611	RBM6
Hatoum et al., 2023	36150907	Executive functions	GWAS	UKB	427037	rs140163521	XPO5
Hatoum et al., 2023	36150907	Executive functions	GWAS	UKB	427037	rs55662945;rs7641050;rs9883813	USP19
Hatoum et al., 2023	36150907	Executive functions	GWAS	UKB	427037	rs7641050;rs9883813;rs55662945	LAMB2
Hatoum et al., 2023	36150907	Executive functions	GWAS	UKB	427037	rs34885420	EGR1
Hatoum et al., 2023	36150907	Executive functions	GWAS	UKB	427037	rs73395314	ZNF184
Hatoum et al., 2023	36150907	Executive functions	GWAS	UKB	427037	rs988068	PHF20L1
Hatoum et al., 2023	36150907	Executive functions	GWAS	UKB	427037	rs309171;rs4954387	UBXN4
Hatoum et al., 2023	36150907	Executive functions	GWAS	UKB	427037	rs9827246	LSAMP
Hatoum et al., 2023	36150907	Executive functions	GWAS	UKB	427037	rs11583896	CRTC2
Hatoum et al., 2023	36150907	Executive functions	GWAS	UKB	427037	rs11583896	SLC39A1
Hatoum et al., 2023	36150907	Executive functions	GWAS	UKB	427037	rs11583896	CREB3L4
Bralten et al., 2021	34054130	Sociability	GWAS	UKB	342461	rs10180695	AC007682.1
Bralten et al., 2021	34054130	Sociability	GWAS	UKB	342461	rs202220108	MBD5
Bralten et al., 2021	34054130	Sociability	GWAS	UKB	342461	rs57601252	NR4A2
Bralten et al., 2021	34054130	Sociability	GWAS	UKB	342461	rs4266214	RP11-359D24.1
Bralten et al., 2021	34054130	Sociability	GWAS	UKB	342461	rs62365541	CTD-2335O3.3
Bralten et al., 2021	34054130	Sociability	GWAS	UKB	342461	rs4075651	RP11-120B7.1
Bralten et al., 2021	34054130	Sociability	GWAS	UKB	342461	rs10456089	RP11-456H18.1
Bralten et al., 2021	34054130	Sociability	GWAS	UKB	342461	rs4839780	SIM1
Bralten et al., 2021	34054130	Sociability	GWAS	UKB	342461	rs34979551	SIM1
Bralten et al., 2021	34054130	Sociability	GWAS	UKB	342461	rs6976111	CTTNBP2
Bralten et al., 2021	34054130	Sociability	GWAS	UKB	342461	rs3793577	ELAVL2
Bralten et al., 2021	34054130	Sociability	GWAS	UKB	342461	rs10761244	PHF2
Bralten et al., 2021	34054130	Sociability	GWAS	UKB	342461	rs71507562	TUBB4BP6
Bralten et al., 2021	34054130	Sociability	GWAS	UKB	342461	rs34588274	ARNTL
Bralten et al., 2021	34054130	Sociability	GWAS	UKB	342461	rs527528	ZDHHC5
Bralten et al., 2021	34054130	Sociability	GWAS	UKB	342461	rs4245154	DRD2
Bralten et al., 2021	34054130	Sociability	GWAS	UKB	342461	rs3742021	MYO1H
Bralten et al., 2021	34054130	Sociability	GWAS	UKB	342461	rs3784060	SIPA1L1
Bralten et al., 2021	34054130	Sociability	GWAS	UKB	342461	rs2216270	RP11-389J22.3
Barkhuizen et al., 2020	32152294	Psychotic experience	GWAS	UKB	116.787–117.794	rs4908317;rs17403033:rs4908317	LPPR5
Barkhuizen et al., 2020	32152294	Psychotic experience	GWAS	UKB	116.787–117.794	rs4908317;rs17403033:rs4908317:rs17403033	SNX7
Barkhuizen et al., 2020	32152294	Psychotic experience	GWAS	UKB	116.787–117.794	rs141697263	TNFSF4
Barkhuizen et al., 2020	32152294	Psychotic experience	GWAS	UKB	116.787–117.794	rs11099877	ARFIP1
Barkhuizen et al., 2020	32152294	Psychotic experience	GWAS	UKB	116.787–117.794	rs11099877	TIGD4
Barkhuizen et al., 2020	32152294	Psychotic experience	GWAS	UKB	116.787–117.794	rs73144807	CLDND1
Barkhuizen et al., 2020	32152294	Psychotic experience	GWAS	UKB	116.787–117.794	rs73144807	CRYBG3
Barkhuizen et al., 2020	32152294	Psychotic experience	GWAS	UKB	116.787–117.794	rs73144807	DCBLD2
Barkhuizen et al., 2020	32152294	Psychotic experience	GWAS	UKB	116.787–117.794	rs73144807	GPR15
Barkhuizen et al., 2020	32152294	Psychotic experience	GWAS	UKB	116.787–117.794	rs6118730	PAK7
Barkhuizen et al., 2020	32152294	Psychotic experience	GWAS	UKB	116.787–117.794	rs4766567	FAM216A
Barkhuizen et al., 2020	32152294	Psychotic experience	GWAS	UKB	116.787–117.794	rs4766567	GPN3
Barkhuizen et al., 2020	32152294	Psychotic experience	GWAS	UKB	116.787–117.794	rs4766567	PPP1CC
Barkhuizen et al., 2020	32152294	Psychotic experience	GWAS	UKB	116.787–117.794	rs34885185;rs12573347;rs12573347:rs34885185	VCL
Barkhuizen et al., 2020	32152294	Psychotic experience	GWAS	UKB	116.787–117.794	rs117143865	ADAMTS10
Barkhuizen et al., 2020	32152294	Psychotic experience	GWAS	UKB	116.787–117.794	rs1567541	RBPJ
Barkhuizen et al., 2020	32152294	Psychotic experience	GWAS	UKB	116.787–117.794	rs77901172	LHX2
Barkhuizen et al., 2020	32152294	Psychotic experience	GWAS	UKB	116.787–117.794	rs77901172	NEK6
Barkhuizen et al., 2020	32152294	Psychotic experience	GWAS	UKB	116.787–117.794	rs4376010	ABHD5
Barkhuizen et al., 2020	32152294	Psychotic experience	GWAS	UKB	116.787–117.794	rs4376010	ANO10
Barkhuizen et al., 2020	32152294	Psychotic experience	GWAS	UKB	116.787–117.794	rs4376010	SNRK
Barkhuizen et al., 2020	32152294	Psychotic experience	GWAS	UKB	116.787–117.794	rs4376010	ZNF197
Barkhuizen et al., 2020	32152294	Psychotic experience	GWAS	UKB	116.787–117.794	rs4376010	ZNF660
Barkhuizen et al., 2020	32152294	Psychotic experience	GWAS	UKB	116.787–117.794	rs181868327	HABP4
Barkhuizen et al., 2020	32152294	Psychotic experience	GWAS	UKB	116.787–117.794	rs34885185;rs12573347;rs12573347:rs34885185	ADK
Barkhuizen et al., 2020	32152294	Psychotic experience	GWAS	UKB	116.787–117.794	rs34885185;rs12573347;rs12573347:rs34885185	AP3M1
Barkhuizen et al., 2020	32152294	Psychotic experience	GWAS	UKB	116.787–117.794	rs12573347:rs34885185	SAMD8
Barkhuizen et al., 2020	32152294	Psychotic experience	GWAS	UKB	116.787–117.794	rs12573347:rs34885185	VDAC2
Barkhuizen et al., 2020	32152294	Psychotic experience	GWAS	UKB	116.787–117.794	rs12573347:rs34885185	CHCHD1
Barkhuizen et al., 2020	32152294	Psychotic experience	GWAS	UKB	116.787–117.794	rs12573347:rs34885185	COMTD1
Barkhuizen et al., 2020	32152294	Psychotic experience	GWAS	UKB	116.787–117.794	rs12573347:rs34885185	ZSWIM8
Barkhuizen et al., 2020	32152294	Psychotic experience	GWAS	UKB	116.787–117.794	rs118023027	C14orf23
Barkhuizen et al., 2020	32152294	Psychotic experience	GWAS	UKB	116.787–117.794	rs118023027	FOXG1
Barkhuizen et al., 2020	32152294	Psychotic experience	GWAS	UKB	116.787–117.794	rs301506	AMACR
Barkhuizen et al., 2020	32152294	Psychotic experience	GWAS	UKB	116.787–117.794	rs16902775	NADK2
Barkhuizen et al., 2020	32152294	Psychotic experience	GWAS	UKB	116.787–117.794	rs301506	C1QTNF3
Barkhuizen et al., 2020	32152294	Psychotic experience	GWAS	UKB	116.787–117.794	rs301506	RP11-1084J3.4
Barkhuizen et al., 2020	32152294	Psychotic experience	GWAS	UKB	116.787–117.794	rs34885185:rs12573347	DUPD1
Barkhuizen et al., 2020	32152294	Psychotic experience	GWAS	UKB	116.787–117.794	rs34885185:rs12573347	KAT6B
Barkhuizen et al., 2020	32152294	Psychotic experience	GWAS	UKB	116.787–117.794	rs34885185:rs12573347	SEC24C
Barkhuizen et al., 2020	32152294	Psychotic experience	GWAS	UKB	116.787–117.794	rs301506	RAI14
Barkhuizen et al., 2020	32152294	Psychotic experience	GWAS	UKB	116.787–117.794	rs301506	RXFP3
Barkhuizen et al., 2020	32152294	Psychotic experience	GWAS	UKB	116.787–117.794	rs141054838	AC005779.2
Barkhuizen et al., 2020	32152294	Psychotic experience	GWAS	UKB	116.787–117.794	rs141054838	BLOC1S3
Barkhuizen et al., 2020	32152294	Psychotic experience	GWAS	UKB	116.787–117.794	rs141054838	CLASRP
Barkhuizen et al., 2020	32152294	Psychotic experience	GWAS	UKB	116.787–117.794	rs141054838	TRAPPC6A
Barkhuizen et al., 2020	32152294	Psychotic experience	GWAS	UKB	116.787–117.794	rs35378300	ZNF730
Barkhuizen et al., 2020	32152294	Psychotic experience	GWAS	UKB	116.787–117.794	rs58702053	FZD8
Barkhuizen et al., 2020	32152294	Psychotic experience	GWAS	UKB	116.787–117.794	rs150957182	CACNG6
Barkhuizen et al., 2020	32152294	Psychotic experience	GWAS	UKB	116.787–117.794	rs150957182	LENG1
Barkhuizen et al., 2020	32152294	Psychotic experience	GWAS	UKB	116.787–117.794	rs150957182	MYADM
Barkhuizen et al., 2020	32152294	Psychotic experience	GWAS	UKB	116.787–117.794	rs56097929	IPCEF1
Barkhuizen et al., 2020	32152294	Psychotic experience	GWAS	UKB	116.787–117.794	rs28411867:rs9652538	ADAMTS17
Barkhuizen et al., 2020	32152294	Psychotic experience	GWAS	UKB	116.787–117.794	rs2057499	STXBP6
Barkhuizen et al., 2020	32152294	Psychotic experience	GWAS	UKB	116.787–117.794	rs10503435	DLC1
Barkhuizen et al., 2020	32152294	Psychotic experience	GWAS	UKB	116.787–117.794	rs10503435	KIAA1456
Barkhuizen et al., 2020	32152294	Psychotic experience	GWAS	UKB	116.787–117.794	rs35316515	MON2
Barkhuizen et al., 2020	32152294	Psychotic experience	GWAS	UKB	116.787–117.794	rs61879337	PRMT3
Barkhuizen et al., 2020	32152294	Psychotic experience	GWAS	UKB	116.787–117.794	rs61879337	SLC6A5
Barkhuizen et al., 2020	32152294	Psychotic experience	GWAS	UKB	116.787–117.794	rs140225802	GABRA1
Barkhuizen et al., 2020	32152294	Psychotic experience	GWAS	UKB	116.787–117.794	rs140225802	GABRG2
Barkhuizen et al., 2020	32152294	Psychotic experience	GWAS	UKB	116.787–117.794	rs140225802	HMMR
Barkhuizen et al., 2020	32152294	Psychotic experience	GWAS	UKB	116.787–117.794	rs140225802	MAT2B
Barkhuizen et al., 2020	32152294	Psychotic experience	GWAS	UKB	116.787–117.794	rs140225802	NUDCD2
Barkhuizen et al., 2020	32152294	Psychotic experience	GWAS	UKB	116.787–117.794	rs59421548	ERMARD
Barkhuizen et al., 2020	32152294	Psychotic experience	GWAS	UKB	116.787–117.794	rs59421548	TCTE3
Barkhuizen et al., 2020	32152294	Psychotic experience	GWAS	UKB	116.787–117.794	rs10994279	ANK3
Barkhuizen et al., 2020	32152294	Psychotic experience	GWAS	UKB	116.787–117.794	rs112596311	MRPL28
Barkhuizen et al., 2020	32152294	Psychotic experience	GWAS	UKB	116.787–117.794	rs111560423	INHBA
Barkhuizen et al., 2020	32152294	Psychotic experience	GWAS	UKB	116.787–117.794	rs2641526	NR4A1
Barkhuizen et al., 2020	32152294	Psychotic experience	GWAS	UKB	116.787–117.794	rs4766567	CUX2
Barkhuizen et al., 2020	32152294	Psychotic experience	GWAS	UKB	116.787–117.794	rs4766567	TMEM116
Barkhuizen et al., 2020	32152294	Psychotic experience	GWAS	UKB	116.787–117.794	rs35378300	ZNF492
Barkhuizen et al., 2020	32152294	Psychotic experience	GWAS	UKB	116.787–117.794	rs113760919	CNTNAP5
Barkhuizen et al., 2020	32152294	Psychotic experience	GWAS	UKB	116.787–117.794	rs10102944	TSNARE1
Barkhuizen et al., 2020	32152294	Psychotic experience	GWAS	UKB	116.787–117.794	rs16829967	LYPD6
Barkhuizen et al., 2020	32152294	Psychotic experience	GWAS	UKB	116.787–117.794	rs16829967	MMADHC
Barkhuizen et al., 2020	32152294	Psychotic experience	GWAS	UKB	116.787–117.794	rs16829967	RIF1
Barkhuizen et al., 2020	32152294	Psychotic experience	GWAS	UKB	116.787–117.794	rs35316515	C12orf61
Barkhuizen et al., 2020	32152294	Psychotic experience	GWAS	UKB	116.787–117.794	rs35316515	PPM1H
Barkhuizen et al., 2020	32152294	Psychotic experience	GWAS	UKB	116.787–117.794	rs2641526	PFDN5
Barkhuizen et al., 2020	32152294	Psychotic experience	GWAS	UKB	116.787–117.794	rs112596311	CAPN15
Barkhuizen et al., 2020	32152294	Psychotic experience	GWAS	UKB	116.787–117.794	rs112596311	FAM195A
Barkhuizen et al., 2020	32152294	Psychotic experience	GWAS	UKB	116.787–117.794	rs112596311	ITFG3
Barkhuizen et al., 2020	32152294	Psychotic experience	GWAS	UKB	116.787–117.794	rs112596311	LUC7L
Barkhuizen et al., 2020	32152294	Psychotic experience	GWAS	UKB	116.787–117.794	rs112596311	METRN
Barkhuizen et al., 2020	32152294	Psychotic experience	GWAS	UKB	116.787–117.794	rs112596311	NDUFB10
Barkhuizen et al., 2020	32152294	Psychotic experience	GWAS	UKB	116.787–117.794	rs112596311	PDIA2
Barkhuizen et al., 2020	32152294	Psychotic experience	GWAS	UKB	116.787–117.794	rs112596311	RAB11FIP3
Barkhuizen et al., 2020	32152294	Psychotic experience	GWAS	UKB	116.787–117.794	rs112596311	RNF151
Barkhuizen et al., 2020	32152294	Psychotic experience	GWAS	UKB	116.787–117.794	rs112596311	RPS2
Barkhuizen et al., 2020	32152294	Psychotic experience	GWAS	UKB	116.787–117.794	rs112596311	WDR90
Barkhuizen et al., 2020	32152294	Psychotic experience	GWAS	UKB	116.787–117.794	rs112596311	WFIKKN1
Barkhuizen et al., 2020	32152294	Psychotic experience	GWAS	UKB	116.787–117.794	rs78441035	C3orf17
Barkhuizen et al., 2020	32152294	Psychotic experience	GWAS	UKB	116.787–117.794	rs78441035	GTPBP8
Barkhuizen et al., 2020	32152294	Psychotic experience	GWAS	UKB	116.787–117.794	rs34186519	SNX7
Barkhuizen et al., 2020	32152294	Psychotic experience	GWAS	UKB	116.787–117.794	rs34186519	LPPR5
Barkhuizen et al., 2020	32152294	Psychotic experience	GWAS	UKB	116.787–117.794	rs76075275	AL590483.1
Barkhuizen et al., 2020	32152294	Psychotic experience	GWAS	UKB	116.787–117.794	rs76075275	ZBTB18
Barkhuizen et al., 2020	32152294	Psychotic experience	GWAS	UKB	116.787–117.794	rs10030500	GRID2
Barkhuizen et al., 2020	32152294	Psychotic experience	GWAS	UKB	116.787–117.794	rs78362422	C3orf72
Barkhuizen et al., 2020	32152294	Psychotic experience	GWAS	UKB	116.787–117.794	rs78362422	FOXL2
Barkhuizen et al., 2020	32152294	Psychotic experience	GWAS	UKB	116.787–117.794	rs16887056	SMOC2
Barkhuizen et al., 2020	32152294	Psychotic experience	GWAS	UKB	116.787–117.794	rs2641526	C12orf44
Ward et al., 2019	31797917	Anhedonia	GWAS	UKB	375275	rs113740933	RGS1, RGS2
Ward et al., 2019	31797917	Anhedonia	GWAS	UKB	375275	3:136268500_GT_G	EPHB1
Ward et al., 2019	31797917	Anhedonia	GWAS	UKB	375275	6:27731402_ATTTTTTTTTTTTTTTTTTTTTTTTTTTT_A	/
Ward et al., 2019	31797917	Anhedonia	GWAS	UKB	375275	rs756739942	CTNNA3
Ward et al., 2019	31797917	Anhedonia	GWAS	UKB	375275	11:88755654_CA_C	GRM5, DISC1FP1
Ward et al., 2019	31797917	Anhedonia	GWAS	UKB	375275	11:112900785_TA_T	NCAM1, DRD2
Ward et al., 2019	31797917	Anhedonia	GWAS	UKB	375275	rs35416728	/
Ward et al., 2019	31797917	Anhedonia	GWAS	UKB	375275	14:30164440_CA_C	PRKD1
Ward et al., 2019	31797917	Anhedonia	GWAS	UKB	375275	rs1965449	SLC8A3
Ward et al., 2019	31797917	Anhedonia	GWAS	UKB	375275	15:75180130_CT_C	ISLR2, NRG4
Ward et al., 2019	31797917	Anhedonia	GWAS	UKB	375275	rs72923287	DCC
Nagel et al., 2018	29942085	Neuroticism	Meta-analysis of GWAS	UKB, 23andMe, GPC1	449484	rs10048736	ARHGAP15
Nagel et al., 2018	29942085	Neuroticism	Meta-analysis of GWAS	UKB, 23andMe, GPC1	449484	rs10048736	RP11-570L15.2
Nagel et al., 2018	29942085	Neuroticism	Meta-analysis of GWAS	UKB, 23andMe, GPC1	449484	rs10119773	ELAVL2
Nagel et al., 2018	29942085	Neuroticism	Meta-analysis of GWAS	UKB, 23andMe, GPC1	449484	rs1018154	/
Nagel et al., 2018	29942085	Neuroticism	Meta-analysis of GWAS	UKB, 23andMe, GPC1	449484	rs10188070	VRK2
Nagel et al., 2018	29942085	Neuroticism	Meta-analysis of GWAS	UKB, 23andMe, GPC1	449484	rs10274968	VPS41
Nagel et al., 2018	29942085	Neuroticism	Meta-analysis of GWAS	UKB, 23andMe, GPC1	449484	rs10460051	/
Nagel et al., 2018	29942085	Neuroticism	Meta-analysis of GWAS	UKB, 23andMe, GPC1	449484	rs10497655	/
Nagel et al., 2018	29942085	Neuroticism	Meta-analysis of GWAS	UKB, 23andMe, GPC1	449484	rs10790767	CNTN5
Nagel et al., 2018	29942085	Neuroticism	Meta-analysis of GWAS	UKB, 23andMe, GPC1	449484	rs10811883	/
Nagel et al., 2018	29942085	Neuroticism	Meta-analysis of GWAS	UKB, 23andMe, GPC1	449484	rs10830220	/
Nagel et al., 2018	29942085	Neuroticism	Meta-analysis of GWAS	UKB, 23andMe, GPC1	449484	rs10835565	CTD-3138F19.1
Nagel et al., 2018	29942085	Neuroticism	Meta-analysis of GWAS	UKB, 23andMe, GPC1	449484	rs10896636	ZDHHC5
Nagel et al., 2018	29942085	Neuroticism	Meta-analysis of GWAS	UKB, 23andMe, GPC1	449484	rs11082011	CELF4
Nagel et al., 2018	29942085	Neuroticism	Meta-analysis of GWAS	UKB, 23andMe, GPC1	449484	rs11127043	CHMP3
Nagel et al., 2018	29942085	Neuroticism	Meta-analysis of GWAS	UKB, 23andMe, GPC1	449484	rs11127043	RNF103-CHMP3
Nagel et al., 2018	29942085	Neuroticism	Meta-analysis of GWAS	UKB, 23andMe, GPC1	449484	rs11184994	/
Nagel et al., 2018	29942085	Neuroticism	Meta-analysis of GWAS	UKB, 23andMe, GPC1	449484	rs11240962	/
Nagel et al., 2018	29942085	Neuroticism	Meta-analysis of GWAS	UKB, 23andMe, GPC1	449484	rs11256385	/
Nagel et al., 2018	29942085	Neuroticism	Meta-analysis of GWAS	UKB, 23andMe, GPC1	449484	rs11509880	TMEM106B
Nagel et al., 2018	29942085	Neuroticism	Meta-analysis of GWAS	UKB, 23andMe, GPC1	449484	rs11576073	/
Nagel et al., 2018	29942085	Neuroticism	Meta-analysis of GWAS	UKB, 23andMe, GPC1	449484	rs11605020	/
Nagel et al., 2018	29942085	Neuroticism	Meta-analysis of GWAS	UKB, 23andMe, GPC1	449484	rs11608355	MYO1H
Nagel et al., 2018	29942085	Neuroticism	Meta-analysis of GWAS	UKB, 23andMe, GPC1	449484	rs11627348	OTX2-AS1
Nagel et al., 2018	29942085	Neuroticism	Meta-analysis of GWAS	UKB, 23andMe, GPC1	449484	rs11627348	RP11-1085N6.5
Nagel et al., 2018	29942085	Neuroticism	Meta-analysis of GWAS	UKB, 23andMe, GPC1	449484	rs11740246	COMMD10
Nagel et al., 2018	29942085	Neuroticism	Meta-analysis of GWAS	UKB, 23andMe, GPC1	449484	rs11766965	/
Nagel et al., 2018	29942085	Neuroticism	Meta-analysis of GWAS	UKB, 23andMe, GPC1	449484	rs11852334	/
Nagel et al., 2018	29942085	Neuroticism	Meta-analysis of GWAS	UKB, 23andMe, GPC1	449484	rs11875397	/
Nagel et al., 2018	29942085	Neuroticism	Meta-analysis of GWAS	UKB, 23andMe, GPC1	449484	rs12137398	CAMTA1
Nagel et al., 2018	29942085	Neuroticism	Meta-analysis of GWAS	UKB, 23andMe, GPC1	449484	rs1226574	/
Nagel et al., 2018	29942085	Neuroticism	Meta-analysis of GWAS	UKB, 23andMe, GPC1	449484	rs12283653	/
Nagel et al., 2018	29942085	Neuroticism	Meta-analysis of GWAS	UKB, 23andMe, GPC1	449484	rs12344656	LINGO2
Nagel et al., 2018	29942085	Neuroticism	Meta-analysis of GWAS	UKB, 23andMe, GPC1	449484	rs12426113	/
Nagel et al., 2018	29942085	Neuroticism	Meta-analysis of GWAS	UKB, 23andMe, GPC1	449484	rs12442330	SEMA6D
Nagel et al., 2018	29942085	Neuroticism	Meta-analysis of GWAS	UKB, 23andMe, GPC1	449484	rs12747763	AGBL4
Nagel et al., 2018	29942085	Neuroticism	Meta-analysis of GWAS	UKB, 23andMe, GPC1	449484	rs1275411	DCAF5
Nagel et al., 2018	29942085	Neuroticism	Meta-analysis of GWAS	UKB, 23andMe, GPC1	449484	rs12898855	SEMA6D
Nagel et al., 2018	29942085	Neuroticism	Meta-analysis of GWAS	UKB, 23andMe, GPC1	449484	rs12926477	SHISA9
Nagel et al., 2018	29942085	Neuroticism	Meta-analysis of GWAS	UKB, 23andMe, GPC1	449484	rs12938775	PAFAH1B1
Nagel et al., 2018	29942085	Neuroticism	Meta-analysis of GWAS	UKB, 23andMe, GPC1	449484	rs12958048	TCF4
Nagel et al., 2018	29942085	Neuroticism	Meta-analysis of GWAS	UKB, 23andMe, GPC1	449484	rs13168838	/
Nagel et al., 2018	29942085	Neuroticism	Meta-analysis of GWAS	UKB, 23andMe, GPC1	449484	rs13262595	TSNARE1
Nagel et al., 2018	29942085	Neuroticism	Meta-analysis of GWAS	UKB, 23andMe, GPC1	449484	rs138218528	ERBB4
Nagel et al., 2018	29942085	Neuroticism	Meta-analysis of GWAS	UKB, 23andMe, GPC1	449484	rs1424144	/
Nagel et al., 2018	29942085	Neuroticism	Meta-analysis of GWAS	UKB, 23andMe, GPC1	449484	rs1501673	LINC00461
Nagel et al., 2018	29942085	Neuroticism	Meta-analysis of GWAS	UKB, 23andMe, GPC1	449484	rs1542212	ARPP21
Nagel et al., 2018	29942085	Neuroticism	Meta-analysis of GWAS	UKB, 23andMe, GPC1	449484	rs1595693	LINC00616
Nagel et al., 2018	29942085	Neuroticism	Meta-analysis of GWAS	UKB, 23andMe, GPC1	449484	rs1595693	SLC7A11-AS1
Nagel et al., 2018	29942085	Neuroticism	Meta-analysis of GWAS	UKB, 23andMe, GPC1	449484	rs167915	IGSF9B
Nagel et al., 2018	29942085	Neuroticism	Meta-analysis of GWAS	UKB, 23andMe, GPC1	449484	rs17096778	SLC44A5
Nagel et al., 2018	29942085	Neuroticism	Meta-analysis of GWAS	UKB, 23andMe, GPC1	449484	rs17432675	LMOD1
Nagel et al., 2018	29942085	Neuroticism	Meta-analysis of GWAS	UKB, 23andMe, GPC1	449484	rs17502858	ENAH
Nagel et al., 2018	29942085	Neuroticism	Meta-analysis of GWAS	UKB, 23andMe, GPC1	449484	rs17611770	GPM6A
Nagel et al., 2018	29942085	Neuroticism	Meta-analysis of GWAS	UKB, 23andMe, GPC1	449484	rs1778377	/
Nagel et al., 2018	29942085	Neuroticism	Meta-analysis of GWAS	UKB, 23andMe, GPC1	449484	rs1806153	RCN1
Nagel et al., 2018	29942085	Neuroticism	Meta-analysis of GWAS	UKB, 23andMe, GPC1	449484	rs1861777	/
Nagel et al., 2018	29942085	Neuroticism	Meta-analysis of GWAS	UKB, 23andMe, GPC1	449484	rs1892350	/
Nagel et al., 2018	29942085	Neuroticism	Meta-analysis of GWAS	UKB, 23andMe, GPC1	449484	rs1980119	PRKCA
Nagel et al., 2018	29942085	Neuroticism	Meta-analysis of GWAS	UKB, 23andMe, GPC1	449484	rs199933	CACNA1E
Nagel et al., 2018	29942085	Neuroticism	Meta-analysis of GWAS	UKB, 23andMe, GPC1	449484	rs200965	/
Nagel et al., 2018	29942085	Neuroticism	Meta-analysis of GWAS	UKB, 23andMe, GPC1	449484	rs2015971	STAB1
Nagel et al., 2018	29942085	Neuroticism	Meta-analysis of GWAS	UKB, 23andMe, GPC1	449484	rs2031595	/
Nagel et al., 2018	29942085	Neuroticism	Meta-analysis of GWAS	UKB, 23andMe, GPC1	449484	rs2042395	ZCCHC14
Nagel et al., 2018	29942085	Neuroticism	Meta-analysis of GWAS	UKB, 23andMe, GPC1	449484	rs2042555	/
Nagel et al., 2018	29942085	Neuroticism	Meta-analysis of GWAS	UKB, 23andMe, GPC1	449484	rs2056477	MAD1L1
Nagel et al., 2018	29942085	Neuroticism	Meta-analysis of GWAS	UKB, 23andMe, GPC1	449484	rs2071303	HFE
Nagel et al., 2018	29942085	Neuroticism	Meta-analysis of GWAS	UKB, 23andMe, GPC1	449484	rs2093623	/
Nagel et al., 2018	29942085	Neuroticism	Meta-analysis of GWAS	UKB, 23andMe, GPC1	449484	rs2380937	GLIS3
Nagel et al., 2018	29942085	Neuroticism	Meta-analysis of GWAS	UKB, 23andMe, GPC1	449484	rs240769	ASCC3
Nagel et al., 2018	29942085	Neuroticism	Meta-analysis of GWAS	UKB, 23andMe, GPC1	449484	rs2407746	/
Nagel et al., 2018	29942085	Neuroticism	Meta-analysis of GWAS	UKB, 23andMe, GPC1	449484	rs2425752	NCOA5
Nagel et al., 2018	29942085	Neuroticism	Meta-analysis of GWAS	UKB, 23andMe, GPC1	449484	rs2488401	DENND1B
Nagel et al., 2018	29942085	Neuroticism	Meta-analysis of GWAS	UKB, 23andMe, GPC1	449484	rs2503775	RP11-436D23.1
Nagel et al., 2018	29942085	Neuroticism	Meta-analysis of GWAS	UKB, 23andMe, GPC1	449484	rs2737219	TRPS1
Nagel et al., 2018	29942085	Neuroticism	Meta-analysis of GWAS	UKB, 23andMe, GPC1	449484	rs274632	/
Nagel et al., 2018	29942085	Neuroticism	Meta-analysis of GWAS	UKB, 23andMe, GPC1	449484	rs28639817	SGCZ
Nagel et al., 2018	29942085	Neuroticism	Meta-analysis of GWAS	UKB, 23andMe, GPC1	449484	rs28986304	GABBR1
Nagel et al., 2018	29942085	Neuroticism	Meta-analysis of GWAS	UKB, 23andMe, GPC1	449484	rs2921036	/
Nagel et al., 2018	29942085	Neuroticism	Meta-analysis of GWAS	UKB, 23andMe, GPC1	449484	rs297343	SOX6
Nagel et al., 2018	29942085	Neuroticism	Meta-analysis of GWAS	UKB, 23andMe, GPC1	449484	rs3124426	/
Nagel et al., 2018	29942085	Neuroticism	Meta-analysis of GWAS	UKB, 23andMe, GPC1	449484	rs35048193	GRM8
Nagel et al., 2018	29942085	Neuroticism	Meta-analysis of GWAS	UKB, 23andMe, GPC1	449484	rs35763039	/
Nagel et al., 2018	29942085	Neuroticism	Meta-analysis of GWAS	UKB, 23andMe, GPC1	449484	rs35982947	MED24
Nagel et al., 2018	29942085	Neuroticism	Meta-analysis of GWAS	UKB, 23andMe, GPC1	449484	rs3740393	C10orf32-ASMT
Nagel et al., 2018	29942085	Neuroticism	Meta-analysis of GWAS	UKB, 23andMe, GPC1	449484	rs3740393	AS3MT
Nagel et al., 2018	29942085	Neuroticism	Meta-analysis of GWAS	UKB, 23andMe, GPC1	449484	rs3741475	NOS1
Nagel et al., 2018	29942085	Neuroticism	Meta-analysis of GWAS	UKB, 23andMe, GPC1	449484	rs3751855	ZNF646
Nagel et al., 2018	29942085	Neuroticism	Meta-analysis of GWAS	UKB, 23andMe, GPC1	449484	rs3783007	STK24
Nagel et al., 2018	29942085	Neuroticism	Meta-analysis of GWAS	UKB, 23andMe, GPC1	449484	rs3785232	RBFOX1
Nagel et al., 2018	29942085	Neuroticism	Meta-analysis of GWAS	UKB, 23andMe, GPC1	449484	rs3812479	DLGAP2
Nagel et al., 2018	29942085	Neuroticism	Meta-analysis of GWAS	UKB, 23andMe, GPC1	449484	rs4337088	RP11-114G22.1
Nagel et al., 2018	29942085	Neuroticism	Meta-analysis of GWAS	UKB, 23andMe, GPC1	449484	rs4360891	LINGO1
Nagel et al., 2018	29942085	Neuroticism	Meta-analysis of GWAS	UKB, 23andMe, GPC1	449484	rs4396680	/
Nagel et al., 2018	29942085	Neuroticism	Meta-analysis of GWAS	UKB, 23andMe, GPC1	449484	rs4444227	/
Nagel et al., 2018	29942085	Neuroticism	Meta-analysis of GWAS	UKB, 23andMe, GPC1	449484	rs4585149	/
Nagel et al., 2018	29942085	Neuroticism	Meta-analysis of GWAS	UKB, 23andMe, GPC1	449484	rs4632195	DCC
Nagel et al., 2018	29942085	Neuroticism	Meta-analysis of GWAS	UKB, 23andMe, GPC1	449484	rs4665244	ATAD2B
Nagel et al., 2018	29942085	Neuroticism	Meta-analysis of GWAS	UKB, 23andMe, GPC1	449484	rs4697241	KCNIP4
Nagel et al., 2018	29942085	Neuroticism	Meta-analysis of GWAS	UKB, 23andMe, GPC1	449484	rs4757136	/
Nagel et al., 2018	29942085	Neuroticism	Meta-analysis of GWAS	UKB, 23andMe, GPC1	449484	rs4868748	CTC-340A15.2
Nagel et al., 2018	29942085	Neuroticism	Meta-analysis of GWAS	UKB, 23andMe, GPC1	449484	rs529900	CBFA2T3
Nagel et al., 2018	29942085	Neuroticism	Meta-analysis of GWAS	UKB, 23andMe, GPC1	449484	rs56084168	BAIAP2
Nagel et al., 2018	29942085	Neuroticism	Meta-analysis of GWAS	UKB, 23andMe, GPC1	449484	rs57360718	/
Nagel et al., 2018	29942085	Neuroticism	Meta-analysis of GWAS	UKB, 23andMe, GPC1	449484	rs59382200	LSAMP
Nagel et al., 2018	29942085	Neuroticism	Meta-analysis of GWAS	UKB, 23andMe, GPC1	449484	rs60393230	/
Nagel et al., 2018	29942085	Neuroticism	Meta-analysis of GWAS	UKB, 23andMe, GPC1	449484	rs62212171	ITCH
Nagel et al., 2018	29942085	Neuroticism	Meta-analysis of GWAS	UKB, 23andMe, GPC1	449484	rs62550480	/
Nagel et al., 2018	29942085	Neuroticism	Meta-analysis of GWAS	UKB, 23andMe, GPC1	449484	rs6490177	TAOK3
Nagel et al., 2018	29942085	Neuroticism	Meta-analysis of GWAS	UKB, 23andMe, GPC1	449484	rs655836	STAG1
Nagel et al., 2018	29942085	Neuroticism	Meta-analysis of GWAS	UKB, 23andMe, GPC1	449484	rs6737187	NYAP2
Nagel et al., 2018	29942085	Neuroticism	Meta-analysis of GWAS	UKB, 23andMe, GPC1	449484	rs6776145	/
Nagel et al., 2018	29942085	Neuroticism	Meta-analysis of GWAS	UKB, 23andMe, GPC1	449484	rs6828271	SNCA
Nagel et al., 2018	29942085	Neuroticism	Meta-analysis of GWAS	UKB, 23andMe, GPC1	449484	rs6948810	SP4
Nagel et al., 2018	29942085	Neuroticism	Meta-analysis of GWAS	UKB, 23andMe, GPC1	449484	rs7025144	/
Nagel et al., 2018	29942085	Neuroticism	Meta-analysis of GWAS	UKB, 23andMe, GPC1	449484	rs7107356	/
Nagel et al., 2018	29942085	Neuroticism	Meta-analysis of GWAS	UKB, 23andMe, GPC1	449484	rs7111031	/
Nagel et al., 2018	29942085	Neuroticism	Meta-analysis of GWAS	UKB, 23andMe, GPC1	449484	rs7240682	RP11-795H16.3
Nagel et al., 2018	29942085	Neuroticism	Meta-analysis of GWAS	UKB, 23andMe, GPC1	449484	rs7536102	RABGAP1L
Nagel et al., 2018	29942085	Neuroticism	Meta-analysis of GWAS	UKB, 23andMe, GPC1	449484	rs75614054	PTCH1
Nagel et al., 2018	29942085	Neuroticism	Meta-analysis of GWAS	UKB, 23andMe, GPC1	449484	rs76288073	CYP7B1
Nagel et al., 2018	29942085	Neuroticism	Meta-analysis of GWAS	UKB, 23andMe, GPC1	449484	rs77804065	CRHR1
Nagel et al., 2018	29942085	Neuroticism	Meta-analysis of GWAS	UKB, 23andMe, GPC1	449484	rs77804065	RP11-105N13.4
Nagel et al., 2018	29942085	Neuroticism	Meta-analysis of GWAS	UKB, 23andMe, GPC1	449484	rs77804065	RP11-293E1.1
Nagel et al., 2018	29942085	Neuroticism	Meta-analysis of GWAS	UKB, 23andMe, GPC1	449484	rs78046549	FAM120A
Nagel et al., 2018	29942085	Neuroticism	Meta-analysis of GWAS	UKB, 23andMe, GPC1	449484	rs7818437	MSRA
Nagel et al., 2018	29942085	Neuroticism	Meta-analysis of GWAS	UKB, 23andMe, GPC1	449484	rs78720888	AC107218.3
Nagel et al., 2018	29942085	Neuroticism	Meta-analysis of GWAS	UKB, 23andMe, GPC1	449484	rs7999314	/
Nagel et al., 2018	29942085	Neuroticism	Meta-analysis of GWAS	UKB, 23andMe, GPC1	449484	rs8033552	RP11-219B17.1
Nagel et al., 2018	29942085	Neuroticism	Meta-analysis of GWAS	UKB, 23andMe, GPC1	449484	rs8033552	RORA
Nagel et al., 2018	29942085	Neuroticism	Meta-analysis of GWAS	UKB, 23andMe, GPC1	449484	rs836927	/
Nagel et al., 2018	29942085	Neuroticism	Meta-analysis of GWAS	UKB, 23andMe, GPC1	449484	rs860626	EMX2OS
Nagel et al., 2018	29942085	Neuroticism	Meta-analysis of GWAS	UKB, 23andMe, GPC1	449484	rs9291211	BEND4
Nagel et al., 2018	29942085	Neuroticism	Meta-analysis of GWAS	UKB, 23andMe, GPC1	449484	rs938496	/
Nagel et al., 2018	29942085	Neuroticism	Meta-analysis of GWAS	UKB, 23andMe, GPC1	449484	rs9516861	/
Nagel et al., 2018	29942085	Neuroticism	Meta-analysis of GWAS	UKB, 23andMe, GPC1	449484	rs9521987	ANKRD10
Nagel et al., 2018	29942085	Neuroticism	Meta-analysis of GWAS	UKB, 23andMe, GPC1	449484	rs9611519	L3MBTL2
Nagel et al., 2018	29942085	Neuroticism	Meta-analysis of GWAS	UKB, 23andMe, GPC1	449484	rs9611519	RP4-756G23.5
Nagel et al., 2018	29942085	Neuroticism	Meta-analysis of GWAS	UKB, 23andMe, GPC1	449484	rs9671386	AREL1
Nagel et al., 2018	29942085	Neuroticism	Meta-analysis of GWAS	UKB, 23andMe, GPC1	449484	rs9852417	RP11-543A18.1
Nagel et al., 2018	29942085	Neuroticism	Meta-analysis of GWAS	UKB, 23andMe, GPC1	449484	rs9867227	PLCL2
Nagel et al., 2018	29942085	Neuroticism	Meta-analysis of GWAS	UKB, 23andMe, GPC1	449484	rs9870448	CADM2
Nagel et al., 2018	29942085	Neuroticism	Meta-analysis of GWAS	UKB, 23andMe, GPC1	449484	rs9933638	TOX3
Nagel et al., 2018	29942085	Neuroticism	Meta-analysis of GWAS	UKB, 23andMe, GPC1	449484	rs9971907	SOX5
Nagel et al., 2018	29942085	Neuroticism	Meta-analysis of GWAS	UKB, 23andMe, GPC1	449484	rs9972151	SIPA1L1
CONVERGE consortium, 2015	26176920	Melancholia (severe MDD)	GWAS	CONVERGE	4509	rs76931017	DNAJC12
CONVERGE consortium, 2015	26176920	Melancholia (severe MDD)	GWAS	CONVERGE	4509	rs74719503	DNAJC12
CONVERGE consortium, 2015	26176920	Melancholia (severe MDD)	GWAS	CONVERGE	4509	rs78784886	DNAJC12
CONVERGE consortium, 2015	26176920	Melancholia (severe MDD)	GWAS	CONVERGE	4509	rs74642861	DNAJC12
CONVERGE consortium, 2015	26176920	Melancholia (severe MDD)	GWAS	CONVERGE	4509	rs12416174	DNAJC12
CONVERGE consortium, 2015	26176920	Melancholia (severe MDD)	GWAS	CONVERGE	4509	rs2273772	DNAJC12
CONVERGE consortium, 2015	26176920	Melancholia (severe MDD)	GWAS	CONVERGE	4509	rs79651769	/
CONVERGE consortium, 2015	26176920	Melancholia (severe MDD)	GWAS	CONVERGE	4509	rs77546299	/
CONVERGE consortium, 2015	26176920	Melancholia (severe MDD)	GWAS	CONVERGE	4509	rs75818614	RP11-57G10.8
CONVERGE consortium, 2015	26176920	Melancholia (severe MDD)	GWAS	CONVERGE	4509	rs80309727	/
CONVERGE consortium, 2015	26176920	Melancholia (severe MDD)	GWAS	CONVERGE	4509	rs12415454	/
CONVERGE consortium, 2015	26176920	Melancholia (severe MDD)	GWAS	CONVERGE	4509	rs12415800	/
CONVERGE consortium, 2015	26176920	Melancholia (severe MDD)	GWAS	CONVERGE	4509	rs79651647	/
CONVERGE consortium, 2015	26176920	Melancholia (severe MDD)	GWAS	CONVERGE	4509	rs12572973	/
CONVERGE consortium, 2015	26176920	Melancholia (severe MDD)	GWAS	CONVERGE	4509	rs76164521	/
CONVERGE consortium, 2015	26176920	Melancholia (severe MDD)	GWAS	CONVERGE	4509	rs145356089	/
CONVERGE consortium, 2015	26176920	Melancholia (severe MDD)	GWAS	CONVERGE	4509	rs12412886	/
CONVERGE consortium, 2015	26176920	Melancholia (severe MDD)	GWAS	CONVERGE	4509	rs75255354	/
CONVERGE consortium, 2015	26176920	Melancholia (severe MDD)	GWAS	CONVERGE	4509	rs12571880	SIRT1
CONVERGE consortium, 2015	26176920	Melancholia (severe MDD)	GWAS	CONVERGE	4509	rs79269275	SIRT1
CONVERGE consortium, 2015	26176920	Melancholia (severe MDD)	GWAS	CONVERGE	4509	rs35480510	SIRT1
CONVERGE consortium, 2015	26176920	Melancholia (severe MDD)	GWAS	CONVERGE	4509	rs34294800	SIRT1
CONVERGE consortium, 2015	26176920	Melancholia (severe MDD)	GWAS	CONVERGE	4509	rs12570807	SIRT1
CONVERGE consortium, 2015	26176920	Melancholia (severe MDD)	GWAS	CONVERGE	4509	rs33992752	SIRT1
CONVERGE consortium, 2015	26176920	Melancholia (severe MDD)	GWAS	CONVERGE	4509	rs35416150	SIRT1
CONVERGE consortium, 2015	26176920	Melancholia (severe MDD)	GWAS	CONVERGE	4509	rs16924945	SIRT1
CONVERGE consortium, 2015	26176920	Melancholia (severe MDD)	GWAS	CONVERGE	4509	rs74790878	SIRT1
CONVERGE consortium, 2015	26176920	Melancholia (severe MDD)	GWAS	CONVERGE	4509	rs4746720	SIRT1
CONVERGE consortium, 2015	26176920	Melancholia (severe MDD)	GWAS	CONVERGE	4509	rs79804696	HERC4

## Sheet: SupplementaryTable2_genelevel
Supplementary Table 2: suggestive (5e-6 < p <5e-4) association signals at gene level with the phenotypes of interest, with significant associations (p<5e-6) in bold.
Author, year	PMID	Phenotype/outcome	Type of study	Cohort	Sample size	Gene level analysis
Treatment Outcomes
Pain et al., 2022	35712048	AD remission	GWAS	GSRD, STAR*D, GENDEP, 7 others	5151	ONECUT2
Pain et al., 2022	35712048	AD remission	GWAS	GSRD, STAR*D, GENDEP, 7 others	5151	PLN
Pain et al., 2022	35712048	AD remission	GWAS	GSRD, STAR*D, GENDEP, 7 others	5151	RNF170
Pain et al., 2022	35712048	AD remission	GWAS	GSRD, STAR*D, GENDEP, 7 others	5151	STEAP3
Pain et al., 2022	35712048	AD remission	GWAS	GSRD, STAR*D, GENDEP, 7 others	5151	TMEM56
Pain et al., 2022	35712048	AD remission	GWAS	GSRD, STAR*D, GENDEP, 7 others	5151	TMEM56-RWDD3
Pain et al., 2022	35712048	AD remission	GWAS	GSRD, STAR*D, GENDEP, 7 others	5151	ETV4
Pain et al., 2022	35712048	AD remission	GWAS	GSRD, STAR*D, GENDEP, 7 others	5151	DHX8
Kang et al., 2020	32664413	AD remission	WES	MAKE BETTER - male	155	PRNP
Kang et al., 2020	32664413	AD remission	WES	MAKE BETTER - male	155	COMT
Kang et al., 2020	32664413	AD remission	WES	MAKE BETTER - male	155	BRPF3
Kang et al., 2020	32664413	AD remission	WES	MAKE BETTER - male	155	SLC25A40
Kang et al., 2020	32664413	AD remission	WES	MAKE BETTER - total	511	ST3GAL5
Kang et al., 2020	32664413	AD remission	WES	MAKE BETTER - male	511	CGREF1
Kang et al., 2020	32664413	AD remission	WES	MAKE BETTER - female	356	PPFIBP1
Kang et al., 2020	32664413	AD remission	WES	MAKE BETTER - female	356	LZTS3
Kang et al., 2020	32664413	AD remission	WES	MAKE BETTER - female	356	MAP1A
Kang et al., 2020	32664413	AD remission	WES	MAKE BETTER - female	356	MEPCE
Kang et al., 2020	32664413	AD remission	WES	MAKE BETTER - female	356	PFAS
Li et al., 2020	33106475	NDRI response	Meta-analysis of GWAS	23andMe AES, AESES	7483	ANKRD30A
Li et al., 2020	33106475	NDRI response	Meta-analysis of GWAS	23andMe AES, AESES	7483	CERS3
Li et al., 2020	33106475	NDRI response	Meta-analysis of GWAS	23andMe AES, AESES	7483	FBXO32
Li et al., 2020	33106475	NDRI response	GWAS	23andMe AES	3684	HIST1H2AA
Li et al., 2020	33106475	NDRI response	GWAS	23andMe AES	3684	HIST1H2BA
Li et al., 2020	33106475	NDRI response	GWAS	23andMe AES	3684	KLHL42
Li et al., 2020	33106475	NDRI response	GWAS	23andMe AES	3684	LAMA2
Li et al., 2020	33106475	NDRI response	GWAS	23andMe AES	3684	MANSC4
Li et al., 2020	33106475	NDRI response	GWAS	23andMe AES	3684	MRPS35
Li et al., 2020	33106475	NDRI response	GWAS	23andMe AES	3684	REP15
Li et al., 2020	33106475	NDRI response	Meta-analysis of GWAS	23andMe AES, AESES	7483	SHB
Li et al., 2020	33106475	NDRI response	GWAS	23andMe AES	3684	SLC17A4
Li et al., 2020	33106475	NDRI response	Meta-analysis of GWAS	23andMe AES, AESES	7483	SOX2
Li et al., 2020	33106475	NDRI response	GWAS	23andMe AES	3684	ZNRF4
Li et al., 2020	33106475	SNRI response	GWAS	23andMe AES	4005	CCR6
Li et al., 2020	33106475	SNRI response	GWAS	23andMe AES	4005	DET1
Li et al., 2020	33106475	SNRI response	Meta-analysis of GWAS	23andMe AES, AESES	7079	FCHSD2
Li et al., 2020	33106475	SNRI response	GWAS	23andMe AES	4005	FIBIN
Li et al., 2020	33106475	SNRI response	GWAS	23andMe AES	4005	FRRS1
Li et al., 2020	33106475	SNRI response	GWAS	23andMe AES	4005	HIF3A
Li et al., 2020	33106475	SNRI response	GWAS	23andMe AES	4005	HNRNPC
Li et al., 2020	33106475	SNRI response	GWAS	23andMe AES	4005	MTRNR2L9
Li et al., 2020	33106475	SNRI response	GWAS	23andMe AESES	4114	NANP
Li et al., 2020	33106475	SNRI response	GWAS	23andMe AESES	4114	NINL
Li et al., 2020	33106475	SNRI response	GWAS	23andMe AESES	4114	PARD3
Li et al., 2020	33106475	SNRI response	GWAS	23andMe AESES	4114	RPH3A
Li et al., 2020	33106475	SNRI response	GWAS	23andMe AES	4005	TLX1
Li et al., 2020	33106475	SNRI response	Meta-analysis of GWAS	23andMe AES, AESES	7079	TRIM25
Li et al., 2020	33106475	SNRI response	GWAS	23andMe AESES	4114	ZNF337
Li et al., 2020	33106475	SNRI response	GWAS	23andMe AES	4005	ADAMTS5
Li et al., 2020	33106475	SSRI response	GWAS	23andMe AES	12477	ADRB2
Li et al., 2020	33106475	SSRI response	Meta-analysis of GWAS	23andMe AES, AESES	19740	BCL2L1
Li et al., 2020	33106475	SSRI response	Meta-analysis of GWAS	23andMe AES, AESES	19740	LRRTM1
Li et al., 2020	33106475	SSRI response	Meta-analysis of GWAS	23andMe AES, AESES	19740	MYLK2
Li et al., 2020	33106475	SSRI response	GWAS	23andMe AES	12477	NOTCH3
Li et al., 2020	33106475	SSRI response	GWAS	23andMe AES	12477	SLC35F5
Li et al., 2020	33106475	SSRI response	Meta-analysis of GWAS	23andMe AES, AESES	19740	TPX2
Li et al., 2020	33106475	TRD	Meta-analysis of GWAS	23andMe AES, AESES	25506	FSCN2
Li et al., 2020	33106475	TRD	GWAS	23andMe AES	20382	LRRC53
Li et al., 2020	33106475	TRD	GWAS	23andMe AES	20382	NUP88
Li et al., 2020	33106475	TRD	Meta-analysis of GWAS	23andMe AES, AESES	25506	OR9A2
Li et al., 2020	33106475	TRD	GWAS	23andMe AES	20382	PDLIM2
Li et al., 2020	33106475	TRD	Meta-analysis of GWAS	23andMe AES, AESES	25506	PHF14
Li et al., 2020	33106475	TRD	GWAS	23andMe AES	20382	RABEP1
Li et al., 2020	33106475	TRD	GWAS	23andMe AES	20382	RPAIN
Li et al., 2020	33106475	TRD	Meta-analysis of GWAS	23andMe AES, AESES	25506	ZNF529
Li et al., 2020	33106475	TRD	GWAS	23andMe AES	20382	NCR3
Li et al., 2020	33106475	TRD	GWAS	23andMe AES	20382	LST1
Li et al., 2020	33106475	TRD	GWAS	23andMe AES	20382	LTB
Fabbri et al., 2019	30468137	TRD vs response	GWAS	GSRD	759	CNEP1R1
Fabbri et al., 2019	30468137	TRD vs response	GWAS	GSRD	759	COL12A1
Fabbri et al., 2019	30468137	TRD vs response	GWAS	GSRD	759	CXXC1
Fabbri et al., 2019	30468137	TRD vs response	GWAS	GSRD	759	ERAL1
Fabbri et al., 2019	30468137	TRD vs response	GWAS	GSRD	759	FBXW9
Fabbri et al., 2019	30468137	TRD vs response	GWAS	GSRD	759	GHRL
Fabbri et al., 2019	30468137	TRD vs response	Meta-analysis of GWAS	GSRD, STAR*D, GENDEP	2214	KRTAP15-1
Fabbri et al., 2019	30468137	TRD vs response	GWAS	GSRD	759	MKS1
Fabbri et al., 2019	30468137	TRD vs response	Meta-analysis of GWAS	GSRD, STAR*D, GENDEP	2214	MTRNR2L6
Fabbri et al., 2019	30468137	TRD vs response	Meta-analysis of GWAS	GSRD, STAR*D, GENDEP	2214	NEDD4
Fabbri et al., 2019	30468137	TRD vs response	GWAS	GSRD	759	PRPF6
Fabbri et al., 2019	30468137	TRD vs response	GWAS	GSRD	759	PSG11
Fabbri et al., 2019	30468137	TRD vs response	Meta-analysis of GWAS	GSRD, STAR*D, GENDEP	2214	PTHLH
Fabbri et al., 2019	30468137	TRD vs response	Meta-analysis of GWAS	GSRD, STAR*D, GENDEP	2214	PXN
Fabbri et al., 2019	30468137	TRD vs response	GWAS	GSRD	759	SCG3
Fabbri et al., 2019	30468137	TRD vs response	Meta-analysis of GWAS	GSRD, STAR*D, GENDEP	2214	SRGAP1
Fabbri et al., 2019	30468137	TRD vs response (improvement)	Meta-analysis of GWAS	GSRD, STAR*D, GENDEP	2214	C12orf57
Fabbri et al., 2019	30468137	TRD vs response (improvement)	GWAS	GSRD	759	C1QL1
Fabbri et al., 2019	30468137	TRD vs response (improvement)	GWAS	GSRD	759	CDK3
Fabbri et al., 2019	30468137	TRD vs response (improvement)	GWAS	GSRD	759	CHN1
Fabbri et al., 2019	30468137	TRD vs response (improvement)	GWAS	GSRD	759	CNEP1R1
Fabbri et al., 2019	30468137	TRD vs response (improvement)	GWAS	GSRD	759	COL12A1
Fabbri et al., 2019	30468137	TRD vs response (improvement)	GWAS	GSRD	759	CXXC1
Fabbri et al., 2019	30468137	TRD vs response (improvement)	GWAS	GSRD	759	EVPL
Fabbri et al., 2019	30468137	TRD vs response (improvement)	GWAS	GSRD	759	FAM214A
Fabbri et al., 2019	30468137	TRD vs response (improvement)	Meta-analysis of GWAS	GSRD, STAR*D, GENDEP	2214	MAP3K2
Fabbri et al., 2019	30468137	TRD vs response (improvement)	GWAS	GSRD	759	MPV17
Fabbri et al., 2019	30468137	TRD vs response (improvement)	Meta-analysis of GWAS	GSRD, STAR*D, GENDEP	2214	MTRNR2L6
Fabbri et al., 2019	30468137	TRD vs response (improvement)	GWAS	GSRD	759	PSG11
Fabbri et al., 2019	30468137	TRD vs response (improvement)	Meta-analysis of GWAS	GSRD, STAR*D, GENDEP	2214	PTHLH
Fabbri et al., 2019	30468137	TRD vs response (improvement)	Meta-analysis of GWAS	GSRD, STAR*D, GENDEP	2214	SRGAP1
Fabbri et al., 2019	30468137	TRD vs response (improvement)	GWAS	GSRD	759	ZDHHC3
Fabbri et al., 2019	30468137	TRD vs response or non responsers to a first AD	Meta-analysis of GWAS	GSRD, STAR*D, GENDEP	3225	ADD2
Fabbri et al., 2019	30468137	TRD vs response or non responsers to a first AD	GWAS	GSRD	1148	HES3
Fabbri et al., 2019	30468137	TRD vs response or non responsers to a first AD	Meta-analysis of GWAS	GSRD, STAR*D, GENDEP	3225	KRTAP15-1
Fabbri et al., 2019	30468137	TRD vs response or non responsers to a first AD	GWAS	GSRD	1148	MKI67
Fabbri et al., 2019	30468137	TRD vs response or non responsers to a first AD	Meta-analysis of GWAS	GSRD, STAR*D, GENDEP	3225	MYOZ3
Fabbri et al., 2019	30468137	TRD vs response or non responsers to a first AD	Meta-analysis of GWAS	GSRD, STAR*D, GENDEP	3225	OR4D2
Fabbri et al., 2019	30468137	TRD vs response or non responsers to a first AD	Meta-analysis of GWAS	GSRD, STAR*D, GENDEP	3225	PLEKHA6
Fabbri et al., 2019	30468137	TRD vs response or non responsers to a first AD	GWAS	GSRD	1148	POGZ
Fabbri et al., 2019	30468137	TRD vs response or non responsers to a first AD	Meta-analysis of GWAS	GSRD, STAR*D, GENDEP	3225	PTHLH
Fabbri et al., 2019	30468137	TRD vs response or non responsers to a first AD	Meta-analysis of GWAS	GSRD, STAR*D, GENDEP	3225	RBM22
Fabbri et al., 2019	30468137	TRD vs response or non responsers to a first AD	Meta-analysis of GWAS	GSRD, STAR*D, GENDEP	3225	RHBDF1
Fabbri et al., 2019	30468137	TRD vs response or non responsers to a first AD	GWAS	GSRD	1148	SOX12
Fabbri et al., 2019	30468137	TRD vs response or non responsers to a first AD	GWAS	GSRD	1148	XRCC1
Fabbri et al., 2018	29160301	AD remission	Meta-analysis of GWAS	escGENDEP, STAR*D	1422	AIRE
Fabbri et al., 2018	29160301	AD remission	Meta-analysis of GWAS	GENDEP, STAR*D	1739	CELSR2
Fabbri et al., 2018	29160301	AD remission	Meta-analysis of GWAS	escGENDEP, STAR*D	1422	DSC2
Fabbri et al., 2018	29160301	AD remission	Meta-analysis of GWAS	GENDEP, STAR*D	1739	LMNB2
Fabbri et al., 2018	29160301	AD remission	Meta-analysis of GWAS	GENDEP, STAR*D	1739	MYO9A
Fabbri et al., 2018	29160301	AD remission	Meta-analysis of GWAS	GENDEP, STAR*D	1739	PAG1
Fabbri et al., 2018	29160301	AD remission	Meta-analysis of GWAS	escGENDEP, STAR*D	1422	PAG1
Fabbri et al., 2018	29160301	AD remission	Meta-analysis of GWAS	GENDEP, STAR*D	1739	PARP6
Fabbri et al., 2018	29160301	AD remission	Meta-analysis of GWAS	escGENDEP, STAR*D	1422	PARP6
Fabbri et al., 2018	29160301	AD remission	Meta-analysis of GWAS	GENDEP, STAR*D	1739	PKM
Fabbri et al., 2018	29160301	AD remission	Meta-analysis of GWAS	escGENDEP, STAR*D	1422	PKM
Fabbri et al., 2018	29160301	AD remission	Meta-analysis of GWAS	GENDEP, STAR*D	1739	PPARD
Fabbri et al., 2018	29160301	AD remission	Meta-analysis of GWAS	escGENDEP, STAR*D	1422	PRKCSH
Fabbri et al., 2018	29160301	AD remission	Meta-analysis of GWAS	GENDEP, STAR*D	1739	RPUSD3
Fabbri et al., 2018	29160301	AD remission	Meta-analysis of GWAS	escGENDEP, STAR*D	1422	RPUSD3
Fabbri et al., 2018	29160301	AD remission	Meta-analysis of GWAS	escGENDEP, STAR*D	1422	SLCO3A1
Fabbri et al., 2018	29160301	AD remission	Meta-analysis of GWAS	GENDEP, STAR*D	1739	STARD4
Fabbri et al., 2018	29160301	AD remission	Meta-analysis of GWAS	escGENDEP, STAR*D	1422	TWSG1
Fabbri et al., 2018	29160301	AD response	Meta-analysis of GWAS	escGENDEP, STAR*D	1422	ADGRG5
Fabbri et al., 2018	29160301	AD response	Meta-analysis of GWAS	escGENDEP, STAR*D	1422	CCDC102A
Fabbri et al., 2018	29160301	AD response	Meta-analysis of GWAS	GENDEP, STAR*D	1739	CERS5
Fabbri et al., 2018	29160301	AD response	Meta-analysis of GWAS	GENDEP, STAR*D	1739	COX14
Fabbri et al., 2018	29160301	AD response	Meta-analysis of GWAS	GENDEP, STAR*D	1739	POU1F1
Fabbri et al., 2018	29160301	AD response	Meta-analysis of GWAS	escGENDEP, STAR*D	1422	POU1F1
Fabbri et al., 2018	29160301	AD response	Meta-analysis of GWAS	GENDEP, STAR*D	1739	PRAMEF11
Fabbri et al., 2018	29160301	AD response	Meta-analysis of GWAS	GENDEP, STAR*D	1739	PRSS35
Fabbri et al., 2018	29160301	AD response	Meta-analysis of GWAS	escGENDEP, STAR*D	1422	SREBF1
Fabbri et al., 2018	29160301	AD response	Meta-analysis of GWAS	GENDEP, STAR*D	1739	VPREB1
Fabbri et al., 2018	29160301	AD response	Meta-analysis of GWAS	escGENDEP, STAR*D	1422	ZNF549
Fabbri et al., 2018	29160301	AD response	Meta-analysis of GWAS	GENDEP, STAR*D	1739	OR4K2
Hunter et al., 2013	23726668	AD response	GWAS	STAR*D citalopram - sustained vs unsustaind response	1116	C9ORF16
Hunter et al., 2013	23726668	AD response	GWAS	STAR*D citalopram - sustained vs unsustaind response	1116	LCN2
Hunter et al., 2013	23726668	AD response	GWAS	STAR*D citalopram - sustained vs unsustaind response	1116	GPHA2
Hunter et al., 2013	23726668	AD response	GWAS	STAR*D citalopram - sustained vs unsustaind response	1116	PPP2R5B
Hunter et al., 2013	23726668	AD response	GWAS	STAR*D citalopram - sustained vs unsustaind response	1116	C11ORF85
Hunter et al., 2013	23726668	AD response	GWAS	STAR*D citalopram - sustained vs unsustaind response	1116	B9D1
Hunter et al., 2013	23726668	AD response	GWAS	STAR*D citalopram - sustained vs unsustaind response	1116	EPN2
Clinical Dimensions
Goodman et al., 2024	38352337	Sleep (SHS-ADD)	GWAS	UKB	413904	MON1A
Goodman et al., 2024	38352337	Sleep (SHS-ADD)	GWAS	UKB	413904	RBM6
Goodman et al., 2024	38352337	Sleep (SHS-ADD)	GWAS	UKB	413904	SEMA3F
Goodman et al., 2024	38352337	Sleep (SHS-ADD)	GWAS	UKB	413904	RBM5
Goodman et al., 2024	38352337	Sleep (SHS-ADD)	GWAS	UKB	413904	LMOD1
Goodman et al., 2024	38352337	Sleep (SHS-ADD)	GWAS	UKB	413904	SHISA4
Goodman et al., 2024	38352337	Sleep (SHS-ADD)	GWAS	UKB	413904	MST1R
Goodman et al., 2024	38352337	Sleep (SHS-ADD)	GWAS	UKB	413904	KLHDC8B
Goodman et al., 2024	38352337	Sleep (SHS-ADD)	GWAS	UKB	413904	IPO9
Goodman et al., 2024	38352337	Sleep (SHS-ADD)	GWAS	UKB	413904	S100PBP
Goodman et al., 2024	38352337	Sleep (SHS-ADD)	GWAS	UKB	413904	CAMKV
Goodman et al., 2024	38352337	Sleep (SHS-ADD)	GWAS	UKB	413904	UBA7
Goodman et al., 2024	38352337	Sleep (SHS-ADD)	GWAS	UKB	413904	PRICKLE4
Goodman et al., 2024	38352337	Sleep (SHS-ADD)	GWAS	UKB	413904	YARS
Goodman et al., 2024	38352337	Sleep (SHS-ADD)	GWAS	UKB	413904	CCDC71
Goodman et al., 2024	38352337	Sleep (SHS-ADD)	GWAS	UKB	413904	BSN
Goodman et al., 2024	38352337	Sleep (SHS-ADD)	GWAS	UKB	413904	USP49
Goodman et al., 2024	38352337	Sleep (SHS-ADD)	GWAS	UKB	413904	CCDC36
Goodman et al., 2024	38352337	Sleep (SHS-ADD)	GWAS	UKB	413904	AMIGO3
Goodman et al., 2024	38352337	Sleep (SHS-ADD)	GWAS	UKB	413904	GMPPB
Goodman et al., 2024	38352337	Sleep (SHS-ADD)	GWAS	UKB	413904	IP6K1
Goodman et al., 2024	38352337	Sleep (SHS-ADD)	GWAS	UKB	413904	FNIP2
Goodman et al., 2024	38352337	Sleep (SHS-ADD)	GWAS	UKB	413904	DDI2
Goodman et al., 2024	38352337	Sleep (SHS-ADD)	GWAS	UKB	413904	C3orf84
Goodman et al., 2024	38352337	Sleep (SHS-ADD)	GWAS	UKB	413904	KIAA1522
Goodman et al., 2024	38352337	Sleep (SHS-ADD)	GWAS	UKB	413904	TRAIP
Goodman et al., 2024	38352337	Sleep (SHS-ADD)	GWAS	UKB	413904	SPI1
Goodman et al., 2024	38352337	Sleep (SHS-ADD)	GWAS	UKB	413904	CTD-2330K9.3
Goodman et al., 2024	38352337	Sleep (SHS-ADD)	GWAS	UKB	413904	ROBO2
Goodman et al., 2024	38352337	Sleep (SHS-ADD)	GWAS	UKB	413904	CDHR4
Goodman et al., 2024	38352337	Sleep (SHS-ADD)	GWAS	UKB	413904	FNDC5
Goodman et al., 2024	38352337	Sleep (SHS-ADD)	GWAS	UKB	413904	SMAD5
Goodman et al., 2024	38352337	Sleep (SHS-ADD)	GWAS	UKB	413904	FRS3
Goodman et al., 2024	38352337	Sleep (SHS-ADD)	GWAS	UKB	413904	DDC
Goodman et al., 2024	38352337	Sleep (SHS-ADD)	GWAS	UKB	413904	SLC39A13
Goodman et al., 2024	38352337	Sleep (SHS-ADD)	GWAS	UKB	413904	REEP3
Goodman et al., 2024	38352337	Sleep (SHS-ADD)	GWAS	UKB	413904	RNF123
Goodman et al., 2024	38352337	Sleep (SHS-ADD)	GWAS	UKB	413904	VAMP3
Goodman et al., 2024	38352337	Sleep (SHS-ADD)	GWAS	UKB	413904	NRBF2
Goodman et al., 2024	38352337	Sleep (SHS-ADD)	GWAS	UKB	413904	RP11-3B7.1
Goodman et al., 2024	38352337	Sleep (SHS-ADD)	GWAS	UKB	413904	PSMC3
Goodman et al., 2024	38352337	Sleep (SHS-ADD)	GWAS	UKB	413904	RGS16
Goodman et al., 2024	38352337	Sleep (SHS-ADD)	GWAS	UKB	413904	JMJD1C
Goodman et al., 2024	38352337	Sleep (SHS-ADD)	GWAS	UKB	413904	RHOA
Goodman et al., 2024	38352337	Sleep (SHS-ADD)	GWAS	UKB	413904	NAV1
Goodman et al., 2024	38352337	Sleep (SHS-ADD)	GWAS	UKB	413904	DALRD3
Goodman et al., 2024	38352337	Sleep (SHS-ADD)	GWAS	UKB	413904	DENND1A
Goodman et al., 2024	38352337	Sleep (SHS-ADD)	GWAS	UKB	413904	USP4
Goodman et al., 2024	38352337	Sleep (SHS-ADD)	GWAS	UKB	413904	PLEKHM2
Goodman et al., 2024	38352337	Sleep (SHS-ADD)	GWAS	UKB	413904	MEIS1
Goodman et al., 2024	38352337	Sleep (SHS-ADD)	GWAS	UKB	413904	MSRA
Goodman et al., 2024	38352337	Sleep (SHS-ADD)	GWAS	UKB	413904	TCTA
Goodman et al., 2024	38352337	Sleep (SHS-ADD)	GWAS	UKB	413904	USP19
Goodman et al., 2024	38352337	Sleep (SHS-ADD)	GWAS	UKB	413904	NRXN1
Goodman et al., 2024	38352337	Sleep (SHS-ADD)	GWAS	UKB	413904	PRKAR2A
Goodman et al., 2024	38352337	Sleep (SHS-ADD)	GWAS	UKB	413904	QRICH1
Goodman et al., 2024	38352337	Sleep (SHS-ADD)	GWAS	UKB	413904	HNRNPK
Goodman et al., 2024	38352337	Sleep (SHS-ADD)	GWAS	UKB	413904	SAMD5
Goodman et al., 2024	38352337	Sleep (SHS-ADD)	GWAS	UKB	413904	ARIH2
Goodman et al., 2024	38352337	Sleep (SHS-ADD)	GWAS	UKB	413904	GALNTL6
Goodman et al., 2024	38352337	Sleep (SHS-ADD)	GWAS	UKB	413904	DNAJC16
Goodman et al., 2024	38352337	Sleep (SHS-ADD)	GWAS	UKB	413904	UTS2
Goodman et al., 2024	38352337	Sleep (SHS-ADD)	GWAS	UKB	413904	SOX5
Goodman et al., 2024	38352337	Sleep (SHS-ADD)	GWAS	UKB	413904	TOMM6
Goodman et al., 2024	38352337	Sleep (SHS-ADD)	GWAS	UKB	413904	C4orf45
Goodman et al., 2024	38352337	Sleep (SHS-ADD)	GWAS	UKB	413904	SCAF11
Goodman et al., 2024	38352337	Sleep (SHS-ADD)	GWAS	UKB	413904	TMEM116
Goodman et al., 2024	38352337	Sleep (SHS-ADD)	GWAS	UKB	413904	GNAO1
Goodman et al., 2024	38352337	Sleep (SHS-ADD)	GWAS	UKB	413904	CELA2B
Goodman et al., 2024	38352337	Sleep (SHS-ADD)	GWAS	UKB	413904	NICN1
Goodman et al., 2024	38352337	Sleep (SHS-ADD)	GWAS	UKB	413904	DAG1
Goodman et al., 2024	38352337	Sleep (SHS-ADD)	GWAS	UKB	413904	NRXN3
Goodman et al., 2024	38352337	Sleep (SHS-ADD)	GWAS	UKB	413904	XKR6
Goodman et al., 2024	38352337	Sleep (SHS-ADD)	GWAS	UKB	413904	PTPRD
Goodman et al., 2024	38352337	Sleep (SHS-ADD)	GWAS	UKB	413904	PER3
Goodman et al., 2024	38352337	Sleep (SHS-PC1)	GWAS	UKB	413904	FOXP2
Goodman et al., 2024	38352337	Sleep (SHS-PC1)	GWAS	UKB	413904	TCF4
Goodman et al., 2024	38352337	Sleep (SHS-PC1)	GWAS	UKB	413904	SMAD5
Goodman et al., 2024	38352337	Sleep (SHS-PC1)	GWAS	UKB	413904	UBE3B
Goodman et al., 2024	38352337	Sleep (SHS-PC1)	GWAS	UKB	413904	MMAB
Goodman et al., 2024	38352337	Sleep (SHS-PC1)	GWAS	UKB	413904	LMOD1
Goodman et al., 2024	38352337	Sleep (SHS-PC1)	GWAS	UKB	413904	DAB1
Goodman et al., 2024	38352337	Sleep (SHS-PC1)	GWAS	UKB	413904	KCTD10
Goodman et al., 2024	38352337	Sleep (SHS-PC1)	GWAS	UKB	413904	PAM
Goodman et al., 2024	38352337	Sleep (SHS-PC1)	GWAS	UKB	413904	MVK
Goodman et al., 2024	38352337	Sleep (SHS-PC1)	GWAS	UKB	413904	SHISA4
Goodman et al., 2024	38352337	Sleep (SHS-PC1)	GWAS	UKB	413904	IPO9
Goodman et al., 2024	38352337	Sleep (SHS-PC1)	GWAS	UKB	413904	TRPC7
Goodman et al., 2024	38352337	Sleep (SHS-PC1)	GWAS	UKB	413904	MYO1H
Goodman et al., 2024	38352337	Sleep (SHS-PC1)	GWAS	UKB	413904	PSD4
Goodman et al., 2024	38352337	Sleep (SHS-PC1)	GWAS	UKB	413904	ASCC3
Goodman et al., 2024	38352337	Sleep (SHS-PC1)	GWAS	UKB	413904	KLRG1
Goodman et al., 2024	38352337	Sleep (SHS-PC1)	GWAS	UKB	413904	GIN1
Goodman et al., 2024	38352337	Sleep (SHS-PC1)	GWAS	UKB	413904	PDE4B
Goodman et al., 2024	38352337	Sleep (SHS-PC1)	GWAS	UKB	413904	LIN28B
Goodman et al., 2024	38352337	Sleep (SHS-PC1)	GWAS	UKB	413904	CUL9
Goodman et al., 2024	38352337	Sleep (SHS-PC1)	GWAS	UKB	413904	HEXIM2
Goodman et al., 2024	38352337	Sleep (SHS-PC1)	GWAS	UKB	413904	CHCHD3
Goodman et al., 2024	38352337	Sleep (SHS-PC1)	GWAS	UKB	413904	LSAMP
Goodman et al., 2024	38352337	Sleep (SHS-PC1)	GWAS	UKB	413904	CCDC36
Goodman et al., 2024	38352337	Sleep (SHS-PC1)	GWAS	UKB	413904	EGR2
Goodman et al., 2024	38352337	Sleep (SHS-PC1)	GWAS	UKB	413904	NRXN3
Goodman et al., 2024	38352337	Sleep (SHS-PC1)	GWAS	UKB	413904	SLC39A13
Goodman et al., 2024	38352337	Sleep (SHS-PC1)	GWAS	UKB	413904	DNPH1
Goodman et al., 2024	38352337	Sleep (SHS-PC1)	GWAS	UKB	413904	BUD13
Goodman et al., 2024	38352337	Sleep (SHS-PC1)	GWAS	UKB	413904	SDK1
Goodman et al., 2024	38352337	Sleep (SHS-PC1)	GWAS	UKB	413904	QARS
Goodman et al., 2024	38352337	Sleep (SHS-PC1)	GWAS	UKB	413904	SPI1
Goodman et al., 2024	38352337	Sleep (SHS-PC1)	GWAS	UKB	413904	KLHDC8B
Goodman et al., 2024	38352337	Sleep (SHS-PC1)	GWAS	UKB	413904	NAB2
Goodman et al., 2024	38352337	Sleep (SHS-PC1)	GWAS	UKB	413904	M6PR
Goodman et al., 2024	38352337	Sleep (SHS-PC1)	GWAS	UKB	413904	IP6K2
Goodman et al., 2024	38352337	Sleep (SHS-PC1)	GWAS	UKB	413904	PSMC3
Goodman et al., 2024	38352337	Sleep (SHS-PC1)	GWAS	UKB	413904	SGCZ
Goodman et al., 2024	38352337	Sleep (SHS-PC1)	GWAS	UKB	413904	QRICH1
Goodman et al., 2024	38352337	Sleep (SHS-PC1)	GWAS	UKB	413904	FTO
Goodman et al., 2024	38352337	Sleep (SHS-PC1)	GWAS	UKB	413904	DNMT3A
Goodman et al., 2024	38352337	Sleep (SHS-PC1)	GWAS	UKB	413904	CYP2W1
Goodman et al., 2024	38352337	Sleep (SHS-PC1)	GWAS	UKB	413904	ANKFY1
Goodman et al., 2024	38352337	Sleep (SHS-PC1)	GWAS	UKB	413904	NAV1
Goodman et al., 2024	38352337	Sleep (SHS-PC1)	GWAS	UKB	413904	IMPDH2
Goodman et al., 2024	38352337	Sleep (SHS-PC1)	GWAS	UKB	413904	CUX1
Goodman et al., 2024	38352337	Sleep (SHS-PC1)	GWAS	UKB	413904	NMB
Goodman et al., 2024	38352337	Sleep (SHS-PC1)	GWAS	UKB	413904	ACBD4
Goodman et al., 2024	38352337	Sleep (SHS-PC1)	GWAS	UKB	413904	ARHGAP15
Goodman et al., 2024	38352337	Sleep (SHS-PC1)	GWAS	UKB	413904	PHC1
Goodman et al., 2024	38352337	Sleep (SHS-PC1)	GWAS	UKB	413904	CRADD
Goodman et al., 2024	38352337	Sleep (SHS-PC1)	GWAS	UKB	413904	TTBK1
Goodman et al., 2024	38352337	Sleep (SHS-PC1)	GWAS	UKB	413904	C3orf58
Goodman et al., 2024	38352337	Sleep (SHS-PC1)	GWAS	UKB	413904	HEXIM1
Goodman et al., 2024	38352337	Sleep (SHS-PC1)	GWAS	UKB	413904	PTK7
Goodman et al., 2024	38352337	Sleep (SHS-PC1)	GWAS	UKB	413904	CCDC71
Goodman et al., 2024	38352337	Sleep (SHS-PC1)	GWAS	UKB	413904	MLLT10
Goodman et al., 2024	38352337	Sleep (SHS-PC1)	GWAS	UKB	413904	BIN3
Goodman et al., 2024	38352337	Sleep (SHS-PC1)	GWAS	UKB	413904	CALML6
Goodman et al., 2024	38352337	Sleep (SHS-PC1)	GWAS	UKB	413904	LONRF1
Goodman et al., 2024	38352337	Sleep (SHS-PC1)	GWAS	UKB	413904	NTM
Goodman et al., 2024	38352337	Sleep (SHS-PC1)	GWAS	UKB	413904	PAX8
Goodman et al., 2024	38352337	Sleep (SHS-PC1)	GWAS	UKB	413904	KPNB1
Goodman et al., 2024	38352337	Sleep (SHS-PC1)	GWAS	UKB	413904	TAB1
Goodman et al., 2024	38352337	Sleep (SHS-PC1)	GWAS	UKB	413904	CXXC4
Goodman et al., 2024	38352337	Sleep (SHS-PC1)	GWAS	UKB	413904	SLC6A3
Goodman et al., 2024	38352337	Sleep (SHS-PC1)	GWAS	UKB	413904	CPLX2
Goodman et al., 2024	38352337	Sleep (SHS-PC1)	GWAS	UKB	413904	PRKAR2A
Goodman et al., 2024	38352337	Sleep (SHS-PC1)	GWAS	UKB	413904	STOML1
Goodman et al., 2024	38352337	Sleep (SHS-PC1)	GWAS	UKB	413904	ARIH2
Goodman et al., 2024	38352337	Sleep (SHS-PC1)	GWAS	UKB	413904	CTD-2330K9.3
Goodman et al., 2024	38352337	Sleep (SHS-PC1)	GWAS	UKB	413904	FAM83B
Goodman et al., 2024	38352337	Sleep (SHS-PC1)	GWAS	UKB	413904	C5orf30
Goodman et al., 2024	38352337	Sleep (SHS-PC1)	GWAS	UKB	413904	RBFOX1
Goodman et al., 2024	38352337	Sleep (SHS-PC1)	GWAS	UKB	413904	PPIP5K2
Goodman et al., 2024	38352337	Sleep (SHS-PC1)	GWAS	UKB	413904	C2orf47
Goodman et al., 2024	38352337	Sleep (SHS-PC1)	GWAS	UKB	413904	CASC10
Goodman et al., 2024	38352337	Sleep (SHS-PC1)	GWAS	UKB	413904	RP11-379H8.1
Goodman et al., 2024	38352337	Sleep (SHS-PC1)	GWAS	UKB	413904	NADK
Goodman et al., 2024	38352337	Sleep (SHS-PC1)	GWAS	UKB	413904	PTGER3
Goodman et al., 2024	38352337	Sleep (SHS-PC1)	GWAS	UKB	413904	GNB1
Goodman et al., 2024	38352337	Sleep (SHS-PC1)	GWAS	UKB	413904	TMEM194B
Goodman et al., 2024	38352337	Sleep (SHS-PC1)	GWAS	UKB	413904	WDR6
Goodman et al., 2024	38352337	Sleep (SHS-PC1)	GWAS	UKB	413904	MFHAS1
Goodman et al., 2024	38352337	Sleep (SHS-PC1)	GWAS	UKB	413904	MLF1
Goodman et al., 2024	38352337	Sleep (SHS-PC1)	GWAS	UKB	413904	ZNF592
Goodman et al., 2024	38352337	Sleep (SHS-PC1)	GWAS	UKB	413904	C3orf62
Goodman et al., 2024	38352337	Sleep (SHS-PC1)	GWAS	UKB	413904	RP11-463C8.4
Goodman et al., 2024	38352337	Sleep (SHS-PC1)	GWAS	UKB	413904	ACVR2A
Goodman et al., 2024	38352337	Sleep (SHS-PC1)	GWAS	UKB	413904	GIP
Goodman et al., 2024	38352337	Sleep (SHS-PC1)	GWAS	UKB	413904	MON1A
Goodman et al., 2024	38352337	Sleep (SHS-PC1)	GWAS	UKB	413904	MSRA
Goodman et al., 2024	38352337	Sleep (SHS-PC1)	GWAS	UKB	413904	FGF14
Goodman et al., 2024	38352337	Sleep (SHS-PC1)	GWAS	UKB	413904	HS6ST3
Goodman et al., 2024	38352337	Sleep (SHS-PC1)	GWAS	UKB	413904	MAPK1
Goodman et al., 2024	38352337	Sleep (SHS-PC1)	GWAS	UKB	413904	TMEM52
Goodman et al., 2024	38352337	Sleep (SHS-PC1)	GWAS	UKB	413904	PTPRD
Goodman et al., 2024	38352337	Sleep (SHS-PC1)	GWAS	UKB	413904	DIS3L
Goodman et al., 2024	38352337	Sleep (SHS-PC1)	GWAS	UKB	413904	HLA-G
Goodman et al., 2024	38352337	Sleep (SHS-PC1)	GWAS	UKB	413904	IQCF1
Goodman et al., 2024	38352337	Sleep (SHS-PC1)	GWAS	UKB	413904	LEMD2
Goodman et al., 2024	38352337	Sleep (SHS-PC1)	GWAS	UKB	413904	ERI3
Goodman et al., 2024	38352337	Sleep (SHS-PC1)	GWAS	UKB	413904	SRF
Goodman et al., 2024	38352337	Sleep (SHS-PC1)	GWAS	UKB	413904	WDR73
Goodman et al., 2024	38352337	Sleep (SHS-PC1)	GWAS	UKB	413904	USP19
Goodman et al., 2024	38352337	Sleep (SHS-PC1)	GWAS	UKB	413904	TTC36
Goodman et al., 2024	38352337	Sleep (SHS-PC1)	GWAS	UKB	413904	SAAL1
Goodman et al., 2024	38352337	Sleep (SHS-PC1)	GWAS	UKB	413904	MEIS1
Goodman et al., 2024	38352337	Sleep (SHS-PC1)	GWAS	UKB	413904	TET1
Goodman et al., 2024	38352337	Sleep (SHS-PC1)	GWAS	UKB	413904	RBM6
Goodman et al., 2024	38352337	Sleep (SHS-PC1)	GWAS	UKB	413904	PKP4
Goodman et al., 2024	38352337	Sleep (SHS-PC1)	GWAS	UKB	413904	FANCL
Goodman et al., 2024	38352337	Sleep (SHS-PC1)	GWAS	UKB	413904	RARRES1
Goodman et al., 2024	38352337	Sleep (SHS-PC1)	GWAS	UKB	413904	NPEPPS
Goodman et al., 2024	38352337	Sleep (SHS-PC1)	GWAS	UKB	413904	MALRD1
Goodman et al., 2024	38352337	Sleep (SHS-PC1)	GWAS	UKB	413904	MYBPC3
Goodman et al., 2024	38352337	Sleep (SHS-PC1)	GWAS	UKB	413904	HTR4
Goodman et al., 2024	38352337	Sleep (SHS-PC1)	GWAS	UKB	413904	ELAVL2
Goodman et al., 2024	38352337	Sleep (SHS-PC1)	GWAS	UKB	413904	SEMA6D
Goodman et al., 2024	38352337	Sleep (SHS-PC1)	GWAS	UKB	413904	YTHDC1
Goodman et al., 2024	38352337	Sleep (SHS-PC1)	GWAS	UKB	413904	NCKIPSD
Goodman et al., 2024	38352337	Sleep (SHS-PC1)	GWAS	UKB	413904	MAD1L1
Goodman et al., 2024	38352337	Sleep (SHS-PC1)	GWAS	UKB	413904	SNAPC5
Goodman et al., 2024	38352337	Sleep (SHS-PC1)	GWAS	UKB	413904	RP11-152F13.10
Goodman et al., 2024	38352337	Sleep (SHS-PC1)	GWAS	UKB	413904	ZFP57
Goodman et al., 2024	38352337	Sleep (SHS-PC1)	GWAS	UKB	413904	IGF2BP1
Goodman et al., 2024	38352337	Sleep (SHS-PC1)	GWAS	UKB	413904	PHF2
Goodman et al., 2024	38352337	Sleep (SHS-PC1)	GWAS	UKB	413904	TIPIN
Goodman et al., 2024	38352337	Sleep (SHS-PC1)	GWAS	UKB	413904	RBM5
Goodman et al., 2024	38352337	Sleep (SHS-PC1)	GWAS	UKB	413904	TPH1
Goodman et al., 2024	38352337	Sleep (SHS-PC1)	GWAS	UKB	413904	SEC11A
Goodman et al., 2024	38352337	Sleep (SHS-PC2)	GWAS	UKB	413904	MAPKAP1
Goodman et al., 2024	38352337	Sleep (SHS-PC2)	GWAS	UKB	413904	RP11-127H5.1
Goodman et al., 2024	38352337	Sleep (SHS-PC2)	GWAS	UKB	413904	MSRB3
Goodman et al., 2024	38352337	Sleep (SHS-PC2)	GWAS	UKB	413904	SEMA3D
Goodman et al., 2024	38352337	Sleep (SHS-PC2)	GWAS	UKB	413904	GAPVD1
Goodman et al., 2024	38352337	Sleep (SHS-PC2)	GWAS	UKB	413904	MAPK8IP3
Goodman et al., 2024	38352337	Sleep (SHS-PC2)	GWAS	UKB	413904	SNAP91
Goodman et al., 2024	38352337	Sleep (SHS-PC2)	GWAS	UKB	413904	SND1
Goodman et al., 2024	38352337	Sleep (SHS-PC2)	GWAS	UKB	413904	KSR2
Goodman et al., 2024	38352337	Sleep (SHS-PC2)	GWAS	UKB	413904	RGS17
Goodman et al., 2024	38352337	Sleep (SHS-PC2)	GWAS	UKB	413904	C10orf11
Goodman et al., 2024	38352337	Sleep (SHS-PC2)	GWAS	UKB	413904	SUSD4
Goodman et al., 2024	38352337	Sleep (SHS-PC2)	GWAS	UKB	413904	HN1L
Goodman et al., 2024	38352337	Sleep (SHS-PC2)	GWAS	UKB	413904	INADL
Goodman et al., 2024	38352337	Sleep (SHS-PC2)	GWAS	UKB	413904	BDNF
Goodman et al., 2024	38352337	Sleep (SHS-PC2)	GWAS	UKB	413904	MAP1S
Goodman et al., 2024	38352337	Sleep (SHS-PC2)	GWAS	UKB	413904	IFT140
Goodman et al., 2024	38352337	Sleep (SHS-PC2)	GWAS	UKB	413904	L1TD1
Goodman et al., 2024	38352337	Sleep (SHS-PC2)	GWAS	UKB	413904	LA16c-431H6.6
Goodman et al., 2024	38352337	Sleep (SHS-PC2)	GWAS	UKB	413904	EXOC4
Goodman et al., 2024	38352337	Sleep (SHS-PC2)	GWAS	UKB	413904	DLEU1
Goodman et al., 2024	38352337	Sleep (SHS-PC2)	GWAS	UKB	413904	CRAMP1L
Goodman et al., 2024	38352337	Sleep (SHS-PC2)	GWAS	UKB	413904	ROBO1
Goodman et al., 2024	38352337	Sleep (SHS-PC2)	GWAS	UKB	413904	MTRNR2L9
Goodman et al., 2024	38352337	Sleep (SHS-PC2)	GWAS	UKB	413904	FCHO1
Goodman et al., 2024	38352337	Sleep (SHS-PC2)	GWAS	UKB	413904	CTBP2
Goodman et al., 2024	38352337	Sleep (SHS-PC2)	GWAS	UKB	413904	PIEZO1
Goodman et al., 2024	38352337	Sleep (SHS-PC2)	GWAS	UKB	413904	HMGN1
Goodman et al., 2024	38352337	Sleep (SHS-PC2)	GWAS	UKB	413904	SKAP1
Goodman et al., 2024	38352337	Sleep (SHS-PC2)	GWAS	UKB	413904	XKR9
Goodman et al., 2024	38352337	Sleep (SHS-PC2)	GWAS	UKB	413904	DRAM1
Goodman et al., 2024	38352337	Sleep (SHS-PC2)	GWAS	UKB	413904	PDZRN4
Goodman et al., 2024	38352337	Sleep (SHS-PC2)	GWAS	UKB	413904	CADM2
Goodman et al., 2024	38352337	Sleep (SHS-PC2)	GWAS	UKB	413904	S100PBP
Goodman et al., 2024	38352337	Sleep (SHS-PC2)	GWAS	UKB	413904	NRXN3
Goodman et al., 2024	38352337	Sleep (SHS-PC2)	GWAS	UKB	413904	APOBR
Goodman et al., 2024	38352337	Sleep (SHS-PC2)	GWAS	UKB	413904	WIPF2
Goodman et al., 2024	38352337	Sleep (SHS-PC2)	GWAS	UKB	413904	CLN3
Goodman et al., 2024	38352337	Sleep (SHS-PC2)	GWAS	UKB	413904	HOXB2
Goodman et al., 2024	38352337	Sleep (SHS-PC2)	GWAS	UKB	413904	CLN3
Goodman et al., 2024	38352337	Sleep (SHS-PC2)	GWAS	UKB	413904	LACTB2
Goodman et al., 2024	38352337	Sleep (SHS-PC2)	GWAS	UKB	413904	YARS
Goodman et al., 2024	38352337	Sleep (SHS-PC2)	GWAS	UKB	413904	ATP8A1
Goodman et al., 2024	38352337	Sleep (SHS-PC2)	GWAS	UKB	413904	CD68
Goodman et al., 2024	38352337	Sleep (SHS-PC2)	GWAS	UKB	413904	TSPAN5
Goodman et al., 2024	38352337	Sleep (SHS-PC2)	GWAS	UKB	413904	PRSS35
Goodman et al., 2024	38352337	Sleep (SHS-PC2)	GWAS	UKB	413904	TMEM204
Goodman et al., 2024	38352337	Sleep (SHS-PC2)	GWAS	UKB	413904	STX4
Goodman et al., 2024	38352337	Sleep (SHS-PC2)	GWAS	UKB	413904	SLC38A2
Goodman et al., 2024	38352337	Sleep (SHS-PC2)	GWAS	UKB	413904	KHDRBS2
Goodman et al., 2024	38352337	Sleep (SHS-PC2)	GWAS	UKB	413904	MAST2
Goodman et al., 2024	38352337	Sleep (SHS-PC2)	GWAS	UKB	413904	MTMR3
Goodman et al., 2024	38352337	Sleep (SHS-PC2)	GWAS	UKB	413904	CEP120
Goodman et al., 2024	38352337	Sleep (SHS-PC2)	GWAS	UKB	413904	ATP6V1E2
Goodman et al., 2024	38352337	Sleep (SHS-PC2)	GWAS	UKB	413904	SLC7A6
Goodman et al., 2024	38352337	Sleep (SHS-PC2)	GWAS	UKB	413904	CCDC101
Goodman et al., 2024	38352337	Sleep (SHS-PC2)	GWAS	UKB	413904	SULT1A2
Goodman et al., 2024	38352337	Sleep (SHS-PC2)	GWAS	UKB	413904	SNTG1
Goodman et al., 2024	38352337	Sleep (SHS-PC2)	GWAS	UKB	413904	GOSR2
Goodman et al., 2024	38352337	Sleep (SHS-PC2)	GWAS	UKB	413904	RP11-156P1.2
Goodman et al., 2024	38352337	Sleep (SHS-PC2)	GWAS	UKB	413904	RP11-379H8.1
Goodman et al., 2024	38352337	Sleep (SHS-PC2)	GWAS	UKB	413904	ATP2A1
Goodman et al., 2024	38352337	Sleep (SHS-PC2)	GWAS	UKB	413904	SH2B1
Goodman et al., 2024	38352337	Sleep (SHS-PC2)	GWAS	UKB	413904	RP11-343C2.7
Goodman et al., 2024	38352337	Sleep (SHS-PC2)	GWAS	UKB	413904	TMEM247
Goodman et al., 2024	38352337	Sleep (SHS-PC2)	GWAS	UKB	413904	TMED6
Goodman et al., 2024	38352337	Sleep (SHS-PC2)	GWAS	UKB	413904	EIF4G1
Goodman et al., 2024	38352337	Sleep (SHS-PC2)	GWAS	UKB	413904	HOXB1
Goodman et al., 2024	38352337	Sleep (SHS-PC2)	GWAS	UKB	413904	TUFM
Goodman et al., 2024	38352337	Sleep (SHS-PC3)	GWAS	UKB	413904	LRRTM4
Goodman et al., 2024	38352337	Sleep (SHS-PC3)	GWAS	UKB	413904	CAMKMT
Goodman et al., 2024	38352337	Sleep (SHS-PC3)	GWAS	UKB	413904	TNRC6B
Goodman et al., 2024	38352337	Sleep (SHS-PC3)	GWAS	UKB	413904	CPNE8
Goodman et al., 2024	38352337	Sleep (SHS-PC3)	GWAS	UKB	413904	GRB10
Goodman et al., 2024	38352337	Sleep (SHS-PC3)	GWAS	UKB	413904	RASA4B
Goodman et al., 2024	38352337	Sleep (SHS-PC3)	GWAS	UKB	413904	DDC
Goodman et al., 2024	38352337	Sleep (SHS-PC3)	GWAS	UKB	413904	FAM185A
Goodman et al., 2024	38352337	Sleep (SHS-PC3)	GWAS	UKB	413904	C1orf51
Goodman et al., 2024	38352337	Sleep (SHS-PC3)	GWAS	UKB	413904	ECM1
Goodman et al., 2024	38352337	Sleep (SHS-PC3)	GWAS	UKB	413904	SEC11C
Goodman et al., 2024	38352337	Sleep (SHS-PC3)	GWAS	UKB	413904	RGS16
Goodman et al., 2024	38352337	Sleep (SHS-PC3)	GWAS	UKB	413904	C1orf54
Goodman et al., 2024	38352337	Sleep (SHS-PC3)	GWAS	UKB	413904	RP11-514P8.6
Goodman et al., 2024	38352337	Sleep (SHS-PC3)	GWAS	UKB	413904	PLCL1
Goodman et al., 2024	38352337	Sleep (SHS-PC3)	GWAS	UKB	413904	VAMP3
Goodman et al., 2024	38352337	Sleep (SHS-PC3)	GWAS	UKB	413904	GNAO1
Goodman et al., 2024	38352337	Sleep (SHS-PC3)	GWAS	UKB	413904	TMEM161B
Goodman et al., 2024	38352337	Sleep (SHS-PC3)	GWAS	UKB	413904	MON1A
Goodman et al., 2024	38352337	Sleep (SHS-PC3)	GWAS	UKB	413904	RASD1
Goodman et al., 2024	38352337	Sleep (SHS-PC3)	GWAS	UKB	413904	MRPS21
Goodman et al., 2024	38352337	Sleep (SHS-PC3)	GWAS	UKB	413904	PMFBP1
Goodman et al., 2024	38352337	Sleep (SHS-PC3)	GWAS	UKB	413904	ANP32E
Goodman et al., 2024	38352337	Sleep (SHS-PC3)	GWAS	UKB	413904	ZCCHC7
Goodman et al., 2024	38352337	Sleep (SHS-PC3)	GWAS	UKB	413904	RBM6
Goodman et al., 2024	38352337	Sleep (SHS-PC3)	GWAS	UKB	413904	XKR6
Goodman et al., 2024	38352337	Sleep (SHS-PC3)	GWAS	UKB	413904	UTS2
Goodman et al., 2024	38352337	Sleep (SHS-PC3)	GWAS	UKB	413904	PAX5
Goodman et al., 2024	38352337	Sleep (SHS-PC3)	GWAS	UKB	413904	PCDH15
Goodman et al., 2024	38352337	Sleep (SHS-PC3)	GWAS	UKB	413904	PER3
Goodman et al., 2024	38352337	Sleep (SHS-PC3)	GWAS	UKB	413904	MST1R
Goodman et al., 2024	38352337	Sleep (SHS-PC3)	GWAS	UKB	413904	PREPL
Goodman et al., 2024	38352337	Sleep (SHS-PC3)	GWAS	UKB	413904	CTD-2330K9.3
Goodman et al., 2024	38352337	Sleep (SHS-PC3)	GWAS	UKB	413904	TANC2
Goodman et al., 2024	38352337	Sleep (SHS-PC3)	GWAS	UKB	413904	TCF20
Goodman et al., 2024	38352337	Sleep (SHS-PC3)	GWAS	UKB	413904	TRPS1
Goodman et al., 2024	38352337	Sleep (SHS-PC3)	GWAS	UKB	413904	HNRNPD
Goodman et al., 2024	38352337	Sleep (SHS-PC3)	GWAS	UKB	413904	RPRD2
Goodman et al., 2024	38352337	Sleep (SHS-PC3)	GWAS	UKB	413904	CYB561
Goodman et al., 2024	38352337	Sleep (SHS-PC3)	GWAS	UKB	413904	TRAF3IP1
Goodman et al., 2024	38352337	Sleep (SHS-PC3)	GWAS	UKB	413904	AK5
Goodman et al., 2024	38352337	Sleep (SHS-PC3)	GWAS	UKB	413904	CUX1
Goodman et al., 2024	38352337	Sleep (SHS-PC3)	GWAS	UKB	413904	FOXP4
Goodman et al., 2024	38352337	Sleep (SHS-PC3)	GWAS	UKB	413904	SLC3A1
Goodman et al., 2024	38352337	Sleep (SHS-PC3)	GWAS	UKB	413904	PER1
Goodman et al., 2024	38352337	Sleep (SHS-PC3)	GWAS	UKB	413904	PDZD8
Goodman et al., 2024	38352337	Sleep (SHS-PC3)	GWAS	UKB	413904	RP11-599B13.6
Goodman et al., 2024	38352337	Sleep (SHS-PC3)	GWAS	UKB	413904	CALN1
Goodman et al., 2024	38352337	Sleep (SHS-PC3)	GWAS	UKB	413904	HPR
Goodman et al., 2024	38352337	Sleep (SHS-PC3)	GWAS	UKB	413904	MFHAS1
Goodman et al., 2024	38352337	Sleep (SHS-PC3)	GWAS	UKB	413904	RBM5
Goodman et al., 2024	38352337	Sleep (SHS-PC3)	GWAS	UKB	413904	CA10
Goodman et al., 2024	38352337	Sleep (SHS-PC3)	GWAS	UKB	413904	SEMA3F
Goodman et al., 2024	38352337	Sleep (SHS-PC3)	GWAS	UKB	413904	PITPNC1
Goodman et al., 2024	38352337	Sleep (SHS-PC3)	GWAS	UKB	413904	FAM132B
Goodman et al., 2024	38352337	Sleep (SHS-PC3)	GWAS	UKB	413904	CAMKV
Goodman et al., 2024	38352337	Sleep (SHS-PC3)	GWAS	UKB	413904	AC011997.1
Goodman et al., 2024	38352337	Sleep (SHS-PC3)	GWAS	UKB	413904	EIF4G3
Goodman et al., 2024	38352337	Sleep (SHS-PC3)	GWAS	UKB	413904	NRXN1
Goodman et al., 2024	38352337	Sleep (SHS-PC3)	GWAS	UKB	413904	DDI2
Goodman et al., 2024	38352337	Sleep (SHS-PC3)	GWAS	UKB	413904	DGKG
Goodman et al., 2024	38352337	Sleep (SHS-PC3)	GWAS	UKB	413904	SAMD5
Goodman et al., 2024	38352337	Sleep (SHS-PC3)	GWAS	UKB	413904	PRPF3
Goodman et al., 2024	38352337	Sleep (SHS-PC3)	GWAS	UKB	413904	TARS2
Goodman et al., 2024	38352337	Sleep (SHS-PC3)	GWAS	UKB	413904	RNASEL
Goodman et al., 2024	38352337	Sleep (SHS-PC3)	GWAS	UKB	413904	BOLL
Goodman et al., 2024	38352337	Sleep (SHS-PC3)	GWAS	UKB	413904	ASB1
Goodman et al., 2024	38352337	Sleep (SHS-PC3)	GWAS	UKB	413904	ALG10B
Goodman et al., 2024	38352337	Sleep (SHS-PC3)	GWAS	UKB	413904	CLN5
Goodman et al., 2024	38352337	Sleep (SHS-PC3)	GWAS	UKB	413904	FBXL3
Goodman et al., 2024	38352337	Sleep (SHS-PC3)	GWAS	UKB	413904	ERI1
Goodman et al., 2024	38352337	Sleep (SHS-PC3)	GWAS	UKB	413904	GPR61
Goodman et al., 2024	38352337	Sleep (SHS-PC3)	GWAS	UKB	413904	AJAP1
Goodman et al., 2024	38352337	Sleep (SHS-PC3)	GWAS	UKB	413904	NMD3
Goodman et al., 2024	38352337	Sleep (SHS-PC3)	GWAS	UKB	413904	DENND1A
Goodman et al., 2024	38352337	Sleep (SHS-PC3)	GWAS	UKB	413904	ATAD2B
Goodman et al., 2024	38352337	Sleep (SHS-PC3)	GWAS	UKB	413904	HCRTR2
Goodman et al., 2024	38352337	Sleep (SHS-PC3)	GWAS	UKB	413904	ILKAP
Goodman et al., 2024	38352337	Sleep (SHS-PC3)	GWAS	UKB	413904	MED9
Goodman et al., 2024	38352337	Sleep (SHS-PC3)	GWAS	UKB	413904	SLC26A5
Goodman et al., 2024	38352337	Sleep (SHS-PC3)	GWAS	UKB	413904	SLC18A2
Goodman et al., 2024	38352337	Sleep (SHS-PC3)	GWAS	UKB	413904	INPP5E
Goodman et al., 2024	38352337	Sleep (SHS-PC3)	GWAS	UKB	413904	MSRA
Goodman et al., 2024	38352337	Sleep (SHS-PC3)	GWAS	UKB	413904	PMPCA
Goodman et al., 2024	38352337	Sleep (SHS-PC3)	GWAS	UKB	413904	SCAF11
Goodman et al., 2024	38352337	Sleep (SHS-PC3)	GWAS	UKB	413904	MEF2C
Goodman et al., 2024	38352337	Sleep (SHS-PC3)	GWAS	UKB	413904	PRLR
Goodman et al., 2024	38352337	Sleep (SHS-PC3)	GWAS	UKB	413904	AP2B1
Goodman et al., 2024	38352337	Sleep (SHS-PC3)	GWAS	UKB	413904	HTR6
Goodman et al., 2024	38352337	Sleep (SHS-PC3)	GWAS	UKB	413904	GPC6
Goodman et al., 2024	38352337	Sleep (SHS-PC3)	GWAS	UKB	413904	DNAJC2
Goodman et al., 2024	38352337	Sleep (SHS-PC3)	GWAS	UKB	413904	RASA4
Goodman et al., 2024	38352337	Sleep (SHS-PC3)	GWAS	UKB	413904	AF131215.5
Goodman et al., 2024	38352337	Sleep (SHS-PC3)	GWAS	UKB	413904	FBXL13
Goodman et al., 2024	38352337	Sleep (SHS-PC3)	GWAS	UKB	413904	SPTSSB
Goodman et al., 2024	38352337	Sleep (SHS-PC3)	GWAS	UKB	413904	ALG10
Goodman et al., 2024	38352337	Sleep (SHS-PC3)	GWAS	UKB	413904	ARHGAP15
Goodman et al., 2024	38352337	Sleep (SHS-PC3)	GWAS	UKB	413904	FAM83B
Goodman et al., 2024	38352337	Sleep (SHS-PC3)	GWAS	UKB	413904	DHODH
Goodman et al., 2024	38352337	Sleep (SHS-PC3)	GWAS	UKB	413904	PPM1L
Goodman et al., 2024	38352337	Sleep (SHS-PC3)	GWAS	UKB	413904	FIGNL1
Goodman et al., 2024	38352337	Sleep (SHS-PC3)	GWAS	UKB	413904	M6PR
Goodman et al., 2024	38352337	Sleep (SHS-PC3)	GWAS	UKB	413904	ARID2
Goodman et al., 2024	38352337	Sleep (SHS-PC3)	GWAS	UKB	413904	AL356356.1
Goodman et al., 2024	38352337	Sleep (SHS-PC3)	GWAS	UKB	413904	ALKBH4
Goodman et al., 2024	38352337	Sleep (SHS-PC3)	GWAS	UKB	413904	GNAI3
Goodman et al., 2024	38352337	Sleep (SHS-PC3)	GWAS	UKB	413904	PMPCB
Goodman et al., 2024	38352337	Sleep (SHS-PC3)	GWAS	UKB	413904	KLHL29
Goodman et al., 2024	38352337	Sleep (SHS-PC3)	GWAS	UKB	413904	POLR2J2
Goodman et al., 2024	38352337	Sleep (SHS-PC3)	GWAS	UKB	413904	POLR2J2
Goodman et al., 2024	38352337	Sleep (SHS-PC3)	GWAS	UKB	413904	PER2
Goodman et al., 2024	38352337	Sleep (SHS-PC3)	GWAS	UKB	413904	ATXN1L
Goodman et al., 2024	38352337	Sleep (SHS-PC3)	GWAS	UKB	413904	UBXN2A
Goodman et al., 2024	38352337	Sleep (SHS-PC3)	GWAS	UKB	413904	HP1BP3
Goodman et al., 2024	38352337	Sleep (SHS-PC3)	GWAS	UKB	413904	MACROD2
Goodman et al., 2024	38352337	Sleep (SHS-PC3)	GWAS	UKB	413904	SOX5
Goodman et al., 2024	38352337	Sleep (SHS-PC3)	GWAS	UKB	413904	IER5L
Goodman et al., 2024	38352337	Sleep (SHS-PC3)	GWAS	UKB	413904	CHMP7
Goodman et al., 2024	38352337	Sleep (SHS-PC3)	GWAS	UKB	413904	RFTN2
Goodman et al., 2024	38352337	Sleep (SHS-PC3)	GWAS	UKB	413904	ORAI2
Goodman et al., 2024	38352337	Sleep (SHS-PC3)	GWAS	UKB	413904	NEBL
Goodman et al., 2024	38352337	Sleep (SHS-PC3)	GWAS	UKB	413904	SYT16
Goodman et al., 2024	38352337	Sleep (SHS-PC3)	GWAS	UKB	413904	C18orf42
Goodman et al., 2024	38352337	Sleep (SHS-PC3)	GWAS	UKB	413904	TFAP2B
Goodman et al., 2024	38352337	Sleep (SHS-PC3)	GWAS	UKB	413904	KCNT2
Goodman et al., 2024	38352337	Sleep (SHS-PC3)	GWAS	UKB	413904	ROBO2
Goodman et al., 2024	38352337	Sleep (SHS-PC3)	GWAS	UKB	413904	EIF2AK4
Goodman et al., 2024	38352337	Sleep (SHS-PC3)	GWAS	UKB	413904	ZNF821
Goodman et al., 2024	38352337	Sleep (SHS-PC3)	GWAS	UKB	413904	ZIC4
Goodman et al., 2024	38352337	Sleep (SHS-PC3)	GWAS	UKB	413904	C8orf12
Goodman et al., 2024	38352337	Sleep (SHS-PC3)	GWAS	UKB	413904	GRIK5
Goodman et al., 2024	38352337	Sleep (SHS-PC3)	GWAS	UKB	413904	PHACTR1
Goodman et al., 2024	38352337	Sleep (SHS-PC3)	GWAS	UKB	413904	PHACTR2
Goodman et al., 2024	38352337	Sleep (SHS-PC3)	GWAS	UKB	413904	BLK
Goodman et al., 2024	38352337	Sleep (SHS-PC3)	GWAS	UKB	413904	KCNIP4
Goodman et al., 2024	38352337	Sleep (SHS-PC3)	GWAS	UKB	413904	FOXP2
Goodman et al., 2024	38352337	Sleep (SHS-PC3)	GWAS	UKB	413904	ZMYND10
Goodman et al., 2024	38352337	Sleep (SHS-PC3)	GWAS	UKB	413904	SGK223
Goodman et al., 2024	38352337	Sleep (SHS-PC3)	GWAS	UKB	413904	IST1
Goodman et al., 2024	38352337	Sleep (SHS-PC3)	GWAS	UKB	413904	CA14
Goodman et al., 2024	38352337	Sleep (SHS-PC3)	GWAS	UKB	413904	PTPRD
Goodman et al., 2024	38352337	Sleep (SHS-PC3)	GWAS	UKB	413904	OTX2
Goodman et al., 2024	38352337	Sleep (SHS-PC3)	GWAS	UKB	413904	ZIC1
Goodman et al., 2024	38352337	Sleep (SHS-PC3)	GWAS	UKB	413904	C2orf44
Goodman et al., 2024	38352337	Sleep (SHS-PC3)	GWAS	UKB	413904	TFEC
Goodman et al., 2024	38352337	Sleep (SHS-PC3)	GWAS	UKB	413904	SDCCAG3
Goodman et al., 2024	38352337	Sleep (SHS-PC3)	GWAS	UKB	413904	ZCCHC2
Goodman et al., 2024	38352337	Sleep (SHS-PC3)	GWAS	UKB	413904	DRD2
Goodman et al., 2024	38352337	Sleep (SHS-PC3)	GWAS	UKB	413904	MARS2
Goodman et al., 2024	38352337	Sleep (SHS-PC3)	GWAS	UKB	413904	ZFP91
Goodman et al., 2024	38352337	Sleep (SHS-PC3)	GWAS	UKB	413904	OR5B2
Goodman et al., 2024	38352337	Sleep (SHS-PC3)	GWAS	UKB	413904	MTNR1B
Goodman et al., 2024	38352337	Sleep (SHS-PC3)	GWAS	UKB	413904	ELTD1
Goodman et al., 2024	38352337	Sleep (SHS-PC3)	GWAS	UKB	413904	TXNL4B
Goodman et al., 2024	38352337	Sleep (SHS-PC3)	GWAS	UKB	413904	RP11-147C23.1
Goodman et al., 2024	38352337	Sleep (SHS-PC3)	GWAS	UKB	413904	PDE1C
Goodman et al., 2024	38352337	Sleep (SHS-PC3)	GWAS	UKB	413904	MEIS2
Goodman et al., 2024	38352337	Sleep (SHS-PC3)	GWAS	UKB	413904	USP49
Goodman et al., 2024	38352337	Sleep (SHS-PC3)	GWAS	UKB	413904	POU2F2
Goodman et al., 2024	38352337	Sleep (SHS-PC3)	GWAS	UKB	413904	TBC1D5
Goodman et al., 2024	38352337	Sleep (SHS-PC3)	GWAS	UKB	413904	SMC1B
Goodman et al., 2024	38352337	Sleep (SHS-PC3)	GWAS	UKB	413904	TMEM108
Goodman et al., 2024	38352337	Sleep (SHS-PC3)	GWAS	UKB	413904	INADL
Goodman et al., 2024	38352337	Sleep (SHS-PC3)	GWAS	UKB	413904	YWHAB
Goodman et al., 2024	38352337	Sleep (SHS-PC3)	GWAS	UKB	413904	GNAT2
Goodman et al., 2024	38352337	Sleep (SHS-PC3)	GWAS	UKB	413904	UNC5D
Goodman et al., 2024	38352337	Sleep (SHS-PC3)	GWAS	UKB	413904	EPC2
Goodman et al., 2024	38352337	Sleep (SHS-PC3)	GWAS	UKB	413904	ATE1
Goodman et al., 2024	38352337	Sleep (SHS-PC3)	GWAS	UKB	413904	DBN1
Goodman et al., 2024	38352337	Sleep (SHS-PC3)	GWAS	UKB	413904	RSC1A1
Goodman et al., 2024	38352337	Sleep (SHS-PC3)	GWAS	UKB	413904	FAT3
Goodman et al., 2024	38352337	Sleep (SHS-PC3)	GWAS	UKB	413904	AXDND1
Goodman et al., 2024	38352337	Sleep (SHS-PC3)	GWAS	UKB	413904	ZFP91-CNTF
Goodman et al., 2024	38352337	Sleep (SHS-PC3)	GWAS	UKB	413904	KLRG1
Goodman et al., 2024	38352337	Sleep (SHS-PC3)	GWAS	UKB	413904	PNMAL2
Goodman et al., 2024	38352337	Sleep (SHS-PC3)	GWAS	UKB	413904	SEMA6D
Goodman et al., 2024	38352337	Sleep (SHS-PC3)	GWAS	UKB	413904	TOX3
Goodman et al., 2024	38352337	Sleep (SHS-PC3)	GWAS	UKB	413904	DPYD
Goodman et al., 2024	38352337	Sleep (SHS-PC3)	GWAS	UKB	413904	AC011484.1
Goodman et al., 2024	38352337	Sleep (SHS-PC3)	GWAS	UKB	413904	MFSD2B
Goodman et al., 2024	38352337	Sleep (SHS-PC3)	GWAS	UKB	413904	ZBTB16
Goodman et al., 2024	38352337	Sleep (SHS-PC3)	GWAS	UKB	413904	CBX5
Goodman et al., 2024	38352337	Sleep (SHS-PC3)	GWAS	UKB	413904	KLHL30
Goodman et al., 2024	38352337	Sleep (SHS-PC3)	GWAS	UKB	413904	GRK6
Goodman et al., 2024	38352337	Sleep (SHS-PC3)	GWAS	UKB	413904	PPM1B
Goodman et al., 2024	38352337	Sleep (SHS-PC3)	GWAS	UKB	413904	MYCBP2
Goodman et al., 2024	38352337	Sleep (SHS-PC3)	GWAS	UKB	413904	PRR7
Goodman et al., 2024	38352337	Sleep (SHS-PC3)	GWAS	UKB	413904	SH3BP2
Goodman et al., 2024	38352337	Sleep (SHS-PC3)	GWAS	UKB	413904	GSK3A
Goodman et al., 2024	38352337	Sleep (SHS-PC3)	GWAS	UKB	413904	RP11-195F19.5
Goodman et al., 2024	38352337	Sleep (SHS-PC3)	GWAS	UKB	413904	PHC1
Goodman et al., 2024	38352337	Sleep (SHS-PC3)	GWAS	UKB	413904	SIRT1
Goodman et al., 2024	38352337	Sleep (SHS-PC3)	GWAS	UKB	413904	TNKS
Goodman et al., 2024	38352337	Sleep (SHS-PC3)	GWAS	UKB	413904	NEK6
Goodman et al., 2024	38352337	Sleep (SHS-PC3)	GWAS	UKB	413904	RASL10B
Goodman et al., 2024	38352337	Sleep (SHS-PC3)	GWAS	UKB	413904	AURKB
Goodman et al., 2024	38352337	Sleep (SHS-PC3)	GWAS	UKB	413904	DCTN3
Goodman et al., 2024	38352337	Sleep (SHS-PC3)	GWAS	UKB	413904	ST18
Goodman et al., 2024	38352337	Sleep (SHS-PC3)	GWAS	UKB	413904	PLEKHM2
Goodman et al., 2024	38352337	Sleep (SHS-PC3)	GWAS	UKB	413904	PCSK2
Goodman et al., 2024	38352337	Sleep (SHS-PC3)	GWAS	UKB	413904	FKBP9
Goodman et al., 2024	38352337	Sleep (SHS-PC3)	GWAS	UKB	413904	SOX6
Goodman et al., 2024	38352337	Sleep (SHS-PC3)	GWAS	UKB	413904	HEMK1
Goodman et al., 2024	38352337	Sleep (SHS-PC3)	GWAS	UKB	413904	UBXN7
Goodman et al., 2024	38352337	Sleep (SHS-PC3)	GWAS	UKB	413904	EXOC4
Goodman et al., 2024	38352337	Sleep (SHS-PC3)	GWAS	UKB	413904	RNF4
Goodman et al., 2024	38352337	Sleep (SHS-PC3)	GWAS	UKB	413904	FAM118A
Goodman et al., 2024	38352337	Sleep (SHS-PC3)	GWAS	UKB	413904	PSMC2
Goodman et al., 2024	38352337	Sleep (SHS-PC3)	GWAS	UKB	413904	NMUR2
Goodman et al., 2024	38352337	Sleep (SHS-PC3)	GWAS	UKB	413904	MPPED2
Goodman et al., 2024	38352337	Sleep (SHS-PC3)	GWAS	UKB	413904	COPZ2
Goodman et al., 2024	38352337	Sleep (SHS-PC3)	GWAS	UKB	413904	C3orf18
Goodman et al., 2024	38352337	Sleep (SHS-PC3)	GWAS	UKB	413904	CARD9
Goodman et al., 2024	38352337	Sleep (SHS-PC3)	GWAS	UKB	413904	MOB4
Goodman et al., 2024	38352337	Sleep (SHS-PC3)	GWAS	UKB	413904	ZNF789
Goodman et al., 2024	38352337	Sleep (SHS-PC3)	GWAS	UKB	413904	COQ10B
Goodman et al., 2024	38352337	Sleep (SHS-PC3)	GWAS	UKB	413904	SCN8A
Goodman et al., 2024	38352337	Sleep (SHS-PC3)	GWAS	UKB	413904	MTMR9
Goodman et al., 2024	38352337	Sleep (SHS-PC3)	GWAS	UKB	413904	BEGAIN
Goodman et al., 2024	38352337	Sleep (SHS-PC3)	GWAS	UKB	413904	TBX6
Goodman et al., 2024	38352337	Sleep (SHS-PC3)	GWAS	UKB	413904	MYBPC3
Goodman et al., 2024	38352337	Sleep (SHS-PC3)	GWAS	UKB	413904	DOLPP1
Goodman et al., 2024	38352337	Sleep (SHS-PC3)	GWAS	UKB	413904	HSPE1-MOB4
Goodman et al., 2024	38352337	Sleep (SHS-PC3)	GWAS	UKB	413904	PACS1
Goodman et al., 2024	38352337	Sleep (SHS-PC3)	GWAS	UKB	413904	HERC4
Goodman et al., 2024	38352337	Sleep (SHS-PC3)	GWAS	UKB	413904	SKAP1
Goodman et al., 2024	38352337	Sleep (SHS-PC3)	GWAS	UKB	413904	RP11-481A20.11
Goodman et al., 2024	38352337	Sleep (SHS-PC3)	GWAS	UKB	413904	CRY1
Goodman et al., 2024	38352337	Sleep (SHS-PC3)	GWAS	UKB	413904	PRICKLE4
Goodman et al., 2024	38352337	Sleep (SHS-PC3)	GWAS	UKB	413904	TET1
Goodman et al., 2024	38352337	Sleep (SHS-PC3)	GWAS	UKB	413904	HP
Goodman et al., 2024	38352337	Sleep (SHS-PC3)	GWAS	UKB	413904	PTCD1
Goodman et al., 2024	38352337	Sleep (SHS-PC3)	GWAS	UKB	413904	ATP5J2-PTCD1
Goodman et al., 2024	38352337	Sleep (SHS-PC3)	GWAS	UKB	413904	HYAL1
Goodman et al., 2024	38352337	Sleep (SHS-PC3)	GWAS	UKB	413904	IQCA1
Goodman et al., 2024	38352337	Sleep (SHS-PC3)	GWAS	UKB	413904	A2M
Goodman et al., 2024	38352337	Sleep (SHS-PC3)	GWAS	UKB	413904	PPP2R4
Goodman et al., 2024	38352337	Sleep (SHS-PC3)	GWAS	UKB	413904	NOL4
Goodman et al., 2024	38352337	Sleep (SHS-PC3)	GWAS	UKB	413904	DOC2A
Goodman et al., 2024	38352337	Sleep (SHS-PC3)	GWAS	UKB	413904	ILF3
Goodman et al., 2024	38352337	Sleep (SHS-PC3)	GWAS	UKB	413904	FBXO5
Goodman et al., 2024	38352337	Sleep (SHS-PC3)	GWAS	UKB	413904	IKZF1
Goodman et al., 2024	38352337	Sleep (SHS-PC3)	GWAS	UKB	413904	DEFB134
Goodman et al., 2024	38352337	Sleep (SHS-PC3)	GWAS	UKB	413904	RABGAP1L
Goodman et al., 2024	38352337	Sleep (SHS-PC3)	GWAS	UKB	413904	LRWD1
Goodman et al., 2024	38352337	Sleep (SHS-PC3)	GWAS	UKB	413904	FAM69A
Goodman et al., 2024	38352337	Sleep (SHS-PC3)	GWAS	UKB	413904	THRA
Goodman et al., 2024	38352337	Sleep (SHS-PC3)	GWAS	UKB	413904	AGPAT4
Goodman et al., 2024	38352337	Sleep (SHS-PC4)	GWAS	UKB	413904	STH
Goodman et al., 2024	38352337	Sleep (SHS-PC4)	GWAS	UKB	413904	SPPL2C
Goodman et al., 2024	38352337	Sleep (SHS-PC4)	GWAS	UKB	413904	PLEKHM1
Goodman et al., 2024	38352337	Sleep (SHS-PC4)	GWAS	UKB	413904	CRHR1
Goodman et al., 2024	38352337	Sleep (SHS-PC4)	GWAS	UKB	413904	MAPT
Goodman et al., 2024	38352337	Sleep (SHS-PC4)	GWAS	UKB	413904	NSF
Goodman et al., 2024	38352337	Sleep (SHS-PC4)	GWAS	UKB	413904	KANSL1
Goodman et al., 2024	38352337	Sleep (SHS-PC4)	GWAS	UKB	413904	ARHGAP27
Goodman et al., 2024	38352337	Sleep (SHS-PC4)	GWAS	UKB	413904	ARL17B
Goodman et al., 2024	38352337	Sleep (SHS-PC4)	GWAS	UKB	413904	WNT3
Goodman et al., 2024	38352337	Sleep (SHS-PC4)	GWAS	UKB	413904	FTO
Goodman et al., 2024	38352337	Sleep (SHS-PC4)	GWAS	UKB	413904	ERBB4
Goodman et al., 2024	38352337	Sleep (SHS-PC4)	GWAS	UKB	413904	SIL1
Goodman et al., 2024	38352337	Sleep (SHS-PC4)	GWAS	UKB	413904	KSR2
Goodman et al., 2024	38352337	Sleep (SHS-PC4)	GWAS	UKB	413904	MSRB3
Goodman et al., 2024	38352337	Sleep (SHS-PC4)	GWAS	UKB	413904	KCNJ12
Goodman et al., 2024	38352337	Sleep (SHS-PC4)	GWAS	UKB	413904	TRIM13
Goodman et al., 2024	38352337	Sleep (SHS-PC4)	GWAS	UKB	413904	SYPL2
Goodman et al., 2024	38352337	Sleep (SHS-PC4)	GWAS	UKB	413904	SCAF8
Goodman et al., 2024	38352337	Sleep (SHS-PC4)	GWAS	UKB	413904	CYB561D1
Goodman et al., 2024	38352337	Sleep (SHS-PC4)	GWAS	UKB	413904	SPRYD7
Goodman et al., 2024	38352337	Sleep (SHS-PC4)	GWAS	UKB	413904	CDH2
Goodman et al., 2024	38352337	Sleep (SHS-PC4)	GWAS	UKB	413904	RTN4RL1
Goodman et al., 2024	38352337	Sleep (SHS-PC4)	GWAS	UKB	413904	MYBPHL
Goodman et al., 2024	38352337	Sleep (SHS-PC4)	GWAS	UKB	413904	DLEU1
Goodman et al., 2024	38352337	Sleep (SHS-PC4)	GWAS	UKB	413904	IMPDH2
Goodman et al., 2024	38352337	Sleep (SHS-PC4)	GWAS	UKB	413904	ATXN7L2
Goodman et al., 2024	38352337	Sleep (SHS-PC4)	GWAS	UKB	413904	AMIGO1
Goodman et al., 2024	38352337	Sleep (SHS-PC4)	GWAS	UKB	413904	HIC1
Goodman et al., 2024	38352337	Sleep (SHS-PC4)	GWAS	UKB	413904	TNFSF13
Goodman et al., 2024	38352337	Sleep (SHS-PC4)	GWAS	UKB	413904	RASGEF1C
Goodman et al., 2024	38352337	Sleep (SHS-PC4)	GWAS	UKB	413904	PSMA5
Goodman et al., 2024	38352337	Sleep (SHS-PC4)	GWAS	UKB	413904	PTPRG
Goodman et al., 2024	38352337	Sleep (SHS-PC4)	GWAS	UKB	413904	C5orf30
Goodman et al., 2024	38352337	Sleep (SHS-PC4)	GWAS	UKB	413904	SORT1
Goodman et al., 2024	38352337	Sleep (SHS-PC4)	GWAS	UKB	413904	KCNRG
Goodman et al., 2024	38352337	Sleep (SHS-PC4)	GWAS	UKB	413904	POC5
Goodman et al., 2024	38352337	Sleep (SHS-PC5)	GWAS	UKB	413904	SGCZ
Goodman et al., 2024	38352337	Sleep (SHS-PC5)	GWAS	UKB	413904	STAG1
Goodman et al., 2024	38352337	Sleep (SHS-PC5)	GWAS	UKB	413904	DRD2
Goodman et al., 2024	38352337	Sleep (SHS-PC5)	GWAS	UKB	413904	PCCB
Goodman et al., 2024	38352337	Sleep (SHS-PC5)	GWAS	UKB	413904	VRK2
Goodman et al., 2024	38352337	Sleep (SHS-PC5)	GWAS	UKB	413904	MSL2
Goodman et al., 2024	38352337	Sleep (SHS-PC5)	GWAS	UKB	413904	KCNQ5
Goodman et al., 2024	38352337	Sleep (SHS-PC5)	GWAS	UKB	413904	ZCCHC7
Goodman et al., 2024	38352337	Sleep (SHS-PC5)	GWAS	UKB	413904	MSRA
Goodman et al., 2024	38352337	Sleep (SHS-PC5)	GWAS	UKB	413904	PPP2R3A
Goodman et al., 2024	38352337	Sleep (SHS-PC5)	GWAS	UKB	413904	AS3MT
Goodman et al., 2024	38352337	Sleep (SHS-PC5)	GWAS	UKB	413904	C10orf32-ASMT
Goodman et al., 2024	38352337	Sleep (SHS-PC5)	GWAS	UKB	413904	APOE
Goodman et al., 2024	38352337	Sleep (SHS-PC5)	GWAS	UKB	413904	MAP2K5
Goodman et al., 2024	38352337	Sleep (SHS-PC5)	GWAS	UKB	413904	ANKK1
Goodman et al., 2024	38352337	Sleep (SHS-PC5)	GWAS	UKB	413904	ZNF446
Goodman et al., 2024	38352337	Sleep (SHS-PC5)	GWAS	UKB	413904	OLFM2
Goodman et al., 2024	38352337	Sleep (SHS-PC5)	GWAS	UKB	413904	SKOR1
Goodman et al., 2024	38352337	Sleep (SHS-PC5)	GWAS	UKB	413904	NOVA1
Goodman et al., 2024	38352337	Sleep (SHS-PC5)	GWAS	UKB	413904	ACBD4
Goodman et al., 2024	38352337	Sleep (SHS-PC5)	GWAS	UKB	413904	AUTS2
Goodman et al., 2024	38352337	Sleep (SHS-PC5)	GWAS	UKB	413904	ZBTB45
Goodman et al., 2024	38352337	Sleep (SHS-PC5)	GWAS	UKB	413904	KLF7
Goodman et al., 2024	38352337	Sleep (SHS-PC5)	GWAS	UKB	413904	APOC1
Goodman et al., 2024	38352337	Sleep (SHS-PC5)	GWAS	UKB	413904	TTC12
Goodman et al., 2024	38352337	Sleep (SHS-PC5)	GWAS	UKB	413904	CACNA1H
Goodman et al., 2024	38352337	Sleep (SHS-PC5)	GWAS	UKB	413904	SLC27A5
Friligkou et al., 2024	38405718	Anxiety	GWAS	AoU, FinnGen, iPSYCH, MVP, PGC, UKB - (EUR only)	1096458	MED19
Friligkou et al., 2024	38405718	Anxiety	GWAS	AoU, FinnGen, iPSYCH, MVP, PGC, UKB - (EUR only)	1096458	LINC01360
Friligkou et al., 2024	38405718	Anxiety	GWAS	AoU, FinnGen, iPSYCH, MVP, PGC, UKB - (EUR only)	1096458	GPANK1
Friligkou et al., 2024	38405718	Anxiety	GWAS	AoU, FinnGen, iPSYCH, MVP, PGC, UKB - (EUR only)	1096458	MSH5
Friligkou et al., 2024	38405718	Anxiety	GWAS	AoU, FinnGen, iPSYCH, MVP, PGC, UKB - (EUR only)	1096458	ANKK1
Friligkou et al., 2024	38405718	Anxiety	GWAS	AoU, FinnGen, iPSYCH, MVP, PGC, UKB - (EUR only)	1096458	C6orf48
Friligkou et al., 2024	38405718	Anxiety	GWAS	AoU, FinnGen, iPSYCH, MVP, PGC, UKB - (EUR only)	1096458	SELENOH
Friligkou et al., 2024	38405718	Anxiety	GWAS	AoU, FinnGen, iPSYCH, MVP, PGC, UKB - (EUR only)	1096458	MICB
Friligkou et al., 2024	38405718	Anxiety	GWAS	AoU, FinnGen, iPSYCH, MVP, PGC, UKB - (EUR only)	1096458	VARS
Friligkou et al., 2024	38405718	Anxiety	GWAS	AoU, FinnGen, iPSYCH, MVP, PGC, UKB - (EUR only)	1096458	CTD-2334D19.1
Friligkou et al., 2024	38405718	Anxiety	GWAS	AoU, FinnGen, iPSYCH, MVP, PGC, UKB - (EUR only)	1096458	SLC12A5
Friligkou et al., 2024	38405718	Anxiety	GWAS	AoU, FinnGen, iPSYCH, MVP, PGC, UKB - (EUR only)	1096458	TMX2
Friligkou et al., 2024	38405718	Anxiety	GWAS	AoU, FinnGen, iPSYCH, MVP, PGC, UKB - (EUR only)	1096458	STK24
Friligkou et al., 2024	38405718	Anxiety	GWAS	AoU, FinnGen, iPSYCH, MVP, PGC, UKB - (EUR only)	1096458	SAPCD1
Friligkou et al., 2024	38405718	Anxiety	GWAS	AoU, FinnGen, iPSYCH, MVP, PGC, UKB - (EUR only)	1096458	CYP21A2
Friligkou et al., 2024	38405718	Anxiety	GWAS	AoU, FinnGen, iPSYCH, MVP, PGC, UKB - (EUR only)	1096458	C2
Friligkou et al., 2024	38405718	Anxiety	GWAS	AoU, FinnGen, iPSYCH, MVP, PGC, UKB - (EUR only)	1096458	SMIM4
Friligkou et al., 2024	38405718	Anxiety	GWAS	AoU, FinnGen, iPSYCH, MVP, PGC, UKB - (EUR only)	1096458	CTNND1
Friligkou et al., 2024	38405718	Anxiety	GWAS	AoU, FinnGen, iPSYCH, MVP, PGC, UKB - (EUR only)	1096458	HSPA5
Friligkou et al., 2024	38405718	Anxiety	GWAS	AoU, FinnGen, iPSYCH, MVP, PGC, UKB - (EUR only)	1096458	HIST1H4I
Friligkou et al., 2024	38405718	Anxiety	GWAS	AoU, FinnGen, iPSYCH, MVP, PGC, UKB - (EUR only)	1096458	EHMT2
Friligkou et al., 2024	38405718	Anxiety	GWAS	AoU, FinnGen, iPSYCH, MVP, PGC, UKB - (EUR only)	1096458	DDAH2
Friligkou et al., 2024	38405718	Anxiety	GWAS	AoU, FinnGen, iPSYCH, MVP, PGC, UKB - (EUR only)	1096458	DRD2
Friligkou et al., 2024	38405718	Anxiety	GWAS	AoU, FinnGen, iPSYCH, MVP, PGC, UKB - (EUR only)	1096458	IP6K1
Friligkou et al., 2024	38405718	Anxiety	GWAS	AoU, FinnGen, iPSYCH, MVP, PGC, UKB - (EUR only)	1096458	NCOA5
Friligkou et al., 2024	38405718	Anxiety	GWAS	AoU, FinnGen, iPSYCH, MVP, PGC, UKB - (EUR only)	1096458	NICN1
Friligkou et al., 2024	38405718	Anxiety	GWAS	AoU, FinnGen, iPSYCH, MVP, PGC, UKB - (EUR only)	1096458	NT5DC2
Friligkou et al., 2024	38405718	Anxiety	GWAS	AoU, FinnGen, iPSYCH, MVP, PGC, UKB - (EUR only)	1096458	PLCL2
Friligkou et al., 2024	38405718	Anxiety	GWAS	AoU, FinnGen, iPSYCH, MVP, PGC, UKB - (EUR only)	1096458	CDHR4
Friligkou et al., 2024	38405718	Anxiety	GWAS	AoU, FinnGen, iPSYCH, MVP, PGC, UKB - (EUR only)	1096458	RAB27B
Friligkou et al., 2024	38405718	Anxiety	GWAS	AoU, FinnGen, iPSYCH, MVP, PGC, UKB - (EUR only)	1096458	RP11-6N13.1
Friligkou et al., 2024	38405718	Anxiety	GWAS	AoU, FinnGen, iPSYCH, MVP, PGC, UKB - (EUR only)	1096458	LINC01623
Friligkou et al., 2024	38405718	Anxiety	GWAS	AoU, FinnGen, iPSYCH, MVP, PGC, UKB - (EUR only)	1096458	NEK4
Friligkou et al., 2024	38405718	Anxiety	GWAS	AoU, FinnGen, iPSYCH, MVP, PGC, UKB - (EUR only)	1096458	CD40
Friligkou et al., 2024	38405718	Anxiety	GWAS	AoU, FinnGen, iPSYCH, MVP, PGC, UKB - (EUR only)	1096458	BTN2A1
Friligkou et al., 2024	38405718	Anxiety	GWAS	AoU, FinnGen, iPSYCH, MVP, PGC, UKB - (EUR only)	1096458	ZDHHC5
Friligkou et al., 2024	38405718	Anxiety	GWAS	AoU, FinnGen, iPSYCH, MVP, PGC, UKB - (EUR only)	1096458	FAM212A
Friligkou et al., 2024	38405718	Anxiety	GWAS	AoU, FinnGen, iPSYCH, MVP, PGC, UKB - (EUR only)	1096458	PBRM1
Friligkou et al., 2024	38405718	Anxiety	GWAS	AoU, FinnGen, iPSYCH, MVP, PGC, UKB - (EUR only)	1096458	ZBTB12
Friligkou et al., 2024	38405718	Anxiety	GWAS	AoU, FinnGen, iPSYCH, MVP, PGC, UKB - (EUR only)	1096458	GLT8D1
Friligkou et al., 2024	38405718	Anxiety	GWAS	AoU, FinnGen, iPSYCH, MVP, PGC, UKB - (EUR only)	1096458	PRSS16
Friligkou et al., 2024	38405718	Anxiety	GWAS	AoU, FinnGen, iPSYCH, MVP, PGC, UKB - (EUR only)	1096458	C17orf58
Friligkou et al., 2024	38405718	Anxiety	GWAS	AoU, FinnGen, iPSYCH, MVP, PGC, UKB - (EUR only)	1096458	CTA-14H9.5
Friligkou et al., 2024	38405718	Anxiety	TWAS	AoU, FinnGen, iPSYCH, MVP, PGC, UKB - (EUR only)	1096458	DNAH1
Friligkou et al., 2024	38405718	Anxiety	TWAS	AoU, FinnGen, iPSYCH, MVP, PGC, UKB - (EUR only)	1096458	PPP6C
Friligkou et al., 2024	38405718	Anxiety	TWAS	AoU, FinnGen, iPSYCH, MVP, PGC, UKB - (EUR only)	1096458	ZSCAN9
Friligkou et al., 2024	38405718	Anxiety	TWAS	AoU, FinnGen, iPSYCH, MVP, PGC, UKB - (EUR only)	1096458	CELF1
Friligkou et al., 2024	38405718	Anxiety	TWAS	AoU, FinnGen, iPSYCH, MVP, PGC, UKB - (EUR only)	1096458	PPM1M
Friligkou et al., 2024	38405718	Anxiety	TWAS	AoU, FinnGen, iPSYCH, MVP, PGC, UKB - (EUR only)	1096458	WDR82
Friligkou et al., 2024	38405718	Anxiety	TWAS	AoU, FinnGen, iPSYCH, MVP, PGC, UKB - (EUR only)	1096458	CNNM2
Friligkou et al., 2024	38405718	Anxiety	TWAS	AoU, FinnGen, iPSYCH, MVP, PGC, UKB - (EUR only)	1096458	FURIN
Friligkou et al., 2024	38405718	Anxiety	TWAS	AoU, FinnGen, iPSYCH, MVP, PGC, UKB - (EUR only)	1096458	CSNK2B
Friligkou et al., 2024	38405718	Anxiety	TWAS	AoU, FinnGen, iPSYCH, MVP, PGC, UKB - (EUR only)	1096458	TWF2
Friligkou et al., 2024	38405718	Anxiety	TWAS	AoU, FinnGen, iPSYCH, MVP, PGC, UKB - (EUR only)	1096458	HCG11
Friligkou et al., 2024	38405718	Anxiety	TWAS	AoU, FinnGen, iPSYCH, MVP, PGC, UKB - (EUR only)	1096458	GLYCTK
Friligkou et al., 2024	38405718	Anxiety	TWAS	AoU, FinnGen, iPSYCH, MVP, PGC, UKB - (EUR only)	1096458	IGSF9B
Friligkou et al., 2024	38405718	Anxiety	TWAS	AoU, FinnGen, iPSYCH, MVP, PGC, UKB - (EUR only)	1096458	RP11-384F7.2
Friligkou et al., 2024	38405718	Anxiety	TWAS	AoU, FinnGen, iPSYCH, MVP, PGC, UKB - (EUR only)	1096458	CELF4
Friligkou et al., 2024	38405718	Anxiety	TWAS	AoU, FinnGen, iPSYCH, MVP, PGC, UKB - (EUR only)	1096458	YPEL4
Friligkou et al., 2024	38405718	Anxiety	TWAS	AoU, FinnGen, iPSYCH, MVP, PGC, UKB - (EUR only)	1096458	SCAI
Friligkou et al., 2024	38405718	Anxiety	TWAS	AoU, FinnGen, iPSYCH, MVP, PGC, UKB - (EUR only)	1096458	SEMA3F
Friligkou et al., 2024	38405718	Anxiety	TWAS	AoU, FinnGen, iPSYCH, MVP, PGC, UKB - (EUR only)	1096458	UBA7
Friligkou et al., 2024	38405718	Anxiety	TWAS	AoU, FinnGen, iPSYCH, MVP, PGC, UKB - (EUR only)	1096458	GNL3
Friligkou et al., 2024	38405718	Anxiety	TWAS	AoU, FinnGen, iPSYCH, MVP, PGC, UKB - (EUR only)	1096458	ITIH1
Friligkou et al., 2024	38405718	Anxiety	TWAS	AoU, FinnGen, iPSYCH, MVP, PGC, UKB - (EUR only)	1096458	ITIH3
Friligkou et al., 2024	38405718	Anxiety	TWAS	AoU, FinnGen, iPSYCH, MVP, PGC, UKB - (EUR only)	1096458	TMEM214
Friligkou et al., 2024	38405718	Anxiety	TWAS	AoU, FinnGen, iPSYCH, MVP, PGC, UKB - (EUR only)	1096458	CLP1
Friligkou et al., 2024	38405718	Anxiety	TWAS	AoU, FinnGen, iPSYCH, MVP, PGC, UKB - (EUR only)	1096458	RNF123
Friligkou et al., 2024	38405718	Anxiety	TWAS	AoU, FinnGen, iPSYCH, MVP, PGC, UKB - (EUR only)	1096458	LRFN5
Friligkou et al., 2024	38405718	Anxiety	TWAS	AoU, FinnGen, iPSYCH, MVP, PGC, UKB - (EUR only)	1096458	AGBL5
Friligkou et al., 2024	38405718	Anxiety	TWAS	AoU, FinnGen, iPSYCH, MVP, PGC, UKB - (EUR only)	1096458	TLR9
Friligkou et al., 2024	38405718	Anxiety	TWAS	AoU, FinnGen, iPSYCH, MVP, PGC, UKB - (EUR only)	1096458	BTN3A1
Friligkou et al., 2024	38405718	Anxiety	TWAS	AoU, FinnGen, iPSYCH, MVP, PGC, UKB - (EUR only)	1096458	TFAP2B
Friligkou et al., 2024	38405718	Anxiety	TWAS	AoU, FinnGen, iPSYCH, MVP, PGC, UKB - (EUR only)	1096458	RABEPK
Friligkou et al., 2024	38405718	Anxiety	TWAS	AoU, FinnGen, iPSYCH, MVP, PGC, UKB - (EUR only)	1096458	KHK
Friligkou et al., 2024	38405718	Anxiety	TWAS	AoU, FinnGen, iPSYCH, MVP, PGC, UKB - (EUR only)	1096458	PDE4B
Friligkou et al., 2024	38405718	Anxiety	TWAS	AoU, FinnGen, iPSYCH, MVP, PGC, UKB - (EUR only)	1096458	FAM180B
Friligkou et al., 2024	38405718	Anxiety	TWAS	AoU, FinnGen, iPSYCH, MVP, PGC, UKB - (EUR only)	1096458	HIST1H2BK
Friligkou et al., 2024	38405718	Anxiety	TWAS	AoU, FinnGen, iPSYCH, MVP, PGC, UKB - (EUR only)	1096458	YLPM1
Friligkou et al., 2024	38405718	Anxiety	TWAS	AoU, FinnGen, iPSYCH, MVP, PGC, UKB - (EUR only)	1096458	ZNF184
Friligkou et al., 2024	38405718	Anxiety	TWAS	AoU, FinnGen, iPSYCH, MVP, PGC, UKB - (EUR only)	1096458	HIST1H2AJ
Friligkou et al., 2024	38405718	Anxiety	TWAS	AoU, FinnGen, iPSYCH, MVP, PGC, UKB - (EUR only)	1096458	XXbac-BPG248L24.13
Friligkou et al., 2024	38405718	Anxiety	TWAS	AoU, FinnGen, iPSYCH, MVP, PGC, UKB - (EUR only)	1096458	CTB-31N19.5
Friligkou et al., 2024	38405718	Anxiety	TWAS	AoU, FinnGen, iPSYCH, MVP, PGC, UKB - (EUR only)	1096458	AREL1
Friligkou et al., 2024	38405718	Anxiety	TWAS	AoU, FinnGen, iPSYCH, MVP, PGC, UKB - (EUR only)	1096458	MADD
Friligkou et al., 2024	38405718	Anxiety	TWAS	AoU, FinnGen, iPSYCH, MVP, PGC, UKB - (EUR only)	1096458	ZBTB22
Friligkou et al., 2024	38405718	Anxiety	TWAS	AoU, FinnGen, iPSYCH, MVP, PGC, UKB - (EUR only)	1096458	AC145343.2
Friligkou et al., 2024	38405718	Anxiety	TWAS	AoU, FinnGen, iPSYCH, MVP, PGC, UKB - (EUR only)	1096458	LINC01012
Friligkou et al., 2024	38405718	Anxiety	TWAS	AoU, FinnGen, iPSYCH, MVP, PGC, UKB - (EUR only)	1096458	MAPRE3
Friligkou et al., 2024	38405718	Anxiety	TWAS	AoU, FinnGen, iPSYCH, MVP, PGC, UKB - (EUR only)	1096458	OST4
Friligkou et al., 2024	38405718	Anxiety	TWAS	AoU, FinnGen, iPSYCH, MVP, PGC, UKB - (EUR only)	1096458	EMILIN1
Friligkou et al., 2024	38405718	Anxiety	TWAS	AoU, FinnGen, iPSYCH, MVP, PGC, UKB - (EUR only)	1096458	TRAF3
Friligkou et al., 2024	38405718	Anxiety	TWAS	AoU, FinnGen, iPSYCH, MVP, PGC, UKB - (EUR only)	1096458	FCF1
Friligkou et al., 2024	38405718	Anxiety	TWAS	AoU, FinnGen, iPSYCH, MVP, PGC, UKB - (EUR only)	1096458	FAM120A
Friligkou et al., 2024	38405718	Anxiety	TWAS	AoU, FinnGen, iPSYCH, MVP, PGC, UKB - (EUR only)	1096458	CTNND1
Friligkou et al., 2024	38405718	Anxiety	TWAS	AoU, FinnGen, iPSYCH, MVP, PGC, UKB - (EUR only)	1096458	CNNM2
Friligkou et al., 2024	38405718	Anxiety	TWAS	AoU, FinnGen, iPSYCH, MVP, PGC, UKB - (EUR only)	1096458	RAB27B
Friligkou et al., 2024	38405718	Anxiety	TWAS	AoU, FinnGen, iPSYCH, MVP, PGC, UKB - (EUR only)	1096458	KHK
Friligkou et al., 2024	38405718	Anxiety	TWAS	AoU, FinnGen, iPSYCH, MVP, PGC, UKB - (EUR only)	1096458	BTN2A1
Friligkou et al., 2024	38405718	Anxiety	TWAS	AoU, FinnGen, iPSYCH, MVP, PGC, UKB - (EUR only)	1096458	GPT
Friligkou et al., 2024	38405718	Anxiety	TWAS	AoU, FinnGen, iPSYCH, MVP, PGC, UKB - (EUR only)	1096458	GMPPB
Friligkou et al., 2024	38405718	Anxiety	TWAS	AoU, FinnGen, iPSYCH, MVP, PGC, UKB - (EUR only)	1096458	B3GALTL
Friligkou et al., 2024	38405718	Anxiety	TWAS	AoU, FinnGen, iPSYCH, MVP, PGC, UKB - (EUR only)	1096458	NEK4
Friligkou et al., 2024	38405718	Anxiety	TWAS	AoU, FinnGen, iPSYCH, MVP, PGC, UKB - (EUR only)	1096458	BTN3A3
Friligkou et al., 2024	38405718	Anxiety	TWAS	AoU, FinnGen, iPSYCH, MVP, PGC, UKB - (EUR only)	1096458	MKRN1
Friligkou et al., 2024	38405718	Anxiety	TWAS	AoU, FinnGen, iPSYCH, MVP, PGC, UKB - (EUR only)	1096458	CGREF1
Friligkou et al., 2024	38405718	Anxiety	TWAS	AoU, FinnGen, iPSYCH, MVP, PGC, UKB - (EUR only)	1096458	GPX1
Friligkou et al., 2024	38405718	Anxiety	TWAS	AoU, FinnGen, iPSYCH, MVP, PGC, UKB - (EUR only)	1096458	CCDC92
Friligkou et al., 2024	38405718	Anxiety	TWAS	AoU, FinnGen, iPSYCH, MVP, PGC, UKB - (EUR only)	1096458	SLC25A12
Friligkou et al., 2024	38405718	Anxiety	TWAS	AoU, FinnGen, iPSYCH, MVP, PGC, UKB - (EUR only)	1096458	FLOT2
Friligkou et al., 2024	38405718	Anxiety	TWAS	AoU, FinnGen, iPSYCH, MVP, PGC, UKB - (EUR only)	1096458	DPYSL5
Friligkou et al., 2024	38405718	Anxiety	TWAS	AoU, FinnGen, iPSYCH, MVP, PGC, UKB - (EUR only)	1096458	GDI2
Friligkou et al., 2024	38405718	Anxiety	TWAS	AoU, FinnGen, iPSYCH, MVP, PGC, UKB - (EUR only)	1096458	PLCG1
Friligkou et al., 2024	38405718	Anxiety	TWAS	AoU, FinnGen, iPSYCH, MVP, PGC, UKB - (EUR only)	1096458	TPBG
Friligkou et al., 2024	38405718	Anxiety	TWAS	AoU, FinnGen, iPSYCH, MVP, PGC, UKB - (EUR only)	1096458	PBXIP1
Friligkou et al., 2024	38405718	Anxiety	TWAS	AoU, FinnGen, iPSYCH, MVP, PGC, UKB - (EUR only)	1096458	DOC2A
Friligkou et al., 2024	38405718	Anxiety	TWAS	AoU, FinnGen, iPSYCH, MVP, PGC, UKB - (EUR only)	1096458	RAB5C
Friligkou et al., 2024	38405718	Anxiety	TWAS	AoU, FinnGen, iPSYCH, MVP, PGC, UKB - (EUR only)	1096458	PDE1A
Docherty et al., 2023	37777856	Suicide attempt	Meta-analysis of GWAS	UKB, PGC, iPSYCH, MVP, other (EUR)	518612	DRD2
Docherty et al., 2023	37777856	Suicide attempt	Meta-analysis of GWAS	UKB, PGC, iPSYCH, MVP, other (EUR)	518612	PDE4B
Docherty et al., 2023	37777856	Suicide attempt	Meta-analysis of GWAS	UKB, PGC, iPSYCH, MVP, other (EUR)	518612	DCC
Docherty et al., 2023	37777856	Suicide attempt	Meta-analysis of GWAS	UKB, PGC, iPSYCH, MVP, other (EUR)	518612	FURIN
Docherty et al., 2023	37777856	Suicide attempt	Meta-analysis of GWAS	UKB, PGC, iPSYCH, MVP, other (EUR)	518612	CACNG2
Docherty et al., 2023	37777856	Suicide attempt	Meta-analysis of GWAS	UKB, PGC, iPSYCH, MVP, other (EUR)	518612	ERC2
Docherty et al., 2023	37777856	Suicide attempt	Meta-analysis of GWAS	UKB, PGC, iPSYCH, MVP, other (EUR)	518612	TIAF1
Docherty et al., 2023	37777856	Suicide attempt	Meta-analysis of GWAS	UKB, PGC, iPSYCH, MVP, other (EUR)	518612	FES
Docherty et al., 2023	37777856	Suicide attempt	Meta-analysis of GWAS	UKB, PGC, iPSYCH, MVP, other (EUR)	518612	SERTAD4
Docherty et al., 2023	37777856	Suicide attempt	Meta-analysis of GWAS	UKB, PGC, iPSYCH, MVP, other (EUR)	518612	ANKK1
Docherty et al., 2023	37777856	Suicide attempt	Meta-analysis of GWAS	UKB, PGC, iPSYCH, MVP, other (EUR)	518612	TTC12
Docherty et al., 2023	37777856	Suicide attempt	Meta-analysis of GWAS	UKB, PGC, iPSYCH, MVP, other (EUR)	518612	PTBP2
Docherty et al., 2023	37777856	Suicide attempt	Meta-analysis of GWAS	UKB, PGC, iPSYCH, MVP, other (EUR)	518612	UBA7
Docherty et al., 2023	37777856	Suicide attempt	Meta-analysis of GWAS	UKB, PGC, iPSYCH, MVP, other (EUR)	518612	SEMA6D
Docherty et al., 2023	37777856	Suicide attempt	Meta-analysis of GWAS	UKB, PGC, iPSYCH, MVP, other (multi ancestry)	958896	DRD2
Docherty et al., 2023	37777856	Suicide attempt	Meta-analysis of GWAS	UKB, PGC, iPSYCH, MVP, other (multi ancestry)	958896	PDE4B
Docherty et al., 2023	37777856	Suicide attempt	Meta-analysis of GWAS	UKB, PGC, iPSYCH, MVP, other (multi ancestry)	958896	FURIN
Docherty et al., 2023	37777856	Suicide attempt	Meta-analysis of GWAS	UKB, PGC, iPSYCH, MVP, other (multi ancestry)	958896	ANKK1
Docherty et al., 2023	37777856	Suicide attempt	Meta-analysis of GWAS	UKB, PGC, iPSYCH, MVP, other (multi ancestry)	958896	DCC
Docherty et al., 2023	37777856	Suicide attempt	Meta-analysis of GWAS	UKB, PGC, iPSYCH, MVP, other (multi ancestry)	958896	ZFAND2B
Docherty et al., 2023	37777856	Suicide attempt	Meta-analysis of GWAS	UKB, PGC, iPSYCH, MVP, other (multi ancestry)	958896	AMIGO3
Docherty et al., 2023	37777856	Suicide attempt	Meta-analysis of GWAS	UKB, PGC, iPSYCH, MVP, other (multi ancestry)	958896	GMPPB
Docherty et al., 2023	37777856	Suicide attempt	Meta-analysis of GWAS	UKB, PGC, iPSYCH, MVP, other (multi ancestry)	958896	FES
Docherty et al., 2023	37777856	Suicide attempt	Meta-analysis of GWAS	UKB, PGC, iPSYCH, MVP, other (multi ancestry)	958896	CDHR4
Docherty et al., 2023	37777856	Suicide attempt	Meta-analysis of GWAS	UKB, PGC, iPSYCH, MVP, other (multi ancestry)	958896	TTC12
Docherty et al., 2023	37777856	Suicide attempt	Meta-analysis of GWAS	UKB, PGC, iPSYCH, MVP, other (multi ancestry)	958896	UBA7
Docherty et al., 2023	37777856	Suicide attempt	Meta-analysis of GWAS	UKB, PGC, iPSYCH, MVP, other (multi ancestry)	958896	HS6ST3
Docherty et al., 2023	37777856	Suicide attempt	Meta-analysis of GWAS	UKB, PGC, iPSYCH, MVP, other (multi ancestry)	958896	IPO13
Docherty et al., 2023	37777856	Suicide attempt	Meta-analysis of GWAS	UKB, PGC, iPSYCH, MVP, other (multi ancestry)	958896	ELAVL4
Docherty et al., 2023	37777856	Suicide attempt	Meta-analysis of GWAS	UKB, PGC, iPSYCH, MVP, other (multi ancestry)	958896	CACNG2
Docherty et al., 2023	37777856	Suicide attempt	Meta-analysis of GWAS	UKB, PGC, iPSYCH, MVP, other (multi ancestry)	958896	ERC2
Docherty et al., 2023	37777856	Suicide attempt	Meta-analysis of GWAS	UKB, PGC, iPSYCH, MVP, other (multi ancestry)	958896	PFKFB2
Docherty et al., 2023	37777856	Suicide attempt	Meta-analysis of GWAS	UKB, PGC, iPSYCH, MVP, other (multi ancestry)	958896	SGCD
Docherty et al., 2023	37777856	Suicide attempt	Meta-analysis of GWAS	UKB, PGC, iPSYCH, MVP, other (multi ancestry)	958896	SERTAD4
Docherty et al., 2023	37777856	Suicide attempt	Meta-analysis of GWAS	UKB, PGC, iPSYCH, MVP, other (multi ancestry)	958896	BTN2A1
Docherty et al., 2023	37777856	Suicide attempt	Meta-analysis of GWAS	UKB, PGC, iPSYCH, MVP, other (multi ancestry)	958896	CCDC24
Docherty et al., 2023	37777856	Suicide attempt	Meta-analysis of GWAS	UKB, PGC, iPSYCH, MVP, other (multi ancestry)	958896	ARTN
Hatoum et al., 2023	36150907	Executive functions	GWAS	UKB	427037	EXOC4
Hatoum et al., 2023	36150907	Executive functions	GWAS	UKB	427037	GRIN2A
Hatoum et al., 2023	36150907	Executive functions	GWAS	UKB	427037	RBFOX1
Hatoum et al., 2023	36150907	Executive functions	GWAS	UKB	427037	STAB1
Hatoum et al., 2023	36150907	Executive functions	GWAS	UKB	427037	LRP1B
Hatoum et al., 2023	36150907	Executive functions	GWAS	UKB	427037	SFMBT1
Hatoum et al., 2023	36150907	Executive functions	GWAS	UKB	427037	APOC1
Hatoum et al., 2023	36150907	Executive functions	GWAS	UKB	427037	ITIH4
Hatoum et al., 2023	36150907	Executive functions	GWAS	UKB	427037	TMEM110-MUSTN1
Hatoum et al., 2023	36150907	Executive functions	GWAS	UKB	427037	TMEM110
Hatoum et al., 2023	36150907	Executive functions	GWAS	UKB	427037	RP5-966M1.6
Hatoum et al., 2023	36150907	Executive functions	GWAS	UKB	427037	NT5DC2
Hatoum et al., 2023	36150907	Executive functions	GWAS	UKB	427037	CUL9
Hatoum et al., 2023	36150907	Executive functions	GWAS	UKB	427037	ITIH3
Hatoum et al., 2023	36150907	Executive functions	GWAS	UKB	427037	MUSTN1
Hatoum et al., 2023	36150907	Executive functions	GWAS	UKB	427037	FAM172A
Hatoum et al., 2023	36150907	Executive functions	GWAS	UKB	427037	APOE
Hatoum et al., 2023	36150907	Executive functions	GWAS	UKB	427037	PLEKHA1
Hatoum et al., 2023	36150907	Executive functions	GWAS	UKB	427037	SMIM4
Hatoum et al., 2023	36150907	Executive functions	GWAS	UKB	427037	SPCS1
Hatoum et al., 2023	36150907	Executive functions	GWAS	UKB	427037	GLT8D1
Hatoum et al., 2023	36150907	Executive functions	GWAS	UKB	427037	KCNAB2
Hatoum et al., 2023	36150907	Executive functions	GWAS	UKB	427037	GNL3
Hatoum et al., 2023	36150907	Executive functions	GWAS	UKB	427037	PBRM1
Hatoum et al., 2023	36150907	Executive functions	GWAS	UKB	427037	DRD2
Hatoum et al., 2023	36150907	Executive functions	GWAS	UKB	427037	ITIH1
Hatoum et al., 2023	36150907	Executive functions	GWAS	UKB	427037	NEK4
Hatoum et al., 2023	36150907	Executive functions	GWAS	UKB	427037	MEF2C
Hatoum et al., 2023	36150907	Executive functions	GWAS	UKB	427037	GRIA4
Hatoum et al., 2023	36150907	Executive functions	GWAS	UKB	427037	CNTNAP5
Hatoum et al., 2023	36150907	Executive functions	GWAS	UKB	427037	CTNNA2
Hatoum et al., 2023	36150907	Executive functions	GWAS	UKB	427037	PRKD1
Hatoum et al., 2023	36150907	Executive functions	GWAS	UKB	427037	EP300
Hatoum et al., 2023	36150907	Executive functions	GWAS	UKB	427037	RP11-894J14.5
Hatoum et al., 2023	36150907	Executive functions	GWAS	UKB	427037	KCNIP2
Hatoum et al., 2023	36150907	Executive functions	GWAS	UKB	427037	TTBK1
Hatoum et al., 2023	36150907	Executive functions	GWAS	UKB	427037	CNTNAP4
Hatoum et al., 2023	36150907	Executive functions	GWAS	UKB	427037	DCC
Hatoum et al., 2023	36150907	Executive functions	GWAS	UKB	427037	NICN1
Hatoum et al., 2023	36150907	Executive functions	GWAS	UKB	427037	TSNARE1
Hatoum et al., 2023	36150907	Executive functions	GWAS	UKB	427037	CSE1L
Hatoum et al., 2023	36150907	Executive functions	GWAS	UKB	427037	RANGAP1
Hatoum et al., 2023	36150907	Executive functions	GWAS	UKB	427037	C10orf32-ASMT
Hatoum et al., 2023	36150907	Executive functions	GWAS	UKB	427037	TSPAN14
Hatoum et al., 2023	36150907	Executive functions	GWAS	UKB	427037	TBC1D5
Hatoum et al., 2023	36150907	Executive functions	GWAS	UKB	427037	MST1
Hatoum et al., 2023	36150907	Executive functions	GWAS	UKB	427037	TCTA
Hatoum et al., 2023	36150907	Executive functions	GWAS	UKB	427037	ALMS1
Hatoum et al., 2023	36150907	Executive functions	GWAS	UKB	427037	BSN
Hatoum et al., 2023	36150907	Executive functions	GWAS	UKB	427037	RHOA
Hatoum et al., 2023	36150907	Executive functions	GWAS	UKB	427037	DAG1
Hatoum et al., 2023	36150907	Executive functions	GWAS	UKB	427037	C10orf76
Hatoum et al., 2023	36150907	Executive functions	GWAS	UKB	427037	C10orf32
Hatoum et al., 2023	36150907	Executive functions	GWAS	UKB	427037	DALRD3
Hatoum et al., 2023	36150907	Executive functions	GWAS	UKB	427037	L3MBTL2
Hatoum et al., 2023	36150907	Executive functions	GWAS	UKB	427037	ANKS1B
Hatoum et al., 2023	36150907	Executive functions	GWAS	UKB	427037	CPN1
Hatoum et al., 2023	36150907	Executive functions	GWAS	UKB	427037	QRICH1
Hatoum et al., 2023	36150907	Executive functions	GWAS	UKB	427037	NT5C2
Hatoum et al., 2023	36150907	Executive functions	GWAS	UKB	427037	AS3MT
Hatoum et al., 2023	36150907	Executive functions	GWAS	UKB	427037	CHADL
Hatoum et al., 2023	36150907	Executive functions	GWAS	UKB	427037	TMEM219
Hatoum et al., 2023	36150907	Executive functions	GWAS	UKB	427037	CNNM2
Hatoum et al., 2023	36150907	Executive functions	GWAS	UKB	427037	ARHGAP27
Hatoum et al., 2023	36150907	Executive functions	GWAS	UKB	427037	KIAA0825
Hatoum et al., 2023	36150907	Executive functions	GWAS	UKB	427037	MGEA5
Hatoum et al., 2023	36150907	Executive functions	GWAS	UKB	427037	DOC2A
Hatoum et al., 2023	36150907	Executive functions	GWAS	UKB	427037	TAOK2
Hatoum et al., 2023	36150907	Executive functions	GWAS	UKB	427037	PLEKHM1
Hatoum et al., 2023	36150907	Executive functions	GWAS	UKB	427037	ARFGEF2
Hatoum et al., 2023	36150907	Executive functions	GWAS	UKB	427037	TCF20
Hatoum et al., 2023	36150907	Executive functions	GWAS	UKB	427037	CYP17A1
Hatoum et al., 2023	36150907	Executive functions	GWAS	UKB	427037	SLC41A1
Hatoum et al., 2023	36150907	Executive functions	GWAS	UKB	427037	C3orf84
Hatoum et al., 2023	36150907	Executive functions	GWAS	UKB	427037	DNPH1
Hatoum et al., 2023	36150907	Executive functions	GWAS	UKB	427037	FBXO31
Hatoum et al., 2023	36150907	Executive functions	GWAS	UKB	427037	IP6K2
Hatoum et al., 2023	36150907	Executive functions	GWAS	UKB	427037	KIAA0556
Hatoum et al., 2023	36150907	Executive functions	GWAS	UKB	427037	EPHB1
Hatoum et al., 2023	36150907	Executive functions	GWAS	UKB	427037	FBXW4
Hatoum et al., 2023	36150907	Executive functions	GWAS	UKB	427037	DARS
Hatoum et al., 2023	36150907	Executive functions	GWAS	UKB	427037	RIMS4
Hatoum et al., 2023	36150907	Executive functions	GWAS	UKB	427037	TLR9
Hatoum et al., 2023	36150907	Executive functions	GWAS	UKB	427037	TBX6
Hatoum et al., 2023	36150907	Executive functions	GWAS	UKB	427037	ALDOA
Hatoum et al., 2023	36150907	Executive functions	GWAS	UKB	427037	ARMS2
Hatoum et al., 2023	36150907	Executive functions	GWAS	UKB	427037	WNT3
Hatoum et al., 2023	36150907	Executive functions	GWAS	UKB	427037	APEH
Hatoum et al., 2023	36150907	Executive functions	GWAS	UKB	427037	FAM57B
Hatoum et al., 2023	36150907	Executive functions	GWAS	UKB	427037	TMEM170B
Hatoum et al., 2023	36150907	Executive functions	GWAS	UKB	427037	GATAD2B
Hatoum et al., 2023	36150907	Executive functions	GWAS	UKB	427037	GPR75-ASB3
Hatoum et al., 2023	36150907	Executive functions	GWAS	UKB	427037	TOMM40
Hatoum et al., 2023	36150907	Executive functions	GWAS	UKB	427037	CPLX1
Hatoum et al., 2023	36150907	Executive functions	GWAS	UKB	427037	GTF3C1
Hatoum et al., 2023	36150907	Executive functions	GWAS	UKB	427037	STH
Hatoum et al., 2023	36150907	Executive functions	GWAS	UKB	427037	DPYD
Hatoum et al., 2023	36150907	Executive functions	GWAS	UKB	427037	CCDC36
Hatoum et al., 2023	36150907	Executive functions	GWAS	UKB	427037	FAM19A5
Hatoum et al., 2023	36150907	Executive functions	GWAS	UKB	427037	GPX1
Hatoum et al., 2023	36150907	Executive functions	GWAS	UKB	427037	VRK2
Hatoum et al., 2023	36150907	Executive functions	GWAS	UKB	427037	MCM6
Hatoum et al., 2023	36150907	Executive functions	GWAS	UKB	427037	SRF
Hatoum et al., 2023	36150907	Executive functions	GWAS	UKB	427037	NCAM1
Hatoum et al., 2023	36150907	Executive functions	GWAS	UKB	427037	SLC39A1
Hatoum et al., 2023	36150907	Executive functions	GWAS	UKB	427037	BLOC1S2
Hatoum et al., 2023	36150907	Executive functions	GWAS	UKB	427037	EXT1
Hatoum et al., 2023	36150907	Executive functions	GWAS	UKB	427037	USP4
Hatoum et al., 2023	36150907	Executive functions	GWAS	UKB	427037	DUSP11
Hatoum et al., 2023	36150907	Executive functions	GWAS	UKB	427037	MAST4
Hatoum et al., 2023	36150907	Executive functions	GWAS	UKB	427037	STT3B
Hatoum et al., 2023	36150907	Executive functions	GWAS	UKB	427037	NSF
Hatoum et al., 2023	36150907	Executive functions	GWAS	UKB	427037	LCT
Hatoum et al., 2023	36150907	Executive functions	GWAS	UKB	427037	PTK7
Hatoum et al., 2023	36150907	Executive functions	GWAS	UKB	427037	KCNJ3
Hatoum et al., 2023	36150907	Executive functions	GWAS	UKB	427037	GABRB1
Hatoum et al., 2023	36150907	Executive functions	GWAS	UKB	427037	DYDC2
Hatoum et al., 2023	36150907	Executive functions	GWAS	UKB	427037	KCTD13
Hatoum et al., 2023	36150907	Executive functions	GWAS	UKB	427037	NPM3
Hatoum et al., 2023	36150907	Executive functions	GWAS	UKB	427037	TCF4
Hatoum et al., 2023	36150907	Executive functions	GWAS	UKB	427037	C3orf62
Hatoum et al., 2023	36150907	Executive functions	GWAS	UKB	427037	MAPT
Hatoum et al., 2023	36150907	Executive functions	GWAS	UKB	427037	ABCC2
Hatoum et al., 2023	36150907	Executive functions	GWAS	UKB	427037	RAB11FIP5
Hatoum et al., 2023	36150907	Executive functions	GWAS	UKB	427037	CRHR1
Hatoum et al., 2023	36150907	Executive functions	GWAS	UKB	427037	SEMA3G
Hatoum et al., 2023	36150907	Executive functions	GWAS	UKB	427037	DYDC1
Hatoum et al., 2023	36150907	Executive functions	GWAS	UKB	427037	DENND4B
Hatoum et al., 2023	36150907	Executive functions	GWAS	UKB	427037	TRIM9
Hatoum et al., 2023	36150907	Executive functions	GWAS	UKB	427037	C16orf92
Hatoum et al., 2023	36150907	Executive functions	GWAS	UKB	427037	C2orf78
Hatoum et al., 2023	36150907	Executive functions	GWAS	UKB	427037	VKORC1
Hatoum et al., 2023	36150907	Executive functions	GWAS	UKB	427037	SGCZ
Hatoum et al., 2023	36150907	Executive functions	GWAS	UKB	427037	SPPL2C
Hatoum et al., 2023	36150907	Executive functions	GWAS	UKB	427037	SMG7
Hatoum et al., 2023	36150907	Executive functions	GWAS	UKB	427037	DPP4
Hatoum et al., 2023	36150907	Executive functions	GWAS	UKB	427037	SSBP2
Hatoum et al., 2023	36150907	Executive functions	GWAS	UKB	427037	PM20D1
Hatoum et al., 2023	36150907	Executive functions	GWAS	UKB	427037	RNF123
Hatoum et al., 2023	36150907	Executive functions	GWAS	UKB	427037	LMOD1
Hatoum et al., 2023	36150907	Executive functions	GWAS	UKB	427037	PHF7
Hatoum et al., 2023	36150907	Executive functions	GWAS	UKB	427037	TMIGD1
Hatoum et al., 2023	36150907	Executive functions	GWAS	UKB	427037	PSME4
Hatoum et al., 2023	36150907	Executive functions	GWAS	UKB	427037	ESRRG
Hatoum et al., 2023	36150907	Executive functions	GWAS	UKB	427037	NR2F1
Hatoum et al., 2023	36150907	Executive functions	GWAS	UKB	427037	IPO9
Hatoum et al., 2023	36150907	Executive functions	GWAS	UKB	427037	CAMKV
Hatoum et al., 2023	36150907	Executive functions	GWAS	UKB	427037	43711
Hatoum et al., 2023	36150907	Executive functions	GWAS	UKB	427037	ARL17B
Hatoum et al., 2023	36150907	Executive functions	GWAS	UKB	427037	KANSL1
Hatoum et al., 2023	36150907	Executive functions	GWAS	UKB	427037	TMTC4
Hatoum et al., 2023	36150907	Executive functions	GWAS	UKB	427037	TMEM163
Hatoum et al., 2023	36150907	Executive functions	GWAS	UKB	427037	POU5F2
Hatoum et al., 2023	36150907	Executive functions	GWAS	UKB	427037	CRTC2
Hatoum et al., 2023	36150907	Executive functions	GWAS	UKB	427037	UBXN4
Hatoum et al., 2023	36150907	Executive functions	GWAS	UKB	427037	DPCD
Hatoum et al., 2023	36150907	Executive functions	GWAS	UKB	427037	ASPHD1
Hatoum et al., 2023	36150907	Executive functions	GWAS	UKB	427037	THSD7B
Hatoum et al., 2023	36150907	Executive functions	GWAS	UKB	427037	WBP2NL
Hatoum et al., 2023	36150907	Executive functions	GWAS	UKB	427037	PEF1
Hatoum et al., 2023	36150907	Executive functions	GWAS	UKB	427037	SLC8A1
Hatoum et al., 2023	36150907	Executive functions	GWAS	UKB	427037	C4orf21
Hatoum et al., 2023	36150907	Executive functions	GWAS	UKB	427037	MAP1LC3B
Hatoum et al., 2023	36150907	Executive functions	GWAS	UKB	427037	STAU1
Hatoum et al., 2023	36150907	Executive functions	GWAS	UKB	427037	HIST1H4G
Hatoum et al., 2023	36150907	Executive functions	GWAS	UKB	427037	KAT8
Hatoum et al., 2023	36150907	Executive functions	GWAS	UKB	427037	NMRK1
Hatoum et al., 2023	36150907	Executive functions	GWAS	UKB	427037	COX7B2
Hatoum et al., 2023	36150907	Executive functions	GWAS	UKB	427037	AMT
Hatoum et al., 2023	36150907	Executive functions	GWAS	UKB	427037	GOSR1
Hatoum et al., 2023	36150907	Executive functions	GWAS	UKB	427037	INO80E
Hatoum et al., 2023	36150907	Executive functions	GWAS	UKB	427037	FOXO3
Hatoum et al., 2023	36150907	Executive functions	GWAS	UKB	427037	PRKAR2A
Hatoum et al., 2023	36150907	Executive functions	GWAS	UKB	427037	RBM6
Hatoum et al., 2023	36150907	Executive functions	GWAS	UKB	427037	COL16A1
Hatoum et al., 2023	36150907	Executive functions	GWAS	UKB	427037	R3HDM1
Hatoum et al., 2023	36150907	Executive functions	GWAS	UKB	427037	GBF1
Hatoum et al., 2023	36150907	Executive functions	GWAS	UKB	427037	NPAS3
Hatoum et al., 2023	36150907	Executive functions	GWAS	UKB	427037	NFKB2
Hatoum et al., 2023	36150907	Executive functions	GWAS	UKB	427037	IP6K1
Hatoum et al., 2023	36150907	Executive functions	GWAS	UKB	427037	KLHDC8B
Hatoum et al., 2023	36150907	Executive functions	GWAS	UKB	427037	TRAM2
Hatoum et al., 2023	36150907	Executive functions	GWAS	UKB	427037	NSRP1
Hatoum et al., 2023	36150907	Executive functions	GWAS	UKB	427037	HCRTR1
Hatoum et al., 2023	36150907	Executive functions	GWAS	UKB	427037	EFCAB5
Hatoum et al., 2023	36150907	Executive functions	GWAS	UKB	427037	SH2D4B
Hatoum et al., 2023	36150907	Executive functions	GWAS	UKB	427037	TET2
Hatoum et al., 2023	36150907	Executive functions	GWAS	UKB	427037	MST1R
Hatoum et al., 2023	36150907	Executive functions	GWAS	UKB	427037	TPRKB
Hatoum et al., 2023	36150907	Executive functions	GWAS	UKB	427037	LARP7
Hatoum et al., 2023	36150907	Executive functions	GWAS	UKB	427037	PRSS8
Hatoum et al., 2023	36150907	Executive functions	GWAS	UKB	427037	CDHR4
Hatoum et al., 2023	36150907	Executive functions	GWAS	UKB	427037	BTRC
Hatoum et al., 2023	36150907	Executive functions	GWAS	UKB	427037	P4HTM
Hatoum et al., 2023	36150907	Executive functions	GWAS	UKB	427037	FAM160A1
Hatoum et al., 2023	36150907	Executive functions	GWAS	UKB	427037	VAC14
Hatoum et al., 2023	36150907	Executive functions	GWAS	UKB	427037	FURIN
Hatoum et al., 2023	36150907	Executive functions	GWAS	UKB	427037	FMNL2
Hatoum et al., 2023	36150907	Executive functions	GWAS	UKB	427037	CADM2
Hatoum et al., 2023	36150907	Executive functions	GWAS	UKB	427037	CREB3L4
Hatoum et al., 2023	36150907	Executive functions	GWAS	UKB	427037	PPP4C
Hatoum et al., 2023	36150907	Executive functions	GWAS	UKB	427037	GPR19
Hatoum et al., 2023	36150907	Executive functions	GWAS	UKB	427037	ZNF502
Hatoum et al., 2023	36150907	Executive functions	GWAS	UKB	427037	CACNA1I
Hatoum et al., 2023	36150907	Executive functions	GWAS	UKB	427037	ARIH2
Hatoum et al., 2023	36150907	Executive functions	GWAS	UKB	427037	NMNAT2
Hatoum et al., 2023	36150907	Executive functions	GWAS	UKB	427037	ASB3
Hatoum et al., 2023	36150907	Executive functions	GWAS	UKB	427037	CDH7
Hatoum et al., 2023	36150907	Executive functions	GWAS	UKB	427037	NUP210L
Hatoum et al., 2023	36150907	Executive functions	GWAS	UKB	427037	FAM213A
Hatoum et al., 2023	36150907	Executive functions	GWAS	UKB	427037	MSANTD4
Hatoum et al., 2023	36150907	Executive functions	GWAS	UKB	427037	PALM
Hatoum et al., 2023	36150907	Executive functions	GWAS	UKB	427037	ZC3H7B
Hatoum et al., 2023	36150907	Executive functions	GWAS	UKB	427037	CTD-2330K9.3
Hatoum et al., 2023	36150907	Executive functions	GWAS	UKB	427037	UBE2E1
Hatoum et al., 2023	36150907	Executive functions	GWAS	UKB	427037	SMYD5
Hatoum et al., 2023	36150907	Executive functions	GWAS	UKB	427037	DOT1L
Hatoum et al., 2023	36150907	Executive functions	GWAS	UKB	427037	TAOK1
Hatoum et al., 2023	36150907	Executive functions	GWAS	UKB	427037	TRAIP
Hatoum et al., 2023	36150907	Executive functions	GWAS	UKB	427037	SCG3
Hatoum et al., 2023	36150907	Executive functions	GWAS	UKB	427037	FES
Hatoum et al., 2023	36150907	Executive functions	GWAS	UKB	427037	KIF3B
Hatoum et al., 2023	36150907	Executive functions	GWAS	UKB	427037	EIF4G3
Hatoum et al., 2023	36150907	Executive functions	GWAS	UKB	427037	RC3H1
Hatoum et al., 2023	36150907	Executive functions	GWAS	UKB	427037	NTM
Hatoum et al., 2023	36150907	Executive functions	GWAS	UKB	427037	SLC6A4
Hatoum et al., 2023	36150907	Executive functions	GWAS	UKB	427037	ZNF638
Hatoum et al., 2023	36150907	Executive functions	GWAS	UKB	427037	NUCKS1
Hatoum et al., 2023	36150907	Executive functions	GWAS	UKB	427037	RPL15
Hatoum et al., 2023	36150907	Executive functions	GWAS	UKB	427037	ANKK1
Hatoum et al., 2023	36150907	Executive functions	GWAS	UKB	427037	CCT7
Hatoum et al., 2023	36150907	Executive functions	GWAS	UKB	427037	MGAT3
Hatoum et al., 2023	36150907	Executive functions	GWAS	UKB	427037	LPHN2
Hatoum et al., 2023	36150907	Executive functions	GWAS	UKB	427037	SLC38A2
Hatoum et al., 2023	36150907	Executive functions	GWAS	UKB	427037	CNOT4
Hatoum et al., 2023	36150907	Executive functions	GWAS	UKB	427037	SSH2
Hatoum et al., 2023	36150907	Executive functions	GWAS	UKB	427037	BRD3
Hatoum et al., 2023	36150907	Executive functions	GWAS	UKB	427037	AMIGO2
Hatoum et al., 2023	36150907	Executive functions	GWAS	UKB	427037	PFDN1
Hatoum et al., 2023	36150907	Executive functions	GWAS	UKB	427037	ASXL1
Hatoum et al., 2023	36150907	Executive functions	GWAS	UKB	427037	TM9SF4
Hatoum et al., 2023	36150907	Executive functions	GWAS	UKB	427037	ZNF668
Hatoum et al., 2023	36150907	Executive functions	GWAS	UKB	427037	CNBD1
Hatoum et al., 2023	36150907	Executive functions	GWAS	UKB	427037	AC106876.2
Hatoum et al., 2023	36150907	Executive functions	GWAS	UKB	427037	ARL4C
Hatoum et al., 2023	36150907	Executive functions	GWAS	UKB	427037	UGP2
Hatoum et al., 2023	36150907	Executive functions	GWAS	UKB	427037	RPTOR
Hatoum et al., 2023	36150907	Executive functions	GWAS	UKB	427037	EPHA5
Hatoum et al., 2023	36150907	Executive functions	GWAS	UKB	427037	ALAS1
Hatoum et al., 2023	36150907	Executive functions	GWAS	UKB	427037	STX4
Hatoum et al., 2023	36150907	Executive functions	GWAS	UKB	427037	CORO1A
Hatoum et al., 2023	36150907	Executive functions	GWAS	UKB	427037	GRM3
Hatoum et al., 2023	36150907	Executive functions	GWAS	UKB	427037	PSMG1
Hatoum et al., 2023	36150907	Executive functions	GWAS	UKB	427037	KIFC1
Hatoum et al., 2023	36150907	Executive functions	GWAS	UKB	427037	DCAF4
Hatoum et al., 2023	36150907	Executive functions	GWAS	UKB	427037	POU3F2
Hatoum et al., 2023	36150907	Executive functions	GWAS	UKB	427037	BRWD1
Hatoum et al., 2023	36150907	Executive functions	GWAS	UKB	427037	TTC12
Hatoum et al., 2023	36150907	Executive functions	GWAS	UKB	427037	CPD
Hatoum et al., 2023	36150907	Executive functions	GWAS	UKB	427037	DMXL2
Hatoum et al., 2023	36150907	Executive functions	GWAS	UKB	427037	BCKDK
Hatoum et al., 2023	36150907	Executive functions	GWAS	UKB	427037	CAB39L
Hatoum et al., 2023	36150907	Executive functions	GWAS	UKB	427037	RBM5
Hatoum et al., 2023	36150907	Executive functions	GWAS	UKB	427037	PDS5A
Hatoum et al., 2023	36150907	Executive functions	GWAS	UKB	427037	ZNF689
Hatoum et al., 2023	36150907	Executive functions	GWAS	UKB	427037	WDR6
Hatoum et al., 2023	36150907	Executive functions	GWAS	UKB	427037	FAM154B
Hatoum et al., 2023	36150907	Executive functions	GWAS	UKB	427037	PET112
Hatoum et al., 2023	36150907	Executive functions	GWAS	UKB	427037	FIGN
Hatoum et al., 2023	36150907	Executive functions	GWAS	UKB	427037	SUFU
Hatoum et al., 2023	36150907	Executive functions	GWAS	UKB	427037	TYW5
Hatoum et al., 2023	36150907	Executive functions	GWAS	UKB	427037	NPRL2
Hatoum et al., 2023	36150907	Executive functions	GWAS	UKB	427037	HIST1H2BE
Hatoum et al., 2023	36150907	Executive functions	GWAS	UKB	427037	ZBTB37
Hatoum et al., 2023	36150907	Executive functions	GWAS	UKB	427037	NCF2
Hatoum et al., 2023	36150907	Executive functions	GWAS	UKB	427037	RNF182
Hatoum et al., 2023	36150907	Executive functions	GWAS	UKB	427037	HMGN1
Hatoum et al., 2023	36150907	Executive functions	GWAS	UKB	427037	RAB7L1
Hatoum et al., 2023	36150907	Executive functions	GWAS	UKB	427037	C2orf69
Hatoum et al., 2023	36150907	Executive functions	GWAS	UKB	427037	CHAC2
Hatoum et al., 2023	36150907	Executive functions	GWAS	UKB	427037	GRIK2
Hatoum et al., 2023	36150907	Executive functions	GWAS	UKB	427037	PSD
Hatoum et al., 2023	36150907	Executive functions	GWAS	UKB	427037	ANKRD45
Hatoum et al., 2023	36150907	Executive functions	GWAS	UKB	427037	BCL11B
Hatoum et al., 2023	36150907	Executive functions	GWAS	UKB	427037	EFTUD1
Hatoum et al., 2023	36150907	Executive functions	GWAS	UKB	427037	SLC25A28
Hatoum et al., 2023	36150907	Executive functions	GWAS	UKB	427037	NOTO
Hatoum et al., 2023	36150907	Executive functions	GWAS	UKB	427037	ACTR1A
Hatoum et al., 2023	36150907	Executive functions	GWAS	UKB	427037	ENTPD7
Hatoum et al., 2023	36150907	Executive functions	GWAS	UKB	427037	GPC5
Hatoum et al., 2023	36150907	Executive functions	GWAS	UKB	427037	CALU
Hatoum et al., 2023	36150907	Executive functions	GWAS	UKB	427037	DNMBP
Hatoum et al., 2023	36150907	Executive functions	GWAS	UKB	427037	HIST1H4H
Hatoum et al., 2023	36150907	Executive functions	GWAS	UKB	427037	WBP1L
Hatoum et al., 2023	36150907	Executive functions	GWAS	UKB	427037	ADAMTSL3
Hatoum et al., 2023	36150907	Executive functions	GWAS	UKB	427037	KCNC3
Hatoum et al., 2023	36150907	Executive functions	GWAS	UKB	427037	TAB1
Hatoum et al., 2023	36150907	Executive functions	GWAS	UKB	427037	YPEL3
Hatoum et al., 2023	36150907	Executive functions	GWAS	UKB	427037	MED4
Hatoum et al., 2023	36150907	Executive functions	GWAS	UKB	427037	NOSIP
Hatoum et al., 2023	36150907	Executive functions	GWAS	UKB	427037	LPXN
Hatoum et al., 2023	36150907	Executive functions	GWAS	UKB	427037	PCDHA1
Hatoum et al., 2023	36150907	Executive functions	GWAS	UKB	427037	H2AFV
Hatoum et al., 2023	36150907	Executive functions	GWAS	UKB	427037	ZFP91
Hatoum et al., 2023	36150907	Executive functions	GWAS	UKB	427037	ARL3
Hatoum et al., 2023	36150907	Executive functions	GWAS	UKB	427037	ERLEC1
Hatoum et al., 2023	36150907	Executive functions	GWAS	UKB	427037	BCL11A
Hatoum et al., 2023	36150907	Executive functions	GWAS	UKB	427037	AATK
Hatoum et al., 2023	36150907	Executive functions	GWAS	UKB	427037	HP1BP3
Hatoum et al., 2023	36150907	Executive functions	GWAS	UKB	427037	M6PR
Hatoum et al., 2023	36150907	Executive functions	GWAS	UKB	427037	SYNGR1
Hatoum et al., 2023	36150907	Executive functions	GWAS	UKB	427037	KIAA1143
Hatoum et al., 2023	36150907	Executive functions	GWAS	UKB	427037	RP11-3B7.1
Hatoum et al., 2023	36150907	Executive functions	GWAS	UKB	427037	SERPINC1
Hatoum et al., 2023	36150907	Executive functions	GWAS	UKB	427037	MAP3K19
Hatoum et al., 2023	36150907	Executive functions	GWAS	UKB	427037	PLCB1
Hatoum et al., 2023	36150907	Executive functions	GWAS	UKB	427037	TLR9
Hatoum et al., 2023	36150907	Executive functions	GWAS	UKB	427037	QARS
Hatoum et al., 2023	36150907	Executive functions	GWAS	UKB	427037	WDR82
Hatoum et al., 2023	36150907	Executive functions	GWAS	UKB	427037	HARS
Hatoum et al., 2023	36150907	Executive functions	GWAS	UKB	427037	GABRA1
Hatoum et al., 2023	36150907	Executive functions	GWAS	UKB	427037	MSRA
Hatoum et al., 2023	36150907	Executive functions	GWAS	UKB	427037	SOCS5
Hatoum et al., 2023	36150907	Executive functions	GWAS	UKB	427037	CYSTM1
Hatoum et al., 2023	36150907	Executive functions	GWAS	UKB	427037	TMEM8A
Hatoum et al., 2023	36150907	Executive functions	GWAS	UKB	427037	EFHC1
Hatoum et al., 2023	36150907	Executive functions	GWAS	UKB	427037	SLC4A8
Hatoum et al., 2023	36150907	Executive functions	GWAS	UKB	427037	PCDHA2
Hatoum et al., 2023	36150907	Executive functions	GWAS	UKB	427037	SPAST
Hatoum et al., 2023	36150907	Executive functions	GWAS	UKB	427037	HARS2
Hatoum et al., 2023	36150907	Executive functions	GWAS	UKB	427037	SLC24A2
Hatoum et al., 2023	36150907	Executive functions	GWAS	UKB	427037	PSMA5
Hatoum et al., 2023	36150907	Executive functions	GWAS	UKB	427037	SNX1
Hatoum et al., 2023	36150907	Executive functions	GWAS	UKB	427037	GADD45G
Hatoum et al., 2023	36150907	Executive functions	GWAS	UKB	427037	MON1A
Hatoum et al., 2023	36150907	Executive functions	GWAS	UKB	427037	ZFP91-CNTF
Hatoum et al., 2023	36150907	Executive functions	GWAS	UKB	427037	GABRA6
Hatoum et al., 2023	36150907	Executive functions	GWAS	UKB	427037	ZNF35
Hatoum et al., 2023	36150907	Executive functions	GWAS	UKB	427037	EIF4E3
Hatoum et al., 2023	36150907	Executive functions	GWAS	UKB	427037	MAPK3
Hatoum et al., 2023	36150907	Executive functions	GWAS	UKB	427037	FAM96A
Hatoum et al., 2023	36150907	Executive functions	GWAS	UKB	427037	PPIA
Hatoum et al., 2023	36150907	Executive functions	GWAS	UKB	427037	NAT8
Hatoum et al., 2023	36150907	Executive functions	GWAS	UKB	427037	SYT3
Hatoum et al., 2023	36150907	Executive functions	GWAS	UKB	427037	WDR55
Hatoum et al., 2023	36150907	Executive functions	GWAS	UKB	427037	TAL1
Hatoum et al., 2023	36150907	Executive functions	GWAS	UKB	427037	MAT1A
Hatoum et al., 2023	36150907	Executive functions	GWAS	UKB	427037	PCDHB13
Hatoum et al., 2023	36150907	Executive functions	GWAS	UKB	427037	FAM196B
Hatoum et al., 2023	36150907	Executive functions	GWAS	UKB	427037	FOXP1
Hatoum et al., 2023	36150907	Executive functions	GWAS	UKB	427037	TBC1D31
Hatoum et al., 2023	36150907	Executive functions	GWAS	UKB	427037	STX1B
Hatoum et al., 2023	36150907	Executive functions	GWAS	UKB	427037	CEP63
Bralten et al., 2021	34054130	Sociability	GWAS	UKB	342461	TMX2
Bralten et al., 2021	34054130	Sociability	GWAS	UKB	342461	MBD5
Bralten et al., 2021	34054130	Sociability	GWAS	UKB	342461	GRM8
Bralten et al., 2021	34054130	Sociability	GWAS	UKB	342461	C11orf31
Bralten et al., 2021	34054130	Sociability	GWAS	UKB	342461	TTC12
Bralten et al., 2021	34054130	Sociability	GWAS	UKB	342461	SERPING1
Bralten et al., 2021	34054130	Sociability	GWAS	UKB	342461	BAIAP2
Bralten et al., 2021	34054130	Sociability	GWAS	UKB	342461	ASCC3
Bralten et al., 2021	34054130	Sociability	GWAS	UKB	342461	STAU1
Bralten et al., 2021	34054130	Sociability	GWAS	UKB	342461	CDH7
Bralten et al., 2021	34054130	Sociability	GWAS	UKB	342461	MYO1H
Bralten et al., 2021	34054130	Sociability	GWAS	UKB	342461	SOX5
Bralten et al., 2021	34054130	Sociability	GWAS	UKB	342461	SIM1
Bralten et al., 2021	34054130	Sociability	GWAS	UKB	342461	PPP6C
Bralten et al., 2021	34054130	Sociability	GWAS	UKB	342461	CTNND1
Bralten et al., 2021	34054130	Sociability	GWAS	UKB	342461	STK4
Bralten et al., 2021	34054130	Sociability	GWAS	UKB	342461	DDX39B
Bralten et al., 2021	34054130	Sociability	GWAS	UKB	342461	FNBP4
Bralten et al., 2021	34054130	Sociability	GWAS	UKB	342461	CSE1L
Bralten et al., 2021	34054130	Sociability	GWAS	UKB	342461	OR9Q1
Bralten et al., 2021	34054130	Sociability	GWAS	UKB	342461	TLK2
Bralten et al., 2021	34054130	Sociability	GWAS	UKB	342461	TAOK3
Bralten et al., 2021	34054130	Sociability	GWAS	UKB	342461	MED19
Bralten et al., 2021	34054130	Sociability	GWAS	UKB	342461	MCCD1
Bralten et al., 2021	34054130	Sociability	GWAS	UKB	342461	GLIS3
Bralten et al., 2021	34054130	Sociability	GWAS	UKB	342461	MRC2
Bralten et al., 2021	34054130	Sociability	GWAS	UKB	342461	ELAVL2
Bralten et al., 2021	34054130	Sociability	GWAS	UKB	342461	PRICKLE1
Bralten et al., 2021	34054130	Sociability	GWAS	UKB	342461	SYBU
Bralten et al., 2021	34054130	Sociability	GWAS	UKB	342461	ASXL3
Bralten et al., 2021	34054130	Sociability	GWAS	UKB	342461	CELF4
Bralten et al., 2021	34054130	Sociability	GWAS	UKB	342461	NECAB1
Bralten et al., 2021	34054130	Sociability	GWAS	UKB	342461	FBXL17
Bralten et al., 2021	34054130	Sociability	GWAS	UKB	342461	ANKRD10
Bralten et al., 2021	34054130	Sociability	GWAS	UKB	342461	KCNJ3
Bralten et al., 2021	34054130	Sociability	GWAS	UKB	342461	GBE1
Bralten et al., 2021	34054130	Sociability	GWAS	UKB	342461	RABEPK
Bralten et al., 2021	34054130	Sociability	GWAS	UKB	342461	CCDC71
Bralten et al., 2021	34054130	Sociability	GWAS	UKB	342461	PCDH9
Bralten et al., 2021	34054130	Sociability	GWAS	UKB	342461	CCDC36
Bralten et al., 2021	34054130	Sociability	GWAS	UKB	342461	HLA-B
Bralten et al., 2021	34054130	Sociability	GWAS	UKB	342461	URI1
Bralten et al., 2021	34054130	Sociability	GWAS	UKB	342461	ISL1
Bralten et al., 2021	34054130	Sociability	GWAS	UKB	342461	ZDHHC5
Bralten et al., 2021	34054130	Sociability	GWAS	UKB	342461	SUDS3
Bralten et al., 2021	34054130	Sociability	GWAS	UKB	342461	PHF2
Bralten et al., 2021	34054130	Sociability	GWAS	UKB	342461	ARPP21
Bralten et al., 2021	34054130	Sociability	GWAS	UKB	342461	C8orf88
Bralten et al., 2021	34054130	Sociability	GWAS	UKB	342461	DRD2
Bralten et al., 2021	34054130	Sociability	GWAS	UKB	342461	TMEM55A
Bralten et al., 2021	34054130	Sociability	GWAS	UKB	342461	SGCZ
Bralten et al., 2021	34054130	Sociability	GWAS	UKB	342461	HIST1H2BD
Bralten et al., 2021	34054130	Sociability	GWAS	UKB	342461	ANKK1
Bralten et al., 2021	34054130	Sociability	GWAS	UKB	342461	ARNTL
Bralten et al., 2021	34054130	Sociability	GWAS	UKB	342461	GATAD2A
Bralten et al., 2021	34054130	Sociability	GWAS	UKB	342461	PFDN1
Nagel et al., 2018	29942085	Neuroticism	Meta-analysis of GWAS	UKB, 23andMe, GPC1	449484	STH
Nagel et al., 2018	29942085	Neuroticism	Meta-analysis of GWAS	UKB, 23andMe, GPC1	449484	WNT3
Nagel et al., 2018	29942085	Neuroticism	Meta-analysis of GWAS	UKB, 23andMe, GPC1	449484	SPPL2C
Nagel et al., 2018	29942085	Neuroticism	Meta-analysis of GWAS	UKB, 23andMe, GPC1	449484	DRD2
Nagel et al., 2018	29942085	Neuroticism	Meta-analysis of GWAS	UKB, 23andMe, GPC1	449484	CRHR1
Nagel et al., 2018	29942085	Neuroticism	Meta-analysis of GWAS	UKB, 23andMe, GPC1	449484	NSF
Nagel et al., 2018	29942085	Neuroticism	Meta-analysis of GWAS	UKB, 23andMe, GPC1	449484	KANSL1
Nagel et al., 2018	29942085	Neuroticism	Meta-analysis of GWAS	UKB, 23andMe, GPC1	449484	ARHGAP27
Nagel et al., 2018	29942085	Neuroticism	Meta-analysis of GWAS	UKB, 23andMe, GPC1	449484	GRM8
Nagel et al., 2018	29942085	Neuroticism	Meta-analysis of GWAS	UKB, 23andMe, GPC1	449484	MAPT
Nagel et al., 2018	29942085	Neuroticism	Meta-analysis of GWAS	UKB, 23andMe, GPC1	449484	LRRC37A
Nagel et al., 2018	29942085	Neuroticism	Meta-analysis of GWAS	UKB, 23andMe, GPC1	449484	RBFOX1
Nagel et al., 2018	29942085	Neuroticism	Meta-analysis of GWAS	UKB, 23andMe, GPC1	449484	PLEKHM1
Nagel et al., 2018	29942085	Neuroticism	Meta-analysis of GWAS	UKB, 23andMe, GPC1	449484	SOX5
Nagel et al., 2018	29942085	Neuroticism	Meta-analysis of GWAS	UKB, 23andMe, GPC1	449484	CELF4
Nagel et al., 2018	29942085	Neuroticism	Meta-analysis of GWAS	UKB, 23andMe, GPC1	449484	ARL17B
Nagel et al., 2018	29942085	Neuroticism	Meta-analysis of GWAS	UKB, 23andMe, GPC1	449484	DCC
Nagel et al., 2018	29942085	Neuroticism	Meta-analysis of GWAS	UKB, 23andMe, GPC1	449484	PTCH1
Nagel et al., 2018	29942085	Neuroticism	Meta-analysis of GWAS	UKB, 23andMe, GPC1	449484	TCF4
Nagel et al., 2018	29942085	Neuroticism	Meta-analysis of GWAS	UKB, 23andMe, GPC1	449484	ZC3H7B
Nagel et al., 2018	29942085	Neuroticism	Meta-analysis of GWAS	UKB, 23andMe, GPC1	449484	RANGAP1
Nagel et al., 2018	29942085	Neuroticism	Meta-analysis of GWAS	UKB, 23andMe, GPC1	449484	CADM2
Nagel et al., 2018	29942085	Neuroticism	Meta-analysis of GWAS	UKB, 23andMe, GPC1	449484	ANKK1
Nagel et al., 2018	29942085	Neuroticism	Meta-analysis of GWAS	UKB, 23andMe, GPC1	449484	MSRA
Nagel et al., 2018	29942085	Neuroticism	Meta-analysis of GWAS	UKB, 23andMe, GPC1	449484	CNTN5
Nagel et al., 2018	29942085	Neuroticism	Meta-analysis of GWAS	UKB, 23andMe, GPC1	449484	TTC12
Nagel et al., 2018	29942085	Neuroticism	Meta-analysis of GWAS	UKB, 23andMe, GPC1	449484	YLPM1
Nagel et al., 2018	29942085	Neuroticism	Meta-analysis of GWAS	UKB, 23andMe, GPC1	449484	MYO1H
Nagel et al., 2018	29942085	Neuroticism	Meta-analysis of GWAS	UKB, 23andMe, GPC1	449484	POU6F2
Nagel et al., 2018	29942085	Neuroticism	Meta-analysis of GWAS	UKB, 23andMe, GPC1	449484	BAIAP2
Nagel et al., 2018	29942085	Neuroticism	Meta-analysis of GWAS	UKB, 23andMe, GPC1	449484	TNXB
Nagel et al., 2018	29942085	Neuroticism	Meta-analysis of GWAS	UKB, 23andMe, GPC1	449484	TMEM161B
Nagel et al., 2018	29942085	Neuroticism	Meta-analysis of GWAS	UKB, 23andMe, GPC1	449484	FAM120A
Nagel et al., 2018	29942085	Neuroticism	Meta-analysis of GWAS	UKB, 23andMe, GPC1	449484	EP300
Nagel et al., 2018	29942085	Neuroticism	Meta-analysis of GWAS	UKB, 23andMe, GPC1	449484	GLIS3
Nagel et al., 2018	29942085	Neuroticism	Meta-analysis of GWAS	UKB, 23andMe, GPC1	449484	NCAM1
Nagel et al., 2018	29942085	Neuroticism	Meta-analysis of GWAS	UKB, 23andMe, GPC1	449484	PAX6
Nagel et al., 2018	29942085	Neuroticism	Meta-analysis of GWAS	UKB, 23andMe, GPC1	449484	DLST
Nagel et al., 2018	29942085	Neuroticism	Meta-analysis of GWAS	UKB, 23andMe, GPC1	449484	ARNTL
Nagel et al., 2018	29942085	Neuroticism	Meta-analysis of GWAS	UKB, 23andMe, GPC1	449484	TEF
Nagel et al., 2018	29942085	Neuroticism	Meta-analysis of GWAS	UKB, 23andMe, GPC1	449484	PRRC2A
Nagel et al., 2018	29942085	Neuroticism	Meta-analysis of GWAS	UKB, 23andMe, GPC1	449484	SETD1A
Nagel et al., 2018	29942085	Neuroticism	Meta-analysis of GWAS	UKB, 23andMe, GPC1	449484	BAG6
Nagel et al., 2018	29942085	Neuroticism	Meta-analysis of GWAS	UKB, 23andMe, GPC1	449484	PROX2
Nagel et al., 2018	29942085	Neuroticism	Meta-analysis of GWAS	UKB, 23andMe, GPC1	449484	MVK
Nagel et al., 2018	29942085	Neuroticism	Meta-analysis of GWAS	UKB, 23andMe, GPC1	449484	BBX
Nagel et al., 2018	29942085	Neuroticism	Meta-analysis of GWAS	UKB, 23andMe, GPC1	449484	TMX2
Nagel et al., 2018	29942085	Neuroticism	Meta-analysis of GWAS	UKB, 23andMe, GPC1	449484	ZNF646
Nagel et al., 2018	29942085	Neuroticism	Meta-analysis of GWAS	UKB, 23andMe, GPC1	449484	SLC39A13
Nagel et al., 2018	29942085	Neuroticism	Meta-analysis of GWAS	UKB, 23andMe, GPC1	449484	UBE3B
Nagel et al., 2018	29942085	Neuroticism	Meta-analysis of GWAS	UKB, 23andMe, GPC1	449484	MMAB
Nagel et al., 2018	29942085	Neuroticism	Meta-analysis of GWAS	UKB, 23andMe, GPC1	449484	CELF2
Nagel et al., 2018	29942085	Neuroticism	Meta-analysis of GWAS	UKB, 23andMe, GPC1	449484	TOX3
Nagel et al., 2018	29942085	Neuroticism	Meta-analysis of GWAS	UKB, 23andMe, GPC1	449484	CHADL
Nagel et al., 2018	29942085	Neuroticism	Meta-analysis of GWAS	UKB, 23andMe, GPC1	449484	CTNND1
Nagel et al., 2018	29942085	Neuroticism	Meta-analysis of GWAS	UKB, 23andMe, GPC1	449484	L3MBTL2
Nagel et al., 2018	29942085	Neuroticism	Meta-analysis of GWAS	UKB, 23andMe, GPC1	449484	PHF5A
Nagel et al., 2018	29942085	Neuroticism	Meta-analysis of GWAS	UKB, 23andMe, GPC1	449484	RABGAP1L
Nagel et al., 2018	29942085	Neuroticism	Meta-analysis of GWAS	UKB, 23andMe, GPC1	449484	IGSF9B
Nagel et al., 2018	29942085	Neuroticism	Meta-analysis of GWAS	UKB, 23andMe, GPC1	449484	ZDHHC5
Nagel et al., 2018	29942085	Neuroticism	Meta-analysis of GWAS	UKB, 23andMe, GPC1	449484	SORCS3
Nagel et al., 2018	29942085	Neuroticism	Meta-analysis of GWAS	UKB, 23andMe, GPC1	449484	TOB2
Nagel et al., 2018	29942085	Neuroticism	Meta-analysis of GWAS	UKB, 23andMe, GPC1	449484	MSH5
Nagel et al., 2018	29942085	Neuroticism	Meta-analysis of GWAS	UKB, 23andMe, GPC1	449484	SPI1
Nagel et al., 2018	29942085	Neuroticism	Meta-analysis of GWAS	UKB, 23andMe, GPC1	449484	AGBL2
Nagel et al., 2018	29942085	Neuroticism	Meta-analysis of GWAS	UKB, 23andMe, GPC1	449484	STX1B
Nagel et al., 2018	29942085	Neuroticism	Meta-analysis of GWAS	UKB, 23andMe, GPC1	449484	ATF6B
Nagel et al., 2018	29942085	Neuroticism	Meta-analysis of GWAS	UKB, 23andMe, GPC1	449484	SHISA9
Nagel et al., 2018	29942085	Neuroticism	Meta-analysis of GWAS	UKB, 23andMe, GPC1	449484	NUP160
Nagel et al., 2018	29942085	Neuroticism	Meta-analysis of GWAS	UKB, 23andMe, GPC1	449484	ENAH
Nagel et al., 2018	29942085	Neuroticism	Meta-analysis of GWAS	UKB, 23andMe, GPC1	449484	PRSS53
Nagel et al., 2018	29942085	Neuroticism	Meta-analysis of GWAS	UKB, 23andMe, GPC1	449484	KCTD10
Nagel et al., 2018	29942085	Neuroticism	Meta-analysis of GWAS	UKB, 23andMe, GPC1	449484	LINGO2
Nagel et al., 2018	29942085	Neuroticism	Meta-analysis of GWAS	UKB, 23andMe, GPC1	449484	STX4
Nagel et al., 2018	29942085	Neuroticism	Meta-analysis of GWAS	UKB, 23andMe, GPC1	449484	SLC44A4
Nagel et al., 2018	29942085	Neuroticism	Meta-analysis of GWAS	UKB, 23andMe, GPC1	449484	FBXL19
Nagel et al., 2018	29942085	Neuroticism	Meta-analysis of GWAS	UKB, 23andMe, GPC1	449484	MAP1LC3B
Nagel et al., 2018	29942085	Neuroticism	Meta-analysis of GWAS	UKB, 23andMe, GPC1	449484	PSMC3
Nagel et al., 2018	29942085	Neuroticism	Meta-analysis of GWAS	UKB, 23andMe, GPC1	449484	CLUH
Nagel et al., 2018	29942085	Neuroticism	Meta-analysis of GWAS	UKB, 23andMe, GPC1	449484	TMEM106B
Nagel et al., 2018	29942085	Neuroticism	Meta-analysis of GWAS	UKB, 23andMe, GPC1	449484	POLR3H
Nagel et al., 2018	29942085	Neuroticism	Meta-analysis of GWAS	UKB, 23andMe, GPC1	449484	ZNF668
Nagel et al., 2018	29942085	Neuroticism	Meta-analysis of GWAS	UKB, 23andMe, GPC1	449484	XKR6
Nagel et al., 2018	29942085	Neuroticism	Meta-analysis of GWAS	UKB, 23andMe, GPC1	449484	SUDS3
Nagel et al., 2018	29942085	Neuroticism	Meta-analysis of GWAS	UKB, 23andMe, GPC1	449484	MAGI1
Nagel et al., 2018	29942085	Neuroticism	Meta-analysis of GWAS	UKB, 23andMe, GPC1	449484	EHMT2
Nagel et al., 2018	29942085	Neuroticism	Meta-analysis of GWAS	UKB, 23andMe, GPC1	449484	KDM3A
Nagel et al., 2018	29942085	Neuroticism	Meta-analysis of GWAS	UKB, 23andMe, GPC1	449484	HSD3B7
Nagel et al., 2018	29942085	Neuroticism	Meta-analysis of GWAS	UKB, 23andMe, GPC1	449484	MYBPC3
Nagel et al., 2018	29942085	Neuroticism	Meta-analysis of GWAS	UKB, 23andMe, GPC1	449484	AS3MT
Nagel et al., 2018	29942085	Neuroticism	Meta-analysis of GWAS	UKB, 23andMe, GPC1	449484	MED19
Nagel et al., 2018	29942085	Neuroticism	Meta-analysis of GWAS	UKB, 23andMe, GPC1	449484	HIST1H2AC
Nagel et al., 2018	29942085	Neuroticism	Meta-analysis of GWAS	UKB, 23andMe, GPC1	449484	STK19
Nagel et al., 2018	29942085	Neuroticism	Meta-analysis of GWAS	UKB, 23andMe, GPC1	449484	ANKRD10
Nagel et al., 2018	29942085	Neuroticism	Meta-analysis of GWAS	UKB, 23andMe, GPC1	449484	HIST1H2BC
Nagel et al., 2018	29942085	Neuroticism	Meta-analysis of GWAS	UKB, 23andMe, GPC1	449484	FNBP4
Nagel et al., 2018	29942085	Neuroticism	Meta-analysis of GWAS	UKB, 23andMe, GPC1	449484	ERICH1-AS1
Nagel et al., 2018	29942085	Neuroticism	Meta-analysis of GWAS	UKB, 23andMe, GPC1	449484	HIST1H2BN
Nagel et al., 2018	29942085	Neuroticism	Meta-analysis of GWAS	UKB, 23andMe, GPC1	449484	MBD5
Nagel et al., 2018	29942085	Neuroticism	Meta-analysis of GWAS	UKB, 23andMe, GPC1	449484	TAOK3
Nagel et al., 2018	29942085	Neuroticism	Meta-analysis of GWAS	UKB, 23andMe, GPC1	449484	SEMA6D
Nagel et al., 2018	29942085	Neuroticism	Meta-analysis of GWAS	UKB, 23andMe, GPC1	449484	KIRREL3
Nagel et al., 2018	29942085	Neuroticism	Meta-analysis of GWAS	UKB, 23andMe, GPC1	449484	FBXL17
Nagel et al., 2018	29942085	Neuroticism	Meta-analysis of GWAS	UKB, 23andMe, GPC1	449484	ASXL3
Nagel et al., 2018	29942085	Neuroticism	Meta-analysis of GWAS	UKB, 23andMe, GPC1	449484	EXD2
Nagel et al., 2018	29942085	Neuroticism	Meta-analysis of GWAS	UKB, 23andMe, GPC1	449484	ARPP21
Nagel et al., 2018	29942085	Neuroticism	Meta-analysis of GWAS	UKB, 23andMe, GPC1	449484	ELAVL2
Nagel et al., 2018	29942085	Neuroticism	Meta-analysis of GWAS	UKB, 23andMe, GPC1	449484	RPS6KL1
Nagel et al., 2018	29942085	Neuroticism	Meta-analysis of GWAS	UKB, 23andMe, GPC1	449484	AREL1
Nagel et al., 2018	29942085	Neuroticism	Meta-analysis of GWAS	UKB, 23andMe, GPC1	449484	CACNA1E
Nagel et al., 2018	29942085	Neuroticism	Meta-analysis of GWAS	UKB, 23andMe, GPC1	449484	FHIT
Nagel et al., 2018	29942085	Neuroticism	Meta-analysis of GWAS	UKB, 23andMe, GPC1	449484	FAM120AOS
Nagel et al., 2018	29942085	Neuroticism	Meta-analysis of GWAS	UKB, 23andMe, GPC1	449484	PHF2
Nagel et al., 2018	29942085	Neuroticism	Meta-analysis of GWAS	UKB, 23andMe, GPC1	449484	NOTCH4
Nagel et al., 2018	29942085	Neuroticism	Meta-analysis of GWAS	UKB, 23andMe, GPC1	449484	C11orf31
Nagel et al., 2018	29942085	Neuroticism	Meta-analysis of GWAS	UKB, 23andMe, GPC1	449484	C11orf49
Nagel et al., 2018	29942085	Neuroticism	Meta-analysis of GWAS	UKB, 23andMe, GPC1	449484	ROBO2
Nagel et al., 2018	29942085	Neuroticism	Meta-analysis of GWAS	UKB, 23andMe, GPC1	449484	CAMTA1
Nagel et al., 2018	29942085	Neuroticism	Meta-analysis of GWAS	UKB, 23andMe, GPC1	449484	SGCZ
Nagel et al., 2018	29942085	Neuroticism	Meta-analysis of GWAS	UKB, 23andMe, GPC1	449484	MEI1
Nagel et al., 2018	29942085	Neuroticism	Meta-analysis of GWAS	UKB, 23andMe, GPC1	449484	NEGR1
Nagel et al., 2018	29942085	Neuroticism	Meta-analysis of GWAS	UKB, 23andMe, GPC1	449484	CD40
Nagel et al., 2018	29942085	Neuroticism	Meta-analysis of GWAS	UKB, 23andMe, GPC1	449484	VPS41
Nagel et al., 2018	29942085	Neuroticism	Meta-analysis of GWAS	UKB, 23andMe, GPC1	449484	MFSD2B
Nagel et al., 2018	29942085	Neuroticism	Meta-analysis of GWAS	UKB, 23andMe, GPC1	449484	HLA-DRA
Nagel et al., 2018	29942085	Neuroticism	Meta-analysis of GWAS	UKB, 23andMe, GPC1	449484	SKIV2L
Nagel et al., 2018	29942085	Neuroticism	Meta-analysis of GWAS	UKB, 23andMe, GPC1	449484	PRKCA
Nagel et al., 2018	29942085	Neuroticism	Meta-analysis of GWAS	UKB, 23andMe, GPC1	449484	NRP2
Nagel et al., 2018	29942085	Neuroticism	Meta-analysis of GWAS	UKB, 23andMe, GPC1	449484	CSDC2
Nagel et al., 2018	29942085	Neuroticism	Meta-analysis of GWAS	UKB, 23andMe, GPC1	449484	TRPS1
Nagel et al., 2018	29942085	Neuroticism	Meta-analysis of GWAS	UKB, 23andMe, GPC1	449484	ACVR2A
Nagel et al., 2018	29942085	Neuroticism	Meta-analysis of GWAS	UKB, 23andMe, GPC1	449484	KLF11
Nagel et al., 2018	29942085	Neuroticism	Meta-analysis of GWAS	UKB, 23andMe, GPC1	449484	CSNK2B
Nagel et al., 2018	29942085	Neuroticism	Meta-analysis of GWAS	UKB, 23andMe, GPC1	449484	NOS1
Nagel et al., 2018	29942085	Neuroticism	Meta-analysis of GWAS	UKB, 23andMe, GPC1	449484	GPC6
Nagel et al., 2018	29942085	Neuroticism	Meta-analysis of GWAS	UKB, 23andMe, GPC1	449484	FBXO31
Nagel et al., 2018	29942085	Neuroticism	Meta-analysis of GWAS	UKB, 23andMe, GPC1	449484	MED24
Nagel et al., 2018	29942085	Neuroticism	Meta-analysis of GWAS	UKB, 23andMe, GPC1	449484	NOL4
Nagel et al., 2018	29942085	Neuroticism	Meta-analysis of GWAS	UKB, 23andMe, GPC1	449484	FAM19A1
Nagel et al., 2018	29942085	Neuroticism	Meta-analysis of GWAS	UKB, 23andMe, GPC1	449484	PACSIN3
Nagel et al., 2018	29942085	Neuroticism	Meta-analysis of GWAS	UKB, 23andMe, GPC1	449484	C1QTNF4
Nagel et al., 2018	29942085	Neuroticism	Meta-analysis of GWAS	UKB, 23andMe, GPC1	449484	SIM1
Nagel et al., 2018	29942085	Neuroticism	Meta-analysis of GWAS	UKB, 23andMe, GPC1	449484	ACO2
Nagel et al., 2018	29942085	Neuroticism	Meta-analysis of GWAS	UKB, 23andMe, GPC1	449484	PCLO
Nagel et al., 2018	29942085	Neuroticism	Meta-analysis of GWAS	UKB, 23andMe, GPC1	449484	SOX6
Nagel et al., 2018	29942085	Neuroticism	Meta-analysis of GWAS	UKB, 23andMe, GPC1	449484	CKAP5
Nagel et al., 2018	29942085	Neuroticism	Meta-analysis of GWAS	UKB, 23andMe, GPC1	449484	ZMYND10
Nagel et al., 2018	29942085	Neuroticism	Meta-analysis of GWAS	UKB, 23andMe, GPC1	449484	AIF1
Nagel et al., 2018	29942085	Neuroticism	Meta-analysis of GWAS	UKB, 23andMe, GPC1	449484	BEND4
Nagel et al., 2018	29942085	Neuroticism	Meta-analysis of GWAS	UKB, 23andMe, GPC1	449484	DTD1
Nagel et al., 2018	29942085	Neuroticism	Meta-analysis of GWAS	UKB, 23andMe, GPC1	449484	BCKDK
Nagel et al., 2018	29942085	Neuroticism	Meta-analysis of GWAS	UKB, 23andMe, GPC1	449484	GPSM3
Nagel et al., 2018	29942085	Neuroticism	Meta-analysis of GWAS	UKB, 23andMe, GPC1	449484	ERI3
Nagel et al., 2018	29942085	Neuroticism	Meta-analysis of GWAS	UKB, 23andMe, GPC1	449484	AATK
Nagel et al., 2018	29942085	Neuroticism	Meta-analysis of GWAS	UKB, 23andMe, GPC1	449484	SERPING1
Nagel et al., 2018	29942085	Neuroticism	Meta-analysis of GWAS	UKB, 23andMe, GPC1	449484	TENM2
Nagel et al., 2018	29942085	Neuroticism	Meta-analysis of GWAS	UKB, 23andMe, GPC1	449484	MMS22L
Nagel et al., 2018	29942085	Neuroticism	Meta-analysis of GWAS	UKB, 23andMe, GPC1	449484	DDR1
Nagel et al., 2018	29942085	Neuroticism	Meta-analysis of GWAS	UKB, 23andMe, GPC1	449484	SNCA
Nagel et al., 2018	29942085	Neuroticism	Meta-analysis of GWAS	UKB, 23andMe, GPC1	449484	SATB2
Nagel et al., 2018	29942085	Neuroticism	Meta-analysis of GWAS	UKB, 23andMe, GPC1	449484	GALNT2
Nagel et al., 2018	29942085	Neuroticism	Meta-analysis of GWAS	UKB, 23andMe, GPC1	449484	NT5C2
Nagel et al., 2018	29942085	Neuroticism	Meta-analysis of GWAS	UKB, 23andMe, GPC1	449484	PCCB
Nagel et al., 2018	29942085	Neuroticism	Meta-analysis of GWAS	UKB, 23andMe, GPC1	449484	LRP4
Nagel et al., 2018	29942085	Neuroticism	Meta-analysis of GWAS	UKB, 23andMe, GPC1	449484	PBRM1
Nagel et al., 2018	29942085	Neuroticism	Meta-analysis of GWAS	UKB, 23andMe, GPC1	449484	MAP1LC3A
Nagel et al., 2018	29942085	Neuroticism	Meta-analysis of GWAS	UKB, 23andMe, GPC1	449484	PER1
Nagel et al., 2018	29942085	Neuroticism	Meta-analysis of GWAS	UKB, 23andMe, GPC1	449484	UGP2
Nagel et al., 2018	29942085	Neuroticism	Meta-analysis of GWAS	UKB, 23andMe, GPC1	449484	CNNM2
Nagel et al., 2018	29942085	Neuroticism	Meta-analysis of GWAS	UKB, 23andMe, GPC1	449484	PARD3B
Nagel et al., 2018	29942085	Neuroticism	Meta-analysis of GWAS	UKB, 23andMe, GPC1	449484	CFB
Nagel et al., 2018	29942085	Neuroticism	Meta-analysis of GWAS	UKB, 23andMe, GPC1	449484	BRI3
Nagel et al., 2018	29942085	Neuroticism	Meta-analysis of GWAS	UKB, 23andMe, GPC1	449484	VARS
Nagel et al., 2018	29942085	Neuroticism	Meta-analysis of GWAS	UKB, 23andMe, GPC1	449484	CC2D2A
Nagel et al., 2018	29942085	Neuroticism	Meta-analysis of GWAS	UKB, 23andMe, GPC1	449484	BAIAP2L1
Nagel et al., 2018	29942085	Neuroticism	Meta-analysis of GWAS	UKB, 23andMe, GPC1	449484	LIN28B
Nagel et al., 2018	29942085	Neuroticism	Meta-analysis of GWAS	UKB, 23andMe, GPC1	449484	EMX2
Nagel et al., 2018	29942085	Neuroticism	Meta-analysis of GWAS	UKB, 23andMe, GPC1	449484	ARHGEF15
Nagel et al., 2018	29942085	Neuroticism	Meta-analysis of GWAS	UKB, 23andMe, GPC1	449484	CNTNAP2
Nagel et al., 2018	29942085	Neuroticism	Meta-analysis of GWAS	UKB, 23andMe, GPC1	449484	SPATS2
Nagel et al., 2018	29942085	Neuroticism	Meta-analysis of GWAS	UKB, 23andMe, GPC1	449484	NDST3
Nagel et al., 2018	29942085	Neuroticism	Meta-analysis of GWAS	UKB, 23andMe, GPC1	449484	GLT8D1
Nagel et al., 2018	29942085	Neuroticism	Meta-analysis of GWAS	UKB, 23andMe, GPC1	449484	NT5DC2
Nagel et al., 2018	29942085	Neuroticism	Meta-analysis of GWAS	UKB, 23andMe, GPC1	449484	ITIH1
Nagel et al., 2018	29942085	Neuroticism	Meta-analysis of GWAS	UKB, 23andMe, GPC1	449484	NTRK2
Nagel et al., 2018	29942085	Neuroticism	Meta-analysis of GWAS	UKB, 23andMe, GPC1	449484	CCDC134
Nagel et al., 2018	29942085	Neuroticism	Meta-analysis of GWAS	UKB, 23andMe, GPC1	449484	SLC30A9
Nagel et al., 2018	29942085	Neuroticism	Meta-analysis of GWAS	UKB, 23andMe, GPC1	449484	AQR
Nagel et al., 2018	29942085	Neuroticism	Meta-analysis of GWAS	UKB, 23andMe, GPC1	449484	SHOX2
Nagel et al., 2018	29942085	Neuroticism	Meta-analysis of GWAS	UKB, 23andMe, GPC1	449484	PRSS12
Nagel et al., 2018	29942085	Neuroticism	Meta-analysis of GWAS	UKB, 23andMe, GPC1	449484	STAG1
Nagel et al., 2018	29942085	Neuroticism	Meta-analysis of GWAS	UKB, 23andMe, GPC1	449484	ASCC3
Nagel et al., 2018	29942085	Neuroticism	Meta-analysis of GWAS	UKB, 23andMe, GPC1	449484	LMOD1
Nagel et al., 2018	29942085	Neuroticism	Meta-analysis of GWAS	UKB, 23andMe, GPC1	449484	HIST1H3J
Nagel et al., 2018	29942085	Neuroticism	Meta-analysis of GWAS	UKB, 23andMe, GPC1	449484	KAT8
Nagel et al., 2018	29942085	Neuroticism	Meta-analysis of GWAS	UKB, 23andMe, GPC1	449484	LSM2
Nagel et al., 2018	29942085	Neuroticism	Meta-analysis of GWAS	UKB, 23andMe, GPC1	449484	GNL3
Nagel et al., 2018	29942085	Neuroticism	Meta-analysis of GWAS	UKB, 23andMe, GPC1	449484	MFHAS1
Nagel et al., 2018	29942085	Neuroticism	Meta-analysis of GWAS	UKB, 23andMe, GPC1	449484	NCOA5
Nagel et al., 2018	29942085	Neuroticism	Meta-analysis of GWAS	UKB, 23andMe, GPC1	449484	HDAC9
Nagel et al., 2018	29942085	Neuroticism	Meta-analysis of GWAS	UKB, 23andMe, GPC1	449484	ITGA2B
Nagel et al., 2018	29942085	Neuroticism	Meta-analysis of GWAS	UKB, 23andMe, GPC1	449484	STK24
Nagel et al., 2018	29942085	Neuroticism	Meta-analysis of GWAS	UKB, 23andMe, GPC1	449484	NYAP2
Nagel et al., 2018	29942085	Neuroticism	Meta-analysis of GWAS	UKB, 23andMe, GPC1	449484	GALNT10
Nagel et al., 2018	29942085	Neuroticism	Meta-analysis of GWAS	UKB, 23andMe, GPC1	449484	RAB27B
Nagel et al., 2018	29942085	Neuroticism	Meta-analysis of GWAS	UKB, 23andMe, GPC1	449484	ZSCAN16
Nagel et al., 2018	29942085	Neuroticism	Meta-analysis of GWAS	UKB, 23andMe, GPC1	449484	MBNL2
Nagel et al., 2018	29942085	Neuroticism	Meta-analysis of GWAS	UKB, 23andMe, GPC1	449484	GNAI2
Nagel et al., 2018	29942085	Neuroticism	Meta-analysis of GWAS	UKB, 23andMe, GPC1	449484	ARFGAP2
Nagel et al., 2018	29942085	Neuroticism	Meta-analysis of GWAS	UKB, 23andMe, GPC1	449484	KCNJ3
Nagel et al., 2018	29942085	Neuroticism	Meta-analysis of GWAS	UKB, 23andMe, GPC1	449484	ZNF800
Nagel et al., 2018	29942085	Neuroticism	Meta-analysis of GWAS	UKB, 23andMe, GPC1	449484	PIGU
Nagel et al., 2018	29942085	Neuroticism	Meta-analysis of GWAS	UKB, 23andMe, GPC1	449484	BEND7
Nagel et al., 2018	29942085	Neuroticism	Meta-analysis of GWAS	UKB, 23andMe, GPC1	449484	SBF2
Nagel et al., 2018	29942085	Neuroticism	Meta-analysis of GWAS	UKB, 23andMe, GPC1	449484	SLC17A3
Nagel et al., 2018	29942085	Neuroticism	Meta-analysis of GWAS	UKB, 23andMe, GPC1	449484	CELF1
Nagel et al., 2018	29942085	Neuroticism	Meta-analysis of GWAS	UKB, 23andMe, GPC1	449484	SFMBT1
Nagel et al., 2018	29942085	Neuroticism	Meta-analysis of GWAS	UKB, 23andMe, GPC1	449484	BORCS7
Nagel et al., 2018	29942085	Neuroticism	Meta-analysis of GWAS	UKB, 23andMe, GPC1	449484	RERE
Nagel et al., 2018	29942085	Neuroticism	Meta-analysis of GWAS	UKB, 23andMe, GPC1	449484	CREB3L1
Nagel et al., 2018	29942085	Neuroticism	Meta-analysis of GWAS	UKB, 23andMe, GPC1	449484	USP34
Nagel et al., 2018	29942085	Neuroticism	Meta-analysis of GWAS	UKB, 23andMe, GPC1	449484	NEK4
Nagel et al., 2018	29942085	Neuroticism	Meta-analysis of GWAS	UKB, 23andMe, GPC1	449484	UBXN2A
Nagel et al., 2018	29942085	Neuroticism	Meta-analysis of GWAS	UKB, 23andMe, GPC1	449484	AGO2
Nagel et al., 2018	29942085	Neuroticism	Meta-analysis of GWAS	UKB, 23andMe, GPC1	449484	SNU13
Nagel et al., 2018	29942085	Neuroticism	Meta-analysis of GWAS	UKB, 23andMe, GPC1	449484	GALNTL6
Nagel et al., 2018	29942085	Neuroticism	Meta-analysis of GWAS	UKB, 23andMe, GPC1	449484	ME1
Nagel et al., 2018	29942085	Neuroticism	Meta-analysis of GWAS	UKB, 23andMe, GPC1	449484	RNF166
Nagel et al., 2018	29942085	Neuroticism	Meta-analysis of GWAS	UKB, 23andMe, GPC1	449484	DCAF5
Nagel et al., 2018	29942085	Neuroticism	Meta-analysis of GWAS	UKB, 23andMe, GPC1	449484	VKORC1
Nagel et al., 2018	29942085	Neuroticism	Meta-analysis of GWAS	UKB, 23andMe, GPC1	449484	ERBB4
Nagel et al., 2018	29942085	Neuroticism	Meta-analysis of GWAS	UKB, 23andMe, GPC1	449484	EPHB1
Nagel et al., 2018	29942085	Neuroticism	Meta-analysis of GWAS	UKB, 23andMe, GPC1	449484	MADD
Nagel et al., 2018	29942085	Neuroticism	Meta-analysis of GWAS	UKB, 23andMe, GPC1	449484	TECPR1
Nagel et al., 2018	29942085	Neuroticism	Meta-analysis of GWAS	UKB, 23andMe, GPC1	449484	HSPA1L
Nagel et al., 2018	29942085	Neuroticism	Meta-analysis of GWAS	UKB, 23andMe, GPC1	449484	PSORS1C1
Nagel et al., 2018	29942085	Neuroticism	Meta-analysis of GWAS	UKB, 23andMe, GPC1	449484	EMB
Nagel et al., 2018	29942085	Neuroticism	Meta-analysis of GWAS	UKB, 23andMe, GPC1	449484	CENPW
Nagel et al., 2018	29942085	Neuroticism	Meta-analysis of GWAS	UKB, 23andMe, GPC1	449484	KIFC1
Nagel et al., 2018	29942085	Neuroticism	Meta-analysis of GWAS	UKB, 23andMe, GPC1	449484	ORC4
Nagel et al., 2018	29942085	Neuroticism	Meta-analysis of GWAS	UKB, 23andMe, GPC1	449484	CDH2
Nagel et al., 2018	29942085	Neuroticism	Meta-analysis of GWAS	UKB, 23andMe, GPC1	449484	VWA7
Nagel et al., 2018	29942085	Neuroticism	Meta-analysis of GWAS	UKB, 23andMe, GPC1	449484	NOVA2
Nagel et al., 2018	29942085	Neuroticism	Meta-analysis of GWAS	UKB, 23andMe, GPC1	449484	FCF1
Nagel et al., 2018	29942085	Neuroticism	Meta-analysis of GWAS	UKB, 23andMe, GPC1	449484	PKHD1
Nagel et al., 2018	29942085	Neuroticism	Meta-analysis of GWAS	UKB, 23andMe, GPC1	449484	ZCCHC14
Nagel et al., 2018	29942085	Neuroticism	Meta-analysis of GWAS	UKB, 23andMe, GPC1	449484	SAMD3
Nagel et al., 2018	29942085	Neuroticism	Meta-analysis of GWAS	UKB, 23andMe, GPC1	449484	NR4A3
Nagel et al., 2018	29942085	Neuroticism	Meta-analysis of GWAS	UKB, 23andMe, GPC1	449484	ITPR3
Nagel et al., 2018	29942085	Neuroticism	Meta-analysis of GWAS	UKB, 23andMe, GPC1	449484	IPO11
Nagel et al., 2018	29942085	Neuroticism	Meta-analysis of GWAS	UKB, 23andMe, GPC1	449484	ZBED4
Nagel et al., 2018	29942085	Neuroticism	Meta-analysis of GWAS	UKB, 23andMe, GPC1	449484	CCDC36
Nagel et al., 2018	29942085	Neuroticism	Meta-analysis of GWAS	UKB, 23andMe, GPC1	449484	CTF1
Nagel et al., 2018	29942085	Neuroticism	Meta-analysis of GWAS	UKB, 23andMe, GPC1	449484	FAM49B
Nagel et al., 2018	29942085	Neuroticism	Meta-analysis of GWAS	UKB, 23andMe, GPC1	449484	PAX4
Nagel et al., 2018	29942085	Neuroticism	Meta-analysis of GWAS	UKB, 23andMe, GPC1	449484	NEFL
Nagel et al., 2018	29942085	Neuroticism	Meta-analysis of GWAS	UKB, 23andMe, GPC1	449484	STAB1
Nagel et al., 2018	29942085	Neuroticism	Meta-analysis of GWAS	UKB, 23andMe, GPC1	449484	C2
Nagel et al., 2018	29942085	Neuroticism	Meta-analysis of GWAS	UKB, 23andMe, GPC1	449484	TAL1
Nagel et al., 2018	29942085	Neuroticism	Meta-analysis of GWAS	UKB, 23andMe, GPC1	449484	RASSF1
Nagel et al., 2018	29942085	Neuroticism	Meta-analysis of GWAS	UKB, 23andMe, GPC1	449484	OR9Q1
Nagel et al., 2018	29942085	Neuroticism	Meta-analysis of GWAS	UKB, 23andMe, GPC1	449484	GAB2
Nagel et al., 2018	29942085	Neuroticism	Meta-analysis of GWAS	UKB, 23andMe, GPC1	449484	HFE
Nagel et al., 2018	29942085	Neuroticism	Meta-analysis of GWAS	UKB, 23andMe, GPC1	449484	CTTNBP2
Nagel et al., 2018	29942085	Neuroticism	Meta-analysis of GWAS	UKB, 23andMe, GPC1	449484	RAPSN
Nagel et al., 2018	29942085	Neuroticism	Meta-analysis of GWAS	UKB, 23andMe, GPC1	449484	RABEPK
Nagel et al., 2018	29942085	Neuroticism	Meta-analysis of GWAS	UKB, 23andMe, GPC1	449484	EYS
Nagel et al., 2018	29942085	Neuroticism	Meta-analysis of GWAS	UKB, 23andMe, GPC1	449484	PIEZO1
Nagel et al., 2018	29942085	Neuroticism	Meta-analysis of GWAS	UKB, 23andMe, GPC1	449484	BRINP3
Nagel et al., 2018	29942085	Neuroticism	Meta-analysis of GWAS	UKB, 23andMe, GPC1	449484	LRRC7
Nagel et al., 2018	29942085	Neuroticism	Meta-analysis of GWAS	UKB, 23andMe, GPC1	449484	ZKSCAN8
Nagel et al., 2018	29942085	Neuroticism	Meta-analysis of GWAS	UKB, 23andMe, GPC1	449484	NRXN1
Nagel et al., 2018	29942085	Neuroticism	Meta-analysis of GWAS	UKB, 23andMe, GPC1	449484	CTDP1
Nagel et al., 2018	29942085	Neuroticism	Meta-analysis of GWAS	UKB, 23andMe, GPC1	449484	ALAS1
Nagel et al., 2018	29942085	Neuroticism	Meta-analysis of GWAS	UKB, 23andMe, GPC1	449484	ESRRG
Nagel et al., 2018	29942085	Neuroticism	Meta-analysis of GWAS	UKB, 23andMe, GPC1	449484	AFTPH
Nagel et al., 2018	29942085	Neuroticism	Meta-analysis of GWAS	UKB, 23andMe, GPC1	449484	UBOX5
Nagel et al., 2018	29942085	Neuroticism	Meta-analysis of GWAS	UKB, 23andMe, GPC1	449484	MDGA1
Nagel et al., 2018	29942085	Neuroticism	Meta-analysis of GWAS	UKB, 23andMe, GPC1	449484	SP4
Nagel et al., 2018	29942085	Neuroticism	Meta-analysis of GWAS	UKB, 23andMe, GPC1	449484	GTF2H4
Nagel et al., 2018	29942085	Neuroticism	Meta-analysis of GWAS	UKB, 23andMe, GPC1	449484	PAFAH1B1
Nagel et al., 2018	29942085	Neuroticism	Meta-analysis of GWAS	UKB, 23andMe, GPC1	449484	SYT13
Nagel et al., 2018	29942085	Neuroticism	Meta-analysis of GWAS	UKB, 23andMe, GPC1	449484	USP35
Nagel et al., 2018	29942085	Neuroticism	Meta-analysis of GWAS	UKB, 23andMe, GPC1	449484	ESR1
Nagel et al., 2018	29942085	Neuroticism	Meta-analysis of GWAS	UKB, 23andMe, GPC1	449484	GPR37
Nagel et al., 2018	29942085	Neuroticism	Meta-analysis of GWAS	UKB, 23andMe, GPC1	449484	HCN1
Nagel et al., 2018	29942085	Neuroticism	Meta-analysis of GWAS	UKB, 23andMe, GPC1	449484	TRIM31
Nagel et al., 2018	29942085	Neuroticism	Meta-analysis of GWAS	UKB, 23andMe, GPC1	449484	KCNIP4
Nagel et al., 2018	29942085	Neuroticism	Meta-analysis of GWAS	UKB, 23andMe, GPC1	449484	SPCS1
Nagel et al., 2018	29942085	Neuroticism	Meta-analysis of GWAS	UKB, 23andMe, GPC1	449484	NARS2
Nagel et al., 2018	29942085	Neuroticism	Meta-analysis of GWAS	UKB, 23andMe, GPC1	449484	MTCH2
Nagel et al., 2018	29942085	Neuroticism	Meta-analysis of GWAS	UKB, 23andMe, GPC1	449484	ALK
Nagel et al., 2018	29942085	Neuroticism	Meta-analysis of GWAS	UKB, 23andMe, GPC1	449484	VRK2
Nagel et al., 2018	29942085	Neuroticism	Meta-analysis of GWAS	UKB, 23andMe, GPC1	449484	FBXL5
Nagel et al., 2018	29942085	Neuroticism	Meta-analysis of GWAS	UKB, 23andMe, GPC1	449484	ST8SIA1
Nagel et al., 2018	29942085	Neuroticism	Meta-analysis of GWAS	UKB, 23andMe, GPC1	449484	TSNARE1
Nagel et al., 2018	29942085	Neuroticism	Meta-analysis of GWAS	UKB, 23andMe, GPC1	449484	HSPA1A
Nagel et al., 2018	29942085	Neuroticism	Meta-analysis of GWAS	UKB, 23andMe, GPC1	449484	WDR12
Nagel et al., 2018	29942085	Neuroticism	Meta-analysis of GWAS	UKB, 23andMe, GPC1	449484	STK17A
Nagel et al., 2018	29942085	Neuroticism	Meta-analysis of GWAS	UKB, 23andMe, GPC1	449484	THADA
Nagel et al., 2018	29942085	Neuroticism	Meta-analysis of GWAS	UKB, 23andMe, GPC1	449484	HIST1H2BL
Nagel et al., 2018	29942085	Neuroticism	Meta-analysis of GWAS	UKB, 23andMe, GPC1	449484	CNPPD1
Nagel et al., 2018	29942085	Neuroticism	Meta-analysis of GWAS	UKB, 23andMe, GPC1	449484	HS3ST5
Nagel et al., 2018	29942085	Neuroticism	Meta-analysis of GWAS	UKB, 23andMe, GPC1	449484	ALG12
Nagel et al., 2018	29942085	Neuroticism	Meta-analysis of GWAS	UKB, 23andMe, GPC1	449484	SFTA2
Nagel et al., 2018	29942085	Neuroticism	Meta-analysis of GWAS	UKB, 23andMe, GPC1	449484	CTC1
Nagel et al., 2018	29942085	Neuroticism	Meta-analysis of GWAS	UKB, 23andMe, GPC1	449484	CYP17A1
Nagel et al., 2018	29942085	Neuroticism	Meta-analysis of GWAS	UKB, 23andMe, GPC1	449484	CMTR2
Nagel et al., 2018	29942085	Neuroticism	Meta-analysis of GWAS	UKB, 23andMe, GPC1	449484	CTU2
Nagel et al., 2018	29942085	Neuroticism	Meta-analysis of GWAS	UKB, 23andMe, GPC1	449484	B3GALTL
Nagel et al., 2018	29942085	Neuroticism	Meta-analysis of GWAS	UKB, 23andMe, GPC1	449484	LOC643355
Nagel et al., 2018	29942085	Neuroticism	Meta-analysis of GWAS	UKB, 23andMe, GPC1	449484	TRHR
Nagel et al., 2018	29942085	Neuroticism	Meta-analysis of GWAS	UKB, 23andMe, GPC1	449484	CHMP3
Nagel et al., 2018	29942085	Neuroticism	Meta-analysis of GWAS	UKB, 23andMe, GPC1	449484	FIGN
Nagel et al., 2018	29942085	Neuroticism	Meta-analysis of GWAS	UKB, 23andMe, GPC1	449484	NCOA6
Nagel et al., 2018	29942085	Neuroticism	Meta-analysis of GWAS	UKB, 23andMe, GPC1	449484	ATAD2B
Nagel et al., 2018	29942085	Neuroticism	Meta-analysis of GWAS	UKB, 23andMe, GPC1	449484	ATRN
Nagel et al., 2018	29942085	Neuroticism	Meta-analysis of GWAS	UKB, 23andMe, GPC1	449484	CYP21A2
Nagel et al., 2018	29942085	Neuroticism	Meta-analysis of GWAS	UKB, 23andMe, GPC1	449484	MED27
Nagel et al., 2018	29942085	Neuroticism	Meta-analysis of GWAS	UKB, 23andMe, GPC1	449484	RGS6
Nagel et al., 2018	29942085	Neuroticism	Meta-analysis of GWAS	UKB, 23andMe, GPC1	449484	EIF4G3
Nagel et al., 2018	29942085	Neuroticism	Meta-analysis of GWAS	UKB, 23andMe, GPC1	449484	C1QTNF7
Nagel et al., 2018	29942085	Neuroticism	Meta-analysis of GWAS	UKB, 23andMe, GPC1	449484	FAM227A
Nagel et al., 2018	29942085	Neuroticism	Meta-analysis of GWAS	UKB, 23andMe, GPC1	449484	ZNF165
Nagel et al., 2018	29942085	Neuroticism	Meta-analysis of GWAS	UKB, 23andMe, GPC1	449484	DDB2
Nagel et al., 2018	29942085	Neuroticism	Meta-analysis of GWAS	UKB, 23andMe, GPC1	449484	SYT16
Nagel et al., 2018	29942085	Neuroticism	Meta-analysis of GWAS	UKB, 23andMe, GPC1	449484	AGBL1
Nagel et al., 2018	29942085	Neuroticism	Meta-analysis of GWAS	UKB, 23andMe, GPC1	449484	CYS1
Nagel et al., 2018	29942085	Neuroticism	Meta-analysis of GWAS	UKB, 23andMe, GPC1	449484	GRM5
Nagel et al., 2018	29942085	Neuroticism	Meta-analysis of GWAS	UKB, 23andMe, GPC1	449484	FASTKD5
Nagel et al., 2018	29942085	Neuroticism	Meta-analysis of GWAS	UKB, 23andMe, GPC1	449484	GALNT16
Nagel et al., 2018	29942085	Neuroticism	Meta-analysis of GWAS	UKB, 23andMe, GPC1	449484	PSMD3
Nagel et al., 2018	29942085	Neuroticism	Meta-analysis of GWAS	UKB, 23andMe, GPC1	449484	MTMR3
Nagel et al., 2018	29942085	Neuroticism	Meta-analysis of GWAS	UKB, 23andMe, GPC1	449484	ICA1L
Nagel et al., 2018	29942085	Neuroticism	Meta-analysis of GWAS	UKB, 23andMe, GPC1	449484	TMEM55A
Nagel et al., 2018	29942085	Neuroticism	Meta-analysis of GWAS	UKB, 23andMe, GPC1	449484	CALN1
Nagel et al., 2018	29942085	Neuroticism	Meta-analysis of GWAS	UKB, 23andMe, GPC1	449484	DENND1B
Nagel et al., 2018	29942085	Neuroticism	Meta-analysis of GWAS	UKB, 23andMe, GPC1	449484	MSL2
Nagel et al., 2018	29942085	Neuroticism	Meta-analysis of GWAS	UKB, 23andMe, GPC1	449484	HIST1H4J
Nagel et al., 2018	29942085	Neuroticism	Meta-analysis of GWAS	UKB, 23andMe, GPC1	449484	HIST1H4K
Nagel et al., 2018	29942085	Neuroticism	Meta-analysis of GWAS	UKB, 23andMe, GPC1	449484	HIST1H2BO
Nagel et al., 2018	29942085	Neuroticism	Meta-analysis of GWAS	UKB, 23andMe, GPC1	449484	LMTK2
Nagel et al., 2018	29942085	Neuroticism	Meta-analysis of GWAS	UKB, 23andMe, GPC1	449484	BLK
Nagel et al., 2018	29942085	Neuroticism	Meta-analysis of GWAS	UKB, 23andMe, GPC1	449484	TLR4
Nagel et al., 2018	29942085	Neuroticism	Meta-analysis of GWAS	UKB, 23andMe, GPC1	449484	ACP2
Nagel et al., 2018	29942085	Neuroticism	Meta-analysis of GWAS	UKB, 23andMe, GPC1	449484	NR1H3
Nagel et al., 2018	29942085	Neuroticism	Meta-analysis of GWAS	UKB, 23andMe, GPC1	449484	NDUFS3
Nagel et al., 2018	29942085	Neuroticism	Meta-analysis of GWAS	UKB, 23andMe, GPC1	449484	PTPMT1
Nagel et al., 2018	29942085	Neuroticism	Meta-analysis of GWAS	UKB, 23andMe, GPC1	449484	CLP1
Nagel et al., 2018	29942085	Neuroticism	Meta-analysis of GWAS	UKB, 23andMe, GPC1	449484	LINGO1
Nagel et al., 2018	29942085	Neuroticism	Meta-analysis of GWAS	UKB, 23andMe, GPC1	449484	ITCH
Nagel et al., 2018	29942085	Neuroticism	Meta-analysis of GWAS	UKB, 23andMe, GPC1	449484	GGT7
Nagel et al., 2018	29942085	Neuroticism	Meta-analysis of GWAS	UKB, 23andMe, GPC1	449484	TRPC4AP
Nagel et al., 2018	29942085	Neuroticism	Meta-analysis of GWAS	UKB, 23andMe, GPC1	449484	SLC25A17
Nagel et al., 2018	29942085	Neuroticism	Meta-analysis of GWAS	UKB, 23andMe, GPC1	449484	DESI1
Nagel et al., 2018	29942085	Neuroticism	Meta-analysis of GWAS	UKB, 23andMe, GPC1	449484	XRCC6
Nagel et al., 2018	29942085	Neuroticism	Meta-analysis of GWAS	UKB, 23andMe, GPC1	449484	VAMP3
Nagel et al., 2018	29942085	Neuroticism	Meta-analysis of GWAS	UKB, 23andMe, GPC1	449484	IPO9
Nagel et al., 2018	29942085	Neuroticism	Meta-analysis of GWAS	UKB, 23andMe, GPC1	449484	REEP1
Nagel et al., 2018	29942085	Neuroticism	Meta-analysis of GWAS	UKB, 23andMe, GPC1	449484	SMIM4
Nagel et al., 2018	29942085	Neuroticism	Meta-analysis of GWAS	UKB, 23andMe, GPC1	449484	NCK1
Nagel et al., 2018	29942085	Neuroticism	Meta-analysis of GWAS	UKB, 23andMe, GPC1	449484	RSRC1
Nagel et al., 2018	29942085	Neuroticism	Meta-analysis of GWAS	UKB, 23andMe, GPC1	449484	HIST1H4C
Nagel et al., 2018	29942085	Neuroticism	Meta-analysis of GWAS	UKB, 23andMe, GPC1	449484	HIST1H2AJ
Nagel et al., 2018	29942085	Neuroticism	Meta-analysis of GWAS	UKB, 23andMe, GPC1	449484	HIST1H2BM
Nagel et al., 2018	29942085	Neuroticism	Meta-analysis of GWAS	UKB, 23andMe, GPC1	449484	HIST1H2AK
Nagel et al., 2018	29942085	Neuroticism	Meta-analysis of GWAS	UKB, 23andMe, GPC1	449484	HIST1H2AL
Nagel et al., 2018	29942085	Neuroticism	Meta-analysis of GWAS	UKB, 23andMe, GPC1	449484	HIST1H1B
Nagel et al., 2018	29942085	Neuroticism	Meta-analysis of GWAS	UKB, 23andMe, GPC1	449484	HIST1H3I
Nagel et al., 2018	29942085	Neuroticism	Meta-analysis of GWAS	UKB, 23andMe, GPC1	449484	HIST1H2AM
Nagel et al., 2018	29942085	Neuroticism	Meta-analysis of GWAS	UKB, 23andMe, GPC1	449484	MTMR9
Nagel et al., 2018	29942085	Neuroticism	Meta-analysis of GWAS	UKB, 23andMe, GPC1	449484	BORCS7
Nagel et al., 2018	29942085	Neuroticism	Meta-analysis of GWAS	UKB, 23andMe, GPC1	449484	KBTBD4
Nagel et al., 2018	29942085	Neuroticism	Meta-analysis of GWAS	UKB, 23andMe, GPC1	449484	YPEL4
Nagel et al., 2018	29942085	Neuroticism	Meta-analysis of GWAS	UKB, 23andMe, GPC1	449484	TMX2-CTNND1
Nagel et al., 2018	29942085	Neuroticism	Meta-analysis of GWAS	UKB, 23andMe, GPC1	449484	VSIG10
Nagel et al., 2018	29942085	Neuroticism	Meta-analysis of GWAS	UKB, 23andMe, GPC1	449484	PEBP1
Nagel et al., 2018	29942085	Neuroticism	Meta-analysis of GWAS	UKB, 23andMe, GPC1	449484	SIPA1L1
Nagel et al., 2018	29942085	Neuroticism	Meta-analysis of GWAS	UKB, 23andMe, GPC1	449484	PGF
Nagel et al., 2018	29942085	Neuroticism	Meta-analysis of GWAS	UKB, 23andMe, GPC1	449484	DYNLRB1
Nagel et al., 2018	29942085	Neuroticism	Meta-analysis of GWAS	UKB, 23andMe, GPC1	449484	TP53INP2
Nagel et al., 2018	29942085	Neuroticism	Meta-analysis of GWAS	UKB, 23andMe, GPC1	449484	ACSS2
Nagel et al., 2018	29942085	Neuroticism	Meta-analysis of GWAS	UKB, 23andMe, GPC1	449484	RBX1
Nagel et al., 2018	29942085	Neuroticism	Meta-analysis of GWAS	UKB, 23andMe, GPC1	449484	C22orf46
Nagel et al., 2018	29942085	Neuroticism	Meta-analysis of GWAS	UKB, 23andMe, GPC1	449484	SREBF2
Nagel et al., 2018	29942085	Neuroticism	Meta-analysis of GWAS	UKB, 23andMe, GPC1	449484	FANCL
Nagel et al., 2018	29942085	Neuroticism	Meta-analysis of GWAS	UKB, 23andMe, GPC1	449484	LSMEM2
Nagel et al., 2018	29942085	Neuroticism	Meta-analysis of GWAS	UKB, 23andMe, GPC1	449484	IFRD2
Nagel et al., 2018	29942085	Neuroticism	Meta-analysis of GWAS	UKB, 23andMe, GPC1	449484	HYAL3
Nagel et al., 2018	29942085	Neuroticism	Meta-analysis of GWAS	UKB, 23andMe, GPC1	449484	HYAL1
Nagel et al., 2018	29942085	Neuroticism	Meta-analysis of GWAS	UKB, 23andMe, GPC1	449484	CYB561D2
Nagel et al., 2018	29942085	Neuroticism	Meta-analysis of GWAS	UKB, 23andMe, GPC1	449484	CACNA2D2
Nagel et al., 2018	29942085	Neuroticism	Meta-analysis of GWAS	UKB, 23andMe, GPC1	449484	ITIH3
Nagel et al., 2018	29942085	Neuroticism	Meta-analysis of GWAS	UKB, 23andMe, GPC1	449484	PPP2R3A
Nagel et al., 2018	29942085	Neuroticism	Meta-analysis of GWAS	UKB, 23andMe, GPC1	449484	SLC35G2
Nagel et al., 2018	29942085	Neuroticism	Meta-analysis of GWAS	UKB, 23andMe, GPC1	449484	TMEM33
Nagel et al., 2018	29942085	Neuroticism	Meta-analysis of GWAS	UKB, 23andMe, GPC1	449484	MMRN1
Nagel et al., 2018	29942085	Neuroticism	Meta-analysis of GWAS	UKB, 23andMe, GPC1	449484	GPM6A
Nagel et al., 2018	29942085	Neuroticism	Meta-analysis of GWAS	UKB, 23andMe, GPC1	449484	HIVEP1
Nagel et al., 2018	29942085	Neuroticism	Meta-analysis of GWAS	UKB, 23andMe, GPC1	449484	HIST1H1T
Nagel et al., 2018	29942085	Neuroticism	Meta-analysis of GWAS	UKB, 23andMe, GPC1	449484	MAD1L1
Nagel et al., 2018	29942085	Neuroticism	Meta-analysis of GWAS	UKB, 23andMe, GPC1	449484	FAM167A
Nagel et al., 2018	29942085	Neuroticism	Meta-analysis of GWAS	UKB, 23andMe, GPC1	449484	WBP1L
Nagel et al., 2018	29942085	Neuroticism	Meta-analysis of GWAS	UKB, 23andMe, GPC1	449484	FAM180B
Nagel et al., 2018	29942085	Neuroticism	Meta-analysis of GWAS	UKB, 23andMe, GPC1	449484	PTPRJ
Nagel et al., 2018	29942085	Neuroticism	Meta-analysis of GWAS	UKB, 23andMe, GPC1	449484	TYR
Nagel et al., 2018	29942085	Neuroticism	Meta-analysis of GWAS	UKB, 23andMe, GPC1	449484	FARP1
Nagel et al., 2018	29942085	Neuroticism	Meta-analysis of GWAS	UKB, 23andMe, GPC1	449484	SLC7A8
Nagel et al., 2018	29942085	Neuroticism	Meta-analysis of GWAS	UKB, 23andMe, GPC1	449484	LTBP2
Nagel et al., 2018	29942085	Neuroticism	Meta-analysis of GWAS	UKB, 23andMe, GPC1	449484	CSNK1G1
Nagel et al., 2018	29942085	Neuroticism	Meta-analysis of GWAS	UKB, 23andMe, GPC1	449484	ORAI3
Nagel et al., 2018	29942085	Neuroticism	Meta-analysis of GWAS	UKB, 23andMe, GPC1	449484	CBFA2T3
Nagel et al., 2018	29942085	Neuroticism	Meta-analysis of GWAS	UKB, 23andMe, GPC1	449484	GSDMA
Nagel et al., 2018	29942085	Neuroticism	Meta-analysis of GWAS	UKB, 23andMe, GPC1	449484	THRA
Nagel et al., 2018	29942085	Neuroticism	Meta-analysis of GWAS	UKB, 23andMe, GPC1	449484	MYH7B
Nagel et al., 2018	29942085	Neuroticism	Meta-analysis of GWAS	UKB, 23andMe, GPC1	449484	SLC12A5
Nagel et al., 2018	29942085	Neuroticism	Meta-analysis of GWAS	UKB, 23andMe, GPC1	449484	XPNPEP3
Nagel et al., 2018	29942085	Neuroticism	Meta-analysis of GWAS	UKB, 23andMe, GPC1	449484	PMM1
Nagel et al., 2018	29942085	Neuroticism	Meta-analysis of GWAS	UKB, 23andMe, GPC1	449484	RNF103
Nagel et al., 2018	29942085	Neuroticism	Meta-analysis of GWAS	UKB, 23andMe, GPC1	449484	GNAT1
Nagel et al., 2018	29942085	Neuroticism	Meta-analysis of GWAS	UKB, 23andMe, GPC1	449484	HIST1H2AI
Nagel et al., 2018	29942085	Neuroticism	Meta-analysis of GWAS	UKB, 23andMe, GPC1	449484	HIST1H3H
Nagel et al., 2018	29942085	Neuroticism	Meta-analysis of GWAS	UKB, 23andMe, GPC1	449484	HIST1H4L
Nagel et al., 2018	29942085	Neuroticism	Meta-analysis of GWAS	UKB, 23andMe, GPC1	449484	PARK7
Nagel et al., 2018	29942085	Neuroticism	Meta-analysis of GWAS	UKB, 23andMe, GPC1	449484	GRIK3
Nagel et al., 2018	29942085	Neuroticism	Meta-analysis of GWAS	UKB, 23andMe, GPC1	449484	AGBL4
Nagel et al., 2018	29942085	Neuroticism	Meta-analysis of GWAS	UKB, 23andMe, GPC1	449484	CRYZ
Nagel et al., 2018	29942085	Neuroticism	Meta-analysis of GWAS	UKB, 23andMe, GPC1	449484	SLC44A5
Nagel et al., 2018	29942085	Neuroticism	Meta-analysis of GWAS	UKB, 23andMe, GPC1	449484	ANKRD45
Nagel et al., 2018	29942085	Neuroticism	Meta-analysis of GWAS	UKB, 23andMe, GPC1	449484	DARS2
Nagel et al., 2018	29942085	Neuroticism	Meta-analysis of GWAS	UKB, 23andMe, GPC1	449484	SERPINC1
Nagel et al., 2018	29942085	Neuroticism	Meta-analysis of GWAS	UKB, 23andMe, GPC1	449484	RC3H1
Nagel et al., 2018	29942085	Neuroticism	Meta-analysis of GWAS	UKB, 23andMe, GPC1	449484	CACYBP
Nagel et al., 2018	29942085	Neuroticism	Meta-analysis of GWAS	UKB, 23andMe, GPC1	449484	MRPS14
Nagel et al., 2018	29942085	Neuroticism	Meta-analysis of GWAS	UKB, 23andMe, GPC1	449484	CFHR3
Nagel et al., 2018	29942085	Neuroticism	Meta-analysis of GWAS	UKB, 23andMe, GPC1	449484	CRB1
Nagel et al., 2018	29942085	Neuroticism	Meta-analysis of GWAS	UKB, 23andMe, GPC1	449484	NEK7
Nagel et al., 2018	29942085	Neuroticism	Meta-analysis of GWAS	UKB, 23andMe, GPC1	449484	NAV1
Nagel et al., 2018	29942085	Neuroticism	Meta-analysis of GWAS	UKB, 23andMe, GPC1	449484	SHISA4
Nagel et al., 2018	29942085	Neuroticism	Meta-analysis of GWAS	UKB, 23andMe, GPC1	449484	FKBP1B
Nagel et al., 2018	29942085	Neuroticism	Meta-analysis of GWAS	UKB, 23andMe, GPC1	449484	FAM228B
Nagel et al., 2018	29942085	Neuroticism	Meta-analysis of GWAS	UKB, 23andMe, GPC1	449484	TP53I3
Nagel et al., 2018	29942085	Neuroticism	Meta-analysis of GWAS	UKB, 23andMe, GPC1	449484	FAM228A
Nagel et al., 2018	29942085	Neuroticism	Meta-analysis of GWAS	UKB, 23andMe, GPC1	449484	IMMT
Nagel et al., 2018	29942085	Neuroticism	Meta-analysis of GWAS	UKB, 23andMe, GPC1	449484	RNF103-CHMP3
Nagel et al., 2018	29942085	Neuroticism	Meta-analysis of GWAS	UKB, 23andMe, GPC1	449484	CD8A
Nagel et al., 2018	29942085	Neuroticism	Meta-analysis of GWAS	UKB, 23andMe, GPC1	449484	PLGLB1
Nagel et al., 2018	29942085	Neuroticism	Meta-analysis of GWAS	UKB, 23andMe, GPC1	449484	ARHGAP15
Nagel et al., 2018	29942085	Neuroticism	Meta-analysis of GWAS	UKB, 23andMe, GPC1	449484	ZNF804A
Nagel et al., 2018	29942085	Neuroticism	Meta-analysis of GWAS	UKB, 23andMe, GPC1	449484	BARD1
Nagel et al., 2018	29942085	Neuroticism	Meta-analysis of GWAS	UKB, 23andMe, GPC1	449484	FN1
Nagel et al., 2018	29942085	Neuroticism	Meta-analysis of GWAS	UKB, 23andMe, GPC1	449484	DAZL
Nagel et al., 2018	29942085	Neuroticism	Meta-analysis of GWAS	UKB, 23andMe, GPC1	449484	PLCL2
Nagel et al., 2018	29942085	Neuroticism	Meta-analysis of GWAS	UKB, 23andMe, GPC1	449484	APEH
Nagel et al., 2018	29942085	Neuroticism	Meta-analysis of GWAS	UKB, 23andMe, GPC1	449484	RBM6
Nagel et al., 2018	29942085	Neuroticism	Meta-analysis of GWAS	UKB, 23andMe, GPC1	449484	SEMA3F
Nagel et al., 2018	29942085	Neuroticism	Meta-analysis of GWAS	UKB, 23andMe, GPC1	449484	TMEM115
Nagel et al., 2018	29942085	Neuroticism	Meta-analysis of GWAS	UKB, 23andMe, GPC1	449484	C3orf18
Nagel et al., 2018	29942085	Neuroticism	Meta-analysis of GWAS	UKB, 23andMe, GPC1	449484	HEMK1
Nagel et al., 2018	29942085	Neuroticism	Meta-analysis of GWAS	UKB, 23andMe, GPC1	449484	PCBP4
Nagel et al., 2018	29942085	Neuroticism	Meta-analysis of GWAS	UKB, 23andMe, GPC1	449484	PPM1M
Nagel et al., 2018	29942085	Neuroticism	Meta-analysis of GWAS	UKB, 23andMe, GPC1	449484	WDR82
Nagel et al., 2018	29942085	Neuroticism	Meta-analysis of GWAS	UKB, 23andMe, GPC1	449484	GLYCTK
Nagel et al., 2018	29942085	Neuroticism	Meta-analysis of GWAS	UKB, 23andMe, GPC1	449484	DNAH1
Nagel et al., 2018	29942085	Neuroticism	Meta-analysis of GWAS	UKB, 23andMe, GPC1	449484	NISCH
Nagel et al., 2018	29942085	Neuroticism	Meta-analysis of GWAS	UKB, 23andMe, GPC1	449484	ITIH4
Nagel et al., 2018	29942085	Neuroticism	Meta-analysis of GWAS	UKB, 23andMe, GPC1	449484	MUSTN1
Nagel et al., 2018	29942085	Neuroticism	Meta-analysis of GWAS	UKB, 23andMe, GPC1	449484	TMEM110-MUSTN1
Nagel et al., 2018	29942085	Neuroticism	Meta-analysis of GWAS	UKB, 23andMe, GPC1	449484	TMEM110
Nagel et al., 2018	29942085	Neuroticism	Meta-analysis of GWAS	UKB, 23andMe, GPC1	449484	CCDC54
Nagel et al., 2018	29942085	Neuroticism	Meta-analysis of GWAS	UKB, 23andMe, GPC1	449484	LSAMP
Nagel et al., 2018	29942085	Neuroticism	Meta-analysis of GWAS	UKB, 23andMe, GPC1	449484	IL20RB
Nagel et al., 2018	29942085	Neuroticism	Meta-analysis of GWAS	UKB, 23andMe, GPC1	449484	MLF1
Nagel et al., 2018	29942085	Neuroticism	Meta-analysis of GWAS	UKB, 23andMe, GPC1	449484	GFM1
Nagel et al., 2018	29942085	Neuroticism	Meta-analysis of GWAS	UKB, 23andMe, GPC1	449484	LXN
Nagel et al., 2018	29942085	Neuroticism	Meta-analysis of GWAS	UKB, 23andMe, GPC1	449484	METTL14
Nagel et al., 2018	29942085	Neuroticism	Meta-analysis of GWAS	UKB, 23andMe, GPC1	449484	SLC7A11
Nagel et al., 2018	29942085	Neuroticism	Meta-analysis of GWAS	UKB, 23andMe, GPC1	449484	MEF2C
Nagel et al., 2018	29942085	Neuroticism	Meta-analysis of GWAS	UKB, 23andMe, GPC1	449484	COMMD10
Nagel et al., 2018	29942085	Neuroticism	Meta-analysis of GWAS	UKB, 23andMe, GPC1	449484	TRIM38
Nagel et al., 2018	29942085	Neuroticism	Meta-analysis of GWAS	UKB, 23andMe, GPC1	449484	HIST1H3B
Nagel et al., 2018	29942085	Neuroticism	Meta-analysis of GWAS	UKB, 23andMe, GPC1	449484	HIST1H1C
Nagel et al., 2018	29942085	Neuroticism	Meta-analysis of GWAS	UKB, 23andMe, GPC1	449484	HIST1H1E
Nagel et al., 2018	29942085	Neuroticism	Meta-analysis of GWAS	UKB, 23andMe, GPC1	449484	HIST1H3E
Nagel et al., 2018	29942085	Neuroticism	Meta-analysis of GWAS	UKB, 23andMe, GPC1	449484	BTN3A2
Nagel et al., 2018	29942085	Neuroticism	Meta-analysis of GWAS	UKB, 23andMe, GPC1	449484	PRSS16
Nagel et al., 2018	29942085	Neuroticism	Meta-analysis of GWAS	UKB, 23andMe, GPC1	449484	ZNF391
Nagel et al., 2018	29942085	Neuroticism	Meta-analysis of GWAS	UKB, 23andMe, GPC1	449484	ZNF184
Nagel et al., 2018	29942085	Neuroticism	Meta-analysis of GWAS	UKB, 23andMe, GPC1	449484	ZSCAN9
Nagel et al., 2018	29942085	Neuroticism	Meta-analysis of GWAS	UKB, 23andMe, GPC1	449484	ZKSCAN4
Nagel et al., 2018	29942085	Neuroticism	Meta-analysis of GWAS	UKB, 23andMe, GPC1	449484	PGBD1
Nagel et al., 2018	29942085	Neuroticism	Meta-analysis of GWAS	UKB, 23andMe, GPC1	449484	ZSCAN31
Nagel et al., 2018	29942085	Neuroticism	Meta-analysis of GWAS	UKB, 23andMe, GPC1	449484	ZKSCAN3
Nagel et al., 2018	29942085	Neuroticism	Meta-analysis of GWAS	UKB, 23andMe, GPC1	449484	ZSCAN23
Nagel et al., 2018	29942085	Neuroticism	Meta-analysis of GWAS	UKB, 23andMe, GPC1	449484	TRIM27
Nagel et al., 2018	29942085	Neuroticism	Meta-analysis of GWAS	UKB, 23andMe, GPC1	449484	OR11A1
Nagel et al., 2018	29942085	Neuroticism	Meta-analysis of GWAS	UKB, 23andMe, GPC1	449484	GABBR1
Nagel et al., 2018	29942085	Neuroticism	Meta-analysis of GWAS	UKB, 23andMe, GPC1	449484	FBXL4
Nagel et al., 2018	29942085	Neuroticism	Meta-analysis of GWAS	UKB, 23andMe, GPC1	449484	ELFN1
Nagel et al., 2018	29942085	Neuroticism	Meta-analysis of GWAS	UKB, 23andMe, GPC1	449484	MRM2
Nagel et al., 2018	29942085	Neuroticism	Meta-analysis of GWAS	UKB, 23andMe, GPC1	449484	DNAH11
Nagel et al., 2018	29942085	Neuroticism	Meta-analysis of GWAS	UKB, 23andMe, GPC1	449484	FAM183BP
Nagel et al., 2018	29942085	Neuroticism	Meta-analysis of GWAS	UKB, 23andMe, GPC1	449484	GRM3
Nagel et al., 2018	29942085	Neuroticism	Meta-analysis of GWAS	UKB, 23andMe, GPC1	449484	ASNS
Nagel et al., 2018	29942085	Neuroticism	Meta-analysis of GWAS	UKB, 23andMe, GPC1	449484	BHLHA15
Nagel et al., 2018	29942085	Neuroticism	Meta-analysis of GWAS	UKB, 23andMe, GPC1	449484	GCC1
Nagel et al., 2018	29942085	Neuroticism	Meta-analysis of GWAS	UKB, 23andMe, GPC1	449484	LRLE1
Nagel et al., 2018	29942085	Neuroticism	Meta-analysis of GWAS	UKB, 23andMe, GPC1	449484	SGK223
Nagel et al., 2018	29942085	Neuroticism	Meta-analysis of GWAS	UKB, 23andMe, GPC1	449484	CLDN23
Nagel et al., 2018	29942085	Neuroticism	Meta-analysis of GWAS	UKB, 23andMe, GPC1	449484	ERI1
Nagel et al., 2018	29942085	Neuroticism	Meta-analysis of GWAS	UKB, 23andMe, GPC1	449484	RP1L1
Nagel et al., 2018	29942085	Neuroticism	Meta-analysis of GWAS	UKB, 23andMe, GPC1	449484	SLC35G5
Nagel et al., 2018	29942085	Neuroticism	Meta-analysis of GWAS	UKB, 23andMe, GPC1	449484	FAM167A-AS1
Nagel et al., 2018	29942085	Neuroticism	Meta-analysis of GWAS	UKB, 23andMe, GPC1	449484	NEIL2
Nagel et al., 2018	29942085	Neuroticism	Meta-analysis of GWAS	UKB, 23andMe, GPC1	449484	FDFT1
Nagel et al., 2018	29942085	Neuroticism	Meta-analysis of GWAS	UKB, 23andMe, GPC1	449484	CTSB
Nagel et al., 2018	29942085	Neuroticism	Meta-analysis of GWAS	UKB, 23andMe, GPC1	449484	DEFB134
Nagel et al., 2018	29942085	Neuroticism	Meta-analysis of GWAS	UKB, 23andMe, GPC1	449484	CYP7B1
Nagel et al., 2018	29942085	Neuroticism	Meta-analysis of GWAS	UKB, 23andMe, GPC1	449484	ADGRB1
Nagel et al., 2018	29942085	Neuroticism	Meta-analysis of GWAS	UKB, 23andMe, GPC1	449484	WNK2
Nagel et al., 2018	29942085	Neuroticism	Meta-analysis of GWAS	UKB, 23andMe, GPC1	449484	C9orf129
Nagel et al., 2018	29942085	Neuroticism	Meta-analysis of GWAS	UKB, 23andMe, GPC1	449484	MFSD13A
Nagel et al., 2018	29942085	Neuroticism	Meta-analysis of GWAS	UKB, 23andMe, GPC1	449484	ARL3
Nagel et al., 2018	29942085	Neuroticism	Meta-analysis of GWAS	UKB, 23andMe, GPC1	449484	SFXN2
Nagel et al., 2018	29942085	Neuroticism	Meta-analysis of GWAS	UKB, 23andMe, GPC1	449484	USMG5
Nagel et al., 2018	29942085	Neuroticism	Meta-analysis of GWAS	UKB, 23andMe, GPC1	449484	PDZD8
Nagel et al., 2018	29942085	Neuroticism	Meta-analysis of GWAS	UKB, 23andMe, GPC1	449484	BTBD10
Nagel et al., 2018	29942085	Neuroticism	Meta-analysis of GWAS	UKB, 23andMe, GPC1	449484	RCN1
Nagel et al., 2018	29942085	Neuroticism	Meta-analysis of GWAS	UKB, 23andMe, GPC1	449484	HARBI1
Nagel et al., 2018	29942085	Neuroticism	Meta-analysis of GWAS	UKB, 23andMe, GPC1	449484	ARHGAP1
Nagel et al., 2018	29942085	Neuroticism	Meta-analysis of GWAS	UKB, 23andMe, GPC1	449484	F2
Nagel et al., 2018	29942085	Neuroticism	Meta-analysis of GWAS	UKB, 23andMe, GPC1	449484	P2RX3
Nagel et al., 2018	29942085	Neuroticism	Meta-analysis of GWAS	UKB, 23andMe, GPC1	449484	SLC43A3
Nagel et al., 2018	29942085	Neuroticism	Meta-analysis of GWAS	UKB, 23andMe, GPC1	449484	TIMM10
Nagel et al., 2018	29942085	Neuroticism	Meta-analysis of GWAS	UKB, 23andMe, GPC1	449484	SMTNL1
Nagel et al., 2018	29942085	Neuroticism	Meta-analysis of GWAS	UKB, 23andMe, GPC1	449484	UBE2L6
Nagel et al., 2018	29942085	Neuroticism	Meta-analysis of GWAS	UKB, 23andMe, GPC1	449484	TMPRSS5
Nagel et al., 2018	29942085	Neuroticism	Meta-analysis of GWAS	UKB, 23andMe, GPC1	449484	UNG
Nagel et al., 2018	29942085	Neuroticism	Meta-analysis of GWAS	UKB, 23andMe, GPC1	449484	ACACB
Nagel et al., 2018	29942085	Neuroticism	Meta-analysis of GWAS	UKB, 23andMe, GPC1	449484	FOXN4
Nagel et al., 2018	29942085	Neuroticism	Meta-analysis of GWAS	UKB, 23andMe, GPC1	449484	FAM216A
Nagel et al., 2018	29942085	Neuroticism	Meta-analysis of GWAS	UKB, 23andMe, GPC1	449484	FBXO21
Nagel et al., 2018	29942085	Neuroticism	Meta-analysis of GWAS	UKB, 23andMe, GPC1	449484	RFC5
Nagel et al., 2018	29942085	Neuroticism	Meta-analysis of GWAS	UKB, 23andMe, GPC1	449484	WSB2
Nagel et al., 2018	29942085	Neuroticism	Meta-analysis of GWAS	UKB, 23andMe, GPC1	449484	ACTN1
Nagel et al., 2018	29942085	Neuroticism	Meta-analysis of GWAS	UKB, 23andMe, GPC1	449484	ISCA2
Nagel et al., 2018	29942085	Neuroticism	Meta-analysis of GWAS	UKB, 23andMe, GPC1	449484	EIF2B2
Nagel et al., 2018	29942085	Neuroticism	Meta-analysis of GWAS	UKB, 23andMe, GPC1	449484	MLH3
Nagel et al., 2018	29942085	Neuroticism	Meta-analysis of GWAS	UKB, 23andMe, GPC1	449484	ACYP1
Nagel et al., 2018	29942085	Neuroticism	Meta-analysis of GWAS	UKB, 23andMe, GPC1	449484	ZC2HC1C
Nagel et al., 2018	29942085	Neuroticism	Meta-analysis of GWAS	UKB, 23andMe, GPC1	449484	NEK9
Nagel et al., 2018	29942085	Neuroticism	Meta-analysis of GWAS	UKB, 23andMe, GPC1	449484	SNX1
Nagel et al., 2018	29942085	Neuroticism	Meta-analysis of GWAS	UKB, 23andMe, GPC1	449484	KIAA0101
Nagel et al., 2018	29942085	Neuroticism	Meta-analysis of GWAS	UKB, 23andMe, GPC1	449484	ZNF609
Nagel et al., 2018	29942085	Neuroticism	Meta-analysis of GWAS	UKB, 23andMe, GPC1	449484	PRR14
Nagel et al., 2018	29942085	Neuroticism	Meta-analysis of GWAS	UKB, 23andMe, GPC1	449484	CCDC189
Nagel et al., 2018	29942085	Neuroticism	Meta-analysis of GWAS	UKB, 23andMe, GPC1	449484	RNF40
Nagel et al., 2018	29942085	Neuroticism	Meta-analysis of GWAS	UKB, 23andMe, GPC1	449484	PRSS36
Nagel et al., 2018	29942085	Neuroticism	Meta-analysis of GWAS	UKB, 23andMe, GPC1	449484	ITGAX
Nagel et al., 2018	29942085	Neuroticism	Meta-analysis of GWAS	UKB, 23andMe, GPC1	449484	ZNF23
Nagel et al., 2018	29942085	Neuroticism	Meta-analysis of GWAS	UKB, 23andMe, GPC1	449484	TAT
Nagel et al., 2018	29942085	Neuroticism	Meta-analysis of GWAS	UKB, 23andMe, GPC1	449484	DHODH
Nagel et al., 2018	29942085	Neuroticism	Meta-analysis of GWAS	UKB, 23andMe, GPC1	449484	SNAI3
Nagel et al., 2018	29942085	Neuroticism	Meta-analysis of GWAS	UKB, 23andMe, GPC1	449484	GALNS
Nagel et al., 2018	29942085	Neuroticism	Meta-analysis of GWAS	UKB, 23andMe, GPC1	449484	TRAPPC2L
Nagel et al., 2018	29942085	Neuroticism	Meta-analysis of GWAS	UKB, 23andMe, GPC1	449484	PABPN1L
Nagel et al., 2018	29942085	Neuroticism	Meta-analysis of GWAS	UKB, 23andMe, GPC1	449484	CDK10
Nagel et al., 2018	29942085	Neuroticism	Meta-analysis of GWAS	UKB, 23andMe, GPC1	449484	METTL16
Nagel et al., 2018	29942085	Neuroticism	Meta-analysis of GWAS	UKB, 23andMe, GPC1	449484	ZPBP2
Nagel et al., 2018	29942085	Neuroticism	Meta-analysis of GWAS	UKB, 23andMe, GPC1	449484	GSDMB
Nagel et al., 2018	29942085	Neuroticism	Meta-analysis of GWAS	UKB, 23andMe, GPC1	449484	ORMDL3
Nagel et al., 2018	29942085	Neuroticism	Meta-analysis of GWAS	UKB, 23andMe, GPC1	449484	CSF3
Nagel et al., 2018	29942085	Neuroticism	Meta-analysis of GWAS	UKB, 23andMe, GPC1	449484	NR1D1
Nagel et al., 2018	29942085	Neuroticism	Meta-analysis of GWAS	UKB, 23andMe, GPC1	449484	ACBD4
Nagel et al., 2018	29942085	Neuroticism	Meta-analysis of GWAS	UKB, 23andMe, GPC1	449484	FMNL1
Nagel et al., 2018	29942085	Neuroticism	Meta-analysis of GWAS	UKB, 23andMe, GPC1	449484	SPATA32
Nagel et al., 2018	29942085	Neuroticism	Meta-analysis of GWAS	UKB, 23andMe, GPC1	449484	LRRC37A2
Nagel et al., 2018	29942085	Neuroticism	Meta-analysis of GWAS	UKB, 23andMe, GPC1	449484	ARL17A
Nagel et al., 2018	29942085	Neuroticism	Meta-analysis of GWAS	UKB, 23andMe, GPC1	449484	GOSR2
Nagel et al., 2018	29942085	Neuroticism	Meta-analysis of GWAS	UKB, 23andMe, GPC1	449484	HOXB2
Nagel et al., 2018	29942085	Neuroticism	Meta-analysis of GWAS	UKB, 23andMe, GPC1	449484	HOXB7
Nagel et al., 2018	29942085	Neuroticism	Meta-analysis of GWAS	UKB, 23andMe, GPC1	449484	NDUFAF8
Nagel et al., 2018	29942085	Neuroticism	Meta-analysis of GWAS	UKB, 23andMe, GPC1	449484	ZNF536
Nagel et al., 2018	29942085	Neuroticism	Meta-analysis of GWAS	UKB, 23andMe, GPC1	449484	PXMP4
Nagel et al., 2018	29942085	Neuroticism	Meta-analysis of GWAS	UKB, 23andMe, GPC1	449484	ZNF341
Nagel et al., 2018	29942085	Neuroticism	Meta-analysis of GWAS	UKB, 23andMe, GPC1	449484	ASIP
Nagel et al., 2018	29942085	Neuroticism	Meta-analysis of GWAS	UKB, 23andMe, GPC1	449484	GSS
Nagel et al., 2018	29942085	Neuroticism	Meta-analysis of GWAS	UKB, 23andMe, GPC1	449484	EDEM2
Nagel et al., 2018	29942085	Neuroticism	Meta-analysis of GWAS	UKB, 23andMe, GPC1	449484	MMP24
Nagel et al., 2018	29942085	Neuroticism	Meta-analysis of GWAS	UKB, 23andMe, GPC1	449484	PLTP
Nagel et al., 2018	29942085	Neuroticism	Meta-analysis of GWAS	UKB, 23andMe, GPC1	449484	SLC35C2
Nagel et al., 2018	29942085	Neuroticism	Meta-analysis of GWAS	UKB, 23andMe, GPC1	449484	MKL1
Nagel et al., 2018	29942085	Neuroticism	Meta-analysis of GWAS	UKB, 23andMe, GPC1	449484	MCHR1
Nagel et al., 2018	29942085	Neuroticism	Meta-analysis of GWAS	UKB, 23andMe, GPC1	449484	DNAJB7
Nagel et al., 2018	29942085	Neuroticism	Meta-analysis of GWAS	UKB, 23andMe, GPC1	449484	CENPM
Nagel et al., 2018	29942085	Neuroticism	Meta-analysis of GWAS	UKB, 23andMe, GPC1	449484	WBP2NL
Nagel et al., 2018	29942085	Neuroticism	Meta-analysis of GWAS	UKB, 23andMe, GPC1	449484	NAGA
Nagel et al., 2018	29942085	Neuroticism	Meta-analysis of GWAS	UKB, 23andMe, GPC1	449484	SMDT1
Nagel et al., 2018	29942085	Neuroticism	Meta-analysis of GWAS	UKB, 23andMe, GPC1	449484	CYP2D6

## Sheet: SupplementaryTable3_genesets
Supplementary Table 3: gene sets significantly associated with the phenotypes of interest
Author, year	PMID	Phenotype/outcome	Type of study	Cohort	Sample size	Gene set
Treatment Outcomes
Huang et al., 2023	36658263	AD response	GWAS	Taiwanese Han - total (SSRI)	421	G alpha (i) signaling events (R-HSA-418594)
Huang et al., 2023	36658263	AD response	GWAS	Taiwanese Han - total (SSRI)	421	Class A/1 (Rhodopsin-like receptors) (R-HSA-373076)
Huang et al., 2023	36658263	AD response	GWAS	Taiwanese Han - total (SSRI)	421	Membrane attack complex (GO:0005579)
Huang et al., 2023	36658263	AD response	GWAS	Taiwanese Han - total (SSRI)	421	GPCR ligand binding (R-HSA-500792)
Huang et al., 2023	36658263	AD response	GWAS	Taiwanese Han - total (SSRI)	421	Terminal pathway of complement (R-HSA-166665)
Huang et al., 2023	36658263	AD response	GWAS	Taiwanese Han - total (SSRI)	421	GPCRs, Class A Rhodopsin-like (WP455)
Huang et al., 2023	36658263	AD response	GWAS	Taiwanese Han - total (SSRI)	421	Complement Activation (WP545)
Huang et al., 2023	36658263	AD response	GWAS	Taiwanese Han - total (SSRI)	421	Pore complex (GO:0046930)
Huang et al., 2023	36658263	AD response	GWAS	Taiwanese Han - total (SSRI)	421	Cytolysis (GO:0019835)
Huang et al., 2023	36658263	AD response	GWAS	Taiwanese Han - total (SSRI)	421	Complement activation, alternative pathway (GO:0006957)
Huang et al., 2023	36658263	AD response	GWAS	Taiwanese Han - total (SSRI)	421	Transmission of nerve impulse (GO:0019226)
Huang et al., 2023	36658263	AD response	GWAS	Taiwanese Han - total (SSRI)	421	Neuronal action potential (GO:0019228)
Huang et al., 2023	36658263	AD response	GWAS	Taiwanese Han - total (SSRI)	421	Complement activation, classical pathway (GO:0006958)
Huang et al., 2023	36658263	AD response	GWAS	Taiwanese Han - total (SSRI)	421	Humoral immune response mediated by circulating immunoglobulin (GO:0002455)
Huang et al., 2023	36658263	AD response	GWAS	Taiwanese Han - total (SSRI)	421	Plasma membrane protein complex (GO:0098797)
Huang et al., 2023	36658263	AD response	GWAS	Taiwanese Han - total (SSRI)	421	Immunoglobulin mediated immune response (GO:0016064)
Huang et al., 2023	36658263	AD response	GWAS	Taiwanese Han - total (SSRI)	421	B cell mediated immunity (GO:0019724)
Huang et al., 2023	36658263	AD response	GWAS	Taiwanese Han - total (SSRI)	421	Complement activation (GO:0006956)
Huang et al., 2023	36658263	AD response	GWAS	Taiwanese Han - total (SSRI)	421	Regulation of Complement cascade (R-HSA-977606)
Huang et al., 2023	36658263	AD response	GWAS	Taiwanese Han - total (SSRI)	421	Regulation of complement activation (GO:0030449)
Huang et al., 2023	36658263	AD response	GWAS	Taiwanese Han - total (SSRI)	421	Complement cascade (R-HSA-166658)
Huang et al., 2023	36658263	AD response	GWAS	Taiwanese Han - total (SSRI)	421	Adaptive immune response based on somatic recombination of immune receptors built from immunoglobulin superfamily domains (GO:0002460)
Huang et al., 2023	36658263	AD response	GWAS	Taiwanese Han - total (SSRI)	421	Regulation of humoral immune response (GO:0002920)
Huang et al., 2023	36658263	AD response	GWAS	Taiwanese Han - total (SSRI)	421	Lymphocyte mediated immunity (GO:0002449)
Huang et al., 2023	36658263	AD response	GWAS	Taiwanese Han - total (SSRI)	421	Ca2+ activated K+ channels (R-HSA-1296052)
Huang et al., 2023	36658263	AD response	GWAS	Taiwanese Han - total (SSRI)	421	Calcium-activated potassium channel activity (GO:0015269)
Huang et al., 2023	36658263	AD response	GWAS	Taiwanese Han - total (SSRI)	421	Allograft Rejection (WP2328)
Huang et al., 2023	36658263	AD response	GWAS	Taiwanese Han - total (SSRI)	421	Detection of calcium ion (GO:0005513)
Kang et al., 2020	32664413	AD remission	WES	MAKE BETTER - female	356	GO:0009127
Kang et al., 2020	32664413	AD remission	WES	MAKE BETTER - female	356	GO:0009156
Kang et al., 2020	32664413	AD remission	WES	MAKE BETTER - total	511	GO:0010359
Kang et al., 2020	32664413	AD remission	WES	MAKE BETTER - male	155	GO:0010359
Kang et al., 2020	32664413	AD remission	WES	MAKE BETTER - female	356	GO:0016073
Kang et al., 2020	32664413	AD remission	WES	MAKE BETTER - female	356	GO:0031110
Kang et al., 2020	32664413	AD remission	WES	MAKE BETTER - total	511	GO:0032700
Kang et al., 2020	32664413	AD remission	WES	MAKE BETTER - total	511	GO:0040031
Kang et al., 2020	32664413	AD remission	WES	MAKE BETTER - female	356	GO:0040031
Kang et al., 2020	32664413	AD remission	WES	MAKE BETTER - total	511	GO:0042424
Kang et al., 2020	32664413	AD remission	WES	MAKE BETTER - male	155	GO:0042424
Kang et al., 2020	32664413	AD remission	WES	MAKE BETTER - total	511	GO:0046007
Kang et al., 2020	32664413	AD remission	WES	MAKE BETTER - male	155	GO:0046007
Kang et al., 2020	32664413	AD remission	WES	MAKE BETTER - total	511	GO:0097062
Kang et al., 2020	32664413	AD remission	WES	MAKE BETTER - male	155	GO:0097062
Kang et al., 2020	32664413	AD remission	WES	MAKE BETTER - total	511	GO:0106027
Kang et al., 2020	32664413	AD remission	WES	MAKE BETTER - total	511	GO:1901879
Kang et al., 2020	32664413	AD remission	WES	MAKE BETTER - female	356	GO:1901879
Kang et al., 2020	32664413	AD remission	WES	MAKE BETTER - total	511	GO:1902430
Kang et al., 2020	32664413	AD remission	WES	MAKE BETTER - total	511	GO:1902950
Kang et al., 2020	32664413	AD remission	WES	MAKE BETTER - male	155	GO:1902950
Kang et al., 2020	32664413	AD remission	WES	MAKE BETTER - total	511	GO:1902991
Kang et al., 2020	32664413	AD remission	WES	MAKE BETTER - male	155	GO:1902991
Kang et al., 2020	32664413	AD remission	WES	MAKE BETTER - total	511	GO:1990535
Kang et al., 2020	32664413	AD remission	WES	MAKE BETTER - male	155	GO:1990535
Kang et al., 2020	32664413	AD remission	WES	MAKE BETTER - total	511	P00001
Kang et al., 2020	32664413	AD remission	WES	MAKE BETTER - male	155	P00001
Kang et al., 2020	32664413	AD remission	WES	MAKE BETTER - total	511	P02738
Kang et al., 2020	32664413	AD remission	WES	MAKE BETTER - female	356	P02738
Kang et al., 2020	32664413	AD remission	WES	MAKE BETTER - total	511	P05912
Kang et al., 2020	32664413	AD remission	WES	MAKE BETTER - male	155	P05912
Kang et al., 2020	32664413	AD remission	WES	MAKE BETTER - total	511	PWY-6342
Kang et al., 2020	32664413	AD remission	WES	MAKE BETTER - male	155	PWY-6342
Kang et al., 2020	32664413	AD remission	WES	MAKE BETTER - total	511	PWY-841
Kang et al., 2020	32664413	AD remission	WES	MAKE BETTER - female	356	PWY-841
Kang et al., 2020	32664413	AD remission	WES	MAKE BETTER - total	511	PWY6666-2
Kang et al., 2020	32664413	AD remission	WES	MAKE BETTER - male	155	PWY6666-2
Kang et al., 2020	32664413	AD remission	WES	MAKE BETTER - total	511	R-HSA-112311
Kang et al., 2020	32664413	AD remission	WES	MAKE BETTER - male	155	R-HSA-112311
Kang et al., 2020	32664413	AD remission	WES	MAKE BETTER - total	511	R-HSA-156581
Kang et al., 2020	32664413	AD remission	WES	MAKE BETTER - male	155	R-HSA-156581
Kang et al., 2020	32664413	AD remission	WES	MAKE BETTER - total	511	R-HSA-15869
Kang et al., 2020	32664413	AD remission	WES	MAKE BETTER - female	356	R-HSA-15869
Kang et al., 2020	32664413	AD remission	WES	MAKE BETTER - total	511	R-HSA-4085001
Kang et al., 2020	32664413	AD remission	WES	MAKE BETTER - total	511	R-HSA-419037
Kang et al., 2020	32664413	AD remission	WES	MAKE BETTER - male	155	R-HSA-419037
Kang et al., 2020	32664413	AD remission	WES	MAKE BETTER - total	511	R-HSA-446219
Kang et al., 2020	32664413	AD remission	WES	MAKE BETTER - total	511	R-HSA-6804758
Kang et al., 2020	32664413	AD remission	WES	MAKE BETTER - male	155	R-HSA-6804758
Kang et al., 2020	32664413	AD remission	WES	MAKE BETTER - total	511	R-HSA-73817
Kang et al., 2020	32664413	AD remission	WES	MAKE BETTER - female	356	R-HSA-73817
Kang et al., 2020	32664413	AD remission	WES	MAKE BETTER - total	511	R-HSA-73847
Kang et al., 2020	32664413	AD remission	WES	MAKE BETTER - female	356	R-HSA-73847
Li et al., 2020	33106475	NDRI response	GWAS	23andMe AES	3684	GO bp: go organ or tissue specific immune response
Li et al., 2020	33106475	NDRI response	GWAS	23andMe AES	3684	Curated gene sets: pid epha2 fwd pathway
Li et al., 2020	33106475	NDRI response	GWAS	23andMe AES	3684	GO bp: go membrane assembly
Li et al., 2020	33106475	NDRI response	GWAS	23andMe AES	3684	GO bp: go innate immune response in mucosa
Li et al., 2020	33106475	NDRI response	GWAS	23andMe AES	3684	Curated gene sets: darwiche squamous cell carcinoma up
Li et al., 2020	33106475	NDRI response	GWAS	23andMe AES	3684	Curated gene sets: nikolsky breast cancer 1q21 amplicon
Li et al., 2020	33106475	NDRI response	Meta-analysis of GWAS	23andMe AES, AESES	7483	GO bp: go morphogenesis of embryonic epithelium
Li et al., 2020	33106475	NDRI response	Meta-analysis of GWAS	23andMe AES, AESES	7483	Curated gene sets: sharma astrocytoma with nf1 syndrom
Li et al., 2020	33106475	NDRI response	Meta-analysis of GWAS	23andMe AES, AESES	7483	GO bp: go tube formation
Li et al., 2020	33106475	NDRI response	Meta-analysis of GWAS	23andMe AES, AESES	7483	GO mf: go sulfur compound transmembrane transporter activity
Li et al., 2020	33106475	NDRI response	Meta-analysis of GWAS	23andMe AES, AESES	7483	GO bp: go negative regulation of intracellular protein transport
Li et al., 2020	33106475	SNRI response	GWAS	23andMe AES	4005	GO mf: go sodium amino acid symporter activity
Li et al., 2020	33106475	SNRI response	GWAS	23andMe AES	4005	GO mf: go cation amino acid symporter activity
Li et al., 2020	33106475	SNRI response	GWAS	23andMe AES	4005	GO mf: go protein lipid complex binding (GOBP_PROTEIN_LIPID_COMPLEX_ORGANIZATION?)
Li et al., 2020	33106475	SNRI response	GWAS	23andMe AES	4005	DORN_ADENOVIRUS_INFECTION_24HR_UP
Li et al., 2020	33106475	SNRI response	GWAS	23andMe AES	4005	GOBP_AMINO_ACID_TRANSPORT
Li et al., 2020	33106475	SNRI response	GWAS	23andMe AESES	4114	Curated gene sets: parent mtor signaling up
Li et al., 2020	33106475	SNRI response	GWAS	23andMe AESES	4114	GO bp: go inflammatory response
Li et al., 2020	33106475	SNRI response	GWAS	23andMe AESES	4114	Curated gene sets: croonquist stromal stimulation dn
Li et al., 2020	33106475	SNRI response	GWAS	23andMe AESES	4114	Curated gene sets: foster tolerant macrophage dn
Li et al., 2020	33106475	SNRI response	GWAS	23andMe AESES	4114	GO bp: go microtubule polymerization or depolymerization
Li et al., 2020	33106475	SNRI response	GWAS	23andMe AESES	4114	GO bp: go binding of sperm to zona pellucida
Li et al., 2020	33106475	SNRI response	GWAS	23andMe AESES	4114	GO bp: go bone maturation
Li et al., 2020	33106475	SNRI response	Meta-analysis of GWAS	23andMe AES, AESES	7079	Curated gene sets: ding lung cancer mutated frequently
Li et al., 2020	33106475	SNRI response	Meta-analysis of GWAS	23andMe AES, AESES	7079	GO bp: go peptide hormone processing
Li et al., 2020	33106475	SNRI response	Meta-analysis of GWAS	23andMe AES, AESES	7079	Curated gene sets: pid toll endogenous pathway
Li et al., 2020	33106475	SNRI response	Meta-analysis of GWAS	23andMe AES, AESES	7079	GO mf: go transferase activity transferring nitrogenous groups
Li et al., 2020	33106475	SNRI response	Meta-analysis of GWAS	23andMe AES, AESES	7079	GO bp: go oxaloacetate metabolic process
Li et al., 2020	33106475	SNRI response	Meta-analysis of GWAS	23andMe AES, AESES	7079	Curated gene sets: pid erbb4 pathway
Li et al., 2020	33106475	SNRI response	Meta-analysis of GWAS	23andMe AES, AESES	7079	Curated gene sets: ding lung cancer mutated recurrently
Li et al., 2020	33106475	SNRI response	Meta-analysis of GWAS	23andMe AES, AESES	7079	Curated gene sets: reactome growth hormone receptor signaling
Li et al., 2020	33106475	SNRI response	Meta-analysis of GWAS	23andMe AES, AESES	7079	Curated gene sets: ding lung cancer mutated significantly
Li et al., 2020	33106475	SNRI response	Meta-analysis of GWAS	23andMe AES, AESES	7079	Curated gene sets: croonquist stromal stimulation dn
Li et al., 2020	33106475	SNRI response	Meta-analysis of GWAS	23andMe AES, AESES	7079	GO bp: go response to biotic stimulus
Li et al., 2020	33106475	SNRI response	Meta-analysis of GWAS	23andMe AES, AESES	7079	GO bp: go jak stat cascade involved in growth hormone signaling pathway
Li et al., 2020	33106475	SSRI response	GWAS	23andMe AES	12477	BHAT_ESR1_TARGETS_NOT_VIA_AKT1_DN
Li et al., 2020	33106475	SSRI response	GWAS	23andMe AES	12477	GOBP_EPIDERMAL_CELL_DIFFERENTIATION
Li et al., 2020	33106475	SSRI response	GWAS	23andMe AES	12477	GOBP_PYRIMIDINE_CONTAINING_COMPOUND_TRANSMEMBRANE_TRANSPORT
Li et al., 2020	33106475	SSRI response	GWAS	23andMe AES	12477	MARTORIATI_MDM4_TARGETS_FETAL_LIVER_DN
Li et al., 2020	33106475	SSRI response	GWAS	23andMe AES	12477	GOBP_POSITIVE_REGULATION_OF_EPITHELIAL_CELL_DIFFERENTIATION
Li et al., 2020	33106475	SSRI response	GWAS	23andMe AES	12477	GOBP_POSITIVE_REGULATION_OF_EPIDERMIS_DEVELOPMENT
Li et al., 2020	33106475	SSRI response	Meta-analysis of GWAS	23andMe AES, AESES	19740	GO cc: go photoreceptor connecting cilium
Li et al., 2020	33106475	SSRI response	Meta-analysis of GWAS	23andMe AES, AESES	19740	Curated gene sets: kegg glioma
Li et al., 2020	33106475	SSRI response	Meta-analysis of GWAS	23andMe AES, AESES	19740	Curated gene sets: vanharanta uterine fibroid with 7q deletion dn
Li et al., 2020	33106475	SSRI response	Meta-analysis of GWAS	23andMe AES, AESES	19740	GO bp: go exocytosis
Li et al., 2020	33106475	SSRI response	Meta-analysis of GWAS	23andMe AES, AESES	19740	Curated gene sets: reactome signaling by ils
Li et al., 2020	33106475	SSRI response	Meta-analysis of GWAS	23andMe AES, AESES	19740	GO mf: go fibroblast growth factor receptor binding
Li et al., 2020	33106475	SSRI response	Meta-analysis of GWAS	23andMe AES, AESES	19740	Curated gene sets: hoshida liver cancer survival up
Li et al., 2020	33106475	SSRI response	Meta-analysis of GWAS	23andMe AES, AESES	19740	Curated gene sets: biocarta gaba pathway
Li et al., 2020	33106475	SSRI response	Meta-analysis of GWAS	23andMe AES, AESES	19740	GO bp: go gamma aminobutyric acid signaling pathway
Li et al., 2020	33106475	SSRI response	Meta-analysis of GWAS	23andMe AES, AESES	19740	Curated gene sets: reactome gaba a receptor activation
Li et al., 2020	33106475	SSRI response	Meta-analysis of GWAS	23andMe AES, AESES	19740	Curated gene sets: sa caspase cascade
Li et al., 2020	33106475	SSRI response	Meta-analysis of GWAS	23andMe AES, AESES	19740	GO bp: go regulated exocytosis
Li et al., 2020	33106475	SSRI response	Meta-analysis of GWAS	23andMe AES, AESES	19740	Curated gene sets: kegg endometrial cancer
Li et al., 2020	33106475	SSRI response	Meta-analysis of GWAS	23andMe AES, AESES	19740	Curated gene sets: kegg long term depression
Li et al., 2020	33106475	SSRI response	Meta-analysis of GWAS	23andMe AES, AESES	19740	Curated gene sets: reactome response to elevated platelet cytosolic ca2
Li et al., 2020	33106475	SSRI response	Meta-analysis of GWAS	23andMe AES, AESES	19740	Curated gene sets: kegg melanoma
Li et al., 2020	33106475	TRD	GWAS	23andMe AES	20382	Curated gene sets: reactome activation of chaperone genes by atf6 alpha
Li et al., 2020	33106475	TRD	GWAS	23andMe AES	20382	Curated gene sets: rashi response to ionizing radiation 3
Li et al., 2020	33106475	TRD	GWAS	23andMe AES	20382	Curated gene sets: zhan multiple myeloma cd1 dn
Li et al., 2020	33106475	TRD	GWAS	23andMe AES	20382	Curated gene sets: rickman metastasis up
Li et al., 2020	33106475	TRD	GWAS	23andMe AES	20382	Curated gene sets: fardin hypoxia 9
Li et al., 2020	33106475	TRD	GWAS	23andMe AES	20382	GO bp: go sequestering of metal ion
Li et al., 2020	33106475	TRD	GWAS	23andMe AES	20382	GO cc: go chromocenter
Li et al., 2020	33106475	TRD	Meta-analysis of GWAS	23andMe AES, AESES	25506	Curated gene sets: provenzani metastasis dn
Li et al., 2020	33106475	TRD	Meta-analysis of GWAS	23andMe AES, AESES	25506	Curated gene sets: gavin il2 responsive foxp3 targets up
Li et al., 2020	33106475	TRD	Meta-analysis of GWAS	23andMe AES, AESES	25506	Curated gene sets: sa g2 and m phases
Li et al., 2020	33106475	TRD	Meta-analysis of GWAS	23andMe AES, AESES	25506	Curated gene sets: nikolsky breast cancer 14q22 amplicon
Fabbri et al., 2019	30468137	TRD vs response	GWAS	GSRD	759	GO:0043949
Fabbri et al., 2019	30468137	TRD vs response	Meta-analysis of GWAS	GSRD, STAR*D, GENDEP	2214	JAZAG TGFB1 SIGNALING UP
Fabbri et al., 2019	30468137	TRD vs response	Meta-analysis of GWAS	GSRD, STAR*D, GENDEP	2214	GO:0045814
Fabbri et al., 2019	30468137	TRD vs response or non responsers to a first AD	Meta-analysis of GWAS	GSRD, STAR*D, GENDEP	3225	GO:0000183
Fabbri et al., 2019	30468137	TRD vs response or non responsers to a first AD	Meta-analysis of GWAS	GSRD, STAR*D, GENDEP	3225	VANDESLUIS NORMAL EMBRYOS UP
Fabbri et al., 2019	30468137	TRD vs response or non responsers to a first AD	Meta-analysis of GWAS	GSRD, STAR*D, GENDEP	3225	GSE13306 RA VS UNTREATED MEM CD4 TCELL DN
Fabbri et al., 2018	29160301	AD remission	Meta-analysis of GWAS	escGENDEP, STAR*D	1422	Steroid hormone receptor signaling pathway (GO: 0030518)
Fabbri et al., 2018	29160301	AD remission	Meta-analysis of GWAS	escGENDEP, STAR*D	1422	Intracellular receptor-mediated signaling pathway (GO: 0030522)
Fabbri et al., 2018	29160301	AD response	Meta-analysis of GWAS	GENDEP, STAR*D	1739	Chromosome pathway (GO: 0005694)
Fabbri et al., 2018	29160301	AD response	Meta-analysis of GWAS	GENDEP, STAR*D	1739	Chromosomal part (GO: 0044427)
Fabbri et al., 2018	29160301	AD response	Meta-analysis of GWAS	GENDEP, STAR*D	1739	Targets of JUN
Fabbri et al., 2018	29160301	AD response	Meta-analysis of GWAS	GENDEP, STAR*D	1739	Targets of CREB1
Fabbri et al., 2018	29160301	AD response	Meta-analysis of GWAS	escGENDEP, STAR*D	1422	Steroid hormone receptor signaling pathway (GO: 0030518)
Fabbri et al., 2018	29160301	AD response	Meta-analysis of GWAS	escGENDEP, STAR*D	1422	Intracellular receptor-mediated signaling pathway (GO: 0030522)
Li et al., 2016	27622933	AD response	GWAS	23andMe AESES - citalopram or escitalopram	4968	chr16p12
Li et al., 2016	27622933	AD response	GWAS	23andMe AESES - citalopram or escitalopram	4968	00460 Cyanoamino_acid_metabolism
Li et al., 2016	27622933	AD response	GWAS	23andMe AESES - citalopram or escitalopram	4968	REACTOME_NUCLEOTIDE_LIKE_PURINERGIC_RECEPTORS
Li et al., 2016	27622933	AD response	GWAS	23andMe AESES - citalopram or escitalopram	4968	KEGG_GLYCOSAMINOGLYCAN_BIOSYNTHESIS_HEPARAN_SULFATE
Li et al., 2016	27622933	AD response	GWAS	23andMe AESES - citalopram or escitalopram	4968	chr22q11
Li et al., 2016	27622933	AD response	GWAS	23andMe AESES - citalopram or escitalopram	4968	KEGG_TAURINE_AND_HYPOTAURINE_METABOLISM
Li et al., 2016	27622933	AD response	GWAS	23andMe AESES - SSRI	9688	HALLMARK_E2F_TARGETS
Li et al., 2016	27622933	AD response	GWAS	23andMe AESES - SSRI	9688	chr8p22
Li et al., 2016	27622933	AD response	GWAS	23andMe AESES - NDRI	4536	KEGG_LONG_TERM_DEPRESSION
Li et al., 2016	27622933	AD response	GWAS	23andMe AESES - NDRI	4536	SH3_SH2_ADAPTOR_ACTIVITY
Li et al., 2016	27622933	AD response	GWAS	23andMe AESES - NDRI	4536	PROTEIN_BINDING_BRIDGING
Li et al., 2016	27622933	AD response	GWAS	23andMe AESES - NDRI	4536	MOLECULAR_ADAPTOR_ACTIVITY
Li et al., 2016	27622933	AD response	GWAS	23andMe AESES - NDRI	4536	PID_CDC42_REG_PATHWAY
Li et al., 2016	27622933	AD response	GWAS	23andMe AESES - NDRI	4536	BIOCARTA_VEGF_PATHWAY
Li et al., 2016	27622933	AD response	GWAS	23andMe AESES - NDRI	4536	LIPID_HOMEOSTASIS
Li et al., 2016	27622933	AD response	GWAS	23andMe AESES - NDRI	4536	HALLMARK_ADIPOGENESIS
Li et al., 2016	27622933	AD response	GWAS	23andMe AESES - NDRI	4536	GGCCAGT,MIR-193A,MIR-193B
Li et al., 2016	27622933	TRD	GWAS	23andMe AESES	9106	KEGG_FATTY_ACID_METABOLISM
Hunter et al., 2013	23726668	AD response	GWAS	STAR*D citalopram - sustained vs unsustaind response	1116	KEGG_ALZHEIMERS_DISEASE
Hunter et al., 2013	23726668	AD response	GWAS	STAR*D citalopram - sustained vs unsustaind response	1116	KEGG_TYPE_I_DIABETES_MELLITUS
Hunter et al., 2013	23726668	AD response	GWAS	STAR*D citalopram - sustained vs unsustaind response	1116	ST_TUMOR_NECROSIS_FACTOR_PATHWAY
Hunter et al., 2013	23726668	AD response	GWAS	STAR*D citalopram - sustained vs unsustaind response	1116	KEGG_ANTIGEN_PROCESSING_AND_PRESENTATION
Hunter et al., 2013	23726668	AD response	GWAS	STAR*D citalopram - sustained vs unsustaind response	1116	KEGG_LONG_TERM_POTENTIATION
Hunter et al., 2013	23726668	AD response	GWAS	STAR*D citalopram - sustained vs unsustaind response	1116	BIOCARTA_MPR_PATHWAY
Hunter et al., 2013	23726668	AD response	GWAS	STAR*D citalopram - sustained vs unsustaind response	1116	WNT_SIGNALING
Hunter et al., 2013	23726668	AD response	GWAS	STAR*D citalopram - sustained vs unsustaind response	1116	ST_GAQ_PATHWAY
Clinical Dimensions
Goodman et al., 2024	38352337	Sleep (SHS-ADD)	GWAS	UKB	413904	REACTOME_SIGNALLING_BY_NGF
Goodman et al., 2024	38352337	Sleep (SHS-ADD)	GWAS	UKB	413904	KEGG_MAPK_SIGNALING_PATHWAY
Goodman et al., 2024	38352337	Sleep (SHS-ADD)	GWAS	UKB	413904	KEGG_LONG_TERM_DEPRESSION
Goodman et al., 2024	38352337	Sleep (SHS-ADD)	GWAS	UKB	413904	REACTOME_DOWNSTREAM_SIGNALING_OF_ACTIVATED_FGFR
Goodman et al., 2024	38352337	Sleep (SHS-ADD)	GWAS	UKB	413904	REACTOME_DEVELOPMENTAL_BIOLOGY
Goodman et al., 2024	38352337	Sleep (SHS-ADD)	GWAS	UKB	413904	REACTOME_SIGNALING_BY_FGFR
Goodman et al., 2024	38352337	Sleep (SHS-ADD)	GWAS	UKB	413904	REACTOME_NGF_SIGNALLING_VIA_TRKA_FROM_THE_PLASMA_MEMBRANE
Goodman et al., 2024	38352337	Sleep (SHS-ADD)	GWAS	UKB	413904	REACTOME_IMMUNE_SYSTEM
Goodman et al., 2024	38352337	Sleep (SHS-ADD)	GWAS	UKB	413904	KEGG_NON_SMALL_CELL_LUNG_CANCER
Goodman et al., 2024	38352337	Sleep (SHS-ADD)	GWAS	UKB	413904	KEGG_MELANOGENESIS
Goodman et al., 2024	38352337	Sleep (SHS-ADD)	GWAS	UKB	413904	REACTOME_SIGNALING_BY_FGFR_IN_DISEASE
Goodman et al., 2024	38352337	Sleep (SHS-ADD)	GWAS	UKB	413904	REACTOME_NEURONAL_SYSTEM
Goodman et al., 2024	38352337	Sleep (SHS-ADD)	GWAS	UKB	413904	REACTOME_G_PROTEIN_ACTIVATION
Goodman et al., 2024	38352337	Sleep (SHS-ADD)	GWAS	UKB	413904	KEGG_PATHWAYS_IN_CANCER
Goodman et al., 2024	38352337	Sleep (SHS-ADD)	GWAS	UKB	413904	REACTOME_BIOSYNTHESIS_OF_THE_N_GLYCAN_PRECURSOR_DOLICHOL_LIPID_LINKED_OLIGOSACCHARIDE_LLO_AND_TRANSFER_TO_A_NASCENT_PROTEIN
Goodman et al., 2024	38352337	Sleep (SHS-ADD)	GWAS	UKB	413904	REACTOME_SIGNALING_BY_ERBB4
Goodman et al., 2024	38352337	Sleep (SHS-ADD)	GWAS	UKB	413904	REACTOME_REGULATION_OF_INSULIN_SECRETION
Goodman et al., 2024	38352337	Sleep (SHS-ADD)	GWAS	UKB	413904	KEGG_VEGF_SIGNALING_PATHWAY
Goodman et al., 2024	38352337	Sleep (SHS-ADD)	GWAS	UKB	413904	REACTOME_ADAPTIVE_IMMUNE_SYSTEM
Goodman et al., 2024	38352337	Sleep (SHS-ADD)	GWAS	UKB	413904	REACTOME_TRANSMISSION_ACROSS_CHEMICAL_SYNAPSES
Goodman et al., 2024	38352337	Sleep (SHS-ADD)	GWAS	UKB	413904	KEGG_NEUROTROPHIN_SIGNALING_PATHWAY
Goodman et al., 2024	38352337	Sleep (SHS-ADD)	GWAS	UKB	413904	REACTOME_INHIBITION_OF_INSULIN_SECRETION_BY_ADRENALINE_NORADRENALINE
Goodman et al., 2024	38352337	Sleep (SHS-ADD)	GWAS	UKB	413904	KEGG_CIRCADIAN_RHYTHM_MAMMAL
Goodman et al., 2024	38352337	Sleep (SHS-ADD)	GWAS	UKB	413904	KEGG_UBIQUITIN_MEDIATED_PROTEOLYSIS
Goodman et al., 2024	38352337	Sleep (SHS-ADD)	GWAS	UKB	413904	KEGG_LEUKOCYTE_TRANSENDOTHELIAL_MIGRATION
Goodman et al., 2024	38352337	Sleep (SHS-ADD)	GWAS	UKB	413904	REACTOME_FRS2_MEDIATED_CASCADE
Goodman et al., 2024	38352337	Sleep (SHS-ADD)	GWAS	UKB	413904	REACTOME_DOWNSTREAM_SIGNAL_TRANSDUCTION
Goodman et al., 2024	38352337	Sleep (SHS-ADD)	GWAS	UKB	413904	KEGG_ACUTE_MYELOID_LEUKEMIA
Goodman et al., 2024	38352337	Sleep (SHS-ADD)	GWAS	UKB	413904	REACTOME_ROLE_OF_SECOND_MESSENGERS_IN_NETRIN1_SIGNALING
Goodman et al., 2024	38352337	Sleep (SHS-ADD)	GWAS	UKB	413904	REACTOME_GABA_RECEPTOR_ACTIVATION
Goodman et al., 2024	38352337	Sleep (SHS-ADD)	GWAS	UKB	413904	KEGG_TGF_BETA_SIGNALING_PATHWAY
Goodman et al., 2024	38352337	Sleep (SHS-ADD)	GWAS	UKB	413904	REACTOME_FACTORS_INVOLVED_IN_MEGAKARYOCYTE_DEVELOPMENT_AND_PLATELET_PRODUCTION
Goodman et al., 2024	38352337	Sleep (SHS-ADD)	GWAS	UKB	413904	BIOCARTA_VIP_PATHWAY
Goodman et al., 2024	38352337	Sleep (SHS-ADD)	GWAS	UKB	413904	REACTOME_EFFECTS_OF_PIP2_HYDROLYSIS
Goodman et al., 2024	38352337	Sleep (SHS-ADD)	GWAS	UKB	413904	REACTOME_ADENYLATE_CYCLASE_INHIBITORY_PATHWAY
Goodman et al., 2024	38352337	Sleep (SHS-ADD)	GWAS	UKB	413904	REACTOME_MYOGENESIS
Goodman et al., 2024	38352337	Sleep (SHS-ADD)	GWAS	UKB	413904	REACTOME_SIGNALING_BY_EGFR_IN_CANCER
Goodman et al., 2024	38352337	Sleep (SHS-ADD)	GWAS	UKB	413904	REACTOME_ADP_SIGNALLING_THROUGH_P2RY12
Goodman et al., 2024	38352337	Sleep (SHS-ADD)	GWAS	UKB	413904	REACTOME_GABA_B_RECEPTOR_ACTIVATION
Goodman et al., 2024	38352337	Sleep (SHS-ADD)	GWAS	UKB	413904	REACTOME_INNATE_IMMUNE_SYSTEM
Goodman et al., 2024	38352337	Sleep (SHS-ADD)	GWAS	UKB	413904	REACTOME_PLC_BETA_MEDIATED_EVENTS
Goodman et al., 2024	38352337	Sleep (SHS-ADD)	GWAS	UKB	413904	KEGG_ADHERENS_JUNCTION
Goodman et al., 2024	38352337	Sleep (SHS-ADD)	GWAS	UKB	413904	BIOCARTA_CARM1_PATHWAY
Goodman et al., 2024	38352337	Sleep (SHS-ADD)	GWAS	UKB	413904	KEGG_GNRH_SIGNALING_PATHWAY
Goodman et al., 2024	38352337	Sleep (SHS-ADD)	GWAS	UKB	413904	REACTOME_SIGNALING_BY_ERBB2
Goodman et al., 2024	38352337	Sleep (SHS-ADD)	GWAS	UKB	413904	REACTOME_MAP_KINASE_ACTIVATION_IN_TLR_CASCADE
Goodman et al., 2024	38352337	Sleep (SHS-ADD)	GWAS	UKB	413904	REACTOME_SIGNALING_BY_THE_B_CELL_RECEPTOR_BCR
Goodman et al., 2024	38352337	Sleep (SHS-ADD)	GWAS	UKB	413904	BIOCARTA_AGR_PATHWAY
Goodman et al., 2024	38352337	Sleep (SHS-ADD)	GWAS	UKB	413904	REACTOME_INTEGRATION_OF_ENERGY_METABOLISM
Goodman et al., 2024	38352337	Sleep (SHS-ADD)	GWAS	UKB	413904	KEGG_HUNTINGTONS_DISEASE
Goodman et al., 2024	38352337	Sleep (SHS-ADD)	GWAS	UKB	413904	REACTOME_NETRIN1_SIGNALING
Goodman et al., 2024	38352337	Sleep (SHS-ADD)	GWAS	UKB	413904	REACTOME_P75_NTR_RECEPTOR_MEDIATED_SIGNALLING
Goodman et al., 2024	38352337	Sleep (SHS-ADD)	GWAS	UKB	413904	BIOCARTA_CDC42RAC_PATHWAY
Goodman et al., 2024	38352337	Sleep (SHS-ADD)	GWAS	UKB	413904	REACTOME_SIGNAL_AMPLIFICATION
Goodman et al., 2024	38352337	Sleep (SHS-ADD)	GWAS	UKB	413904	REACTOME_SIGNALING_BY_SCF_KIT
Goodman et al., 2024	38352337	Sleep (SHS-ADD)	GWAS	UKB	413904	REACTOME_MRNA_SPLICING
Goodman et al., 2024	38352337	Sleep (SHS-ADD)	GWAS	UKB	413904	KEGG_AMYOTROPHIC_LATERAL_SCLEROSIS_ALS
Goodman et al., 2024	38352337	Sleep (SHS-ADD)	GWAS	UKB	413904	KEGG_CALCIUM_SIGNALING_PATHWAY
Goodman et al., 2024	38352337	Sleep (SHS-ADD)	GWAS	UKB	413904	REACTOME_ETHANOL_OXIDATION
Goodman et al., 2024	38352337	Sleep (SHS-ADD)	GWAS	UKB	413904	KEGG_VIRAL_MYOCARDITIS
Goodman et al., 2024	38352337	Sleep (SHS-ADD)	GWAS	UKB	413904	REACTOME_IL1_SIGNALING
Goodman et al., 2024	38352337	Sleep (SHS-ADD)	GWAS	UKB	413904	REACTOME_FORMATION_OF_ATP_BY_CHEMIOSMOTIC_COUPLING
Goodman et al., 2024	38352337	Sleep (SHS-ADD)	GWAS	UKB	413904	KEGG_FC_EPSILON_RI_SIGNALING_PATHWAY
Goodman et al., 2024	38352337	Sleep (SHS-ADD)	GWAS	UKB	413904	REACTOME_SIGNALING_BY_PDGF
Goodman et al., 2024	38352337	Sleep (SHS-ADD)	GWAS	UKB	413904	REACTOME_PROCESSING_OF_CAPPED_INTRON_CONTAINING_PRE_MRNA
Goodman et al., 2024	38352337	Sleep (SHS-ADD)	GWAS	UKB	413904	REACTOME_G_ALPHA_Z_SIGNALLING_EVENTS
Goodman et al., 2024	38352337	Sleep (SHS-ADD)	GWAS	UKB	413904	BIOCARTA_UCALPAIN_PATHWAY
Goodman et al., 2024	38352337	Sleep (SHS-ADD)	GWAS	UKB	413904	REACTOME_PI3K_AKT_ACTIVATION
Goodman et al., 2024	38352337	Sleep (SHS-ADD)	GWAS	UKB	413904	REACTOME_PROLONGED_ERK_ACTIVATION_EVENTS
Goodman et al., 2024	38352337	Sleep (SHS-ADD)	GWAS	UKB	413904	REACTOME_CIRCADIAN_CLOCK
Goodman et al., 2024	38352337	Sleep (SHS-ADD)	GWAS	UKB	413904	REACTOME_INSULIN_RECEPTOR_SIGNALLING_CASCADE
Goodman et al., 2024	38352337	Sleep (SHS-ADD)	GWAS	UKB	413904	BIOCARTA_MAL_PATHWAY
Goodman et al., 2024	38352337	Sleep (SHS-ADD)	GWAS	UKB	413904	REACTOME_MRNA_PROCESSING
Goodman et al., 2024	38352337	Sleep (SHS-ADD)	GWAS	UKB	413904	KEGG_SNARE_INTERACTIONS_IN_VESICULAR_TRANSPORT
Goodman et al., 2024	38352337	Sleep (SHS-ADD)	GWAS	UKB	413904	KEGG_GAP_JUNCTION
Goodman et al., 2024	38352337	Sleep (SHS-ADD)	GWAS	UKB	413904	REACTOME_CS_DS_DEGRADATION
Goodman et al., 2024	38352337	Sleep (SHS-ADD)	GWAS	UKB	413904	BIOCARTA_PML_PATHWAY
Goodman et al., 2024	38352337	Sleep (SHS-ADD)	GWAS	UKB	413904	REACTOME_HEMOSTASIS
Goodman et al., 2024	38352337	Sleep (SHS-ADD)	GWAS	UKB	413904	KEGG_TYROSINE_METABOLISM
Goodman et al., 2024	38352337	Sleep (SHS-ADD)	GWAS	UKB	413904	REACTOME_SYNTHESIS_OF_PIPS_AT_THE_EARLY_ENDOSOME_MEMBRANE
Goodman et al., 2024	38352337	Sleep (SHS-ADD)	GWAS	UKB	413904	KEGG_PROXIMAL_TUBULE_BICARBONATE_RECLAMATION
Goodman et al., 2024	38352337	Sleep (SHS-ADD)	GWAS	UKB	413904	REACTOME_CHONDROITIN_SULFATE_DERMATAN_SULFATE_METABOLISM
Goodman et al., 2024	38352337	Sleep (SHS-ADD)	GWAS	UKB	413904	REACTOME_G_ALPHA_S_SIGNALLING_EVENTS
Goodman et al., 2024	38352337	Sleep (SHS-ADD)	GWAS	UKB	413904	REACTOME_NOD1_2_SIGNALING_PATHWAY
Goodman et al., 2024	38352337	Sleep (SHS-ADD)	GWAS	UKB	413904	BIOCARTA_TFF_PATHWAY
Goodman et al., 2024	38352337	Sleep (SHS-ADD)	GWAS	UKB	413904	REACTOME_NUCLEAR_SIGNALING_BY_ERBB4
Goodman et al., 2024	38352337	Sleep (SHS-ADD)	GWAS	UKB	413904	REACTOME_SIGNALING_BY_BMP
Goodman et al., 2024	38352337	Sleep (SHS-ADD)	GWAS	UKB	413904	BIOCARTA_CARDIACEGF_PATHWAY
Goodman et al., 2024	38352337	Sleep (SHS-ADD)	GWAS	UKB	413904	BIOCARTA_MAPK_PATHWAY
Goodman et al., 2024	38352337	Sleep (SHS-ADD)	GWAS	UKB	413904	REACTOME_NFKB_AND_MAP_KINASES_ACTIVATION_MEDIATED_BY_TLR4_SIGNALING_REPERTOIRE
Goodman et al., 2024	38352337	Sleep (SHS-ADD)	GWAS	UKB	413904	REACTOME_TOLL_RECEPTOR_CASCADES
Goodman et al., 2024	38352337	Sleep (SHS-ADD)	GWAS	UKB	413904	REACTOME_GASTRIN_CREB_SIGNALLING_PATHWAY_VIA_PKC_AND_MAPK
Goodman et al., 2024	38352337	Sleep (SHS-ADD)	GWAS	UKB	413904	REACTOME_SOS_MEDIATED_SIGNALLING
Goodman et al., 2024	38352337	Sleep (SHS-ADD)	GWAS	UKB	413904	REACTOME_OPIOID_SIGNALLING
Goodman et al., 2024	38352337	Sleep (SHS-ADD)	GWAS	UKB	413904	BIOCARTA_PYK2_PATHWAY
Goodman et al., 2024	38352337	Sleep (SHS-ADD)	GWAS	UKB	413904	KEGG_GLIOMA
Goodman et al., 2024	38352337	Sleep (SHS-ADD)	GWAS	UKB	413904	REACTOME_CYTOKINE_SIGNALING_IN_IMMUNE_SYSTEM
Goodman et al., 2024	38352337	Sleep (SHS-ADD)	GWAS	UKB	413904	BIOCARTA_FMLP_PATHWAY
Goodman et al., 2024	38352337	Sleep (SHS-ADD)	GWAS	UKB	413904	REACTOME_ACTIVATED_TAK1_MEDIATES_P38_MAPK_ACTIVATION
Goodman et al., 2024	38352337	Sleep (SHS-ADD)	GWAS	UKB	413904	KEGG_PARKINSONS_DISEASE
Goodman et al., 2024	38352337	Sleep (SHS-ADD)	GWAS	UKB	413904	REACTOME_SYNTHESIS_OF_SUBSTRATES_IN_N_GLYCAN_BIOSYTHESIS
Goodman et al., 2024	38352337	Sleep (SHS-ADD)	GWAS	UKB	413904	REACTOME_SHC1_EVENTS_IN_ERBB4_SIGNALING
Goodman et al., 2024	38352337	Sleep (SHS-ADD)	GWAS	UKB	413904	KEGG_PATHOGENIC_ESCHERICHIA_COLI_INFECTION
Goodman et al., 2024	38352337	Sleep (SHS-ADD)	GWAS	UKB	413904	BIOCARTA_ALK_PATHWAY
Goodman et al., 2024	38352337	Sleep (SHS-ADD)	GWAS	UKB	413904	REACTOME_SIGNALLING_TO_P38_VIA_RIT_AND_RIN
Goodman et al., 2024	38352337	Sleep (SHS-ADD)	GWAS	UKB	413904	REACTOME_CYTOSOLIC_TRNA_AMINOACYLATION
Goodman et al., 2024	38352337	Sleep (SHS-ADD)	GWAS	UKB	413904	BIOCARTA_P38MAPK_PATHWAY
Goodman et al., 2024	38352337	Sleep (SHS-ADD)	GWAS	UKB	413904	REACTOME_G_ALPHA1213_SIGNALLING_EVENTS
Goodman et al., 2024	38352337	Sleep (SHS-ADD)	GWAS	UKB	413904	REACTOME_GRB2_EVENTS_IN_ERBB2_SIGNALING
Goodman et al., 2024	38352337	Sleep (SHS-ADD)	GWAS	UKB	413904	REACTOME_PROLACTIN_RECEPTOR_SIGNALING
Goodman et al., 2024	38352337	Sleep (SHS-ADD)	GWAS	UKB	413904	KEGG_REGULATION_OF_ACTIN_CYTOSKELETON
Goodman et al., 2024	38352337	Sleep (SHS-ADD)	GWAS	UKB	413904	REACTOME_RAF_MAP_KINASE_CASCADE
Goodman et al., 2024	38352337	Sleep (SHS-ADD)	GWAS	UKB	413904	KEGG_THYROID_CANCER
Goodman et al., 2024	38352337	Sleep (SHS-ADD)	GWAS	UKB	413904	BIOCARTA_HCMV_PATHWAY
Goodman et al., 2024	38352337	Sleep (SHS-ADD)	GWAS	UKB	413904	REACTOME_NEUROTRANSMITTER_RECEPTOR_BINDING_AND_DOWNSTREAM_TRANSMISSION_IN_THE_POSTSYNAPTIC_CELL
Goodman et al., 2024	38352337	Sleep (SHS-ADD)	GWAS	UKB	413904	BIOCARTA_AT1R_PATHWAY
Goodman et al., 2024	38352337	Sleep (SHS-ADD)	GWAS	UKB	413904	REACTOME_TRAF6_MEDIATED_INDUCTION_OF_NFKB_AND_MAP_KINASES_UPON_TLR7_8_OR_9_ACTIVATION
Goodman et al., 2024	38352337	Sleep (SHS-ADD)	GWAS	UKB	413904	BIOCARTA_CELLCYCLE_PATHWAY
Goodman et al., 2024	38352337	Sleep (SHS-ADD)	GWAS	UKB	413904	REACTOME_SYNTHESIS_SECRETION_AND_INACTIVATION_OF_GIP
Goodman et al., 2024	38352337	Sleep (SHS-ADD)	GWAS	UKB	413904	REACTOME_MYD88_MAL_CASCADE_INITIATED_ON_PLASMA_MEMBRANE
Goodman et al., 2024	38352337	Sleep (SHS-ADD)	GWAS	UKB	413904	REACTOME_BMAL1_CLOCK_NPAS2_ACTIVATES_CIRCADIAN_EXPRESSION
Goodman et al., 2024	38352337	Sleep (SHS-ADD)	GWAS	UKB	413904	BIOCARTA_P27_PATHWAY
Goodman et al., 2024	38352337	Sleep (SHS-ADD)	GWAS	UKB	413904	REACTOME_ASPARAGINE_N_LINKED_GLYCOSYLATION
Goodman et al., 2024	38352337	Sleep (SHS-ADD)	GWAS	UKB	413904	REACTOME_SHC1_EVENTS_IN_EGFR_SIGNALING
Goodman et al., 2024	38352337	Sleep (SHS-ADD)	GWAS	UKB	413904	REACTOME_SIGNALING_BY_RHO_GTPASES
Goodman et al., 2024	38352337	Sleep (SHS-ADD)	GWAS	UKB	413904	KEGG_N_GLYCAN_BIOSYNTHESIS
Goodman et al., 2024	38352337	Sleep (SHS-ADD)	GWAS	UKB	413904	REACTOME_DOWNSTREAM_SIGNALING_EVENTS_OF_B_CELL_RECEPTOR_BCR
Goodman et al., 2024	38352337	Sleep (SHS-ADD)	GWAS	UKB	413904	BIOCARTA_RAS_PATHWAY
Goodman et al., 2024	38352337	Sleep (SHS-ADD)	GWAS	UKB	413904	KEGG_AXON_GUIDANCE
Goodman et al., 2024	38352337	Sleep (SHS-ADD)	GWAS	UKB	413904	REACTOME_INTRINSIC_PATHWAY_FOR_APOPTOSIS
Goodman et al., 2024	38352337	Sleep (SHS-ADD)	GWAS	UKB	413904	REACTOME_PI3K_EVENTS_IN_ERBB2_SIGNALING
Goodman et al., 2024	38352337	Sleep (SHS-ADD)	GWAS	UKB	413904	BIOCARTA_RACCYCD_PATHWAY
Goodman et al., 2024	38352337	Sleep (SHS-ADD)	GWAS	UKB	413904	REACTOME_ENOS_ACTIVATION_AND_REGULATION
Goodman et al., 2024	38352337	Sleep (SHS-ADD)	GWAS	UKB	413904	KEGG_PROSTATE_CANCER
Goodman et al., 2024	38352337	Sleep (SHS-ADD)	GWAS	UKB	413904	KEGG_MELANOMA
Goodman et al., 2024	38352337	Sleep (SHS-ADD)	GWAS	UKB	413904	REACTOME_ANTIGEN_PROCESSING_UBIQUITINATION_PROTEASOME_DEGRADATION
Goodman et al., 2024	38352337	Sleep (SHS-ADD)	GWAS	UKB	413904	KEGG_PHOSPHATIDYLINOSITOL_SIGNALING_SYSTEM
Goodman et al., 2024	38352337	Sleep (SHS-ADD)	GWAS	UKB	413904	REACTOME_PLATELET_HOMEOSTASIS
Goodman et al., 2024	38352337	Sleep (SHS-ADD)	GWAS	UKB	413904	KEGG_BLADDER_CANCER
Goodman et al., 2024	38352337	Sleep (SHS-ADD)	GWAS	UKB	413904	KEGG_TIGHT_JUNCTION
Goodman et al., 2024	38352337	Sleep (SHS-ADD)	GWAS	UKB	413904	KEGG_PHENYLALANINE_METABOLISM
Goodman et al., 2024	38352337	Sleep (SHS-ADD)	GWAS	UKB	413904	REACTOME_SIGNAL_TRANSDUCTION_BY_L1
Goodman et al., 2024	38352337	Sleep (SHS-ADD)	GWAS	UKB	413904	BIOCARTA_ERK5_PATHWAY
Goodman et al., 2024	38352337	Sleep (SHS-ADD)	GWAS	UKB	413904	REACTOME_NUCLEOTIDE_BINDING_DOMAIN_LEUCINE_RICH_REPEAT_CONTAINING_RECEPTOR_NLR_SIGNALING_PATHWAYS
Goodman et al., 2024	38352337	Sleep (SHS-ADD)	GWAS	UKB	413904	REACTOME_CLASS_I_MHC_MEDIATED_ANTIGEN_PROCESSING_PRESENTATION
Goodman et al., 2024	38352337	Sleep (SHS-ADD)	GWAS	UKB	413904	REACTOME_TRIF_MEDIATED_TLR3_SIGNALING
Goodman et al., 2024	38352337	Sleep (SHS-ADD)	GWAS	UKB	413904	REACTOME_AKT_PHOSPHORYLATES_TARGETS_IN_THE_CYTOSOL
Goodman et al., 2024	38352337	Sleep (SHS-ADD)	GWAS	UKB	413904	REACTOME_ACTIVATED_TLR4_SIGNALLING
Goodman et al., 2024	38352337	Sleep (SHS-ADD)	GWAS	UKB	413904	KEGG_OOCYTE_MEIOSIS
Goodman et al., 2024	38352337	Sleep (SHS-ADD)	GWAS	UKB	413904	KEGG_ANTIGEN_PROCESSING_AND_PRESENTATION
Goodman et al., 2024	38352337	Sleep (SHS-ADD)	GWAS	UKB	413904	REACTOME_PKB_MEDIATED_EVENTS
Goodman et al., 2024	38352337	Sleep (SHS-PC1)	GWAS	UKB	413904	KEGG_MAPK_SIGNALING_PATHWAY
Goodman et al., 2024	38352337	Sleep (SHS-PC1)	GWAS	UKB	413904	KEGG_UBIQUITIN_MEDIATED_PROTEOLYSIS
Goodman et al., 2024	38352337	Sleep (SHS-PC1)	GWAS	UKB	413904	REACTOME_NEURONAL_SYSTEM
Goodman et al., 2024	38352337	Sleep (SHS-PC1)	GWAS	UKB	413904	BIOCARTA_BARRESTIN_SRC_PATHWAY
Goodman et al., 2024	38352337	Sleep (SHS-PC1)	GWAS	UKB	413904	BIOCARTA_BARR_MAPK_PATHWAY
Goodman et al., 2024	38352337	Sleep (SHS-PC1)	GWAS	UKB	413904	REACTOME_HEMOSTASIS
Goodman et al., 2024	38352337	Sleep (SHS-PC1)	GWAS	UKB	413904	REACTOME_DEVELOPMENTAL_BIOLOGY
Goodman et al., 2024	38352337	Sleep (SHS-PC1)	GWAS	UKB	413904	REACTOME_OPIOID_SIGNALLING
Goodman et al., 2024	38352337	Sleep (SHS-PC1)	GWAS	UKB	413904	KEGG_CALCIUM_SIGNALING_PATHWAY
Goodman et al., 2024	38352337	Sleep (SHS-PC1)	GWAS	UKB	413904	REACTOME_PLATELET_HOMEOSTASIS
Goodman et al., 2024	38352337	Sleep (SHS-PC1)	GWAS	UKB	413904	REACTOME_INTEGRATION_OF_ENERGY_METABOLISM
Goodman et al., 2024	38352337	Sleep (SHS-PC1)	GWAS	UKB	413904	REACTOME_ELEVATION_OF_CYTOSOLIC_CA2_LEVELS
Goodman et al., 2024	38352337	Sleep (SHS-PC1)	GWAS	UKB	413904	REACTOME_PLATELET_CALCIUM_HOMEOSTASIS
Goodman et al., 2024	38352337	Sleep (SHS-PC1)	GWAS	UKB	413904	BIOCARTA_MAL_PATHWAY
Goodman et al., 2024	38352337	Sleep (SHS-PC1)	GWAS	UKB	413904	BIOCARTA_EDG1_PATHWAY
Goodman et al., 2024	38352337	Sleep (SHS-PC1)	GWAS	UKB	413904	REACTOME_PLC_BETA_MEDIATED_EVENTS
Goodman et al., 2024	38352337	Sleep (SHS-PC1)	GWAS	UKB	413904	REACTOME_TRANSMISSION_ACROSS_CHEMICAL_SYNAPSES
Goodman et al., 2024	38352337	Sleep (SHS-PC1)	GWAS	UKB	413904	BIOCARTA_SPPA_PATHWAY
Goodman et al., 2024	38352337	Sleep (SHS-PC1)	GWAS	UKB	413904	REACTOME_CYTOKINE_SIGNALING_IN_IMMUNE_SYSTEM
Goodman et al., 2024	38352337	Sleep (SHS-PC1)	GWAS	UKB	413904	BIOCARTA_AT1R_PATHWAY
Goodman et al., 2024	38352337	Sleep (SHS-PC1)	GWAS	UKB	413904	REACTOME_SIGNALING_BY_FGFR_IN_DISEASE
Goodman et al., 2024	38352337	Sleep (SHS-PC1)	GWAS	UKB	413904	REACTOME_IL1_SIGNALING
Goodman et al., 2024	38352337	Sleep (SHS-PC1)	GWAS	UKB	413904	REACTOME_REGULATION_OF_INSULIN_SECRETION
Goodman et al., 2024	38352337	Sleep (SHS-PC1)	GWAS	UKB	413904	REACTOME_EFFECTS_OF_PIP2_HYDROLYSIS
Goodman et al., 2024	38352337	Sleep (SHS-PC1)	GWAS	UKB	413904	REACTOME_ROLE_OF_SECOND_MESSENGERS_IN_NETRIN1_SIGNALING
Goodman et al., 2024	38352337	Sleep (SHS-PC1)	GWAS	UKB	413904	REACTOME_GASTRIN_CREB_SIGNALLING_PATHWAY_VIA_PKC_AND_MAPK
Goodman et al., 2024	38352337	Sleep (SHS-PC1)	GWAS	UKB	413904	KEGG_GNRH_SIGNALING_PATHWAY
Goodman et al., 2024	38352337	Sleep (SHS-PC1)	GWAS	UKB	413904	BIOCARTA_CXCR4_PATHWAY
Goodman et al., 2024	38352337	Sleep (SHS-PC1)	GWAS	UKB	413904	BIOCARTA_CREB_PATHWAY
Goodman et al., 2024	38352337	Sleep (SHS-PC1)	GWAS	UKB	413904	REACTOME_MAP_KINASE_ACTIVATION_IN_TLR_CASCADE
Goodman et al., 2024	38352337	Sleep (SHS-PC1)	GWAS	UKB	413904	REACTOME_NGF_SIGNALLING_VIA_TRKA_FROM_THE_PLASMA_MEMBRANE
Goodman et al., 2024	38352337	Sleep (SHS-PC1)	GWAS	UKB	413904	REACTOME_SIGNALING_BY_FGFR
Goodman et al., 2024	38352337	Sleep (SHS-PC1)	GWAS	UKB	413904	KEGG_ACUTE_MYELOID_LEUKEMIA
Goodman et al., 2024	38352337	Sleep (SHS-PC1)	GWAS	UKB	413904	BIOCARTA_PDGF_PATHWAY
Goodman et al., 2024	38352337	Sleep (SHS-PC1)	GWAS	UKB	413904	REACTOME_IMMUNE_SYSTEM
Goodman et al., 2024	38352337	Sleep (SHS-PC1)	GWAS	UKB	413904	BIOCARTA_IGF1R_PATHWAY
Goodman et al., 2024	38352337	Sleep (SHS-PC1)	GWAS	UKB	413904	REACTOME_TRIF_MEDIATED_TLR3_SIGNALING
Goodman et al., 2024	38352337	Sleep (SHS-PC1)	GWAS	UKB	413904	KEGG_LONG_TERM_POTENTIATION
Goodman et al., 2024	38352337	Sleep (SHS-PC1)	GWAS	UKB	413904	REACTOME_PLATELET_ACTIVATION_SIGNALING_AND_AGGREGATION
Goodman et al., 2024	38352337	Sleep (SHS-PC1)	GWAS	UKB	413904	BIOCARTA_CCR3_PATHWAY
Goodman et al., 2024	38352337	Sleep (SHS-PC1)	GWAS	UKB	413904	KEGG_LONG_TERM_DEPRESSION
Goodman et al., 2024	38352337	Sleep (SHS-PC1)	GWAS	UKB	413904	REACTOME_SIGNALING_BY_GPCR
Goodman et al., 2024	38352337	Sleep (SHS-PC1)	GWAS	UKB	413904	BIOCARTA_MAPK_PATHWAY
Goodman et al., 2024	38352337	Sleep (SHS-PC1)	GWAS	UKB	413904	REACTOME_SIGNALING_BY_BMP
Goodman et al., 2024	38352337	Sleep (SHS-PC1)	GWAS	UKB	413904	BIOCARTA_MPR_PATHWAY
Goodman et al., 2024	38352337	Sleep (SHS-PC1)	GWAS	UKB	413904	REACTOME_DOWNSTREAM_SIGNALING_OF_ACTIVATED_FGFR
Goodman et al., 2024	38352337	Sleep (SHS-PC1)	GWAS	UKB	413904	REACTOME_NFKB_AND_MAP_KINASES_ACTIVATION_MEDIATED_BY_TLR4_SIGNALING_REPERTOIRE
Goodman et al., 2024	38352337	Sleep (SHS-PC1)	GWAS	UKB	413904	KEGG_THYROID_CANCER
Goodman et al., 2024	38352337	Sleep (SHS-PC1)	GWAS	UKB	413904	REACTOME_ARMS_MEDIATED_ACTIVATION
Goodman et al., 2024	38352337	Sleep (SHS-PC1)	GWAS	UKB	413904	BIOCARTA_ERK_PATHWAY
Goodman et al., 2024	38352337	Sleep (SHS-PC1)	GWAS	UKB	413904	REACTOME_TRAF6_MEDIATED_INDUCTION_OF_NFKB_AND_MAP_KINASES_UPON_TLR7_8_OR_9_ACTIVATION
Goodman et al., 2024	38352337	Sleep (SHS-PC1)	GWAS	UKB	413904	BIOCARTA_CSK_PATHWAY
Goodman et al., 2024	38352337	Sleep (SHS-PC1)	GWAS	UKB	413904	REACTOME_FRS2_MEDIATED_CASCADE
Goodman et al., 2024	38352337	Sleep (SHS-PC1)	GWAS	UKB	413904	KEGG_OOCYTE_MEIOSIS
Goodman et al., 2024	38352337	Sleep (SHS-PC1)	GWAS	UKB	413904	BIOCARTA_BIOPEPTIDES_PATHWAY
Goodman et al., 2024	38352337	Sleep (SHS-PC1)	GWAS	UKB	413904	REACTOME_ERK_MAPK_TARGETS
Goodman et al., 2024	38352337	Sleep (SHS-PC1)	GWAS	UKB	413904	REACTOME_POTASSIUM_CHANNELS
Goodman et al., 2024	38352337	Sleep (SHS-PC1)	GWAS	UKB	413904	KEGG_NEUROTROPHIN_SIGNALING_PATHWAY
Goodman et al., 2024	38352337	Sleep (SHS-PC1)	GWAS	UKB	413904	REACTOME_SIGNALING_BY_ILS
Goodman et al., 2024	38352337	Sleep (SHS-PC1)	GWAS	UKB	413904	REACTOME_GLUCAGON_SIGNALING_IN_METABOLIC_REGULATION
Goodman et al., 2024	38352337	Sleep (SHS-PC1)	GWAS	UKB	413904	BIOCARTA_HCMV_PATHWAY
Goodman et al., 2024	38352337	Sleep (SHS-PC1)	GWAS	UKB	413904	KEGG_TERPENOID_BACKBONE_BIOSYNTHESIS
Goodman et al., 2024	38352337	Sleep (SHS-PC1)	GWAS	UKB	413904	REACTOME_G_ALPHA_Q_SIGNALLING_EVENTS
Goodman et al., 2024	38352337	Sleep (SHS-PC1)	GWAS	UKB	413904	REACTOME_SIGNALING_BY_EGFR_IN_CANCER
Goodman et al., 2024	38352337	Sleep (SHS-PC1)	GWAS	UKB	413904	REACTOME_SYNTHESIS_SECRETION_AND_INACTIVATION_OF_GIP
Goodman et al., 2024	38352337	Sleep (SHS-PC1)	GWAS	UKB	413904	REACTOME_GABA_RECEPTOR_ACTIVATION
Goodman et al., 2024	38352337	Sleep (SHS-PC1)	GWAS	UKB	413904	REACTOME_DOWNSTREAM_SIGNAL_TRANSDUCTION
Goodman et al., 2024	38352337	Sleep (SHS-PC1)	GWAS	UKB	413904	REACTOME_SHC1_EVENTS_IN_ERBB4_SIGNALING
Goodman et al., 2024	38352337	Sleep (SHS-PC1)	GWAS	UKB	413904	REACTOME_MYOGENESIS
Goodman et al., 2024	38352337	Sleep (SHS-PC1)	GWAS	UKB	413904	REACTOME_PROLONGED_ERK_ACTIVATION_EVENTS
Goodman et al., 2024	38352337	Sleep (SHS-PC1)	GWAS	UKB	413904	BIOCARTA_BAD_PATHWAY
Goodman et al., 2024	38352337	Sleep (SHS-PC1)	GWAS	UKB	413904	BIOCARTA_GH_PATHWAY
Goodman et al., 2024	38352337	Sleep (SHS-PC1)	GWAS	UKB	413904	BIOCARTA_CDK5_PATHWAY
Goodman et al., 2024	38352337	Sleep (SHS-PC1)	GWAS	UKB	413904	BIOCARTA_AGPCR_PATHWAY
Goodman et al., 2024	38352337	Sleep (SHS-PC1)	GWAS	UKB	413904	REACTOME_GPCR_DOWNSTREAM_SIGNALING
Goodman et al., 2024	38352337	Sleep (SHS-PC1)	GWAS	UKB	413904	BIOCARTA_EGF_PATHWAY
Goodman et al., 2024	38352337	Sleep (SHS-PC1)	GWAS	UKB	413904	REACTOME_FACTORS_INVOLVED_IN_MEGAKARYOCYTE_DEVELOPMENT_AND_PLATELET_PRODUCTION
Goodman et al., 2024	38352337	Sleep (SHS-PC1)	GWAS	UKB	413904	REACTOME_ACTIVATED_TLR4_SIGNALLING
Goodman et al., 2024	38352337	Sleep (SHS-PC1)	GWAS	UKB	413904	REACTOME_SIGNALLING_TO_P38_VIA_RIT_AND_RIN
Goodman et al., 2024	38352337	Sleep (SHS-PC1)	GWAS	UKB	413904	KEGG_GAP_JUNCTION
Goodman et al., 2024	38352337	Sleep (SHS-PC1)	GWAS	UKB	413904	REACTOME_MYD88_MAL_CASCADE_INITIATED_ON_PLASMA_MEMBRANE
Goodman et al., 2024	38352337	Sleep (SHS-PC1)	GWAS	UKB	413904	REACTOME_NITRIC_OXIDE_STIMULATES_GUANYLATE_CYCLASE
[truncated: 1,173 more rows]
